# Supplementary material for: A chemical probe for proteomic analysis and visualization of intracellular localization of lysine-succinylated proteins
Source: Royal Society of Chemistry journal article supplement (doi:10.1039/d2an01370c), 2022-12-05
Supplement: d2an01370c2.zip [file d2an01370c2.zip]

## Sheet: Table S1
Table S1 List of the proteins identified only in SucAM-yne-treated cell lysate by protein-based enrichment method
	Descriptions of Column Names:
	Protein Accession	UniProt accession number of the protein
	-10lgP	The score derived from the p-value that indicates the statistical significance of the peptide-precursor spectrum match (calculated by PEAKS Xpro(TM)). Higher value means reliable.
	Coverage	The sequence coverage of the protein
	#Peptides	The number of supporting peptides for the protein
	#Unique	The number of unique supporting peptides for the protein
	Avg. Mass	Averaged mass number of the protein
	Desciption	Names of proteins
	Suc position	Position of succinylated lysine residues in protein (Note: it was identified by independent experiment shown in Table S2)
	These data were combined with the results of duplicated experiments.
	Protein Accession	-10lgP	Coverage (%)	#Peptides	#Unique	Avg. Mass	Desciption	Suc position
	Q09666|AHNK_HUMAN	421.12	15	62	62	629114	Neuroblast differentiation-associated protein AHNAK OS=Homo sapiens OX=9606 GN=AHNAK PE=1 SV=2	1125, 5612
	Q9Y520-4|PRC2C_HUMAN	419.79	25	58	57	308606	Isoform 4 of Protein PRRC2C OS=Homo sapiens OX=9606 GN=PRRC2C	196, 1976, 2798
	P46821|MAP1B_HUMAN	418.73	18	28	28	270632	Microtubule-associated protein 1B OS=Homo sapiens OX=9606 GN=MAP1B PE=1 SV=2	1344, 1808
	P07197|NFM_HUMAN	413.33	48	47	46	102472	Neurofilament medium polypeptide OS=Homo sapiens OX=9606 GN=NEFM PE=1 SV=3	53, 102
	Q14157|UBP2L_HUMAN	407.49	39	25	1	114534	Ubiquitin-associated protein 2-like OS=Homo sapiens OX=9606 GN=UBAP2L PE=1 SV=2	320, 344, 420, 459
	P27816|MAP4_HUMAN	404.37	60	53	53	121005	Microtubule-associated protein 4 OS=Homo sapiens OX=9606 GN=MAP4 PE=1 SV=3	739
	Q04637-3|IF4G1_HUMAN	390.61	30	43	37	171512	Isoform B of Eukaryotic translation initiation factor 4 gamma 1 OS=Homo sapiens OX=9606 GN=EIF4G1	878, 908
	Q14247|SRC8_HUMAN	384.74	56	29	29	61586	Src substrate cortactin OS=Homo sapiens OX=9606 GN=CTTN PE=1 SV=2	107, 263, 336, 346
	Q96A49|SYAP1_HUMAN	383.71	58	23	23	39933	Synapse-associated protein 1 OS=Homo sapiens OX=9606 GN=SYAP1 PE=1 SV=1	71
	P22314-2|UBA1_HUMAN	379.66	35	31	31	113800	Isoform 2 of Ubiquitin-like modifier-activating enzyme 1 OS=Homo sapiens OX=9606 GN=UBA1
	Q92945|FUBP2_HUMAN	374.06	45	29	26	73115	Far upstream element-binding protein 2 OS=Homo sapiens OX=9606 GN=KHSRP PE=1 SV=4	109, 122
	P34932|HSP74_HUMAN	370.83	47	32	29	94331	Heat shock 70 kDa protein 4 OS=Homo sapiens OX=9606 GN=HSPA4 PE=1 SV=4	557
	Q9UBC2|EP15R_HUMAN	366.74	50	34	34	94255	Epidermal growth factor receptor substrate 15-like 1 OS=Homo sapiens OX=9606 GN=EPS15L1 PE=1 SV=1	694, 719
	P50991|TCPD_HUMAN	365.24	53	21	20	57924	T-complex protein 1 subunit delta OS=Homo sapiens OX=9606 GN=CCT4 PE=1 SV=4
	P49321|NASP_HUMAN	359.23	47	26	26	85238	Nuclear autoantigenic sperm protein OS=Homo sapiens OX=9606 GN=NASP PE=1 SV=2	634
	Q9C0C2|TB182_HUMAN	357.86	24	28	28	181795	182 kDa tankyrase-1-binding protein OS=Homo sapiens OX=9606 GN=TNKS1BP1 PE=1 SV=4	726
	Q13263|TIF1B_HUMAN	354.29	57	25	25	88550	Transcription intermediary factor 1-beta OS=Homo sapiens OX=9606 GN=TRIM28 PE=1 SV=5	469, 507, 779
	Q05682-5|CALD1_HUMAN	350.45	54	32	32	61213	Isoform 5 of Caldesmon OS=Homo sapiens OX=9606 GN=CALD1	439
	Q15459|SF3A1_HUMAN	349.51	43	28	28	88886	Splicing factor 3A subunit 1 OS=Homo sapiens OX=9606 GN=SF3A1 PE=1 SV=1	334, 354, 402
	Q14126|DSG2_HUMAN	348.24	33	25	25	122294	Desmoglein-2 OS=Homo sapiens OX=9606 GN=DSG2 PE=1 SV=2
	O14654|IRS4_HUMAN	347.73	30	26	26	133767	Insulin receptor substrate 4 OS=Homo sapiens OX=9606 GN=IRS4 PE=1 SV=1	729
	Q71U36-2|TBA1A_HUMAN	347.41	70	21	1	46297	Isoform 2 of Tubulin alpha-1A chain OS=Homo sapiens OX=9606 GN=TUBA1A
	Q9H4A3-2|WNK1_HUMAN	346.72	16	29	23	225558	Isoform 2 of Serine/threonine-protein kinase WNK1 OS=Homo sapiens OX=9606 GN=WNK1	175
	Q8WWM7|ATX2L_HUMAN	344.76	30	24	23	113374	Ataxin-2-like protein OS=Homo sapiens OX=9606 GN=ATXN2L PE=1 SV=2	207, 218, 326
	P11940|PABP1_HUMAN	341.28	46	29	20	70671	Polyadenylate-binding protein 1 OS=Homo sapiens OX=9606 GN=PABPC1 PE=1 SV=2	324
	O43491|E41L2_HUMAN	340.59	46	35	32	112588	Band 4.1-like protein 2 OS=Homo sapiens OX=9606 GN=EPB41L2 PE=1 SV=1	45, 171, 565
	P23588|IF4B_HUMAN	339.14	45	28	28	69151	Eukaryotic translation initiation factor 4B OS=Homo sapiens OX=9606 GN=EIF4B PE=1 SV=2	304, 547
	P04350|TBB4A_HUMAN	338.13	59	19	1	49586	Tubulin beta-4A chain OS=Homo sapiens OX=9606 GN=TUBB4A PE=1 SV=2
	Q8WUM4-2|PDC6I_HUMAN	337.89	37	28	28	96772	Isoform 2 of Programmed cell death 6-interacting protein OS=Homo sapiens OX=9606 GN=PDCD6IP
	P42166|LAP2A_HUMAN	337.51	43	21	13	75492	Lamina-associated polypeptide 2 isoform alpha OS=Homo sapiens OX=9606 GN=TMPO PE=1 SV=2	60, 315
	P51610-4|HCFC1_HUMAN	336.5	20	27	1	213403	Isoform 4 of Host cell factor 1 OS=Homo sapiens OX=9606 GN=HCFC1	682, 1163, 1217
	P42167|LAP2B_HUMAN	335	48	15	7	50670	Lamina-associated polypeptide 2 isoforms beta/gamma OS=Homo sapiens OX=9606 GN=TMPO PE=1 SV=2	60, 239
	P68400|CSK21_HUMAN	334.66	49	16	15	45144	Casein kinase II subunit alpha OS=Homo sapiens OX=9606 GN=CSNK2A1 PE=1 SV=1
	Q9UMX0|UBQL1_HUMAN	332.51	30	13	6	62519	Ubiquilin-1 OS=Homo sapiens OX=9606 GN=UBQLN1 PE=1 SV=2
	P78371|TCPB_HUMAN	331.1	52	20	20	57488	T-complex protein 1 subunit beta OS=Homo sapiens OX=9606 GN=CCT2 PE=1 SV=4
	Q02952-3|AKA12_HUMAN	329.6	23	23	23	180989	Isoform 3 of A-kinase anchor protein 12 OS=Homo sapiens OX=9606 GN=AKAP12	192
	Q5VT52-2|RPRD2_HUMAN	328.49	25	21	21	152587	Isoform 2 of Regulation of nuclear pre-mRNA domain-containing protein 2 OS=Homo sapiens OX=9606 GN=RPRD2
	Q96AE4|FUBP1_HUMAN	328.31	39	22	18	67560	Far upstream element-binding protein 1 OS=Homo sapiens OX=9606 GN=FUBP1 PE=1 SV=3	64
	Q9UHX1-2|PUF60_HUMAN	328.31	46	19	19	58172	Isoform 2 of Poly(U)-binding-splicing factor PUF60 OS=Homo sapiens OX=9606 GN=PUF60	80, 151
	Q9Y2Z0|SGT1_HUMAN	328	58	19	19	41024	Protein SGT1 homolog OS=Homo sapiens OX=9606 GN=SUGT1 PE=1 SV=3
	P09874|PARP1_HUMAN	327.33	28	25	25	113084	Poly [ADP-ribose] polymerase 1 OS=Homo sapiens OX=9606 GN=PARP1 PE=1 SV=4
	P78344|IF4G2_HUMAN	326.72	33	26	26	102362	Eukaryotic translation initiation factor 4 gamma 2 OS=Homo sapiens OX=9606 GN=EIF4G2 PE=1 SV=1
	Q641Q2-2|WAC2A_HUMAN	326.21	24	20	5	144941	Isoform 2 of WASH complex subunit 2A OS=Homo sapiens OX=9606 GN=WASHC2A
	Q5SW79|CE170_HUMAN	324.74	25	31	31	175292	Centrosomal protein of 170 kDa OS=Homo sapiens OX=9606 GN=CEP170 PE=1 SV=1	463
	Q14677|EPN4_HUMAN	321.6	30	16	1	68259	Clathrin interactor 1 OS=Homo sapiens OX=9606 GN=CLINT1 PE=1 SV=1	314
	P34931|HS71L_HUMAN	321.48	25	14	1	70375	Heat shock 70 kDa protein 1-like OS=Homo sapiens OX=9606 GN=HSPA1L PE=1 SV=2
	O00151|PDLI1_HUMAN	321.01	76	18	18	36072	PDZ and LIM domain protein 1 OS=Homo sapiens OX=9606 GN=PDLIM1 PE=1 SV=4	166
	P52594-2|AGFG1_HUMAN	319.81	37	14	12	54182	Isoform 2 of Arf-GAP domain and FG repeat-containing protein 1 OS=Homo sapiens OX=9606 GN=AGFG1	273, 333
	O60664-4|PLIN3_HUMAN	319.57	56	18	18	45804	Isoform 4 of Perilipin-3 OS=Homo sapiens OX=9606 GN=PLIN3	84, 128
	Q12931-2|TRAP1_HUMAN	319.21	43	22	21	74267	Isoform 2 of Heat shock protein 75 kDa mitochondrial OS=Homo sapiens OX=9606 GN=TRAP1	196
	P68371|TBB4B_HUMAN	318.02	51	17	2	49831	Tubulin beta-4B chain OS=Homo sapiens OX=9606 GN=TUBB4B PE=1 SV=1
	Q5T6F2|UBAP2_HUMAN	317.05	23	16	16	117115	Ubiquitin-associated protein 2 OS=Homo sapiens OX=9606 GN=UBAP2 PE=1 SV=1
	Q9UHD9|UBQL2_HUMAN	316.73	34	13	7	65696	Ubiquilin-2 OS=Homo sapiens OX=9606 GN=UBQLN2 PE=1 SV=2
	Q9NRR5|UBQL4_HUMAN	315.27	32	13	10	63853	Ubiquilin-4 OS=Homo sapiens OX=9606 GN=UBQLN4 PE=1 SV=2
	Q9UJU6|DBNL_HUMAN	314.33	43	15	1	48207	Drebrin-like protein OS=Homo sapiens OX=9606 GN=DBNL PE=1 SV=1	164, 280
	O95817|BAG3_HUMAN	314.18	33	16	16	61595	BAG family molecular chaperone regulator 3 OS=Homo sapiens OX=9606 GN=BAG3 PE=1 SV=3
	P20073-2|ANXA7_HUMAN	311.89	38	19	19	50316	Isoform 2 of Annexin A7 OS=Homo sapiens OX=9606 GN=ANXA7
	P31948|STIP1_HUMAN	311.31	42	25	25	62639	Stress-induced-phosphoprotein 1 OS=Homo sapiens OX=9606 GN=STIP1 PE=1 SV=1
	Q9UNZ2|NSF1C_HUMAN	309.9	53	16	16	40573	NSFL1 cofactor p47 OS=Homo sapiens OX=9606 GN=NSFL1C PE=1 SV=2	171
	O60271|JIP4_HUMAN	308.55	20	20	20	146205	C-Jun-amino-terminal kinase-interacting protein 4 OS=Homo sapiens OX=9606 GN=SPAG9 PE=1 SV=4	433, 1108
	P31939|PUR9_HUMAN	307.55	38	17	17	64616	Bifunctional purine biosynthesis protein PURH OS=Homo sapiens OX=9606 GN=ATIC PE=1 SV=3
	P17844|DDX5_HUMAN	307	43	25	17	69148	Probable ATP-dependent RNA helicase DDX5 OS=Homo sapiens OX=9606 GN=DDX5 PE=1 SV=1
	P06748|NPM_HUMAN	306.98	51	12	12	32575	Nucleophosmin OS=Homo sapiens OX=9606 GN=NPM1 PE=1 SV=2
	Q8N6T3|ARFG1_HUMAN	306.64	48	15	15	44668	ADP-ribosylation factor GTPase-activating protein 1 OS=Homo sapiens OX=9606 GN=ARFGAP1 PE=1 SV=2	162, 278
	Q8N183|NDUF2_HUMAN	306.18	67	13	13	19856	NADH dehydrogenase [ubiquinone] 1 alpha subcomplex assembly factor 2 OS=Homo sapiens OX=9606 GN=NDUFAF2 PE=1 SV=1	140, 152
	Q16204|CCDC6_HUMAN	306.14	39	18	18	53291	Coiled-coil domain-containing protein 6 OS=Homo sapiens OX=9606 GN=CCDC6 PE=1 SV=2
	P20810-2|ICAL_HUMAN	306	31	15	15	75305	Isoform 2 of Calpastatin OS=Homo sapiens OX=9606 GN=CAST
	Q8NC51|PAIRB_HUMAN	305.45	43	19	19	44965	Plasminogen activator inhibitor 1 RNA-binding protein OS=Homo sapiens OX=9606 GN=SERBP1 PE=1 SV=2	68, 228, 390
	P48634|PRC2A_HUMAN	302.65	18	27	26	228861	Protein PRRC2A OS=Homo sapiens OX=9606 GN=PRRC2A PE=1 SV=3	123, 140, 224
	Q9BUJ2-2|HNRL1_HUMAN	302.38	36	23	23	90292	Isoform 2 of Heterogeneous nuclear ribonucleoprotein U-like protein 1 OS=Homo sapiens OX=9606 GN=HNRNPUL1	62
	Q13310-2|PABP4_HUMAN	301.61	30	20	10	69579	Isoform 2 of Polyadenylate-binding protein 4 OS=Homo sapiens OX=9606 GN=PABPC4
	Q86UE4|LYRIC_HUMAN	301.48	48	21	21	63837	Protein LYRIC OS=Homo sapiens OX=9606 GN=MTDH PE=1 SV=2	316
	Q92734-2|TFG_HUMAN	300.98	38	11	11	43020	Isoform 2 of Protein TFG OS=Homo sapiens OX=9606 GN=TFG
	Q9Y4E1-3|WAC2C_HUMAN	300.55	20	16	1	138145	Isoform 3 of WASH complex subunit 2C OS=Homo sapiens OX=9606 GN=WASHC2C
	Q8N8S7-3|ENAH_HUMAN	299.63	39	17	17	60349	Isoform 3 of Protein enabled homolog OS=Homo sapiens OX=9606 GN=ENAH	390
	O14964|HGS_HUMAN	298.78	24	16	16	86192	Hepatocyte growth factor-regulated tyrosine kinase substrate OS=Homo sapiens OX=9606 GN=HGS PE=1 SV=1
	P63244|RACK1_HUMAN	298.52	54	14	14	35077	Receptor of activated protein C kinase 1 OS=Homo sapiens OX=9606 GN=RACK1 PE=1 SV=3
	Q16555-2|DPYL2_HUMAN	298.21	32	11	11	58163	Isoform 2 of Dihydropyrimidinase-related protein 2 OS=Homo sapiens OX=9606 GN=DPYSL2	475
	Q9Y6A5|TACC3_HUMAN	298.02	34	19	19	90360	Transforming acidic coiled-coil-containing protein 3 OS=Homo sapiens OX=9606 GN=TACC3 PE=1 SV=1
	P49327|FAS_HUMAN	297.94	11	19	19	273424	Fatty acid synthase OS=Homo sapiens OX=9606 GN=FASN PE=1 SV=3
	Q8N0X7|SPART_HUMAN	294.85	31	18	18	72833	Spartin OS=Homo sapiens OX=9606 GN=SPART PE=1 SV=1
	P51858|HDGF_HUMAN	294.68	67	14	13	26788	Hepatoma-derived growth factor OS=Homo sapiens OX=9606 GN=HDGF PE=1 SV=1
	O14776-2|TCRG1_HUMAN	294.27	21	24	24	121690	Isoform 2 of Transcription elongation regulator 1 OS=Homo sapiens OX=9606 GN=TCERG1
	Q9UKX7|NUP50_HUMAN	293.93	35	12	12	50144	Nuclear pore complex protein Nup50 OS=Homo sapiens OX=9606 GN=NUP50 PE=1 SV=2	121, 201, 247
	P46937-6|YAP1_HUMAN	293.43	33	10	10	49989	Isoform 6 of Transcriptional coactivator YAP1 OS=Homo sapiens OX=9606 GN=YAP1
	O75400-2|PR40A_HUMAN	293.18	23	20	20	105927	Isoform 2 of Pre-mRNA-processing factor 40 homolog A OS=Homo sapiens OX=9606 GN=PRPF40A	206
	O00571-2|DDX3X_HUMAN	292.66	30	19	18	71355	Isoform 2 of ATP-dependent RNA helicase DDX3X OS=Homo sapiens OX=9606 GN=DDX3X	55, 64, 66
	Q15942|ZYX_HUMAN	292.61	33	13	13	61277	Zyxin OS=Homo sapiens OX=9606 GN=ZYX PE=1 SV=1	27
	Q13177|PAK2_HUMAN	292.41	35	13	8	58043	Serine/threonine-protein kinase PAK 2 OS=Homo sapiens OX=9606 GN=PAK2 PE=1 SV=3
	Q01518-2|CAP1_HUMAN	291.86	36	14	13	51830	Isoform 2 of Adenylyl cyclase-associated protein 1 OS=Homo sapiens OX=9606 GN=CAP1
	Q92841|DDX17_HUMAN	291.75	30	18	10	80273	Probable ATP-dependent RNA helicase DDX17 OS=Homo sapiens OX=9606 GN=DDX17 PE=1 SV=2
	P17987|TCPA_HUMAN	291.52	40	17	17	60344	T-complex protein 1 subunit alpha OS=Homo sapiens OX=9606 GN=TCP1 PE=1 SV=1
	Q9BX40|LS14B_HUMAN	291.41	39	10	7	42071	Protein LSM14 homolog B OS=Homo sapiens OX=9606 GN=LSM14B PE=1 SV=1
	P31943|HNRH1_HUMAN	290.65	35	11	5	49229	Heterogeneous nuclear ribonucleoprotein H OS=Homo sapiens OX=9606 GN=HNRNPH1 PE=1 SV=4
	P42566|EPS15_HUMAN	290.57	23	14	14	98656	Epidermal growth factor receptor substrate 15 OS=Homo sapiens OX=9606 GN=EPS15 PE=1 SV=2
	P14866|HNRPL_HUMAN	290.07	32	12	12	64133	Heterogeneous nuclear ribonucleoprotein L OS=Homo sapiens OX=9606 GN=HNRNPL PE=1 SV=2
	Q92665|RT31_HUMAN	289.73	37	12	12	45319	28S ribosomal protein S31 mitochondrial OS=Homo sapiens OX=9606 GN=MRPS31 PE=1 SV=3
	P50995-2|ANX11_HUMAN	289.48	34	16	16	51242	Isoform 2 of Annexin A11 OS=Homo sapiens OX=9606 GN=ANXA11
	Q9NTZ6|RBM12_HUMAN	288.62	21	17	17	97396	RNA-binding protein 12 OS=Homo sapiens OX=9606 GN=RBM12 PE=1 SV=1
	O14974|MYPT1_HUMAN	288.43	21	20	20	115281	Protein phosphatase 1 regulatory subunit 12A OS=Homo sapiens OX=9606 GN=PPP1R12A PE=1 SV=1
	Q7LBC6|KDM3B_HUMAN	288.26	16	18	18	191580	Lysine-specific demethylase 3B OS=Homo sapiens OX=9606 GN=KDM3B PE=1 SV=2	669, 688
	P12956|XRCC6_HUMAN	287.62	33	15	15	69843	X-ray repair cross-complementing protein 6 OS=Homo sapiens OX=9606 GN=XRCC6 PE=1 SV=2
	Q9UKY7|CDV3_HUMAN	287.29	66	12	8	27335	Protein CDV3 homolog OS=Homo sapiens OX=9606 GN=CDV3 PE=1 SV=1	109, 203
	Q9BVA1|TBB2B_HUMAN	287.29	37	13	1	49953	Tubulin beta-2B chain OS=Homo sapiens OX=9606 GN=TUBB2B PE=1 SV=1
	P26641-2|EF1G_HUMAN	287.18	39	20	20	56150	Isoform 2 of Elongation factor 1-gamma OS=Homo sapiens OX=9606 GN=EEF1G
	Q14671|PUM1_HUMAN	286.84	16	14	12	126473	Pumilio homolog 1 OS=Homo sapiens OX=9606 GN=PUM1 PE=1 SV=3
	P27694|RFA1_HUMAN	285.5	27	12	12	68138	Replication protein A 70 kDa DNA-binding subunit OS=Homo sapiens OX=9606 GN=RPA1 PE=1 SV=2	183
	P04792|HSPB1_HUMAN	285.48	63	12	12	22783	Heat shock protein beta-1 OS=Homo sapiens OX=9606 GN=HSPB1 PE=1 SV=2
	Q9BQE3|TBA1C_HUMAN	285.44	36	14	1	49895	Tubulin alpha-1C chain OS=Homo sapiens OX=9606 GN=TUBA1C PE=1 SV=1
	P35637-2|FUS_HUMAN	284.87	22	10	8	53355	Isoform Short of RNA-binding protein FUS OS=Homo sapiens OX=9606 GN=FUS
	P46109|CRKL_HUMAN	284.42	42	11	11	33777	Crk-like protein OS=Homo sapiens OX=9606 GN=CRKL PE=1 SV=1
	P0DPH7-2|TBA3C_HUMAN	284.2	37	12	1	46112	Isoform 2 of Tubulin alpha-3C chain OS=Homo sapiens OX=9606 GN=TUBA3C
	Q9HB71|CYBP_HUMAN	283.89	57	13	13	26210	Calcyclin-binding protein OS=Homo sapiens OX=9606 GN=CACYBP PE=1 SV=2
	P29966|MARCS_HUMAN	283.67	50	10	10	31555	Myristoylated alanine-rich C-kinase substrate OS=Homo sapiens OX=9606 GN=MARCKS PE=1 SV=4	30, 87, 105, 137
	Q5JTV8-3|TOIP1_HUMAN	283.6	31	14	14	66320	Isoform 3 of Torsin-1A-interacting protein 1 OS=Homo sapiens OX=9606 GN=TOR1AIP1
	P23246|SFPQ_HUMAN	283.24	31	20	20	76150	Splicing factor proline- and glutamine-rich OS=Homo sapiens OX=9606 GN=SFPQ PE=1 SV=2
	Q15691|MARE1_HUMAN	282.93	54	11	11	29999	Microtubule-associated protein RP/EB family member 1 OS=Homo sapiens OX=9606 GN=MAPRE1 PE=1 SV=3	151
	Q9Y6Y8|S23IP_HUMAN	280.8	20	19	19	111076	SEC23-interacting protein OS=Homo sapiens OX=9606 GN=SEC23IP PE=1 SV=1
	P33240-2|CSTF2_HUMAN	279.98	38	15	7	59251	Isoform 2 of Cleavage stimulation factor subunit 2 OS=Homo sapiens OX=9606 GN=CSTF2
	Q16543|CDC37_HUMAN	279.51	42	17	17	44468	Hsp90 co-chaperone Cdc37 OS=Homo sapiens OX=9606 GN=CDC37 PE=1 SV=1	347
	P15311|EZRI_HUMAN	279.43	34	22	13	69413	Ezrin OS=Homo sapiens OX=9606 GN=EZR PE=1 SV=4
	P39880-3|CUX1_HUMAN	278.82	11	14	14	165687	Isoform 3 of Homeobox protein cut-like 1 OS=Homo sapiens OX=9606 GN=CUX1
	O95208-2|EPN2_HUMAN	278.09	23	12	11	62300	Isoform 2 of Epsin-2 OS=Homo sapiens OX=9606 GN=EPN2	138
	Q9H6Z4-2|RANB3_HUMAN	277.99	30	13	13	59694	Isoform 2 of Ran-binding protein 3 OS=Homo sapiens OX=9606 GN=RANBP3
	Q7Z417|NUFP2_HUMAN	277.98	29	14	14	76121	Nuclear fragile X mental retardation-interacting protein 2 OS=Homo sapiens OX=9606 GN=NUFIP2 PE=1 SV=1	639
	P50402|EMD_HUMAN	277.67	49	11	11	28994	Emerin OS=Homo sapiens OX=9606 GN=EMD PE=1 SV=1	88
	Q13283|G3BP1_HUMAN	277.62	41	12	12	52164	Ras GTPase-activating protein-binding protein 1 OS=Homo sapiens OX=9606 GN=G3BP1 PE=1 SV=1	257, 287
	O43615|TIM44_HUMAN	277.26	39	20	20	51356	Mitochondrial import inner membrane translocase subunit TIM44 OS=Homo sapiens OX=9606 GN=TIMM44 PE=1 SV=2	138
	P51148|RAB5C_HUMAN	277.15	59	9	6	23483	Ras-related protein Rab-5C OS=Homo sapiens OX=9606 GN=RAB5C PE=1 SV=2
	Q9Y6G9|DC1L1_HUMAN	277.13	40	13	13	56579	Cytoplasmic dynein 1 light intermediate chain 1 OS=Homo sapiens OX=9606 GN=DYNC1LI1 PE=1 SV=3	428
	O43399|TPD54_HUMAN	276.94	69	12	4	22238	Tumor protein D54 OS=Homo sapiens OX=9606 GN=TPD52L2 PE=1 SV=2
	Q92783-2|STAM1_HUMAN	276.76	35	11	10	44972	Isoform 2 of Signal transducing adapter molecule 1 OS=Homo sapiens OX=9606 GN=STAM	386
	Q13492-3|PICAL_HUMAN	276.74	28	15	15	66393	Isoform 3 of Phosphatidylinositol-binding clathrin assembly protein OS=Homo sapiens OX=9606 GN=PICALM
	Q86YP4-2|P66A_HUMAN	276.29	33	14	13	65226	Isoform 2 of Transcriptional repressor p66-alpha OS=Homo sapiens OX=9606 GN=GATAD2A	178
	P52272-2|HNRPM_HUMAN	275.89	37	24	24	73621	Isoform 2 of Heterogeneous nuclear ribonucleoprotein M OS=Homo sapiens OX=9606 GN=HNRNPM
	P26599|PTBP1_HUMAN	275.2	44	15	15	57221	Polypyrimidine tract-binding protein 1 OS=Homo sapiens OX=9606 GN=PTBP1 PE=1 SV=1
	Q13435|SF3B2_HUMAN	275.16	22	15	15	100228	Splicing factor 3B subunit 2 OS=Homo sapiens OX=9606 GN=SF3B2 PE=1 SV=2
	P22626|ROA2_HUMAN	274.83	43	14	12	37430	Heterogeneous nuclear ribonucleoproteins A2/B1 OS=Homo sapiens OX=9606 GN=HNRNPA2B1 PE=1 SV=2
	P29401|TKT_HUMAN	274.83	26	12	12	67878	Transketolase OS=Homo sapiens OX=9606 GN=TKT PE=1 SV=3
	Q8IX12-2|CCAR1_HUMAN	274.78	17	18	18	131043	Isoform 2 of Cell division cycle and apoptosis regulator protein 1 OS=Homo sapiens OX=9606 GN=CCAR1
	Q9Y383|LC7L2_HUMAN	274.72	36	13	9	46514	Putative RNA-binding protein Luc7-like 2 OS=Homo sapiens OX=9606 GN=LUC7L2 PE=1 SV=2
	P08195|4F2_HUMAN	273.94	26	13	13	67994	4F2 cell-surface antigen heavy chain OS=Homo sapiens OX=9606 GN=SLC3A2 PE=1 SV=3
	O95218-2|ZRAB2_HUMAN	273.74	41	14	14	36318	Isoform 2 of Zinc finger Ran-binding domain-containing protein 2 OS=Homo sapiens OX=9606 GN=ZRANB2
	P22102|PUR2_HUMAN	273.25	19	15	15	107767	Trifunctional purine biosynthetic protein adenosine-3 OS=Homo sapiens OX=9606 GN=GART PE=1 SV=1
	P27824|CALX_HUMAN	272.94	23	10	10	67568	Calnexin OS=Homo sapiens OX=9606 GN=CANX PE=1 SV=2
	P24534|EF1B_HUMAN	272.86	44	9	6	24764	Elongation factor 1-beta OS=Homo sapiens OX=9606 GN=EEF1B2 PE=1 SV=3	176
	Q15750|TAB1_HUMAN	272.35	30	10	10	54644	TGF-beta-activated kinase 1 and MAP3K7-binding protein 1 OS=Homo sapiens OX=9606 GN=TAB1 PE=1 SV=1	402
	P12004|PCNA_HUMAN	272.18	44	9	9	28769	Proliferating cell nuclear antigen OS=Homo sapiens OX=9606 GN=PCNA PE=1 SV=1
	P98082|DAB2_HUMAN	272.15	29	15	15	82448	Disabled homolog 2 OS=Homo sapiens OX=9606 GN=DAB2 PE=1 SV=3
	Q99961|SH3G1_HUMAN	271.98	41	14	14	41490	Endophilin-A2 OS=Homo sapiens OX=9606 GN=SH3GL1 PE=1 SV=1	76
	P62701|RS4X_HUMAN	271.75	47	14	14	29598	40S ribosomal protein S4 X isoform OS=Homo sapiens OX=9606 GN=RPS4X PE=1 SV=2
	P51617-2|IRAK1_HUMAN	271.31	26	12	12	73421	Isoform 2 of Interleukin-1 receptor-associated kinase 1 OS=Homo sapiens OX=9606 GN=IRAK1
	Q96DF8|ESS2_HUMAN	270.9	37	11	11	52568	Splicing factor ESS-2 homolog OS=Homo sapiens OX=9606 GN=ESS2 PE=1 SV=1
	Q9Y266|NUDC_HUMAN	270.34	46	17	17	38243	Nuclear migration protein nudC OS=Homo sapiens OX=9606 GN=NUDC PE=1 SV=1
	Q96F45|ZN503_HUMAN	269.47	21	9	8	62555	Zinc finger protein 503 OS=Homo sapiens OX=9606 GN=ZNF503 PE=1 SV=1
	Q13573|SNW1_HUMAN	269.19	35	15	15	61495	SNW domain-containing protein 1 OS=Homo sapiens OX=9606 GN=SNW1 PE=1 SV=1	193
	O00273|DFFA_HUMAN	269.16	53	13	4	36522	DNA fragmentation factor subunit alpha OS=Homo sapiens OX=9606 GN=DFFA PE=1 SV=1
	Q9H8Y8|GORS2_HUMAN	269.07	41	12	12	47145	Golgi reassembly-stacking protein 2 OS=Homo sapiens OX=9606 GN=GORASP2 PE=1 SV=3
	Q14444-2|CAPR1_HUMAN	269.06	35	15	15	76862	Isoform 2 of Caprin-1 OS=Homo sapiens OX=9606 GN=CAPRIN1	55
	Q9H910|JUPI2_HUMAN	269.02	73	11	11	20063	Jupiter microtubule associated homolog 2 OS=Homo sapiens OX=9606 GN=JPT2 PE=1 SV=1
	Q14320|FA50A_HUMAN	268.47	43	14	14	40242	Protein FAM50A OS=Homo sapiens OX=9606 GN=FAM50A PE=1 SV=2
	Q96HC4|PDLI5_HUMAN	268.19	27	13	13	63945	PDZ and LIM domain protein 5 OS=Homo sapiens OX=9606 GN=PDLIM5 PE=1 SV=5	116
	Q7Z5L9|I2BP2_HUMAN	267.73	27	10	1	61025	Interferon regulatory factor 2-binding protein 2 OS=Homo sapiens OX=9606 GN=IRF2BP2 PE=1 SV=2	372
	O75533|SF3B1_HUMAN	267.04	14	12	12	145830	Splicing factor 3B subunit 1 OS=Homo sapiens OX=9606 GN=SF3B1 PE=1 SV=3	240, 252
	P09211|GSTP1_HUMAN	266.41	66	9	9	23356	Glutathione S-transferase P OS=Homo sapiens OX=9606 GN=GSTP1 PE=1 SV=2
	Q5JSZ5|PRC2B_HUMAN	266.22	9	15	13	242964	Protein PRRC2B OS=Homo sapiens OX=9606 GN=PRRC2B PE=1 SV=2
	Q7L0Y3|TM10C_HUMAN	266.18	36	11	11	47347	tRNA methyltransferase 10 homolog C OS=Homo sapiens OX=9606 GN=TRMT10C PE=1 SV=2	86
	P62136|PP1A_HUMAN	266.09	42	12	2	37512	Serine/threonine-protein phosphatase PP1-alpha catalytic subunit OS=Homo sapiens OX=9606 GN=PPP1CA PE=1 SV=1
	O60749|SNX2_HUMAN	265.73	29	14	12	58471	Sorting nexin-2 OS=Homo sapiens OX=9606 GN=SNX2 PE=1 SV=2
	P55036|PSMD4_HUMAN	265.63	38	10	10	40737	26S proteasome non-ATPase regulatory subunit 4 OS=Homo sapiens OX=9606 GN=PSMD4 PE=1 SV=1
	P54886-2|P5CS_HUMAN	264.87	24	17	17	87089	Isoform Short of Delta-1-pyrroline-5-carboxylate synthase OS=Homo sapiens OX=9606 GN=ALDH18A1	660, 779
	P82094|TMF1_HUMAN	264.77	16	13	13	122842	TATA element modulatory factor OS=Homo sapiens OX=9606 GN=TMF1 PE=1 SV=2
	P50502|F10A1_HUMAN	264.7	39	11	11	41332	Hsc70-interacting protein OS=Homo sapiens OX=9606 GN=ST13 PE=1 SV=2
	P22234|PUR6_HUMAN	264.54	32	11	11	47079	Multifunctional protein ADE2 OS=Homo sapiens OX=9606 GN=PAICS PE=1 SV=3	30
	O94979-3|SC31A_HUMAN	264.21	18	16	16	121651	Isoform 3 of Protein transport protein Sec31A OS=Homo sapiens OX=9606 GN=SEC31A
	Q9Y6I3|EPN1_HUMAN	263.79	34	11	9	60293	Epsin-1 OS=Homo sapiens OX=9606 GN=EPN1 PE=1 SV=2
	P68133|ACTS_HUMAN	263.69	30	10	1	42051	Actin alpha skeletal muscle OS=Homo sapiens OX=9606 GN=ACTA1 PE=1 SV=1
	Q96PK6|RBM14_HUMAN	262.4	20	11	9	69492	RNA-binding protein 14 OS=Homo sapiens OX=9606 GN=RBM14 PE=1 SV=2
	P51149|RAB7A_HUMAN	262.39	49	8	8	23490	Ras-related protein Rab-7a OS=Homo sapiens OX=9606 GN=RAB7A PE=1 SV=1
	P62140|PP1B_HUMAN	262.18	40	11	2	37187	Serine/threonine-protein phosphatase PP1-beta catalytic subunit OS=Homo sapiens OX=9606 GN=PPP1CB PE=1 SV=3
	Q15366|PCBP2_HUMAN	261.67	55	12	8	38580	Poly(rC)-binding protein 2 OS=Homo sapiens OX=9606 GN=PCBP2 PE=1 SV=1
	P60842|IF4A1_HUMAN	261.27	34	12	10	46154	Eukaryotic initiation factor 4A-I OS=Homo sapiens OX=9606 GN=EIF4A1 PE=1 SV=1
	P62820|RAB1A_HUMAN	259.72	56	10	4	22678	Ras-related protein Rab-1A OS=Homo sapiens OX=9606 GN=RAB1A PE=1 SV=3	49
	Q01844-6|EWS_HUMAN	259.67	16	7	7	62508	Isoform 6 of RNA-binding protein EWS OS=Homo sapiens OX=9606 GN=EWSR1
	P63267|ACTH_HUMAN	259.54	27	10	1	41877	Actin gamma-enteric smooth muscle OS=Homo sapiens OX=9606 GN=ACTG2 PE=1 SV=1
	Q7Z434|MAVS_HUMAN	259.27	30	10	10	56528	Mitochondrial antiviral-signaling protein OS=Homo sapiens OX=9606 GN=MAVS PE=1 SV=2	156, 190
	P15170|ERF3A_HUMAN	259.12	29	11	11	55756	Eukaryotic peptide chain release factor GTP-binding subunit ERF3A OS=Homo sapiens OX=9606 GN=GSPT1 PE=1 SV=1
	Q99700-2|ATX2_HUMAN	259.03	14	10	9	106048	Isoform 2 of Ataxin-2 OS=Homo sapiens OX=9606 GN=ATXN2	893
	Q99614|TTC1_HUMAN	258.95	37	9	9	33526	Tetratricopeptide repeat protein 1 OS=Homo sapiens OX=9606 GN=TTC1 PE=1 SV=1
	P35520|CBS_HUMAN	258.5	32	13	13	60587	Cystathionine beta-synthase OS=Homo sapiens OX=9606 GN=CBS PE=1 SV=2
	Q14103-3|HNRPD_HUMAN	258.13	38	11	9	32835	Isoform 3 of Heterogeneous nuclear ribonucleoprotein D0 OS=Homo sapiens OX=9606 GN=HNRNPD
	P49368|TCPG_HUMAN	257.87	31	14	14	60534	T-complex protein 1 subunit gamma OS=Homo sapiens OX=9606 GN=CCT3 PE=1 SV=4
	P63241|IF5A1_HUMAN	257.81	51	9	9	16832	Eukaryotic translation initiation factor 5A-1 OS=Homo sapiens OX=9606 GN=EIF5A PE=1 SV=2
	P62633-2|CNBP_HUMAN	257.79	51	7	1	18742	Isoform 2 of Cellular nucleic acid-binding protein OS=Homo sapiens OX=9606 GN=CNBP	145
	P55072|TERA_HUMAN	257.74	22	14	14	89322	Transitional endoplasmic reticulum ATPase OS=Homo sapiens OX=9606 GN=VCP PE=1 SV=4
	Q9Y624|JAM1_HUMAN	257.21	36	9	9	32583	Junctional adhesion molecule A OS=Homo sapiens OX=9606 GN=F11R PE=1 SV=1
	Q04917|1433F_HUMAN	257.1	57	13	8	28219	14-3-3 protein eta OS=Homo sapiens OX=9606 GN=YWHAH PE=1 SV=4
	Q96IZ0|PAWR_HUMAN	256.78	31	8	8	36568	PRKC apoptosis WT1 regulator protein OS=Homo sapiens OX=9606 GN=PAWR PE=1 SV=1
	Q6FI81-3|CPIN1_HUMAN	256.17	36	10	10	32213	Isoform 3 of Anamorsin OS=Homo sapiens OX=9606 GN=CIAPIN1	174
	Q8ND56|LS14A_HUMAN	255.86	25	12	1	50530	Protein LSM14 homolog A OS=Homo sapiens OX=9606 GN=LSM14A PE=1 SV=3
	P78310|CXAR_HUMAN	255.8	55	15	2	40030	Coxsackievirus and adenovirus receptor OS=Homo sapiens OX=9606 GN=CXADR PE=1 SV=1
	P20290-2|BTF3_HUMAN	255.41	58	8	8	17699	Isoform 2 of Transcription factor BTF3 OS=Homo sapiens OX=9606 GN=BTF3
	P18669|PGAM1_HUMAN	255.26	51	10	10	28804	Phosphoglycerate mutase 1 OS=Homo sapiens OX=9606 GN=PGAM1 PE=1 SV=2
	P14859-4|PO2F1_HUMAN	255.17	20	8	8	68144	Isoform 4 of POU domain class 2 transcription factor 1 OS=Homo sapiens OX=9606 GN=POU2F1	272
	O14497|ARI1A_HUMAN	255.06	5	7	5	242042	AT-rich interactive domain-containing protein 1A OS=Homo sapiens OX=9606 GN=ARID1A PE=1 SV=3
	Q12888|TP53B_HUMAN	255.05	9	13	13	213573	TP53-binding protein 1 OS=Homo sapiens OX=9606 GN=TP53BP1 PE=1 SV=2
	P13010|XRCC5_HUMAN	255.04	26	16	16	82705	X-ray repair cross-complementing protein 5 OS=Homo sapiens OX=9606 GN=XRCC5 PE=1 SV=3
	Q96D71-3|REPS1_HUMAN	255.01	18	9	9	86591	Isoform 3 of RalBP1-associated Eps domain-containing protein 1 OS=Homo sapiens OX=9606 GN=REPS1
	P61020|RAB5B_HUMAN	254.94	48	8	5	23707	Ras-related protein Rab-5B OS=Homo sapiens OX=9606 GN=RAB5B PE=1 SV=1
	Q04837|SSBP_HUMAN	254.87	53	8	8	17260	Single-stranded DNA-binding protein mitochondrial OS=Homo sapiens OX=9606 GN=SSBP1 PE=1 SV=1	81
	P48643|TCPE_HUMAN	254.72	30	15	14	59671	T-complex protein 1 subunit epsilon OS=Homo sapiens OX=9606 GN=CCT5 PE=1 SV=1
	P49790|NU153_HUMAN	254.68	10	10	10	153938	Nuclear pore complex protein Nup153 OS=Homo sapiens OX=9606 GN=NUP153 PE=1 SV=2	862
	Q15637-5|SF01_HUMAN	253.84	22	11	11	71752	Isoform 5 of Splicing factor 1 OS=Homo sapiens OX=9606 GN=SF1
	P54727|RD23B_HUMAN	253.69	37	13	11	43171	UV excision repair protein RAD23 homolog B OS=Homo sapiens OX=9606 GN=RAD23B PE=1 SV=1
	O75179-6|ANR17_HUMAN	253.45	7	10	5	246748	Isoform 6 of Ankyrin repeat domain-containing protein 17 OS=Homo sapiens OX=9606 GN=ANKRD17	1820
	Q13126-4|MTAP_HUMAN	253.42	50	9	9	30838	Isoform 4 of S-methyl-5'-thioadenosine phosphorylase OS=Homo sapiens OX=9606 GN=MTAP
	Q99714-2|HCD2_HUMAN	253.31	55	8	8	25984	Isoform 2 of 3-hydroxyacyl-CoA dehydrogenase type-2 OS=Homo sapiens OX=9606 GN=HSD17B10
	Q7Z739|YTHD3_HUMAN	253.25	24	13	7	63861	YTH domain-containing family protein 3 OS=Homo sapiens OX=9606 GN=YTHDF3 PE=1 SV=1	180
	O15027-2|SC16A_HUMAN	253.09	5	8	8	247244	Isoform 2 of Protein transport protein Sec16A OS=Homo sapiens OX=9606 GN=SEC16A	72
	Q9H0L4|CSTFT_HUMAN	252.82	23	11	3	64436	Cleavage stimulation factor subunit 2 tau variant OS=Homo sapiens OX=9606 GN=CSTF2T PE=1 SV=1
	Q9Y2J2-2|E41L3_HUMAN	252.56	19	12	8	96514	Isoform 2 of Band 4.1-like protein 3 OS=Homo sapiens OX=9606 GN=EPB41L3	745
	P37802|TAGL2_HUMAN	252	61	11	11	22391	Transgelin-2 OS=Homo sapiens OX=9606 GN=TAGLN2 PE=1 SV=3
	O00267-2|SPT5H_HUMAN	251.55	12	9	9	120499	Isoform 2 of Transcription elongation factor SPT5 OS=Homo sapiens OX=9606 GN=SUPT5H
	P35613-2|BASI_HUMAN	251.21	37	8	8	29221	Isoform 2 of Basigin OS=Homo sapiens OX=9606 GN=BSG
	Q16643-3|DREB_HUMAN	251.2	20	9	9	76300	Isoform 3 of Drebrin OS=Homo sapiens OX=9606 GN=DBN1
	O75190|DNJB6_HUMAN	251.14	33	12	11	36087	DnaJ homolog subfamily B member 6 OS=Homo sapiens OX=9606 GN=DNAJB6 PE=1 SV=2
	Q08211|DHX9_HUMAN	251.09	13	13	13	140958	ATP-dependent RNA helicase A OS=Homo sapiens OX=9606 GN=DHX9 PE=1 SV=4
	P24752|THIL_HUMAN	250.78	32	9	9	45200	Acetyl-CoA acetyltransferase mitochondrial OS=Homo sapiens OX=9606 GN=ACAT1 PE=1 SV=1
	Q7Z2W4|ZCCHV_HUMAN	250.17	14	10	10	101431	Zinc finger CCCH-type antiviral protein 1 OS=Homo sapiens OX=9606 GN=ZC3HAV1 PE=1 SV=3
	P31350|RIR2_HUMAN	249.25	39	12	12	44878	Ribonucleoside-diphosphate reductase subunit M2 OS=Homo sapiens OX=9606 GN=RRM2 PE=1 SV=1	90
	Q92733|PRCC_HUMAN	249.23	43	9	9	52418	Proline-rich protein PRCC OS=Homo sapiens OX=9606 GN=PRCC PE=1 SV=1
	Q86Y82|STX12_HUMAN	249	38	8	8	31642	Syntaxin-12 OS=Homo sapiens OX=9606 GN=STX12 PE=1 SV=1
	P50395|GDIB_HUMAN	248.93	25	8	5	50663	Rab GDP dissociation inhibitor beta OS=Homo sapiens OX=9606 GN=GDI2 PE=1 SV=2
	O43765|SGTA_HUMAN	247.94	38	10	10	34063	Small glutamine-rich tetratricopeptide repeat-containing protein alpha OS=Homo sapiens OX=9606 GN=SGTA PE=1 SV=1
	P35611-2|ADDA_HUMAN	247.65	19	10	10	69985	Isoform 2 of Alpha-adducin OS=Homo sapiens OX=9606 GN=ADD1	543
	P15531|NDKA_HUMAN	247.32	58	9	1	17149	Nucleoside diphosphate kinase A OS=Homo sapiens OX=9606 GN=NME1 PE=1 SV=1
	Q9Y3F4|STRAP_HUMAN	247.32	43	12	12	38438	Serine-threonine kinase receptor-associated protein OS=Homo sapiens OX=9606 GN=STRAP PE=1 SV=1
	P40855|PEX19_HUMAN	247.12	38	8	8	32807	Peroxisomal biogenesis factor 19 OS=Homo sapiens OX=9606 GN=PEX19 PE=1 SV=1
	P11171|41_HUMAN	246.09	20	12	11	97017	Protein 4.1 OS=Homo sapiens OX=9606 GN=EPB41 PE=1 SV=4
	Q8IWZ3|ANKH1_HUMAN	245.81	6	12	7	269455	Ankyrin repeat and KH domain-containing protein 1 OS=Homo sapiens OX=9606 GN=ANKHD1 PE=1 SV=1	1662
	P13667|PDIA4_HUMAN	245.59	22	11	11	72933	Protein disulfide-isomerase A4 OS=Homo sapiens OX=9606 GN=PDIA4 PE=1 SV=2
	P55327-2|TPD52_HUMAN	245.51	66	8	8	19863	Isoform 2 of Tumor protein D52 OS=Homo sapiens OX=9606 GN=TPD52	161, 187
	Q9Y5A9|YTHD2_HUMAN	245.51	20	11	7	62334	YTH domain-containing family protein 2 OS=Homo sapiens OX=9606 GN=YTHDF2 PE=1 SV=2
	Q9NQW6|ANLN_HUMAN	245.48	10	9	9	124199	Anillin OS=Homo sapiens OX=9606 GN=ANLN PE=1 SV=2	237
	Q9Y617|SERC_HUMAN	245.19	37	12	12	40423	Phosphoserine aminotransferase OS=Homo sapiens OX=9606 GN=PSAT1 PE=1 SV=2
	P18615|NELFE_HUMAN	245.06	26	8	8	43240	Negative elongation factor E OS=Homo sapiens OX=9606 GN=NELFE PE=1 SV=3
	P29692-2|EF1D_HUMAN	244.67	16	8	7	71408	Isoform 2 of Elongation factor 1-delta OS=Homo sapiens OX=9606 GN=EEF1D
	P26368-2|U2AF2_HUMAN	244.31	27	8	8	53121	Isoform 2 of Splicing factor U2AF 65 kDa subunit OS=Homo sapiens OX=9606 GN=U2AF2
	Q5T8P6-2|RBM26_HUMAN	243.85	12	12	10	111024	Isoform 2 of RNA-binding protein 26 OS=Homo sapiens OX=9606 GN=RBM26
	Q8N3X1|FNBP4_HUMAN	243.78	10	9	9	110266	Formin-binding protein 4 OS=Homo sapiens OX=9606 GN=FNBP4 PE=1 SV=3
	Q16186|ADRM1_HUMAN	243.16	20	9	9	42153	Proteasomal ubiquitin receptor ADRM1 OS=Homo sapiens OX=9606 GN=ADRM1 PE=1 SV=2
	Q9UPT8|ZC3H4_HUMAN	242.77	9	7	7	140256	Zinc finger CCCH domain-containing protein 4 OS=Homo sapiens OX=9606 GN=ZC3H4 PE=1 SV=3
	P06744|G6PI_HUMAN	242.67	25	12	11	63147	Glucose-6-phosphate isomerase OS=Homo sapiens OX=9606 GN=GPI PE=1 SV=4
	Q9UJZ1|STML2_HUMAN	242.57	36	9	9	38534	Stomatin-like protein 2 mitochondrial OS=Homo sapiens OX=9606 GN=STOML2 PE=1 SV=1
	P52597|HNRPF_HUMAN	242.52	27	8	6	45672	Heterogeneous nuclear ribonucleoprotein F OS=Homo sapiens OX=9606 GN=HNRNPF PE=1 SV=3
	O94925-3|GLSK_HUMAN	242.35	19	8	8	65460	Isoform 3 of Glutaminase kidney isoform mitochondrial OS=Homo sapiens OX=9606 GN=GLS
	P08758|ANXA5_HUMAN	242.14	39	10	10	35937	Annexin A5 OS=Homo sapiens OX=9606 GN=ANXA5 PE=1 SV=2
	P49006|MRP_HUMAN	242	57	6	6	19529	MARCKS-related protein OS=Homo sapiens OX=9606 GN=MARCKSL1 PE=1 SV=2	25, 77
	Q92900-2|RENT1_HUMAN	241.85	13	10	10	123036	Isoform 2 of Regulator of nonsense transcripts 1 OS=Homo sapiens OX=9606 GN=UPF1
	Q7Z3T8|ZFY16_HUMAN	241.59	12	11	11	168903	Zinc finger FYVE domain-containing protein 16 OS=Homo sapiens OX=9606 GN=ZFYVE16 PE=1 SV=3	855
	O14828|SCAM3_HUMAN	241.58	25	6	6	38287	Secretory carrier-associated membrane protein 3 OS=Homo sapiens OX=9606 GN=SCAMP3 PE=1 SV=3	74
	O95721|SNP29_HUMAN	241.43	42	9	9	28970	Synaptosomal-associated protein 29 OS=Homo sapiens OX=9606 GN=SNAP29 PE=1 SV=1	126
	Q9H0U4|RAB1B_HUMAN	240.91	50	8	2	22171	Ras-related protein Rab-1B OS=Homo sapiens OX=9606 GN=RAB1B PE=1 SV=1
	Q8TBA6|GOGA5_HUMAN	240.9	23	13	13	83024	Golgin subfamily A member 5 OS=Homo sapiens OX=9606 GN=GOLGA5 PE=1 SV=3
	Q9BUF5|TBB6_HUMAN	240.78	24	9	1	49857	Tubulin beta-6 chain OS=Homo sapiens OX=9606 GN=TUBB6 PE=1 SV=1
	Q9BVG4|PBDC1_HUMAN	240.37	39	9	9	26057	Protein PBDC1 OS=Homo sapiens OX=9606 GN=PBDC1 PE=1 SV=1
	Q9BWF3|RBM4_HUMAN	240.32	29	9	7	40314	RNA-binding protein 4 OS=Homo sapiens OX=9606 GN=RBM4 PE=1 SV=1
	P13804|ETFA_HUMAN	240.21	37	9	9	35080	Electron transfer flavoprotein subunit alpha mitochondrial OS=Homo sapiens OX=9606 GN=ETFA PE=1 SV=1
	Q9UQ80|PA2G4_HUMAN	240.2	34	12	12	43787	Proliferation-associated protein 2G4 OS=Homo sapiens OX=9606 GN=PA2G4 PE=1 SV=3
	P49411|EFTU_HUMAN	240.03	32	12	12	49542	Elongation factor Tu mitochondrial OS=Homo sapiens OX=9606 GN=TUFM PE=1 SV=2
	Q8WXI9|P66B_HUMAN	239.85	27	13	12	65261	Transcriptional repressor p66-beta OS=Homo sapiens OX=9606 GN=GATAD2B PE=1 SV=1	224, 498
	Q00587-2|BORG5_HUMAN	239.43	27	6	6	39686	Isoform 2 of Cdc42 effector protein 1 OS=Homo sapiens OX=9606 GN=CDC42EP1	30
	P13797|PLST_HUMAN	239.4	24	12	10	70811	Plastin-3 OS=Homo sapiens OX=9606 GN=PLS3 PE=1 SV=4	81
	Q9UHD8-7|SEPT9_HUMAN	239.27	21	10	10	63503	Isoform 7 of Septin-9 OS=Homo sapiens OX=9606 GN=SEPTIN9
	Q92615|LAR4B_HUMAN	239.18	19	12	11	80552	La-related protein 4B OS=Homo sapiens OX=9606 GN=LARP4B PE=1 SV=3
	P62241|RS8_HUMAN	239.08	46	8	8	24205	40S ribosomal protein S8 OS=Homo sapiens OX=9606 GN=RPS8 PE=1 SV=2
	P55795|HNRH2_HUMAN	238.86	22	7	2	49264	Heterogeneous nuclear ribonucleoprotein H2 OS=Homo sapiens OX=9606 GN=HNRNPH2 PE=1 SV=1
	Q14152-2|EIF3A_HUMAN	238.69	15	20	20	162636	Isoform 2 of Eukaryotic translation initiation factor 3 subunit A OS=Homo sapiens OX=9606 GN=EIF3A
	Q13148|TADBP_HUMAN	238.68	26	9	9	44740	TAR DNA-binding protein 43 OS=Homo sapiens OX=9606 GN=TARDBP PE=1 SV=1
	P09651-3|ROA1_HUMAN	238.59	42	10	8	29386	Isoform 2 of Heterogeneous nuclear ribonucleoprotein A1 OS=Homo sapiens OX=9606 GN=HNRNPA1	8
	Q05639|EF1A2_HUMAN	238.51	33	10	1	50470	Elongation factor 1-alpha 2 OS=Homo sapiens OX=9606 GN=EEF1A2 PE=1 SV=1
	Q9NP61|ARFG3_HUMAN	238.4	24	10	10	56928	ADP-ribosylation factor GTPase-activating protein 3 OS=Homo sapiens OX=9606 GN=ARFGAP3 PE=1 SV=1
	Q92804-2|RBP56_HUMAN	238.11	24	8	6	61558	Isoform Short of TATA-binding protein-associated factor 2N OS=Homo sapiens OX=9606 GN=TAF15
	Q6UN15-5|FIP1_HUMAN	237.22	18	8	1	65728	Isoform 5 of Pre-mRNA 3'-end-processing factor FIP1 OS=Homo sapiens OX=9606 GN=FIP1L1
	Q99816|TS101_HUMAN	236.94	33	12	12	43944	Tumor susceptibility gene 101 protein OS=Homo sapiens OX=9606 GN=TSG101 PE=1 SV=2
	P09960|LKHA4_HUMAN	236.46	18	8	8	69285	Leukotriene A-4 hydrolase OS=Homo sapiens OX=9606 GN=LTA4H PE=1 SV=2
	P36957|ODO2_HUMAN	236.3	21	8	8	48755	Dihydrolipoyllysine-residue succinyltransferase component of 2-oxoglutarate dehydrogenase complex mitochondrial OS=Homo sapiens OX=9606 GN=DLST PE=1 SV=4
	Q07021|C1QBP_HUMAN	236.28	26	5	5	31362	Complement component 1 Q subcomponent-binding protein mitochondrial OS=Homo sapiens OX=9606 GN=C1QBP PE=1 SV=1
	P85037|FOXK1_HUMAN	235.84	25	14	12	75457	Forkhead box protein K1 OS=Homo sapiens OX=9606 GN=FOXK1 PE=1 SV=1
	P30101|PDIA3_HUMAN	235.73	25	11	11	56782	Protein disulfide-isomerase A3 OS=Homo sapiens OX=9606 GN=PDIA3 PE=1 SV=4
	P31150|GDIA_HUMAN	235.37	30	8	5	50583	Rab GDP dissociation inhibitor alpha OS=Homo sapiens OX=9606 GN=GDI1 PE=1 SV=2
	P61981|1433G_HUMAN	235.32	44	12	6	28303	14-3-3 protein gamma OS=Homo sapiens OX=9606 GN=YWHAG PE=1 SV=2
	P42704|LPPRC_HUMAN	234.9	11	12	12	157904	Leucine-rich PPR motif-containing protein mitochondrial OS=Homo sapiens OX=9606 GN=LRPPRC PE=1 SV=3
	P33316-2|DUT_HUMAN	234.86	56	7	7	17748	Isoform 2 of Deoxyuridine 5'-triphosphate nucleotidohydrolase mitochondrial OS=Homo sapiens OX=9606 GN=DUT
	Q96C19|EFHD2_HUMAN	234.73	42	10	10	26697	EF-hand domain-containing protein D2 OS=Homo sapiens OX=9606 GN=EFHD2 PE=1 SV=1
	P07910-2|HNRPC_HUMAN	234.57	40	13	13	32338	Isoform C1 of Heterogeneous nuclear ribonucleoproteins C1/C2 OS=Homo sapiens OX=9606 GN=HNRNPC	187
	Q9NQC3|RTN4_HUMAN	234.27	12	8	8	129931	Reticulon-4 OS=Homo sapiens OX=9606 GN=RTN4 PE=1 SV=2
	Q5TDH0|DDI2_HUMAN	234.06	30	8	8	44523	Protein DDI1 homolog 2 OS=Homo sapiens OX=9606 GN=DDI2 PE=1 SV=1
	P22061|PIMT_HUMAN	233.93	54	10	10	24636	Protein-L-isoaspartate(D-aspartate) O-methyltransferase OS=Homo sapiens OX=9606 GN=PCMT1 PE=1 SV=4
	P30153|2AAA_HUMAN	233.93	22	10	10	65309	Serine/threonine-protein phosphatase 2A 65 kDa regulatory subunit A alpha isoform OS=Homo sapiens OX=9606 GN=PPP2R1A PE=1 SV=4
	P05388|RLA0_HUMAN	233.75	34	7	7	34274	60S acidic ribosomal protein P0 OS=Homo sapiens OX=9606 GN=RPLP0 PE=1 SV=1
	Q10567-3|AP1B1_HUMAN	233.33	15	13	7	103564	Isoform C of AP-1 complex subunit beta-1 OS=Homo sapiens OX=9606 GN=AP1B1
	Q9UNF1|MAGD2_HUMAN	233.22	26	10	10	64954	Melanoma-associated antigen D2 OS=Homo sapiens OX=9606 GN=MAGED2 PE=1 SV=2
	Q58FG0|HS905_HUMAN	232.87	16	8	1	38738	Putative heat shock protein HSP 90-alpha A5 OS=Homo sapiens OX=9606 GN=HSP90AA5P PE=2 SV=1
	Q05519-2|SRS11_HUMAN	231.96	17	6	6	53414	Isoform 2 of Serine/arginine-rich splicing factor 11 OS=Homo sapiens OX=9606 GN=SRSF11	211
	Q8WXA9-2|SREK1_HUMAN	231.38	18	8	8	71650	Isoform 2 of Splicing regulatory glutamine/lysine-rich protein 1 OS=Homo sapiens OX=9606 GN=SREK1
	Q8NEV1|CSK23_HUMAN	231.32	16	6	6	45220	Casein kinase II subunit alpha 3 OS=Homo sapiens OX=9606 GN=CSNK2A3 PE=1 SV=2
	Q9BYJ9|YTHD1_HUMAN	231.22	25	11	6	60874	YTH domain-containing family protein 1 OS=Homo sapiens OX=9606 GN=YTHDF1 PE=1 SV=1
	P52292|IMA1_HUMAN	231.16	22	8	8	57862	Importin subunit alpha-1 OS=Homo sapiens OX=9606 GN=KPNA2 PE=1 SV=1
	Q9NY65|TBA8_HUMAN	231.14	18	7	1	50094	Tubulin alpha-8 chain OS=Homo sapiens OX=9606 GN=TUBA8 PE=1 SV=1
	P32322|P5CR1_HUMAN	231.13	31	8	7	33361	Pyrroline-5-carboxylate reductase 1 mitochondrial OS=Homo sapiens OX=9606 GN=PYCR1 PE=1 SV=2	291, 307
	P49588|SYAC_HUMAN	230.98	10	7	7	106810	Alanine--tRNA ligase cytoplasmic OS=Homo sapiens OX=9606 GN=AARS PE=1 SV=2
	P09936|UCHL1_HUMAN	230.79	43	7	7	24824	Ubiquitin carboxyl-terminal hydrolase isozyme L1 OS=Homo sapiens OX=9606 GN=UCHL1 PE=1 SV=2
	P35658-2|NU214_HUMAN	230.6	9	9	9	212569	Isoform 2 of Nuclear pore complex protein Nup214 OS=Homo sapiens OX=9606 GN=NUP214
	P15927|RFA2_HUMAN	230.58	47	8	8	29247	Replication protein A 32 kDa subunit OS=Homo sapiens OX=9606 GN=RPA2 PE=1 SV=1
	Q09028-3|RBBP4_HUMAN	230.42	22	7	3	46158	Isoform 3 of Histone-binding protein RBBP4 OS=Homo sapiens OX=9606 GN=RBBP4
	Q96CX2|KCD12_HUMAN	230.02	28	7	7	35701	BTB/POZ domain-containing protein KCTD12 OS=Homo sapiens OX=9606 GN=KCTD12 PE=1 SV=1
	Q9H773|DCTP1_HUMAN	229.95	59	10	10	18681	dCTP pyrophosphatase 1 OS=Homo sapiens OX=9606 GN=DCTPP1 PE=1 SV=1
	P27540-2|ARNT_HUMAN	229.88	14	7	7	84948	Isoform 2 of Aryl hydrocarbon receptor nuclear translocator OS=Homo sapiens OX=9606 GN=ARNT
	Q14974|IMB1_HUMAN	229.81	19	12	12	97170	Importin subunit beta-1 OS=Homo sapiens OX=9606 GN=KPNB1 PE=1 SV=2
	P60900|PSA6_HUMAN	229.73	44	11	11	27399	Proteasome subunit alpha type-6 OS=Homo sapiens OX=9606 GN=PSMA6 PE=1 SV=1
	Q15056-2|IF4H_HUMAN	229.72	62	12	12	25200	Isoform Short of Eukaryotic translation initiation factor 4H OS=Homo sapiens OX=9606 GN=EIF4H
	P09429|HMGB1_HUMAN	228.47	39	9	8	24894	High mobility group protein B1 OS=Homo sapiens OX=9606 GN=HMGB1 PE=1 SV=3
	Q9Y3S1-2|WNK2_HUMAN	228.15	5	10	5	234946	Isoform 2 of Serine/threonine-protein kinase WNK2 OS=Homo sapiens OX=9606 GN=WNK2
	Q7Z3B4-3|NUP54_HUMAN	227.69	23	9	9	50776	Isoform 3 of Nucleoporin p54 OS=Homo sapiens OX=9606 GN=NUP54
	P30050|RL12_HUMAN	227.25	59	7	7	17819	60S ribosomal protein L12 OS=Homo sapiens OX=9606 GN=RPL12 PE=1 SV=1
	Q86XP3|DDX42_HUMAN	227.07	15	10	10	102975	ATP-dependent RNA helicase DDX42 OS=Homo sapiens OX=9606 GN=DDX42 PE=1 SV=1	686
	P16989|YBOX3_HUMAN	227.06	20	6	3	40090	Y-box-binding protein 3 OS=Homo sapiens OX=9606 GN=YBX3 PE=1 SV=4
	Q92598-2|HS105_HUMAN	226.71	10	7	5	92116	Isoform Beta of Heat shock protein 105 kDa OS=Homo sapiens OX=9606 GN=HSPH1
	Q13200|PSMD2_HUMAN	226.58	15	10	10	100200	26S proteasome non-ATPase regulatory subunit 2 OS=Homo sapiens OX=9606 GN=PSMD2 PE=1 SV=3
	Q8NBS9|TXND5_HUMAN	226.43	19	6	6	47629	Thioredoxin domain-containing protein 5 OS=Homo sapiens OX=9606 GN=TXNDC5 PE=1 SV=2
	Q5T1M5|FKB15_HUMAN	226.27	10	8	8	133630	FK506-binding protein 15 OS=Homo sapiens OX=9606 GN=FKBP15 PE=1 SV=2	334
	Q8WW12|PCNP_HUMAN	225.95	51	8	8	18925	PEST proteolytic signal-containing nuclear protein OS=Homo sapiens OX=9606 GN=PCNP PE=1 SV=2	81
	Q99460|PSMD1_HUMAN	225.9	12	8	8	105836	26S proteasome non-ATPase regulatory subunit 1 OS=Homo sapiens OX=9606 GN=PSMD1 PE=1 SV=2
	P35241|RADI_HUMAN	225.88	16	12	3	68564	Radixin OS=Homo sapiens OX=9606 GN=RDX PE=1 SV=1
	O43237|DC1L2_HUMAN	225.76	20	9	9	54099	Cytoplasmic dynein 1 light intermediate chain 2 OS=Homo sapiens OX=9606 GN=DYNC1LI2 PE=1 SV=1
	P07237|PDIA1_HUMAN	225.41	21	10	10	57116	Protein disulfide-isomerase OS=Homo sapiens OX=9606 GN=P4HB PE=1 SV=3
	Q12906-7|ILF3_HUMAN	225.31	16	11	11	95808	Isoform 7 of Interleukin enhancer-binding factor 3 OS=Homo sapiens OX=9606 GN=ILF3	806
	Q8N163|CCAR2_HUMAN	225.15	21	12	12	102902	Cell cycle and apoptosis regulator protein 2 OS=Homo sapiens OX=9606 GN=CCAR2 PE=1 SV=2
	P20339-2|RAB5A_HUMAN	225.11	50	7	4	22178	Isoform 2 of Ras-related protein Rab-5A OS=Homo sapiens OX=9606 GN=RAB5A
	Q9NYB9-2|ABI2_HUMAN	225	23	8	5	52446	Isoform 2 of Abl interactor 2 OS=Homo sapiens OX=9606 GN=ABI2
	Q8TCU4-3|ALMS1_HUMAN	224.48	5	13	13	425353	Isoform 3 of Alstrom syndrome protein 1 OS=Homo sapiens OX=9606 GN=ALMS1
	O43768-4|ENSA_HUMAN	224.44	66	10	10	15534	Isoform 4 of Alpha-endosulfine OS=Homo sapiens OX=9606 GN=ENSA
	P82909|RT36_HUMAN	224.29	70	6	6	11466	28S ribosomal protein S36 mitochondrial OS=Homo sapiens OX=9606 GN=MRPS36 PE=1 SV=2	57
	O00161|SNP23_HUMAN	224.14	54	8	8	23354	Synaptosomal-associated protein 23 OS=Homo sapiens OX=9606 GN=SNAP23 PE=1 SV=1	117
	P08865|RSSA_HUMAN	223.39	31	6	6	32854	40S ribosomal protein SA OS=Homo sapiens OX=9606 GN=RPSA PE=1 SV=4
	Q6ZSR9|YJ005_HUMAN	223.09	33	7	7	37976	Uncharacterized protein FLJ45252 OS=Homo sapiens OX=9606 PE=2 SV=2
	Q92917|GPKOW_HUMAN	223.06	27	7	7	52229	G-patch domain and KOW motifs-containing protein OS=Homo sapiens OX=9606 GN=GPKOW PE=1 SV=2
	Q9NZI8|IF2B1_HUMAN	222.99	18	8	7	63481	Insulin-like growth factor 2 mRNA-binding protein 1 OS=Homo sapiens OX=9606 GN=IGF2BP1 PE=1 SV=2
	Q9UBB4|ATX10_HUMAN	222.88	21	7	7	53489	Ataxin-10 OS=Homo sapiens OX=9606 GN=ATXN10 PE=1 SV=1
	P31946-2|1433B_HUMAN	222.67	36	10	2	27850	Isoform Short of 14-3-3 protein beta/alpha OS=Homo sapiens OX=9606 GN=YWHAB
	P98175-2|RBM10_HUMAN	221.68	11	8	8	103433	Isoform 2 of RNA-binding protein 10 OS=Homo sapiens OX=9606 GN=RBM10
	P30520|PURA2_HUMAN	221.53	22	8	8	50097	Adenylosuccinate synthetase isozyme 2 OS=Homo sapiens OX=9606 GN=ADSS2 PE=1 SV=3
	Q8IY67-2|RAVR1_HUMAN	221.5	17	7	7	77860	Isoform 2 of Ribonucleoprotein PTB-binding 1 OS=Homo sapiens OX=9606 GN=RAVER1
	O43524|FOXO3_HUMAN	221.46	15	6	5	71277	Forkhead box protein O3 OS=Homo sapiens OX=9606 GN=FOXO3 PE=1 SV=1
	P23193|TCEA1_HUMAN	221.31	30	8	8	33970	Transcription elongation factor A protein 1 OS=Homo sapiens OX=9606 GN=TCEA1 PE=1 SV=2
	P08708|RS17_HUMAN	221.1	57	7	7	15550	40S ribosomal protein S17 OS=Homo sapiens OX=9606 GN=RPS17 PE=1 SV=2
	Q6Y7W6-4|GGYF2_HUMAN	220.97	11	11	11	148635	Isoform 3 of GRB10-interacting GYF protein 2 OS=Homo sapiens OX=9606 GN=GIGYF2
	O60361|NDK8_HUMAN	220.9	66	8	1	15529	Putative nucleoside diphosphate kinase OS=Homo sapiens OX=9606 GN=NME2P1 PE=5 SV=1
	O75122|CLAP2_HUMAN	220.49	10	9	9	141063	CLIP-associating protein 2 OS=Homo sapiens OX=9606 GN=CLASP2 PE=1 SV=3	1033
	P61011|SRP54_HUMAN	220.13	23	9	9	55705	Signal recognition particle 54 kDa protein OS=Homo sapiens OX=9606 GN=SRP54 PE=1 SV=1
	Q9NRV9|HEBP1_HUMAN	219.86	46	6	6	21097	Heme-binding protein 1 OS=Homo sapiens OX=9606 GN=HEBP1 PE=1 SV=1
	Q9UQB8-3|BAIP2_HUMAN	219.62	29	12	12	56626	Isoform 3 of Brain-specific angiogenesis inhibitor 1-associated protein 2 OS=Homo sapiens OX=9606 GN=BAIAP2
	O14745|NHRF1_HUMAN	219.58	29	8	8	38868	Na(+)/H(+) exchange regulatory cofactor NHE-RF1 OS=Homo sapiens OX=9606 GN=SLC9A3R1 PE=1 SV=4
	Q9NRY5|F1142_HUMAN	218.94	26	8	8	55468	Protein FAM114A2 OS=Homo sapiens OX=9606 GN=FAM114A2 PE=1 SV=4
	O95628-8|CNOT4_HUMAN	218.88	18	8	8	70339	Isoform 8 of CCR4-NOT transcription complex subunit 4 OS=Homo sapiens OX=9606 GN=CNOT4
	Q15185-4|TEBP_HUMAN	218.58	48	6	6	16476	Isoform 4 of Prostaglandin E synthase 3 OS=Homo sapiens OX=9606 GN=PTGES3
	Q9H3Q1|BORG4_HUMAN	218.49	21	5	5	37980	Cdc42 effector protein 4 OS=Homo sapiens OX=9606 GN=CDC42EP4 PE=1 SV=1
	Q15417|CNN3_HUMAN	218.3	36	10	9	36414	Calponin-3 OS=Homo sapiens OX=9606 GN=CNN3 PE=1 SV=1	205
	P37198|NUP62_HUMAN	218.26	14	7	7	53255	Nuclear pore glycoprotein p62 OS=Homo sapiens OX=9606 GN=NUP62 PE=1 SV=3
	P13861|KAP2_HUMAN	218.04	27	9	9	45518	cAMP-dependent protein kinase type II-alpha regulatory subunit OS=Homo sapiens OX=9606 GN=PRKAR2A PE=1 SV=2
	P61586|RHOA_HUMAN	217.96	44	7	7	21768	Transforming protein RhoA OS=Homo sapiens OX=9606 GN=RHOA PE=1 SV=1
	Q92879-2|CELF1_HUMAN	217.77	13	7	7	51546	Isoform 2 of CUGBP Elav-like family member 1 OS=Homo sapiens OX=9606 GN=CELF1
	P36578|RL4_HUMAN	217.75	21	7	7	47697	60S ribosomal protein L4 OS=Homo sapiens OX=9606 GN=RPL4 PE=1 SV=5
	Q8IZ21-3|PHAR4_HUMAN	217.73	18	10	10	76436	Isoform 3 of Phosphatase and actin regulator 4 OS=Homo sapiens OX=9606 GN=PHACTR4
	Q8NEZ2|VP37A_HUMAN	217.57	27	9	9	44314	Vacuolar protein sorting-associated protein 37A OS=Homo sapiens OX=9606 GN=VPS37A PE=1 SV=1	29
	Q9Y265|RUVB1_HUMAN	217.01	25	8	8	50228	RuvB-like 1 OS=Homo sapiens OX=9606 GN=RUVBL1 PE=1 SV=1
	Q5U5X0|LYRM7_HUMAN	216.77	41	6	6	11955	Complex III assembly factor LYRM7 OS=Homo sapiens OX=9606 GN=LYRM7 PE=1 SV=1
	P37840-2|SYUA_HUMAN	216.73	73	9	6	11372	Isoform 2-4 of Alpha-synuclein OS=Homo sapiens OX=9606 GN=SNCA
	O95232|LC7L3_HUMAN	216.26	21	9	9	51466	Luc7-like protein 3 OS=Homo sapiens OX=9606 GN=LUC7L3 PE=1 SV=2	187
	O00231|PSD11_HUMAN	215.98	25	9	9	47464	26S proteasome non-ATPase regulatory subunit 11 OS=Homo sapiens OX=9606 GN=PSMD11 PE=1 SV=3	32
	Q9UKV3-5|ACINU_HUMAN	215.77	9	8	8	150557	Isoform 4 of Apoptotic chromatin condensation inducer in the nucleus OS=Homo sapiens OX=9606 GN=ACIN1
	O75396|SC22B_HUMAN	215.75	38	7	7	24593	Vesicle-trafficking protein SEC22b OS=Homo sapiens OX=9606 GN=SEC22B PE=1 SV=4	169, 178
	P82979|SARNP_HUMAN	215.67	34	6	6	23671	SAP domain-containing ribonucleoprotein OS=Homo sapiens OX=9606 GN=SARNP PE=1 SV=3	119
	P25398|RS12_HUMAN	215.64	54	7	7	14515	40S ribosomal protein S12 OS=Homo sapiens OX=9606 GN=RPS12 PE=1 SV=3
	Q9BXK5|B2L13_HUMAN	215.64	27	8	8	52723	Bcl-2-like protein 13 OS=Homo sapiens OX=9606 GN=BCL2L13 PE=1 SV=1
	O14744|ANM5_HUMAN	215.61	14	7	7	72684	Protein arginine N-methyltransferase 5 OS=Homo sapiens OX=9606 GN=PRMT5 PE=1 SV=4
	P31930|QCR1_HUMAN	215.57	20	8	8	52646	Cytochrome b-c1 complex subunit 1 mitochondrial OS=Homo sapiens OX=9606 GN=UQCRC1 PE=1 SV=3
	O95757|HS74L_HUMAN	215.17	8	6	3	94512	Heat shock 70 kDa protein 4L OS=Homo sapiens OX=9606 GN=HSPA4L PE=1 SV=3
	P30086|PEBP1_HUMAN	215.16	40	5	5	21057	Phosphatidylethanolamine-binding protein 1 OS=Homo sapiens OX=9606 GN=PEBP1 PE=1 SV=3
	Q12981|SEC20_HUMAN	214.55	45	8	8	26132	Vesicle transport protein SEC20 OS=Homo sapiens OX=9606 GN=BNIP1 PE=1 SV=3
	Q9H3P2|NELFA_HUMAN	214.52	22	9	9	57277	Negative elongation factor A OS=Homo sapiens OX=9606 GN=NELFA PE=1 SV=3
	P61006|RAB8A_HUMAN	214.41	36	8	5	23668	Ras-related protein Rab-8A OS=Homo sapiens OX=9606 GN=RAB8A PE=1 SV=1
	Q15181|IPYR_HUMAN	214.36	26	5	4	32660	Inorganic pyrophosphatase OS=Homo sapiens OX=9606 GN=PPA1 PE=1 SV=2
	Q9Y5K6|CD2AP_HUMAN	214.26	21	11	11	71451	CD2-associated protein OS=Homo sapiens OX=9606 GN=CD2AP PE=1 SV=1
	Q6WKZ4|RFIP1_HUMAN	214.08	14	12	10	137167	Rab11 family-interacting protein 1 OS=Homo sapiens OX=9606 GN=RAB11FIP1 PE=1 SV=3
	Q16630-3|CPSF6_HUMAN	213.94	21	7	7	52326	Isoform 3 of Cleavage and polyadenylation specificity factor subunit 6 OS=Homo sapiens OX=9606 GN=CPSF6
	Q13011|ECH1_HUMAN	213.91	27	8	8	35816	Delta(3 5)-Delta(2 4)-dienoyl-CoA isomerase mitochondrial OS=Homo sapiens OX=9606 GN=ECH1 PE=1 SV=2
	O76003|GLRX3_HUMAN	213.78	27	8	8	37432	Glutaredoxin-3 OS=Homo sapiens OX=9606 GN=GLRX3 PE=1 SV=2
	Q9NZL4|HPBP1_HUMAN	213.71	23	6	6	39303	Hsp70-binding protein 1 OS=Homo sapiens OX=9606 GN=HSPBP1 PE=1 SV=2
	O95684-2|FR1OP_HUMAN	213.5	28	6	6	40907	Isoform 2 of FGFR1 oncogene partner OS=Homo sapiens OX=9606 GN=FGFR1OP	212
	P41091|IF2G_HUMAN	213.38	28	10	10	51110	Eukaryotic translation initiation factor 2 subunit 3 OS=Homo sapiens OX=9606 GN=EIF2S3 PE=1 SV=3
	P26038|MOES_HUMAN	213.3	23	12	5	67820	Moesin OS=Homo sapiens OX=9606 GN=MSN PE=1 SV=3
	O14545|TRAD1_HUMAN	212.9	17	8	8	64841	TRAF-type zinc finger domain-containing protein 1 OS=Homo sapiens OX=9606 GN=TRAFD1 PE=1 SV=1
	P05387|RLA2_HUMAN	212.43	70	5	5	11665	60S acidic ribosomal protein P2 OS=Homo sapiens OX=9606 GN=RPLP2 PE=1 SV=1
	Q01105-2|SET_HUMAN	212.3	29	6	6	32103	Isoform 2 of Protein SET OS=Homo sapiens OX=9606 GN=SET
	Q9UK76|JUPI1_HUMAN	212.23	65	5	5	16015	Jupiter microtubule associated homolog 1 OS=Homo sapiens OX=9606 GN=JPT1 PE=1 SV=3	18
	O15355|PPM1G_HUMAN	212.21	17	8	8	59272	Protein phosphatase 1G OS=Homo sapiens OX=9606 GN=PPM1G PE=1 SV=1	247
	Q86VP6|CAND1_HUMAN	211.8	13	14	14	136375	Cullin-associated NEDD8-dissociated protein 1 OS=Homo sapiens OX=9606 GN=CAND1 PE=1 SV=2
	Q14C86-4|GAPD1_HUMAN	211.53	7	7	7	160605	Isoform 4 of GTPase-activating protein and VPS9 domain-containing protein 1 OS=Homo sapiens OX=9606 GN=GAPVD1	927
	O75909|CCNK_HUMAN	211.48	15	5	5	64240	Cyclin-K OS=Homo sapiens OX=9606 GN=CCNK PE=1 SV=2
	P51659|DHB4_HUMAN	211.39	15	8	8	79686	Peroxisomal multifunctional enzyme type 2 OS=Homo sapiens OX=9606 GN=HSD17B4 PE=1 SV=3
	O95429-2|BAG4_HUMAN	211.36	22	7	7	45410	Isoform 2 of BAG family molecular chaperone regulator 4 OS=Homo sapiens OX=9606 GN=BAG4
	Q8N6H7|ARFG2_HUMAN	211.22	17	8	8	56720	ADP-ribosylation factor GTPase-activating protein 2 OS=Homo sapiens OX=9606 GN=ARFGAP2 PE=1 SV=1
	Q9UEE9|CFDP1_HUMAN	211.14	24	6	6	33593	Craniofacial development protein 1 OS=Homo sapiens OX=9606 GN=CFDP1 PE=1 SV=1	219
	P09972|ALDOC_HUMAN	211	20	7	1	39456	Fructose-bisphosphate aldolase C OS=Homo sapiens OX=9606 GN=ALDOC PE=1 SV=2
	Q53ET0|CRTC2_HUMAN	210.87	16	6	6	73302	CREB-regulated transcription coactivator 2 OS=Homo sapiens OX=9606 GN=CRTC2 PE=1 SV=2
	Q13153|PAK1_HUMAN	210.86	15	7	1	60647	Serine/threonine-protein kinase PAK 1 OS=Homo sapiens OX=9606 GN=PAK1 PE=1 SV=2
	P38159|RBMX_HUMAN	210.69	28	11	11	42332	RNA-binding motif protein X chromosome OS=Homo sapiens OX=9606 GN=RBMX PE=1 SV=3
	P55884|EIF3B_HUMAN	210.36	15	11	11	92482	Eukaryotic translation initiation factor 3 subunit B OS=Homo sapiens OX=9606 GN=EIF3B PE=1 SV=3
	P11586|C1TC_HUMAN	210.2	13	11	11	101559	C-1-tetrahydrofolate synthase cytoplasmic OS=Homo sapiens OX=9606 GN=MTHFD1 PE=1 SV=3
	P04181|OAT_HUMAN	210.14	23	6	6	48535	Ornithine aminotransferase mitochondrial OS=Homo sapiens OX=9606 GN=OAT PE=1 SV=1
	P51991|ROA3_HUMAN	209.93	19	7	6	39595	Heterogeneous nuclear ribonucleoprotein A3 OS=Homo sapiens OX=9606 GN=HNRNPA3 PE=1 SV=2
	O43432|IF4G3_HUMAN	209.77	5	8	2	176651	Eukaryotic translation initiation factor 4 gamma 3 OS=Homo sapiens OX=9606 GN=EIF4G3 PE=1 SV=2
	Q4VCS5|AMOT_HUMAN	209.42	8	8	8	118085	Angiomotin OS=Homo sapiens OX=9606 GN=AMOT PE=1 SV=1
	Q96I25|SPF45_HUMAN	209.35	24	8	8	44962	Splicing factor 45 OS=Homo sapiens OX=9606 GN=RBM17 PE=1 SV=1	269
	P06753-5|TPM3_HUMAN	209.3	35	8	6	28870	Isoform 5 of Tropomyosin alpha-3 chain OS=Homo sapiens OX=9606 GN=TPM3
	P23284|PPIB_HUMAN	209.25	41	9	9	23743	Peptidyl-prolyl cis-trans isomerase B OS=Homo sapiens OX=9606 GN=PPIB PE=1 SV=2
	P26196|DDX6_HUMAN	209.08	20	7	7	54417	Probable ATP-dependent RNA helicase DDX6 OS=Homo sapiens OX=9606 GN=DDX6 PE=1 SV=2
	Q9H2U2|IPYR2_HUMAN	208.76	20	6	5	37920	Inorganic pyrophosphatase 2 mitochondrial OS=Homo sapiens OX=9606 GN=PPA2 PE=1 SV=2
	Q13838|DX39B_HUMAN	208.72	19	8	8	48991	Spliceosome RNA helicase DDX39B OS=Homo sapiens OX=9606 GN=DDX39B PE=1 SV=1
	P46108|CRK_HUMAN	208.33	30	8	8	33831	Adapter molecule crk OS=Homo sapiens OX=9606 GN=CRK PE=1 SV=2
	Q13347|EIF3I_HUMAN	208.25	28	8	8	36502	Eukaryotic translation initiation factor 3 subunit I OS=Homo sapiens OX=9606 GN=EIF3I PE=1 SV=1
	Q7Z460|CLAP1_HUMAN	208.24	7	8	5	169450	CLIP-associating protein 1 OS=Homo sapiens OX=9606 GN=CLASP1 PE=1 SV=1
	Q99497|PARK7_HUMAN	207.94	51	9	9	19891	Protein/nucleic acid deglycase DJ-1 OS=Homo sapiens OX=9606 GN=PARK7 PE=1 SV=2
	Q9NVA2|SEP11_HUMAN	207.7	22	8	8	49398	Septin-11 OS=Homo sapiens OX=9606 GN=SEPTIN11 PE=1 SV=3	399, 418
	P00505|AATM_HUMAN	207.7	20	8	8	47518	Aspartate aminotransferase mitochondrial OS=Homo sapiens OX=9606 GN=GOT2 PE=1 SV=3
	Q8ND24|RN214_HUMAN	207.6	17	9	9	77667	RING finger protein 214 OS=Homo sapiens OX=9606 GN=RNF214 PE=1 SV=2
	P62979|RS27A_HUMAN	207.42	42	6	6	17965	Ubiquitin-40S ribosomal protein S27a OS=Homo sapiens OX=9606 GN=RPS27A PE=1 SV=2
	Q13642-1|FHL1_HUMAN	206.94	30	7	7	31895	Isoform 1 of Four and a half LIM domains protein 1 OS=Homo sapiens OX=9606 GN=FHL1
	Q99439|CNN2_HUMAN	206.88	31	8	7	33697	Calponin-2 OS=Homo sapiens OX=9606 GN=CNN2 PE=1 SV=4
	P00390-2|GSHR_HUMAN	206.57	31	9	9	51701	Isoform Cytoplasmic of Glutathione reductase mitochondrial OS=Homo sapiens OX=9606 GN=GSR
	Q9H7S9|ZN703_HUMAN	206.41	17	7	6	58222	Zinc finger protein 703 OS=Homo sapiens OX=9606 GN=ZNF703 PE=1 SV=1
	P61758|PFD3_HUMAN	206.13	42	7	7	22626	Prefoldin subunit 3 OS=Homo sapiens OX=9606 GN=VBP1 PE=1 SV=4
	P16949|STMN1_HUMAN	205.73	56	11	11	17302	Stathmin OS=Homo sapiens OX=9606 GN=STMN1 PE=1 SV=3	29, 95
	P26639|SYTC_HUMAN	205.72	22	13	13	83435	Threonine--tRNA ligase 1 cytoplasmic OS=Homo sapiens OX=9606 GN=TARS1 PE=1 SV=3
	Q15596|NCOA2_HUMAN	205.63	8	8	8	159156	Nuclear receptor coactivator 2 OS=Homo sapiens OX=9606 GN=NCOA2 PE=1 SV=2
	Q9H444|CHM4B_HUMAN	205.63	42	8	8	24950	Charged multivesicular body protein 4b OS=Homo sapiens OX=9606 GN=CHMP4B PE=1 SV=1
	Q96EP5-2|DAZP1_HUMAN	205.37	19	5	5	40530	Isoform 2 of DAZ-associated protein 1 OS=Homo sapiens OX=9606 GN=DAZAP1
	P45880-2|VDAC2_HUMAN	205.01	33	6	6	30412	Isoform 2 of Voltage-dependent anion-selective channel protein 2 OS=Homo sapiens OX=9606 GN=VDAC2
	Q96M27|PRRC1_HUMAN	204.72	26	7	7	46701	Protein PRRC1 OS=Homo sapiens OX=9606 GN=PRRC1 PE=1 SV=1
	Q8IZP0-2|ABI1_HUMAN	204.17	19	7	4	48678	Isoform 2 of Abl interactor 1 OS=Homo sapiens OX=9606 GN=ABI1
	P46379-2|BAG6_HUMAN	204.02	8	7	7	118693	Isoform 2 of Large proline-rich protein BAG6 OS=Homo sapiens OX=9606 GN=BAG6
	Q53EL6-2|PDCD4_HUMAN	203.77	21	7	7	50576	Isoform 2 of Programmed cell death protein 4 OS=Homo sapiens OX=9606 GN=PDCD4
	P63010|AP2B1_HUMAN	203.66	10	9	3	104553	AP-2 complex subunit beta OS=Homo sapiens OX=9606 GN=AP2B1 PE=1 SV=1
	P18754|RCC1_HUMAN	202.9	16	5	5	44969	Regulator of chromosome condensation OS=Homo sapiens OX=9606 GN=RCC1 PE=1 SV=1
	Q86X29-5|LSR_HUMAN	202.75	16	7	7	64053	Isoform 5 of Lipolysis-stimulated lipoprotein receptor OS=Homo sapiens OX=9606 GN=LSR	316
	P23526|SAHH_HUMAN	202.63	22	9	9	47716	Adenosylhomocysteinase OS=Homo sapiens OX=9606 GN=AHCY PE=1 SV=4
	Q14847|LASP1_HUMAN	202.46	36	9	8	29717	LIM and SH3 domain protein 1 OS=Homo sapiens OX=9606 GN=LASP1 PE=1 SV=2
	P78347-2|GTF2I_HUMAN	202	10	8	8	107970	Isoform 2 of General transcription factor II-I OS=Homo sapiens OX=9606 GN=GTF2I
	P40925|MDHC_HUMAN	201.65	32	9	9	36426	Malate dehydrogenase cytoplasmic OS=Homo sapiens OX=9606 GN=MDH1 PE=1 SV=4
	Q9Y230|RUVB2_HUMAN	201.56	17	6	6	51157	RuvB-like 2 OS=Homo sapiens OX=9606 GN=RUVBL2 PE=1 SV=3
	Q6PJT7-3|ZC3HE_HUMAN	201.24	22	8	8	65425	Isoform 3 of Zinc finger CCCH domain-containing protein 14 OS=Homo sapiens OX=9606 GN=ZC3H14
	Q8IYB5-3|SMAP1_HUMAN	201.18	19	7	7	47862	Isoform 3 of Stromal membrane-associated protein 1 OS=Homo sapiens OX=9606 GN=SMAP1
	P08243-2|ASNS_HUMAN	201.12	20	8	8	62168	Isoform 2 of Asparagine synthetase [glutamine-hydrolyzing] OS=Homo sapiens OX=9606 GN=ASNS	395
	Q9NP79|VTA1_HUMAN	201.06	16	5	5	33879	Vacuolar protein sorting-associated protein VTA1 homolog OS=Homo sapiens OX=9606 GN=VTA1 PE=1 SV=1
	P78318|IGBP1_HUMAN	200.75	19	5	5	39222	Immunoglobulin-binding protein 1 OS=Homo sapiens OX=9606 GN=IGBP1 PE=1 SV=1
	P57737-3|CORO7_HUMAN	200.57	7	6	6	114166	Isoform 3 of Coronin-7 OS=Homo sapiens OX=9606 GN=CORO7	1020
	O43809|CPSF5_HUMAN	200.53	30	8	8	26227	Cleavage and polyadenylation specificity factor subunit 5 OS=Homo sapiens OX=9606 GN=NUDT21 PE=1 SV=1
	O43707|ACTN4_HUMAN	200.18	9	7	3	104854	Alpha-actinin-4 OS=Homo sapiens OX=9606 GN=ACTN4 PE=1 SV=2
	P43487-2|RANG_HUMAN	199.73	50	8	8	23239	Isoform 2 of Ran-specific GTPase-activating protein OS=Homo sapiens OX=9606 GN=RANBP1	39, 189
	O75113|N4BP1_HUMAN	199.67	11	8	8	100379	NEDD4-binding protein 1 OS=Homo sapiens OX=9606 GN=N4BP1 PE=1 SV=4
	Q9UGP4|LIMD1_HUMAN	199.61	12	6	6	72190	LIM domain-containing protein 1 OS=Homo sapiens OX=9606 GN=LIMD1 PE=1 SV=1
	P05455|LA_HUMAN	199.59	31	11	11	46837	Lupus La protein OS=Homo sapiens OX=9606 GN=SSB PE=1 SV=2
	P06454-2|PTMA_HUMAN	199.57	24	6	6	12074	Isoform 2 of Prothymosin alpha OS=Homo sapiens OX=9606 GN=PTMA
	Q99426|TBCB_HUMAN	199.33	32	6	6	27326	Tubulin-folding cofactor B OS=Homo sapiens OX=9606 GN=TBCB PE=1 SV=2
	O00115-2|DNS2A_HUMAN	199.25	20	6	6	33615	Isoform 2 of Deoxyribonuclease-2-alpha OS=Homo sapiens OX=9606 GN=DNASE2
	Q92667|AKAP1_HUMAN	199.19	12	8	8	97342	A-kinase anchor protein 1 mitochondrial OS=Homo sapiens OX=9606 GN=AKAP1 PE=1 SV=1	153
	P31153|METK2_HUMAN	199.13	21	5	5	43661	S-adenosylmethionine synthase isoform type-2 OS=Homo sapiens OX=9606 GN=MAT2A PE=1 SV=1
	P40227|TCPZ_HUMAN	198.99	29	12	12	58024	T-complex protein 1 subunit zeta OS=Homo sapiens OX=9606 GN=CCT6A PE=1 SV=3
	P15923-2|TFE2_HUMAN	198.71	17	6	6	67265	Isoform E47 of Transcription factor E2-alpha OS=Homo sapiens OX=9606 GN=TCF3
	Q2KHR3|QSER1_HUMAN	198.45	5	6	6	189971	Glutamine and serine-rich protein 1 OS=Homo sapiens OX=9606 GN=QSER1 PE=1 SV=3
	Q12849|GRSF1_HUMAN	198.42	16	6	6	53126	G-rich sequence factor 1 OS=Homo sapiens OX=9606 GN=GRSF1 PE=1 SV=3
	O75937|DNJC8_HUMAN	197.85	36	9	9	29842	DnaJ homolog subfamily C member 8 OS=Homo sapiens OX=9606 GN=DNAJC8 PE=1 SV=2
	O75521-2|ECI2_HUMAN	197.43	19	5	5	39609	Isoform 2 of Enoyl-CoA delta isomerase 2 mitochondrial OS=Homo sapiens OX=9606 GN=ECI2
	Q01469|FABP5_HUMAN	197.39	41	4	4	15164	Fatty acid-binding protein 5 OS=Homo sapiens OX=9606 GN=FABP5 PE=1 SV=3
	Q13561|DCTN2_HUMAN	197.14	19	6	6	44231	Dynactin subunit 2 OS=Homo sapiens OX=9606 GN=DCTN2 PE=1 SV=4
	P21964-2|COMT_HUMAN	197.13	32	5	5	24449	Isoform Soluble of Catechol O-methyltransferase OS=Homo sapiens OX=9606 GN=COMT
	P52565|GDIR1_HUMAN	196.87	29	7	7	23207	Rho GDP-dissociation inhibitor 1 OS=Homo sapiens OX=9606 GN=ARHGDIA PE=1 SV=3
	Q15019|SEPT2_HUMAN	196.8	20	5	5	41487	Septin-2 OS=Homo sapiens OX=9606 GN=SEPTIN2 PE=1 SV=1
	P53990-2|IST1_HUMAN	196.75	36	8	8	36622	Isoform 2 of IST1 homolog OS=Homo sapiens OX=9606 GN=IST1
	Q8WU90|ZC3HF_HUMAN	196.71	17	6	6	48603	Zinc finger CCCH domain-containing protein 15 OS=Homo sapiens OX=9606 GN=ZC3H15 PE=1 SV=1
	P09496-2|CLCA_HUMAN	196.68	35	9	9	23662	Isoform Non-brain of Clathrin light chain A OS=Homo sapiens OX=9606 GN=CLTA
	Q04760-2|LGUL_HUMAN	196.61	38	8	8	19043	Isoform 2 of Lactoylglutathione lyase OS=Homo sapiens OX=9606 GN=GLO1
	Q96JM3|CHAP1_HUMAN	196.51	12	8	8	89099	Chromosome alignment-maintaining phosphoprotein 1 OS=Homo sapiens OX=9606 GN=CHAMP1 PE=1 SV=2
	P53367|ARFP1_HUMAN	196.43	23	8	1	41738	Arfaptin-1 OS=Homo sapiens OX=9606 GN=ARFIP1 PE=1 SV=2
	P00492|HPRT_HUMAN	196.42	37	7	7	24579	Hypoxanthine-guanine phosphoribosyltransferase OS=Homo sapiens OX=9606 GN=HPRT1 PE=1 SV=2
	P54578-2|UBP14_HUMAN	196.37	17	6	6	52386	Isoform 2 of Ubiquitin carboxyl-terminal hydrolase 14 OS=Homo sapiens OX=9606 GN=USP14
	Q53T59|H1BP3_HUMAN	195.84	17	4	4	42780	HCLS1-binding protein 3 OS=Homo sapiens OX=9606 GN=HS1BP3 PE=1 SV=1
	Q13190-2|STX5_HUMAN	195.83	28	6	6	34086	Isoform 2 of Syntaxin-5 OS=Homo sapiens OX=9606 GN=STX5	22
	Q32MZ4-3|LRRF1_HUMAN	195.74	13	8	6	82689	Isoform 3 of Leucine-rich repeat flightless-interacting protein 1 OS=Homo sapiens OX=9606 GN=LRRFIP1
	Q53GG5-2|PDLI3_HUMAN	195.66	39	7	7	34280	Isoform 2 of PDZ and LIM domain protein 3 OS=Homo sapiens OX=9606 GN=PDLIM3
	Q9BRP8-2|PYM1_HUMAN	195.55	30	4	4	22705	Isoform 2 of Partner of Y14 and mago OS=Homo sapiens OX=9606 GN=PYM1	55
	O95793-2|STAU1_HUMAN	195.35	29	12	12	54934	Isoform Short of Double-stranded RNA-binding protein Staufen homolog 1 OS=Homo sapiens OX=9606 GN=STAU1
	Q9NPE2|NGRN_HUMAN	195.25	32	8	8	32408	Neugrin OS=Homo sapiens OX=9606 GN=NGRN PE=1 SV=2
	P35269|T2FA_HUMAN	194.96	13	5	5	58241	General transcription factor IIF subunit 1 OS=Homo sapiens OX=9606 GN=GTF2F1 PE=1 SV=2
	Q12959-4|DLG1_HUMAN	194.94	10	6	6	99942	Isoform 4 of Disks large homolog 1 OS=Homo sapiens OX=9606 GN=DLG1
	Q16890-5|TPD53_HUMAN	194.82	63	8	8	19456	Isoform 5 of Tumor protein D53 OS=Homo sapiens OX=9606 GN=TPD52L1	94
	Q16181-2|SEPT7_HUMAN	194.72	23	7	6	50581	Isoform 2 of Septin-7 OS=Homo sapiens OX=9606 GN=SEPTIN7
	Q13185|CBX3_HUMAN	194.59	46	6	6	20811	Chromobox protein homolog 3 OS=Homo sapiens OX=9606 GN=CBX3 PE=1 SV=4
	P25685|DNJB1_HUMAN	194.52	26	7	7	38044	DnaJ homolog subfamily B member 1 OS=Homo sapiens OX=9606 GN=DNAJB1 PE=1 SV=4
	Q00013-2|EM55_HUMAN	194.19	18	6	6	49075	Isoform 2 of 55 kDa erythrocyte membrane protein OS=Homo sapiens OX=9606 GN=MPP1	217
	Q9UJY5-4|GGA1_HUMAN	193.96	24	9	8	61379	Isoform 4 of ADP-ribosylation factor-binding protein GGA1 OS=Homo sapiens OX=9606 GN=GGA1
	P61204|ARF3_HUMAN	193.54	48	7	4	20601	ADP-ribosylation factor 3 OS=Homo sapiens OX=9606 GN=ARF3 PE=1 SV=2
	O75821|EIF3G_HUMAN	193.29	24	6	6	35611	Eukaryotic translation initiation factor 3 subunit G OS=Homo sapiens OX=9606 GN=EIF3G PE=1 SV=2
	P53365-3|ARFP2_HUMAN	192.72	17	4	3	33782	Isoform 3 of Arfaptin-2 OS=Homo sapiens OX=9606 GN=ARFIP2
	O75347|TBCA_HUMAN	191.97	50	7	7	12855	Tubulin-specific chaperone A OS=Homo sapiens OX=9606 GN=TBCA PE=1 SV=3
	P55060-3|XPO2_HUMAN	191.94	8	7	7	107777	Isoform 3 of Exportin-2 OS=Homo sapiens OX=9606 GN=CSE1L
	P56537|IF6_HUMAN	191.53	34	5	5	26599	Eukaryotic translation initiation factor 6 OS=Homo sapiens OX=9606 GN=EIF6 PE=1 SV=1
	Q13596|SNX1_HUMAN	191.41	16	7	5	59070	Sorting nexin-1 OS=Homo sapiens OX=9606 GN=SNX1 PE=1 SV=3
	P61289|PSME3_HUMAN	191.27	30	7	7	29506	Proteasome activator complex subunit 3 OS=Homo sapiens OX=9606 GN=PSME3 PE=1 SV=1
	P31942-2|HNRH3_HUMAN	190.87	26	6	6	35239	Isoform 2 of Heterogeneous nuclear ribonucleoprotein H3 OS=Homo sapiens OX=9606 GN=HNRNPH3
	O76070|SYUG_HUMAN	190.85	68	6	5	13331	Gamma-synuclein OS=Homo sapiens OX=9606 GN=SNCG PE=1 SV=2	58
	Q8WVM8|SCFD1_HUMAN	190.76	14	6	6	72380	Sec1 family domain-containing protein 1 OS=Homo sapiens OX=9606 GN=SCFD1 PE=1 SV=4	423
	O60506-4|HNRPQ_HUMAN	190.62	16	7	5	58736	Isoform 4 of Heterogeneous nuclear ribonucleoprotein Q OS=Homo sapiens OX=9606 GN=SYNCRIP
	Q96A73-2|P33MX_HUMAN	190.52	36	8	8	31312	Isoform 2 of Putative monooxygenase p33MONOX OS=Homo sapiens OX=9606 GN=KIAA1191
	Q15084-3|PDIA6_HUMAN	190.28	21	6	6	47838	Isoform 3 of Protein disulfide-isomerase A6 OS=Homo sapiens OX=9606 GN=PDIA6
	P61081|UBC12_HUMAN	190	36	6	6	20900	NEDD8-conjugating enzyme Ubc12 OS=Homo sapiens OX=9606 GN=UBE2M PE=1 SV=1
	P37837|TALDO_HUMAN	189.72	28	9	9	37540	Transaldolase OS=Homo sapiens OX=9606 GN=TALDO1 PE=1 SV=2
	P28838-2|AMPL_HUMAN	189.69	21	7	7	52771	Isoform 2 of Cytosol aminopeptidase OS=Homo sapiens OX=9606 GN=LAP3
	P54920|SNAA_HUMAN	189.68	31	7	7	33233	Alpha-soluble NSF attachment protein OS=Homo sapiens OX=9606 GN=NAPA PE=1 SV=3
	O75886|STAM2_HUMAN	189.59	13	6	5	58164	Signal transducing adapter molecule 2 OS=Homo sapiens OX=9606 GN=STAM2 PE=1 SV=1	376
	Q9NXV6|CARF_HUMAN	189.46	13	5	5	61125	CDKN2A-interacting protein OS=Homo sapiens OX=9606 GN=CDKN2AIP PE=1 SV=3
	P43243|MATR3_HUMAN	189.37	11	6	6	94623	Matrin-3 OS=Homo sapiens OX=9606 GN=MATR3 PE=1 SV=2
	Q8NC96|NECP1_HUMAN	189.28	30	5	5	29737	Adaptin ear-binding coat-associated protein 1 OS=Homo sapiens OX=9606 GN=NECAP1 PE=1 SV=2
	P41250|GARS_HUMAN	189.26	11	6	6	83166	Glycine--tRNA ligase OS=Homo sapiens OX=9606 GN=GARS1 PE=1 SV=3
	Q9NQ29-2|LUC7L_HUMAN	189.23	19	5	1	38405	Isoform 2 of Putative RNA-binding protein Luc7-like 1 OS=Homo sapiens OX=9606 GN=LUC7L
	Q15120|PDK3_HUMAN	189.19	15	5	5	46939	[Pyruvate dehydrogenase (acetyl-transferring)] kinase isozyme 3 mitochondrial OS=Homo sapiens OX=9606 GN=PDK3 PE=1 SV=1
	Q9NZZ3|CHMP5_HUMAN	189.06	32	6	6	24571	Charged multivesicular body protein 5 OS=Homo sapiens OX=9606 GN=CHMP5 PE=1 SV=1	100
	Q9Y490|TLN1_HUMAN	188.77	6	9	9	269765	Talin-1 OS=Homo sapiens OX=9606 GN=TLN1 PE=1 SV=3
	O75534-2|CSDE1_HUMAN	188.06	13	8	8	85747	Isoform 2 of Cold shock domain-containing protein E1 OS=Homo sapiens OX=9606 GN=CSDE1
	Q9BVL2-2|NUP58_HUMAN	187.79	17	8	8	50210	Isoform 2 of Nucleoporin p58/p45 OS=Homo sapiens OX=9606 GN=NUP58
	Q9Y5X3|SNX5_HUMAN	187.74	20	7	7	46817	Sorting nexin-5 OS=Homo sapiens OX=9606 GN=SNX5 PE=1 SV=1
	Q14315-2|FLNC_HUMAN	187.7	4	6	2	287279	Isoform 2 of Filamin-C OS=Homo sapiens OX=9606 GN=FLNC
	Q9Y371|SHLB1_HUMAN	187.56	30	10	10	40796	Endophilin-B1 OS=Homo sapiens OX=9606 GN=SH3GLB1 PE=1 SV=1
	Q04323|UBXN1_HUMAN	187.28	28	6	6	33325	UBX domain-containing protein 1 OS=Homo sapiens OX=9606 GN=UBXN1 PE=1 SV=2	208
	O14562|UBFD1_HUMAN	187.1	23	6	6	33382	Ubiquitin domain-containing protein UBFD1 OS=Homo sapiens OX=9606 GN=UBFD1 PE=1 SV=2
	E9PAV3|NACAM_HUMAN	187.05	2	4	4	205419	Nascent polypeptide-associated complex subunit alpha muscle-specific form OS=Homo sapiens OX=9606 GN=NACA PE=1 SV=1
	Q9Y2Q9|RT28_HUMAN	186.65	42	7	7	20843	28S ribosomal protein S28 mitochondrial OS=Homo sapiens OX=9606 GN=MRPS28 PE=1 SV=1
	P35232|PHB_HUMAN	186.6	35	8	8	29804	Prohibitin OS=Homo sapiens OX=9606 GN=PHB PE=1 SV=1
	Q07666|KHDR1_HUMAN	186.5	23	7	7	48227	KH domain-containing RNA-binding signal transduction-associated protein 1 OS=Homo sapiens OX=9606 GN=KHDRBS1 PE=1 SV=1
	P0DP24|CALM2_HUMAN	186.31	38	5	5	16838	Calmodulin-2 OS=Homo sapiens OX=9606 GN=CALM2 PE=1 SV=1	95
	Q2TAL8|QRIC1_HUMAN	186.19	16	11	11	86436	Glutamine-rich protein 1 OS=Homo sapiens OX=9606 GN=QRICH1 PE=1 SV=1
	Q99504-2|EYA3_HUMAN	186.11	13	5	5	48652	Isoform 2 of Eyes absent homolog 3 OS=Homo sapiens OX=9606 GN=EYA3
	Q14141-2|SEPT6_HUMAN	186.08	17	7	2	48873	Isoform I of Septin-6 OS=Homo sapiens OX=9606 GN=SEPTIN6	420
	O15126|SCAM1_HUMAN	185.94	26	7	7	37920	Secretory carrier-associated membrane protein 1 OS=Homo sapiens OX=9606 GN=SCAMP1 PE=1 SV=2	334
	Q5H9R7-5|PP6R3_HUMAN	185.9	6	5	5	98485	Isoform 5 of Serine/threonine-protein phosphatase 6 regulatory subunit 3 OS=Homo sapiens OX=9606 GN=PPP6R3
	P22681|CBL_HUMAN	185.26	10	7	7	99633	E3 ubiquitin-protein ligase CBL OS=Homo sapiens OX=9606 GN=CBL PE=1 SV=2
	Q13428-2|TCOF_HUMAN	184.85	7	9	9	144314	Isoform 2 of Treacle protein OS=Homo sapiens OX=9606 GN=TCOF1
	P14868|SYDC_HUMAN	184.42	19	8	8	57136	Aspartate--tRNA ligase cytoplasmic OS=Homo sapiens OX=9606 GN=DARS PE=1 SV=2
	P62263|RS14_HUMAN	183.8	36	4	4	16273	40S ribosomal protein S14 OS=Homo sapiens OX=9606 GN=RPS14 PE=1 SV=3
	Q96ST3|SIN3A_HUMAN	183.78	7	7	7	145175	Paired amphipathic helix protein Sin3a OS=Homo sapiens OX=9606 GN=SIN3A PE=1 SV=2
	Q14166|TTL12_HUMAN	183.76	13	5	5	74404	Tubulin--tyrosine ligase-like protein 12 OS=Homo sapiens OX=9606 GN=TTLL12 PE=1 SV=2
	Q15233|NONO_HUMAN	183.58	15	7	6	54232	Non-POU domain-containing octamer-binding protein OS=Homo sapiens OX=9606 GN=NONO PE=1 SV=4
	Q9P2N5|RBM27_HUMAN	183.28	8	8	6	118718	RNA-binding protein 27 OS=Homo sapiens OX=9606 GN=RBM27 PE=1 SV=2
	Q9Y5K5-2|UCHL5_HUMAN	183.23	21	4	4	36079	Isoform 2 of Ubiquitin carboxyl-terminal hydrolase isozyme L5 OS=Homo sapiens OX=9606 GN=UCHL5
	Q96CT7|CC124_HUMAN	183.14	35	7	7	25835	Coiled-coil domain-containing protein 124 OS=Homo sapiens OX=9606 GN=CCDC124 PE=1 SV=1
	Q96K17|BT3L4_HUMAN	183.12	24	3	3	17271	Transcription factor BTF3 homolog 4 OS=Homo sapiens OX=9606 GN=BTF3L4 PE=1 SV=1
	Q13162|PRDX4_HUMAN	183.09	22	5	3	30540	Peroxiredoxin-4 OS=Homo sapiens OX=9606 GN=PRDX4 PE=1 SV=1
	P22392|NDKB_HUMAN	182.74	43	6	2	17298	Nucleoside diphosphate kinase B OS=Homo sapiens OX=9606 GN=NME2 PE=1 SV=1
	Q99459|CDC5L_HUMAN	182.68	10	6	6	92251	Cell division cycle 5-like protein OS=Homo sapiens OX=9606 GN=CDC5L PE=1 SV=2
	P13073|COX41_HUMAN	182.62	32	6	6	19577	Cytochrome c oxidase subunit 4 isoform 1 mitochondrial OS=Homo sapiens OX=9606 GN=COX4I1 PE=1 SV=1	159
	P31040-2|SDHA_HUMAN	182.52	12	5	5	67300	Isoform 2 of Succinate dehydrogenase [ubiquinone] flavoprotein subunit mitochondrial OS=Homo sapiens OX=9606 GN=SDHA
	P39023|RL3_HUMAN	182.46	17	6	6	46109	60S ribosomal protein L3 OS=Homo sapiens OX=9606 GN=RPL3 PE=1 SV=2
	P46060|RAGP1_HUMAN	182.29	10	5	5	63542	Ran GTPase-activating protein 1 OS=Homo sapiens OX=9606 GN=RANGAP1 PE=1 SV=1
	P54105|ICLN_HUMAN	182.01	32	4	4	26215	Methylosome subunit pICln OS=Homo sapiens OX=9606 GN=CLNS1A PE=1 SV=1
	O14980|XPO1_HUMAN	181.95	8	7	7	123386	Exportin-1 OS=Homo sapiens OX=9606 GN=XPO1 PE=1 SV=1
	Q8NFD5|ARI1B_HUMAN	181.81	4	6	4	236121	AT-rich interactive domain-containing protein 1B OS=Homo sapiens OX=9606 GN=ARID1B PE=1 SV=2
	O14979-3|HNRDL_HUMAN	181.68	25	5	3	27191	Isoform 3 of Heterogeneous nuclear ribonucleoprotein D-like OS=Homo sapiens OX=9606 GN=HNRNPDL
	Q9NUQ9|FA49B_HUMAN	181.49	23	6	6	36748	Protein FAM49B OS=Homo sapiens OX=9606 GN=FAM49B PE=1 SV=1
	Q8IXQ4|GPAM1_HUMAN	181.43	13	4	4	38142	GPALPP motifs-containing protein 1 OS=Homo sapiens OX=9606 GN=GPALPP1 PE=1 SV=1
	P23634-7|AT2B4_HUMAN	181.42	6	5	1	132594	Isoform ZB of Plasma membrane calcium-transporting ATPase 4 OS=Homo sapiens OX=9606 GN=ATP2B4
	P82650|RT22_HUMAN	181.21	26	9	9	41280	28S ribosomal protein S22 mitochondrial OS=Homo sapiens OX=9606 GN=MRPS22 PE=1 SV=1
	P39748|FEN1_HUMAN	181.17	18	4	4	42593	Flap endonuclease 1 OS=Homo sapiens OX=9606 GN=FEN1 PE=1 SV=1
	Q8N684-2|CPSF7_HUMAN	180.93	15	6	6	51096	Isoform 2 of Cleavage and polyadenylation specificity factor subunit 7 OS=Homo sapiens OX=9606 GN=CPSF7
	P10599|THIO_HUMAN	180.74	51	6	6	11737	Thioredoxin OS=Homo sapiens OX=9606 GN=TXN PE=1 SV=3
	Q8TAE8|G45IP_HUMAN	180.45	24	4	4	25384	Growth arrest and DNA damage-inducible proteins-interacting protein 1 OS=Homo sapiens OX=9606 GN=GADD45GIP1 PE=1 SV=1
	O75489|NDUS3_HUMAN	180.31	22	4	4	30242	NADH dehydrogenase [ubiquinone] iron-sulfur protein 3 mitochondrial OS=Homo sapiens OX=9606 GN=NDUFS3 PE=1 SV=1
	Q969T9|WBP2_HUMAN	179.74	20	5	5	28087	WW domain-binding protein 2 OS=Homo sapiens OX=9606 GN=WBP2 PE=1 SV=1
	P55209-3|NP1L1_HUMAN	179.42	22	5	4	37345	Isoform 3 of Nucleosome assembly protein 1-like 1 OS=Homo sapiens OX=9606 GN=NAP1L1
	O95433|AHSA1_HUMAN	179.36	19	5	5	38274	Activator of 90 kDa heat shock protein ATPase homolog 1 OS=Homo sapiens OX=9606 GN=AHSA1 PE=1 SV=1
	O00264|PGRC1_HUMAN	179.32	26	4	3	21671	Membrane-associated progesterone receptor component 1 OS=Homo sapiens OX=9606 GN=PGRMC1 PE=1 SV=3
	Q9BTT0|AN32E_HUMAN	179.25	18	4	4	30692	Acidic leucine-rich nuclear phosphoprotein 32 family member E OS=Homo sapiens OX=9606 GN=ANP32E PE=1 SV=1
	Q15758|AAAT_HUMAN	178.47	16	6	6	56598	Neutral amino acid transporter B(0) OS=Homo sapiens OX=9606 GN=SLC1A5 PE=1 SV=2	537
	Q6P2E9|EDC4_HUMAN	178.31	7	6	6	151661	Enhancer of mRNA-decapping protein 4 OS=Homo sapiens OX=9606 GN=EDC4 PE=1 SV=1
	O14818|PSA7_HUMAN	178.3	28	5	5	27887	Proteasome subunit alpha type-7 OS=Homo sapiens OX=9606 GN=PSMA7 PE=1 SV=1
	Q9NZ09-2|UBAP1_HUMAN	178.28	20	6	6	48247	Isoform 2 of Ubiquitin-associated protein 1 OS=Homo sapiens OX=9606 GN=UBAP1
	P40222|TXLNA_HUMAN	178.26	17	6	5	61891	Alpha-taxilin OS=Homo sapiens OX=9606 GN=TXLNA PE=1 SV=3
	P30084|ECHM_HUMAN	178.19	28	6	6	31387	Enoyl-CoA hydratase mitochondrial OS=Homo sapiens OX=9606 GN=ECHS1 PE=1 SV=4
	O00193|SMAP_HUMAN	178.03	21	2	2	20333	Small acidic protein OS=Homo sapiens OX=9606 GN=SMAP PE=1 SV=1	91
	P13929-2|ENOB_HUMAN	177.65	17	4	1	44115	Isoform 2 of Beta-enolase OS=Homo sapiens OX=9606 GN=ENO3
	P25440|BRD2_HUMAN	177.44	14	9	9	88061	Bromodomain-containing protein 2 OS=Homo sapiens OX=9606 GN=BRD2 PE=1 SV=2
	Q96EY1|DNJA3_HUMAN	177.19	14	5	5	52489	DnaJ homolog subfamily A member 3 mitochondrial OS=Homo sapiens OX=9606 GN=DNAJA3 PE=1 SV=2
	O95831-3|AIFM1_HUMAN	176.95	12	6	6	66295	Isoform 3 of Apoptosis-inducing factor 1 mitochondrial OS=Homo sapiens OX=9606 GN=AIFM1
	Q14694|UBP10_HUMAN	176.92	9	5	5	87134	Ubiquitin carboxyl-terminal hydrolase 10 OS=Homo sapiens OX=9606 GN=USP10 PE=1 SV=2	376
	P07858|CATB_HUMAN	176.81	14	4	4	37822	Cathepsin B OS=Homo sapiens OX=9606 GN=CTSB PE=1 SV=3
	P20340-2|RAB6A_HUMAN	176.77	31	5	4	23549	Isoform 2 of Ras-related protein Rab-6A OS=Homo sapiens OX=9606 GN=RAB6A
	O94788|AL1A2_HUMAN	176.65	20	7	6	56724	Retinal dehydrogenase 2 OS=Homo sapiens OX=9606 GN=ALDH1A2 PE=1 SV=3
	P61923|COPZ1_HUMAN	176.64	23	3	3	20198	Coatomer subunit zeta-1 OS=Homo sapiens OX=9606 GN=COPZ1 PE=1 SV=1	117
	O00299|CLIC1_HUMAN	176.39	23	4	4	26923	Chloride intracellular channel protein 1 OS=Homo sapiens OX=9606 GN=CLIC1 PE=1 SV=4
	O95747|OXSR1_HUMAN	176.25	16	5	5	58022	Serine/threonine-protein kinase OSR1 OS=Homo sapiens OX=9606 GN=OXSR1 PE=1 SV=1
	P04632|CPNS1_HUMAN	175.74	17	4	4	28316	Calpain small subunit 1 OS=Homo sapiens OX=9606 GN=CAPNS1 PE=1 SV=1
	P36873|PP1G_HUMAN	175.67	15	4	4	36984	Serine/threonine-protein phosphatase PP1-gamma catalytic subunit OS=Homo sapiens OX=9606 GN=PPP1CC PE=1 SV=1
	P54725-2|RD23A_HUMAN	175.58	23	5	3	33433	Isoform 2 of UV excision repair protein RAD23 homolog A OS=Homo sapiens OX=9606 GN=RAD23A
	Q9Y2D5-6|AKAP2_HUMAN	175.22	10	6	6	120630	Isoform 4 of A-kinase anchor protein 2 OS=Homo sapiens OX=9606 GN=AKAP2
	P20042|IF2B_HUMAN	175.18	14	4	4	38388	Eukaryotic translation initiation factor 2 subunit 2 OS=Homo sapiens OX=9606 GN=EIF2S2 PE=1 SV=2
	Q96I24|FUBP3_HUMAN	174.94	19	8	6	61640	Far upstream element-binding protein 3 OS=Homo sapiens OX=9606 GN=FUBP3 PE=1 SV=2
	O00512|BCL9_HUMAN	174.72	8	7	7	149289	B-cell CLL/lymphoma 9 protein OS=Homo sapiens OX=9606 GN=BCL9 PE=1 SV=4
	P17174|AATC_HUMAN	174.72	19	5	5	46248	Aspartate aminotransferase cytoplasmic OS=Homo sapiens OX=9606 GN=GOT1 PE=1 SV=3
	P08047-2|SP1_HUMAN	174.63	11	5	5	79892	Isoform 2 of Transcription factor Sp1 OS=Homo sapiens OX=9606 GN=SP1
	P50897|PPT1_HUMAN	174.58	21	5	5	34193	Palmitoyl-protein thioesterase 1 OS=Homo sapiens OX=9606 GN=PPT1 PE=1 SV=1
	Q8NCA5|FA98A_HUMAN	174.58	12	3	3	55272	Protein FAM98A OS=Homo sapiens OX=9606 GN=FAM98A PE=1 SV=2
	Q96B36|AKTS1_HUMAN	174.54	23	5	5	27383	Proline-rich AKT1 substrate 1 OS=Homo sapiens OX=9606 GN=AKT1S1 PE=1 SV=1
	Q6PKG0|LARP1_HUMAN	174.17	10	11	11	123510	La-related protein 1 OS=Homo sapiens OX=9606 GN=LARP1 PE=1 SV=2
	O75391|SPAG7_HUMAN	173.91	30	5	5	26034	Sperm-associated antigen 7 OS=Homo sapiens OX=9606 GN=SPAG7 PE=1 SV=2	164
	Q86UP2-2|KTN1_HUMAN	173.52	4	4	4	149610	Isoform 2 of Kinectin OS=Homo sapiens OX=9606 GN=KTN1
	A5YKK6-2|CNOT1_HUMAN	172.72	3	6	6	266379	Isoform 2 of CCR4-NOT transcription complex subunit 1 OS=Homo sapiens OX=9606 GN=CNOT1
	P61019|RAB2A_HUMAN	172.7	24	4	4	23546	Ras-related protein Rab-2A OS=Homo sapiens OX=9606 GN=RAB2A PE=1 SV=1
	Q01082|SPTB2_HUMAN	172.51	3	6	6	274608	Spectrin beta chain non-erythrocytic 1 OS=Homo sapiens OX=9606 GN=SPTBN1 PE=1 SV=2	2344
	P48739|PIPNB_HUMAN	172.51	27	6	6	31540	Phosphatidylinositol transfer protein beta isoform OS=Homo sapiens OX=9606 GN=PITPNB PE=1 SV=2
	Q7L592|NDUF7_HUMAN	172.51	16	5	5	49238	Protein arginine methyltransferase NDUFAF7 mitochondrial OS=Homo sapiens OX=9606 GN=NDUFAF7 PE=1 SV=1
	P28066|PSA5_HUMAN	172.33	29	5	5	26411	Proteasome subunit alpha type-5 OS=Homo sapiens OX=9606 GN=PSMA5 PE=1 SV=3
	P09622|DLDH_HUMAN	172.19	15	6	6	54177	Dihydrolipoyl dehydrogenase mitochondrial OS=Homo sapiens OX=9606 GN=DLD PE=1 SV=2
	Q96J01|THOC3_HUMAN	172.16	19	6	6	38772	THO complex subunit 3 OS=Homo sapiens OX=9606 GN=THOC3 PE=1 SV=1
	P35244|RFA3_HUMAN	172.06	45	4	4	13569	Replication protein A 14 kDa subunit OS=Homo sapiens OX=9606 GN=RPA3 PE=1 SV=1
	Q9BZZ5|API5_HUMAN	172.05	16	6	6	59005	Apoptosis inhibitor 5 OS=Homo sapiens OX=9606 GN=API5 PE=1 SV=3
	O60814|H2B1K_HUMAN	171.97	41	6	2	13890	Histone H2B type 1-K OS=Homo sapiens OX=9606 GN=H2BC12 PE=1 SV=3
	Q99733|NP1L4_HUMAN	171.76	18	6	5	42823	Nucleosome assembly protein 1-like 4 OS=Homo sapiens OX=9606 GN=NAP1L4 PE=1 SV=1
	Q9P2J5|SYLC_HUMAN	171.76	8	9	9	134466	Leucine--tRNA ligase cytoplasmic OS=Homo sapiens OX=9606 GN=LARS PE=1 SV=2
	P18124|RL7_HUMAN	171.14	19	4	4	29226	60S ribosomal protein L7 OS=Homo sapiens OX=9606 GN=RPL7 PE=1 SV=1
	Q02878|RL6_HUMAN	170.99	35	10	10	32728	60S ribosomal protein L6 OS=Homo sapiens OX=9606 GN=RPL6 PE=1 SV=3
	Q16740|CLPP_HUMAN	170.9	22	4	4	30180	ATP-dependent Clp protease proteolytic subunit mitochondrial OS=Homo sapiens OX=9606 GN=CLPP PE=1 SV=1
	P49915|GUAA_HUMAN	170.87	16	7	7	76716	GMP synthase [glutamine-hydrolyzing] OS=Homo sapiens OX=9606 GN=GMPS PE=1 SV=1
	Q13620-1|CUL4B_HUMAN	170.58	9	7	7	102299	Isoform 2 of Cullin-4B OS=Homo sapiens OX=9606 GN=CUL4B
	Q9Y580|RBM7_HUMAN	170.57	20	5	5	30504	RNA-binding protein 7 OS=Homo sapiens OX=9606 GN=RBM7 PE=1 SV=1
	O00410|IPO5_HUMAN	170.47	7	5	5	123630	Importin-5 OS=Homo sapiens OX=9606 GN=IPO5 PE=1 SV=4
	Q01167-2|FOXK2_HUMAN	170.45	14	7	5	64256	Isoform 2 of Forkhead box protein K2 OS=Homo sapiens OX=9606 GN=FOXK2
	O75717|WDHD1_HUMAN	170.4	4	3	3	125967	WD repeat and HMG-box DNA-binding protein 1 OS=Homo sapiens OX=9606 GN=WDHD1 PE=1 SV=1
	Q9BPW8|NIPS1_HUMAN	170.08	17	5	5	33310	Protein NipSnap homolog 1 OS=Homo sapiens OX=9606 GN=NIPSNAP1 PE=1 SV=1
	P49757-3|NUMB_HUMAN	169.94	9	4	3	69431	Isoform 3 of Protein numb homolog OS=Homo sapiens OX=9606 GN=NUMB	343
	O75381-2|PEX14_HUMAN	169.81	15	4	4	36702	Isoform 2 of Peroxisomal membrane protein PEX14 OS=Homo sapiens OX=9606 GN=PEX14
	P17980|PRS6A_HUMAN	169.81	20	5	5	49204	26S proteasome regulatory subunit 6A OS=Homo sapiens OX=9606 GN=PSMC3 PE=1 SV=3
	Q92905|CSN5_HUMAN	169.74	22	5	5	37579	COP9 signalosome complex subunit 5 OS=Homo sapiens OX=9606 GN=COPS5 PE=1 SV=4
	P40424-2|PBX1_HUMAN	169.23	13	2	2	38427	Isoform PBX1b of Pre-B-cell leukemia transcription factor 1 OS=Homo sapiens OX=9606 GN=PBX1
	Q6P3W7|SCYL2_HUMAN	169.23	9	6	6	103709	SCY1-like protein 2 OS=Homo sapiens OX=9606 GN=SCYL2 PE=1 SV=1
	Q9H425|CA198_HUMAN	169.06	22	6	6	36346	Uncharacterized protein C1orf198 OS=Homo sapiens OX=9606 GN=C1orf198 PE=1 SV=1
	Q9UKG1|DP13A_HUMAN	169.05	17	9	9	79664	DCC-interacting protein 13-alpha OS=Homo sapiens OX=9606 GN=APPL1 PE=1 SV=1
	Q15714|T22D1_HUMAN	168.83	7	7	5	109676	TSC22 domain family protein 1 OS=Homo sapiens OX=9606 GN=TSC22D1 PE=1 SV=3
	O60885|BRD4_HUMAN	168.63	6	7	7	152218	Bromodomain-containing protein 4 OS=Homo sapiens OX=9606 GN=BRD4 PE=1 SV=2
	P25788-2|PSA3_HUMAN	168.57	27	8	8	27647	Isoform 2 of Proteasome subunit alpha type-3 OS=Homo sapiens OX=9606 GN=PSMA3
	P12814-2|ACTN1_HUMAN	168.56	7	5	1	102709	Isoform 2 of Alpha-actinin-1 OS=Homo sapiens OX=9606 GN=ACTN1
	P15151-3|PVR_HUMAN	168.52	13	3	3	39305	Isoform Gamma of Poliovirus receptor OS=Homo sapiens OX=9606 GN=PVR
	O15042-2|SR140_HUMAN	168.43	8	7	7	118235	Isoform 2 of U2 snRNP-associated SURP motif-containing protein OS=Homo sapiens OX=9606 GN=U2SURP
	P28074|PSB5_HUMAN	168.26	19	4	4	28480	Proteasome subunit beta type-5 OS=Homo sapiens OX=9606 GN=PSMB5 PE=1 SV=3
	P46782|RS5_HUMAN	167.93	22	5	5	22876	40S ribosomal protein S5 OS=Homo sapiens OX=9606 GN=RPS5 PE=1 SV=4
	Q9GZY8-2|MFF_HUMAN	167.87	32	5	5	32973	Isoform 2 of Mitochondrial fission factor OS=Homo sapiens OX=9606 GN=MFF
	P25787|PSA2_HUMAN	167.83	33	5	5	25899	Proteasome subunit alpha type-2 OS=Homo sapiens OX=9606 GN=PSMA2 PE=1 SV=2
	O15372|EIF3H_HUMAN	167.54	15	5	5	39930	Eukaryotic translation initiation factor 3 subunit H OS=Homo sapiens OX=9606 GN=EIF3H PE=1 SV=1	5
	Q9BQ61|TRIR_HUMAN	167.49	39	5	5	18419	Telomerase RNA component interacting RNase OS=Homo sapiens OX=9606 GN=TRIR PE=1 SV=1
	P00918|CAH2_HUMAN	167.47	21	5	5	29246	Carbonic anhydrase 2 OS=Homo sapiens OX=9606 GN=CA2 PE=1 SV=2
	P62829|RL23_HUMAN	167.45	31	3	3	14865	60S ribosomal protein L23 OS=Homo sapiens OX=9606 GN=RPL23 PE=1 SV=1
	Q16629-3|SRSF7_HUMAN	167.04	33	4	3	15257	Isoform 3 of Serine/arginine-rich splicing factor 7 OS=Homo sapiens OX=9606 GN=SRSF7
	Q2M2I8|AAK1_HUMAN	167.04	8	5	5	103885	AP2-associated protein kinase 1 OS=Homo sapiens OX=9606 GN=AAK1 PE=1 SV=3
	Q9BYP7-2|WNK3_HUMAN	167.03	4	7	3	197328	Isoform 2 of Serine/threonine-protein kinase WNK3 OS=Homo sapiens OX=9606 GN=WNK3
	P84085|ARF5_HUMAN	166.71	29	4	1	20530	ADP-ribosylation factor 5 OS=Homo sapiens OX=9606 GN=ARF5 PE=1 SV=2
	O43290|SNUT1_HUMAN	166.63	8	4	4	90255	U4/U6.U5 tri-snRNP-associated protein 1 OS=Homo sapiens OX=9606 GN=SART1 PE=1 SV=1
	A4D1S0-2|KLRG2_HUMAN	166.44	15	3	3	32212	Isoform 2 of Killer cell lectin-like receptor subfamily G member 2 OS=Homo sapiens OX=9606 GN=KLRG2
	P62424|RL7A_HUMAN	166.43	31	7	7	29996	60S ribosomal protein L7a OS=Homo sapiens OX=9606 GN=RPL7A PE=1 SV=2
	O43242|PSMD3_HUMAN	165.93	12	7	7	60978	26S proteasome non-ATPase regulatory subunit 3 OS=Homo sapiens OX=9606 GN=PSMD3 PE=1 SV=2
	P52209-2|6PGD_HUMAN	165.82	15	4	4	51872	Isoform 2 of 6-phosphogluconate dehydrogenase decarboxylating OS=Homo sapiens OX=9606 GN=PGD
	Q00341|VIGLN_HUMAN	165.15	5	6	6	141455	Vigilin OS=Homo sapiens OX=9606 GN=HDLBP PE=1 SV=2
	Q9GZU8|PIP30_HUMAN	165.14	27	5	5	28912	PSME3-interacting protein OS=Homo sapiens OX=9606 GN=FAM192A PE=1 SV=1
	P25789|PSA4_HUMAN	165.11	28	5	5	29484	Proteasome subunit alpha type-4 OS=Homo sapiens OX=9606 GN=PSMA4 PE=1 SV=1
	Q9NZM3-2|ITSN2_HUMAN	165.11	6	6	6	190495	Isoform 2 of Intersectin-2 OS=Homo sapiens OX=9606 GN=ITSN2
	P56270-3|MAZ_HUMAN	165.09	13	6	6	46366	Isoform 3 of Myc-associated zinc finger protein OS=Homo sapiens OX=9606 GN=MAZ
	Q16881|TRXR1_HUMAN	164.39	9	4	4	70906	Thioredoxin reductase 1 cytoplasmic OS=Homo sapiens OX=9606 GN=TXNRD1 PE=1 SV=3
	Q2NKX8|ERC6L_HUMAN	163.71	5	5	5	141103	DNA excision repair protein ERCC-6-like OS=Homo sapiens OX=9606 GN=ERCC6L PE=1 SV=1	1156
	Q9BQA1|MEP50_HUMAN	163.61	23	5	5	36724	Methylosome protein 50 OS=Homo sapiens OX=9606 GN=WDR77 PE=1 SV=1
	O14737|PDCD5_HUMAN	163.5	44	5	5	14285	Programmed cell death protein 5 OS=Homo sapiens OX=9606 GN=PDCD5 PE=1 SV=3
	Q8NEY1-2|NAV1_HUMAN	163.47	6	8	8	201509	Isoform 2 of Neuron navigator 1 OS=Homo sapiens OX=9606 GN=NAV1
	Q15811-10|ITSN1_HUMAN	163.43	7	7	6	133560	Isoform 10 of Intersectin-1 OS=Homo sapiens OX=9606 GN=ITSN1
	P39687|AN32A_HUMAN	163.31	20	4	1	28585	Acidic leucine-rich nuclear phosphoprotein 32 family member A OS=Homo sapiens OX=9606 GN=ANP32A PE=1 SV=1
	Q92692-2|NECT2_HUMAN	163.31	11	4	4	51359	Isoform Alpha of Nectin-2 OS=Homo sapiens OX=9606 GN=NECTIN2
	Q8TCS8|PNPT1_HUMAN	163.29	12	7	7	85951	Polyribonucleotide nucleotidyltransferase 1 mitochondrial OS=Homo sapiens OX=9606 GN=PNPT1 PE=1 SV=2	750
	Q9Y3Q8|T22D4_HUMAN	163.29	19	5	3	41026	TSC22 domain family protein 4 OS=Homo sapiens OX=9606 GN=TSC22D4 PE=1 SV=2
	Q96B23-2|CR025_HUMAN	162.94	24	5	5	37048	Isoform 2 of Uncharacterized protein C18orf25 OS=Homo sapiens OX=9606 GN=C18orf25
	Q9BWU0|NADAP_HUMAN	162.91	11	6	6	88814	Kanadaptin OS=Homo sapiens OX=9606 GN=SLC4A1AP PE=1 SV=1
	O00303|EIF3F_HUMAN	162.88	14	5	5	37564	Eukaryotic translation initiation factor 3 subunit F OS=Homo sapiens OX=9606 GN=EIF3F PE=1 SV=1
	Q13442|HAP28_HUMAN	162.71	26	4	4	20630	28 kDa heat- and acid-stable phosphoprotein OS=Homo sapiens OX=9606 GN=PDAP1 PE=1 SV=1
	Q13363-2|CTBP1_HUMAN	162.64	16	5	5	46405	Isoform 2 of C-terminal-binding protein 1 OS=Homo sapiens OX=9606 GN=CTBP1
	P38606-2|VATA_HUMAN	162.46	10	4	4	64736	Isoform 2 of V-type proton ATPase catalytic subunit A OS=Homo sapiens OX=9606 GN=ATP6V1A
	Q5JSH3-4|WDR44_HUMAN	162.35	13	7	7	91272	Isoform 4 of WD repeat-containing protein 44 OS=Homo sapiens OX=9606 GN=WDR44	204
	P00491|PNPH_HUMAN	162.12	19	4	4	32118	Purine nucleoside phosphorylase OS=Homo sapiens OX=9606 GN=PNP PE=1 SV=2
	P61106|RAB14_HUMAN	162.06	24	4	3	23897	Ras-related protein Rab-14 OS=Homo sapiens OX=9606 GN=RAB14 PE=1 SV=4
	Q9BV68|RN126_HUMAN	161.79	15	4	4	33862	E3 ubiquitin-protein ligase RNF126 OS=Homo sapiens OX=9606 GN=RNF126 PE=1 SV=2
	Q9UNN5|FAF1_HUMAN	161.62	10	4	4	73954	FAS-associated factor 1 OS=Homo sapiens OX=9606 GN=FAF1 PE=1 SV=2
	Q9H6T3-2|RPAP3_HUMAN	161.61	9	4	4	71866	Isoform 2 of RNA polymerase II-associated protein 3 OS=Homo sapiens OX=9606 GN=RPAP3	515
	Q96PZ0|PUS7_HUMAN	161.49	10	6	6	75035	Pseudouridylate synthase 7 homolog OS=Homo sapiens OX=9606 GN=PUS7 PE=1 SV=2
	Q99536|VAT1_HUMAN	161.29	16	4	4	41920	Synaptic vesicle membrane protein VAT-1 homolog OS=Homo sapiens OX=9606 GN=VAT1 PE=1 SV=2	22
	Q8NI60|COQ8A_HUMAN	160.95	11	6	6	71950	Atypical kinase COQ8A mitochondrial OS=Homo sapiens OX=9606 GN=COQ8A PE=1 SV=1	194
	Q5PRF9|SMAG2_HUMAN	160.94	10	5	5	75484	Protein Smaug homolog 2 OS=Homo sapiens OX=9606 GN=SAMD4B PE=1 SV=1
	Q9Y450|HBS1L_HUMAN	160.75	11	5	5	75473	HBS1-like protein OS=Homo sapiens OX=9606 GN=HBS1L PE=1 SV=1	172
	C9JLW8|MCRI1_HUMAN	160.7	58	5	5	10920	Mapk-regulated corepressor-interacting protein 1 OS=Homo sapiens OX=9606 GN=MCRIP1 PE=1 SV=1
	O00764|PDXK_HUMAN	160.62	23	5	5	35102	Pyridoxal kinase OS=Homo sapiens OX=9606 GN=PDXK PE=1 SV=1
	P15121|ALDR_HUMAN	160.59	18	5	5	35853	Aldo-keto reductase family 1 member B1 OS=Homo sapiens OX=9606 GN=AKR1B1 PE=1 SV=3
	Q9NPI6-2|DCP1A_HUMAN	160.56	15	4	4	59330	Isoform 2 of mRNA-decapping enzyme 1A OS=Homo sapiens OX=9606 GN=DCP1A
	A0MZ66|SHOT1_HUMAN	160.53	13	7	7	71640	Shootin-1 OS=Homo sapiens OX=9606 GN=SHTN1 PE=1 SV=4
	O15127|SCAM2_HUMAN	160.44	14	3	3	36649	Secretory carrier-associated membrane protein 2 OS=Homo sapiens OX=9606 GN=SCAMP2 PE=1 SV=2
	P18206-2|VINC_HUMAN	160.41	7	6	6	116722	Isoform 1 of Vinculin OS=Homo sapiens OX=9606 GN=VCL
	P12268|IMDH2_HUMAN	160.25	16	6	6	55805	Inosine-5'-monophosphate dehydrogenase 2 OS=Homo sapiens OX=9606 GN=IMPDH2 PE=1 SV=2
	Q9UHR4|BI2L1_HUMAN	160.21	9	4	4	56883	Brain-specific angiogenesis inhibitor 1-associated protein 2-like protein 1 OS=Homo sapiens OX=9606 GN=BAIAP2L1 PE=1 SV=2
	Q8WUF5|IASPP_HUMAN	160.18	13	9	9	89091	RelA-associated inhibitor OS=Homo sapiens OX=9606 GN=PPP1R13L PE=1 SV=4
	P63000|RAC1_HUMAN	160.12	34	6	5	21450	Ras-related C3 botulinum toxin substrate 1 OS=Homo sapiens OX=9606 GN=RAC1 PE=1 SV=1
	Q14498-2|RBM39_HUMAN	160.11	15	7	7	58657	Isoform 2 of RNA-binding protein 39 OS=Homo sapiens OX=9606 GN=RBM39
	Q9H7Z7|PGES2_HUMAN	159.97	14	3	3	41943	Prostaglandin E synthase 2 OS=Homo sapiens OX=9606 GN=PTGES2 PE=1 SV=1
	O75947|ATP5H_HUMAN	159.85	44	5	5	18491	ATP synthase subunit d mitochondrial OS=Homo sapiens OX=9606 GN=ATP5PD PE=1 SV=3
	P13693|TCTP_HUMAN	159.54	26	5	5	19595	Translationally-controlled tumor protein OS=Homo sapiens OX=9606 GN=TPT1 PE=1 SV=1
	P16152|CBR1_HUMAN	159.53	17	4	4	30375	Carbonyl reductase [NADPH] 1 OS=Homo sapiens OX=9606 GN=CBR1 PE=1 SV=3
	Q15738|NSDHL_HUMAN	159.52	16	5	5	41900	Sterol-4-alpha-carboxylate 3-dehydrogenase decarboxylating OS=Homo sapiens OX=9606 GN=NSDHL PE=1 SV=2
	Q8IV08|PLD3_HUMAN	159.25	14	4	4	54705	Phospholipase D3 OS=Homo sapiens OX=9606 GN=PLD3 PE=1 SV=1
	Q9BX67|JAM3_HUMAN	158.93	14	4	4	35020	Junctional adhesion molecule C OS=Homo sapiens OX=9606 GN=JAM3 PE=1 SV=1
	Q12905|ILF2_HUMAN	158.86	22	4	4	43062	Interleukin enhancer-binding factor 2 OS=Homo sapiens OX=9606 GN=ILF2 PE=1 SV=2
	Q9UEY8-2|ADDG_HUMAN	158.75	13	6	6	75671	Isoform 1 of Gamma-adducin OS=Homo sapiens OX=9606 GN=ADD3
	P38919|IF4A3_HUMAN	158.7	20	7	5	46871	Eukaryotic initiation factor 4A-III OS=Homo sapiens OX=9606 GN=EIF4A3 PE=1 SV=4
	Q8N1G4|LRC47_HUMAN	158.67	8	3	3	63473	Leucine-rich repeat-containing protein 47 OS=Homo sapiens OX=9606 GN=LRRC47 PE=1 SV=1
	Q13586|STIM1_HUMAN	158.5	13	7	7	77423	Stromal interaction molecule 1 OS=Homo sapiens OX=9606 GN=STIM1 PE=1 SV=3
	O43776|SYNC_HUMAN	158.47	9	4	4	62943	Asparagine--tRNA ligase cytoplasmic OS=Homo sapiens OX=9606 GN=NARS1 PE=1 SV=1
	O96007|MOC2B_HUMAN	158.22	27	4	4	20944	Molybdopterin synthase catalytic subunit OS=Homo sapiens OX=9606 GN=MOCS2 PE=1 SV=1
	Q16625-4|OCLN_HUMAN	158.22	23	4	4	31602	Isoform 4 of Occludin OS=Homo sapiens OX=9606 GN=OCLN
	P10253|LYAG_HUMAN	158.02	6	5	5	105324	Lysosomal alpha-glucosidase OS=Homo sapiens OX=9606 GN=GAA PE=1 SV=4
	Q9NR46|SHLB2_HUMAN	158.02	14	7	7	43974	Endophilin-B2 OS=Homo sapiens OX=9606 GN=SH3GLB2 PE=1 SV=1
	Q9H3P7|GCP60_HUMAN	157.86	11	4	4	60593	Golgi resident protein GCP60 OS=Homo sapiens OX=9606 GN=ACBD3 PE=1 SV=4	322, 339
	Q9NZ52|GGA3_HUMAN	157.79	19	9	8	78315	ADP-ribosylation factor-binding protein GGA3 OS=Homo sapiens OX=9606 GN=GGA3 PE=1 SV=1
	Q9Y314|NOSIP_HUMAN	157.66	29	5	5	33172	Nitric oxide synthase-interacting protein OS=Homo sapiens OX=9606 GN=NOSIP PE=1 SV=1
	Q71RC2-3|LARP4_HUMAN	157.6	7	5	4	80468	Isoform 3 of La-related protein 4 OS=Homo sapiens OX=9606 GN=LARP4	579
	O75152|ZC11A_HUMAN	157.57	7	4	4	89131	Zinc finger CCCH domain-containing protein 11A OS=Homo sapiens OX=9606 GN=ZC3H11A PE=1 SV=3	635
	Q8IWD4|CC117_HUMAN	157.41	16	6	6	30541	Coiled-coil domain-containing protein 117 OS=Homo sapiens OX=9606 GN=CCDC117 PE=1 SV=1
	O60610-2|DIAP1_HUMAN	157.35	5	5	5	138907	Isoform 2 of Protein diaphanous homolog 1 OS=Homo sapiens OX=9606 GN=DIAPH1
	P48444|COPD_HUMAN	157.26	16	8	8	57210	Coatomer subunit delta OS=Homo sapiens OX=9606 GN=ARCN1 PE=1 SV=1	168
	P06899|H2B1J_HUMAN	157.22	40	5	1	13904	Histone H2B type 1-J OS=Homo sapiens OX=9606 GN=H2BC11 PE=1 SV=3
	P53396-2|ACLY_HUMAN	157.02	5	4	4	119772	Isoform 2 of ATP-citrate synthase OS=Homo sapiens OX=9606 GN=ACLY
	Q9UHV9|PFD2_HUMAN	156.86	30	4	4	16648	Prefoldin subunit 2 OS=Homo sapiens OX=9606 GN=PFDN2 PE=1 SV=1
	Q9H814|PHAX_HUMAN	156.78	15	5	5	44403	Phosphorylated adapter RNA export protein OS=Homo sapiens OX=9606 GN=PHAX PE=1 SV=1
	P49589|SYCC_HUMAN	156.77	8	5	5	85473	Cysteine--tRNA ligase cytoplasmic OS=Homo sapiens OX=9606 GN=CARS PE=1 SV=3
	P53992|SC24C_HUMAN	156.67	6	5	5	118325	Protein transport protein Sec24C OS=Homo sapiens OX=9606 GN=SEC24C PE=1 SV=3	319
	P04040|CATA_HUMAN	156.51	8	4	4	59756	Catalase OS=Homo sapiens OX=9606 GN=CAT PE=1 SV=3
	O43719|HTSF1_HUMAN	156.3	6	4	4	85853	HIV Tat-specific factor 1 OS=Homo sapiens OX=9606 GN=HTATSF1 PE=1 SV=1
	Q7L4I2-2|RSRC2_HUMAN	156.25	15	5	5	44879	Isoform 2 of Arginine/serine-rich coiled-coil protein 2 OS=Homo sapiens OX=9606 GN=RSRC2
	Q9NW68|BSDC1_HUMAN	156.24	20	5	5	47163	BSD domain-containing protein 1 OS=Homo sapiens OX=9606 GN=BSDC1 PE=1 SV=1
	O95202|LETM1_HUMAN	156.18	9	5	5	83354	Mitochondrial proton/calcium exchanger protein OS=Homo sapiens OX=9606 GN=LETM1 PE=1 SV=1	526
	Q5UIP0-2|RIF1_HUMAN	156.13	3	7	7	271688	Isoform 2 of Telomere-associated protein RIF1 OS=Homo sapiens OX=9606 GN=RIF1
	Q16527|CSRP2_HUMAN	156.09	27	4	4	20954	Cysteine and glycine-rich protein 2 OS=Homo sapiens OX=9606 GN=CSRP2 PE=1 SV=3
	O75874|IDHC_HUMAN	156.07	19	7	7	46659	Isocitrate dehydrogenase [NADP] cytoplasmic OS=Homo sapiens OX=9606 GN=IDH1 PE=1 SV=2
	P04818|TYSY_HUMAN	155.84	15	4	4	35716	Thymidylate synthase OS=Homo sapiens OX=9606 GN=TYMS PE=1 SV=3
	Q13813-3|SPTN1_HUMAN	155.82	3	6	6	282280	Isoform 3 of Spectrin alpha chain non-erythrocytic 1 OS=Homo sapiens OX=9606 GN=SPTAN1
	Q8IYB3-2|SRRM1_HUMAN	155.69	7	3	3	102126	Isoform 2 of Serine/arginine repetitive matrix protein 1 OS=Homo sapiens OX=9606 GN=SRRM1
	Q9NQG5|RPR1B_HUMAN	155.52	17	4	3	36900	Regulation of nuclear pre-mRNA domain-containing protein 1B OS=Homo sapiens OX=9606 GN=RPRD1B PE=1 SV=1
	O95999|BCL10_HUMAN	155.27	22	6	6	26252	B-cell lymphoma/leukemia 10 OS=Homo sapiens OX=9606 GN=BCL10 PE=1 SV=1
	P28161|GSTM2_HUMAN	155.23	26	4	3	25745	Glutathione S-transferase Mu 2 OS=Homo sapiens OX=9606 GN=GSTM2 PE=1 SV=2
	Q86V81|THOC4_HUMAN	155.23	15	3	3	26888	THO complex subunit 4 OS=Homo sapiens OX=9606 GN=ALYREF PE=1 SV=3
	P05141|ADT2_HUMAN	155.18	21	7	2	32852	ADP/ATP translocase 2 OS=Homo sapiens OX=9606 GN=SLC25A5 PE=1 SV=7
	O75157-2|T22D2_HUMAN	154.95	6	5	3	76392	Isoform 2 of TSC22 domain family protein 2 OS=Homo sapiens OX=9606 GN=TSC22D2
	Q9P032|NDUF4_HUMAN	154.92	25	4	4	20266	NADH dehydrogenase [ubiquinone] 1 alpha subcomplex assembly factor 4 OS=Homo sapiens OX=9606 GN=NDUFAF4 PE=1 SV=1
	Q96C36|P5CR2_HUMAN	154.88	19	5	4	33637	Pyrroline-5-carboxylate reductase 2 OS=Homo sapiens OX=9606 GN=PYCR2 PE=1 SV=1	291, 307
	Q15007|FL2D_HUMAN	154.79	11	3	3	44244	Pre-mRNA-splicing regulator WTAP OS=Homo sapiens OX=9606 GN=WTAP PE=1 SV=2
	Q96B01-2|R51A1_HUMAN	154.68	19	5	5	36757	Isoform 2 of RAD51-associated protein 1 OS=Homo sapiens OX=9606 GN=RAD51AP1
	Q92585|MAML1_HUMAN	154.32	7	3	3	108054	Mastermind-like protein 1 OS=Homo sapiens OX=9606 GN=MAML1 PE=1 SV=3
	Q9Y281-3|COF2_HUMAN	154.03	31	4	2	16917	Isoform 3 of Cofilin-2 OS=Homo sapiens OX=9606 GN=CFL2
	O60784-4|TOM1_HUMAN	154.01	12	4	4	50269	Isoform 4 of Target of Myb protein 1 OS=Homo sapiens OX=9606 GN=TOM1
	P23921|RIR1_HUMAN	153.95	6	4	4	90070	Ribonucleoside-diphosphate reductase large subunit OS=Homo sapiens OX=9606 GN=RRM1 PE=1 SV=1
	P47756-2|CAPZB_HUMAN	153.95	18	5	5	30629	Isoform 2 of F-actin-capping protein subunit beta OS=Homo sapiens OX=9606 GN=CAPZB
	P61247|RS3A_HUMAN	153.5	16	6	6	29945	40S ribosomal protein S3a OS=Homo sapiens OX=9606 GN=RPS3A PE=1 SV=2
	Q9NZN8|CNOT2_HUMAN	153.48	11	5	5	59738	CCR4-NOT transcription complex subunit 2 OS=Homo sapiens OX=9606 GN=CNOT2 PE=1 SV=1
	O60763|USO1_HUMAN	153.32	4	3	3	107895	General vesicular transport factor p115 OS=Homo sapiens OX=9606 GN=USO1 PE=1 SV=2
	Q00688|FKBP3_HUMAN	153.32	22	5	5	25177	Peptidyl-prolyl cis-trans isomerase FKBP3 OS=Homo sapiens OX=9606 GN=FKBP3 PE=1 SV=1
	Q96A26|F162A_HUMAN	153.23	23	3	3	17342	Protein FAM162A OS=Homo sapiens OX=9606 GN=FAM162A PE=1 SV=2	96
	Q14814-4|MEF2D_HUMAN	153.16	11	5	3	55114	Isoform MEF2DA0 of Myocyte-specific enhancer factor 2D OS=Homo sapiens OX=9606 GN=MEF2D
	Q8NFH3|NUP43_HUMAN	153.05	11	3	3	42151	Nucleoporin Nup43 OS=Homo sapiens OX=9606 GN=NUP43 PE=1 SV=1
	Q8TEX9|IPO4_HUMAN	152.6	8	6	6	118715	Importin-4 OS=Homo sapiens OX=9606 GN=IPO4 PE=1 SV=2
	Q9UPQ9|TNR6B_HUMAN	152.34	5	5	5	194001	Trinucleotide repeat-containing gene 6B protein OS=Homo sapiens OX=9606 GN=TNRC6B PE=1 SV=4
	P20618|PSB1_HUMAN	152.3	21	3	3	26489	Proteasome subunit beta type-1 OS=Homo sapiens OX=9606 GN=PSMB1 PE=1 SV=2
	Q5T440|CAF17_HUMAN	152.14	16	3	3	38155	Putative transferase CAF17 mitochondrial OS=Homo sapiens OX=9606 GN=IBA57 PE=1 SV=1
	Q92688-2|AN32B_HUMAN	152.07	24	4	1	22277	Isoform 2 of Acidic leucine-rich nuclear phosphoprotein 32 family member B OS=Homo sapiens OX=9606 GN=ANP32B
	Q9H9H4|VP37B_HUMAN	151.73	26	5	5	31307	Vacuolar protein sorting-associated protein 37B OS=Homo sapiens OX=9606 GN=VPS37B PE=1 SV=1
	P10636-2|TAU_HUMAN	151.62	21	5	5	36760	Isoform Fetal-tau of Microtubule-associated protein tau OS=Homo sapiens OX=9606 GN=MAPT
	Q9Y224|RTRAF_HUMAN	151.53	23	4	4	28068	RNA transcription translation and transport factor protein OS=Homo sapiens OX=9606 GN=RTRAF PE=1 SV=1
	Q9UMZ2-6|SYNRG_HUMAN	151.51	7	5	5	119509	Isoform 5 of Synergin gamma OS=Homo sapiens OX=9606 GN=SYNRG
	Q9Y570|PPME1_HUMAN	151.23	16	5	5	42315	Protein phosphatase methylesterase 1 OS=Homo sapiens OX=9606 GN=PPME1 PE=1 SV=3
	Q14686|NCOA6_HUMAN	151.22	4	7	7	219144	Nuclear receptor coactivator 6 OS=Homo sapiens OX=9606 GN=NCOA6 PE=1 SV=3
	P51003|PAPOA_HUMAN	151.17	10	4	4	82843	Poly(A) polymerase alpha OS=Homo sapiens OX=9606 GN=PAPOLA PE=1 SV=4	715
	P32969|RL9_HUMAN	151.11	35	4	4	21863	60S ribosomal protein L9 OS=Homo sapiens OX=9606 GN=RPL9 PE=1 SV=1
	Q15008|PSMD6_HUMAN	150.77	20	6	6	45531	26S proteasome non-ATPase regulatory subunit 6 OS=Homo sapiens OX=9606 GN=PSMD6 PE=1 SV=1
	O94842-3|TOX4_HUMAN	150.62	12	5	5	63595	Isoform 3 of TOX high mobility group box family member 4 OS=Homo sapiens OX=9606 GN=TOX4
	Q16531|DDB1_HUMAN	150.56	4	3	3	126968	DNA damage-binding protein 1 OS=Homo sapiens OX=9606 GN=DDB1 PE=1 SV=1
	P10768|ESTD_HUMAN	150.55	21	4	4	31463	S-formylglutathione hydrolase OS=Homo sapiens OX=9606 GN=ESD PE=1 SV=2
	Q86U28|ISCA2_HUMAN	150.54	30	4	4	16476	Iron-sulfur cluster assembly 2 homolog mitochondrial OS=Homo sapiens OX=9606 GN=ISCA2 PE=1 SV=2
	Q9UBT2|SAE2_HUMAN	150.46	13	6	6	71224	SUMO-activating enzyme subunit 2 OS=Homo sapiens OX=9606 GN=UBA2 PE=1 SV=2
	P52907|CAZA1_HUMAN	150.4	14	3	3	32923	F-actin-capping protein subunit alpha-1 OS=Homo sapiens OX=9606 GN=CAPZA1 PE=1 SV=3
	Q99576|T22D3_HUMAN	150.32	32	4	1	14810	TSC22 domain family protein 3 OS=Homo sapiens OX=9606 GN=TSC22D3 PE=1 SV=2
	Q15029-2|U5S1_HUMAN	150.05	5	4	3	105384	Isoform 2 of 116 kDa U5 small nuclear ribonucleoprotein component OS=Homo sapiens OX=9606 GN=EFTUD2
	Q4KMP7|TB10B_HUMAN	150.04	7	3	3	87199	TBC1 domain family member 10B OS=Homo sapiens OX=9606 GN=TBC1D10B PE=1 SV=3	719
	P60660|MYL6_HUMAN	149.94	27	4	4	16930	Myosin light polypeptide 6 OS=Homo sapiens OX=9606 GN=MYL6 PE=1 SV=2
	Q13443|ADAM9_HUMAN	149.92	9	5	5	90556	Disintegrin and metalloproteinase domain-containing protein 9 OS=Homo sapiens OX=9606 GN=ADAM9 PE=1 SV=1
	Q9NXR1|NDE1_HUMAN	149.84	20	5	5	37721	Nuclear distribution protein nudE homolog 1 OS=Homo sapiens OX=9606 GN=NDE1 PE=1 SV=3
	Q14061|COX17_HUMAN	149.78	57	3	3	6915	Cytochrome c oxidase copper chaperone OS=Homo sapiens OX=9606 GN=COX17 PE=1 SV=2
	P48382-2|RFX5_HUMAN	149.71	14	5	5	60513	Isoform 2 of DNA-binding protein RFX5 OS=Homo sapiens OX=9606 GN=RFX5
	Q96KB5|TOPK_HUMAN	149.54	21	4	4	36085	Lymphokine-activated killer T-cell-originated protein kinase OS=Homo sapiens OX=9606 GN=PBK PE=1 SV=3
	P60891|PRPS1_HUMAN	149.48	11	3	1	34834	Ribose-phosphate pyrophosphokinase 1 OS=Homo sapiens OX=9606 GN=PRPS1 PE=1 SV=2
	P11172|UMPS_HUMAN	149.34	12	4	4	52222	Uridine 5'-monophosphate synthase OS=Homo sapiens OX=9606 GN=UMPS PE=1 SV=1
	O00154-5|BACH_HUMAN	149.23	16	5	5	38991	Isoform 5 of Cytosolic acyl coenzyme A thioester hydrolase OS=Homo sapiens OX=9606 GN=ACOT7
	P62917|RL8_HUMAN	149.08	13	3	3	28025	60S ribosomal protein L8 OS=Homo sapiens OX=9606 GN=RPL8 PE=1 SV=2
	Q14151|SAFB2_HUMAN	149.06	7	4	1	107474	Scaffold attachment factor B2 OS=Homo sapiens OX=9606 GN=SAFB2 PE=1 SV=1
	P62316|SMD2_HUMAN	149	40	5	5	13527	Small nuclear ribonucleoprotein Sm D2 OS=Homo sapiens OX=9606 GN=SNRPD2 PE=1 SV=1
	Q9H1B7|I2BPL_HUMAN	148.86	6	4	2	82659	Probable E3 ubiquitin-protein ligase IRF2BPL OS=Homo sapiens OX=9606 GN=IRF2BPL PE=1 SV=1
	Q9Y2W2|WBP11_HUMAN	148.77	8	5	5	69998	WW domain-binding protein 11 OS=Homo sapiens OX=9606 GN=WBP11 PE=1 SV=1
	Q9Y5V3|MAGD1_HUMAN	148.67	5	2	2	86161	Melanoma-associated antigen D1 OS=Homo sapiens OX=9606 GN=MAGED1 PE=1 SV=3
	P20338|RAB4A_HUMAN	148.62	22	4	3	24390	Ras-related protein Rab-4A OS=Homo sapiens OX=9606 GN=RAB4A PE=1 SV=3
	Q12800-2|TFCP2_HUMAN	148.58	10	3	2	51308	Isoform 2 of Alpha-globin transcription factor CP2 OS=Homo sapiens OX=9606 GN=TFCP2
	O43583|DENR_HUMAN	148.55	23	4	4	22092	Density-regulated protein OS=Homo sapiens OX=9606 GN=DENR PE=1 SV=2
	O95297-2|MPZL1_HUMAN	148.51	14	3	3	28981	Isoform 2 of Myelin protein zero-like protein 1 OS=Homo sapiens OX=9606 GN=MPZL1	212
	Q15369|ELOC_HUMAN	148.42	32	3	3	12473	Elongin-C OS=Homo sapiens OX=9606 GN=ELOC PE=1 SV=1
	P24666|PPAC_HUMAN	148.36	20	3	3	18042	Low molecular weight phosphotyrosine protein phosphatase OS=Homo sapiens OX=9606 GN=ACP1 PE=1 SV=3
	Q9BXF6|RFIP5_HUMAN	148.32	10	4	4	70415	Rab11 family-interacting protein 5 OS=Homo sapiens OX=9606 GN=RAB11FIP5 PE=1 SV=1
	Q9Y263|PLAP_HUMAN	148.32	5	3	3	87157	Phospholipase A-2-activating protein OS=Homo sapiens OX=9606 GN=PLAA PE=1 SV=2
	P35249|RFC4_HUMAN	148.2	14	4	4	39682	Replication factor C subunit 4 OS=Homo sapiens OX=9606 GN=RFC4 PE=1 SV=2
	Q00613-2|HSF1_HUMAN	147.87	9	4	4	52881	Isoform Short of Heat shock factor protein 1 OS=Homo sapiens OX=9606 GN=HSF1
	P35998|PRS7_HUMAN	147.78	17	7	7	48634	26S proteasome regulatory subunit 7 OS=Homo sapiens OX=9606 GN=PSMC2 PE=1 SV=3
	Q15276|RABE1_HUMAN	147.67	12	7	7	99290	Rab GTPase-binding effector protein 1 OS=Homo sapiens OX=9606 GN=RABEP1 PE=1 SV=2
	O96000|NDUBA_HUMAN	147.64	27	4	4	20777	NADH dehydrogenase [ubiquinone] 1 beta subcomplex subunit 10 OS=Homo sapiens OX=9606 GN=NDUFB10 PE=1 SV=3
	P08670|VIME_HUMAN	147.59	10	5	2	53652	Vimentin OS=Homo sapiens OX=9606 GN=VIM PE=1 SV=4
	P10321-2|HLAC_HUMAN	147.42	14	3	1	36608	Isoform 2 of HLA class I histocompatibility antigen C alpha chain OS=Homo sapiens OX=9606 GN=HLA-C
	P49959|MRE11_HUMAN	147.42	6	4	4	80593	Double-strand break repair protein MRE11 OS=Homo sapiens OX=9606 GN=MRE11 PE=1 SV=3
	P56545|CTBP2_HUMAN	147.35	12	5	2	48945	C-terminal-binding protein 2 OS=Homo sapiens OX=9606 GN=CTBP2 PE=1 SV=1
	Q96S90|LYSM1_HUMAN	147.28	19	4	4	25003	LysM and putative peptidoglycan-binding domain-containing protein 1 OS=Homo sapiens OX=9606 GN=LYSMD1 PE=1 SV=1
	Q15382|RHEB_HUMAN	147.2	18	3	3	20497	GTP-binding protein Rheb OS=Homo sapiens OX=9606 GN=RHEB PE=1 SV=1
	P25205|MCM3_HUMAN	147.18	8	5	5	90981	DNA replication licensing factor MCM3 OS=Homo sapiens OX=9606 GN=MCM3 PE=1 SV=3
	Q8TAP9|MPLKI_HUMAN	147.05	19	2	2	19147	M-phase-specific PLK1-interacting protein OS=Homo sapiens OX=9606 GN=MPLKIP PE=1 SV=1
	Q8IX90|SKA3_HUMAN	146.93	13	4	4	46359	Spindle and kinetochore-associated protein 3 OS=Homo sapiens OX=9606 GN=SKA3 PE=1 SV=2	314
	Q96DG6|CMBL_HUMAN	146.87	21	6	6	28048	Carboxymethylenebutenolidase homolog OS=Homo sapiens OX=9606 GN=CMBL PE=1 SV=1
	Q9NUU7|DD19A_HUMAN	146.85	9	3	3	53975	ATP-dependent RNA helicase DDX19A OS=Homo sapiens OX=9606 GN=DDX19A PE=1 SV=1	46
	O75494-5|SRS10_HUMAN	146.74	30	4	4	20117	Isoform 5 of Serine/arginine-rich splicing factor 10 OS=Homo sapiens OX=9606 GN=SRSF10
	O00232|PSD12_HUMAN	146.47	11	4	4	52904	26S proteasome non-ATPase regulatory subunit 12 OS=Homo sapiens OX=9606 GN=PSMD12 PE=1 SV=3
	Q99613-2|EIF3C_HUMAN	146.43	6	5	5	104101	Isoform 2 of Eukaryotic translation initiation factor 3 subunit C OS=Homo sapiens OX=9606 GN=EIF3C
	Q14697|GANAB_HUMAN	146.24	4	4	4	106874	Neutral alpha-glucosidase AB OS=Homo sapiens OX=9606 GN=GANAB PE=1 SV=3
	Q9UKK9|NUDT5_HUMAN	146.08	21	5	5	24328	ADP-sugar pyrophosphatase OS=Homo sapiens OX=9606 GN=NUDT5 PE=1 SV=1
	P07814|SYEP_HUMAN	145.97	3	3	3	170590	Bifunctional glutamate/proline--tRNA ligase OS=Homo sapiens OX=9606 GN=EPRS PE=1 SV=5	824, 951
	P50225|ST1A1_HUMAN	145.93	14	4	4	34165	Sulfotransferase 1A1 OS=Homo sapiens OX=9606 GN=SULT1A1 PE=1 SV=3
	Q96GX5-2|GWL_HUMAN	145.86	6	4	3	92861	Isoform 2 of Serine/threonine-protein kinase greatwall OS=Homo sapiens OX=9606 GN=MASTL
	O43684-2|BUB3_HUMAN	145.59	14	4	4	36955	Isoform 2 of Mitotic checkpoint protein BUB3 OS=Homo sapiens OX=9606 GN=BUB3
	P11177-2|ODPB_HUMAN	145.57	16	4	4	37200	Isoform 2 of Pyruvate dehydrogenase E1 component subunit beta mitochondrial OS=Homo sapiens OX=9606 GN=PDHB
	Q15018|ABRX2_HUMAN	145.5	15	6	6	46901	BRISC complex subunit Abraxas 2 OS=Homo sapiens OX=9606 GN=ABRAXAS2 PE=1 SV=2
	P46926-2|GNPI1_HUMAN	145.48	23	4	4	24047	Isoform 2 of Glucosamine-6-phosphate isomerase 1 OS=Homo sapiens OX=9606 GN=GNPDA1
	Q14008-2|CKAP5_HUMAN	145.44	2	4	4	218524	Isoform 2 of Cytoskeleton-associated protein 5 OS=Homo sapiens OX=9606 GN=CKAP5
	O95081|AGFG2_HUMAN	145.18	16	7	5	48963	Arf-GAP domain and FG repeat-containing protein 2 OS=Homo sapiens OX=9606 GN=AGFG2 PE=1 SV=2
	Q86U90|YRDC_HUMAN	145.02	29	5	5	29328	YrdC domain-containing protein mitochondrial OS=Homo sapiens OX=9606 GN=YRDC PE=1 SV=1
	Q8NFC6|BD1L1_HUMAN	144.98	2	4	2	330467	Biorientation of chromosomes in cell division protein 1-like 1 OS=Homo sapiens OX=9606 GN=BOD1L1 PE=1 SV=2
	O94992|HEXI1_HUMAN	144.78	9	3	3	40623	Protein HEXIM1 OS=Homo sapiens OX=9606 GN=HEXIM1 PE=1 SV=1
	P35579|MYH9_HUMAN	144.64	3	5	5	226530	Myosin-9 OS=Homo sapiens OX=9606 GN=MYH9 PE=1 SV=4
	Q02078-3|MEF2A_HUMAN	144.33	8	3	1	53596	Isoform RSRFC4 of Myocyte-specific enhancer factor 2A OS=Homo sapiens OX=9606 GN=MEF2A
	Q6UX04|CWC27_HUMAN	144.19	8	3	3	53847	Spliceosome-associated protein CWC27 homolog OS=Homo sapiens OX=9606 GN=CWC27 PE=1 SV=1
	P63208|SKP1_HUMAN	144.03	38	4	4	18658	S-phase kinase-associated protein 1 OS=Homo sapiens OX=9606 GN=SKP1 PE=1 SV=2
	P63162|RSMN_HUMAN	143.95	15	4	4	24614	Small nuclear ribonucleoprotein-associated protein N OS=Homo sapiens OX=9606 GN=SNRPN PE=1 SV=1
	P84103-2|SRSF3_HUMAN	143.84	25	3	2	14203	Isoform 2 of Serine/arginine-rich splicing factor 3 OS=Homo sapiens OX=9606 GN=SRSF3
	P13489|RINI_HUMAN	143.73	11	4	4	49974	Ribonuclease inhibitor OS=Homo sapiens OX=9606 GN=RNH1 PE=1 SV=2
	Q8WXF1-2|PSPC1_HUMAN	143.7	21	6	6	45571	Isoform 2 of Paraspeckle component 1 OS=Homo sapiens OX=9606 GN=PSPC1
	Q9BRX5|PSF3_HUMAN	143.62	20	3	3	24535	DNA replication complex GINS protein PSF3 OS=Homo sapiens OX=9606 GN=GINS3 PE=1 SV=1
	O75208|COQ9_HUMAN	143.49	12	2	2	35509	Ubiquinone biosynthesis protein COQ9 mitochondrial OS=Homo sapiens OX=9606 GN=COQ9 PE=1 SV=1	70
	Q86Y37|CACL1_HUMAN	143.45	14	3	3	41064	CDK2-associated and cullin domain-containing protein 1 OS=Homo sapiens OX=9606 GN=CACUL1 PE=1 SV=1	121
	O43670-2|ZN207_HUMAN	143.41	7	3	3	49692	Isoform 2 of BUB3-interacting and GLEBS motif-containing protein ZNF207 OS=Homo sapiens OX=9606 GN=ZNF207
	Q8NE71|ABCF1_HUMAN	143.25	4	3	3	95926	ATP-binding cassette sub-family F member 1 OS=Homo sapiens OX=9606 GN=ABCF1 PE=1 SV=2
	Q96IK1|BOD1_HUMAN	143.24	30	4	2	19196	Biorientation of chromosomes in cell division protein 1 OS=Homo sapiens OX=9606 GN=BOD1 PE=1 SV=2
	P48556|PSMD8_HUMAN	143.22	16	6	6	39612	26S proteasome non-ATPase regulatory subunit 8 OS=Homo sapiens OX=9606 GN=PSMD8 PE=1 SV=2
	Q9H9B4|SFXN1_HUMAN	143.22	12	3	3	35619	Sideroflexin-1 OS=Homo sapiens OX=9606 GN=SFXN1 PE=1 SV=4
	P07947|YES_HUMAN	143.11	13	4	3	60801	Tyrosine-protein kinase Yes OS=Homo sapiens OX=9606 GN=YES1 PE=1 SV=3	48
	P82933|RT09_HUMAN	143.08	13	5	5	45835	28S ribosomal protein S9 mitochondrial OS=Homo sapiens OX=9606 GN=MRPS9 PE=1 SV=2
	Q9NZI7-4|UBIP1_HUMAN	142.9	7	2	1	56453	Isoform 2 of Upstream-binding protein 1 OS=Homo sapiens OX=9606 GN=UBP1
	Q9UQN3|CHM2B_HUMAN	142.88	22	6	6	23907	Charged multivesicular body protein 2b OS=Homo sapiens OX=9606 GN=CHMP2B PE=1 SV=1
	P46783|RS10_HUMAN	142.83	35	6	6	18898	40S ribosomal protein S10 OS=Homo sapiens OX=9606 GN=RPS10 PE=1 SV=1	139
	O75131|CPNE3_HUMAN	142.7	11	4	4	60131	Copine-3 OS=Homo sapiens OX=9606 GN=CPNE3 PE=1 SV=1
	P55010|IF5_HUMAN	142.39	14	5	5	49223	Eukaryotic translation initiation factor 5 OS=Homo sapiens OX=9606 GN=EIF5 PE=1 SV=2
	P14550|AK1A1_HUMAN	142.13	15	4	3	36573	Aldo-keto reductase family 1 member A1 OS=Homo sapiens OX=9606 GN=AKR1A1 PE=1 SV=3
	P21912|SDHB_HUMAN	142.11	12	3	3	31630	Succinate dehydrogenase [ubiquinone] iron-sulfur subunit mitochondrial OS=Homo sapiens OX=9606 GN=SDHB PE=1 SV=3
	Q9P258|RCC2_HUMAN	142.07	11	4	4	56085	Protein RCC2 OS=Homo sapiens OX=9606 GN=RCC2 PE=1 SV=2
	Q9BU61|NDUF3_HUMAN	141.99	19	3	3	20350	NADH dehydrogenase [ubiquinone] 1 alpha subcomplex assembly factor 3 OS=Homo sapiens OX=9606 GN=NDUFAF3 PE=1 SV=1
	Q9H3K6|BOLA2_HUMAN	141.9	29	2	2	10117	BolA-like protein 2 OS=Homo sapiens OX=9606 GN=BOLA2 PE=1 SV=1
	P26358|DNMT1_HUMAN	141.77	5	6	6	183164	DNA (cytosine-5)-methyltransferase 1 OS=Homo sapiens OX=9606 GN=DNMT1 PE=1 SV=2
	Q9P289-2|STK26_HUMAN	141.67	15	3	3	37770	Isoform 2 of Serine/threonine-protein kinase 26 OS=Homo sapiens OX=9606 GN=STK26
	O14639-2|ABLM1_HUMAN	141.66	7	5	5	81121	Isoform 2 of Actin-binding LIM protein 1 OS=Homo sapiens OX=9606 GN=ABLIM1
	Q92597|NDRG1_HUMAN	141.59	14	3	3	42835	Protein NDRG1 OS=Homo sapiens OX=9606 GN=NDRG1 PE=1 SV=1
	Q9UHR5-2|S30BP_HUMAN	141.41	18	5	5	32069	Isoform 2 of SAP30-binding protein OS=Homo sapiens OX=9606 GN=SAP30BP
	P11310|ACADM_HUMAN	141.37	11	4	4	46588	Medium-chain specific acyl-CoA dehydrogenase mitochondrial OS=Homo sapiens OX=9606 GN=ACADM PE=1 SV=1
	Q96EQ0|SGTB_HUMAN	141.23	18	4	4	33429	Small glutamine-rich tetratricopeptide repeat-containing protein beta OS=Homo sapiens OX=9606 GN=SGTB PE=1 SV=1
	P05386|RLA1_HUMAN	141.13	52	2	2	11514	60S acidic ribosomal protein P1 OS=Homo sapiens OX=9606 GN=RPLP1 PE=1 SV=1
	Q9Y3D9|RT23_HUMAN	140.98	22	4	4	21771	28S ribosomal protein S23 mitochondrial OS=Homo sapiens OX=9606 GN=MRPS23 PE=1 SV=2	150
	Q8NC56|LEMD2_HUMAN	140.94	15	7	7	56975	LEM domain-containing protein 2 OS=Homo sapiens OX=9606 GN=LEMD2 PE=1 SV=1
	P02786|TFR1_HUMAN	140.67	8	4	4	84871	Transferrin receptor protein 1 OS=Homo sapiens OX=9606 GN=TFRC PE=1 SV=2
	Q9H0E3|SP130_HUMAN	140.62	4	4	4	110324	Histone deacetylase complex subunit SAP130 OS=Homo sapiens OX=9606 GN=SAP130 PE=1 SV=1
	Q9UBQ5|EIF3K_HUMAN	140.4	18	3	3	25060	Eukaryotic translation initiation factor 3 subunit K OS=Homo sapiens OX=9606 GN=EIF3K PE=1 SV=1
	P55786|PSA_HUMAN	140.38	6	4	4	103276	Puromycin-sensitive aminopeptidase OS=Homo sapiens OX=9606 GN=NPEPPS PE=1 SV=2
	Q9UKA9|PTBP2_HUMAN	140.33	15	5	4	57491	Polypyrimidine tract-binding protein 2 OS=Homo sapiens OX=9606 GN=PTBP2 PE=1 SV=1
	Q9Y508-2|RN114_HUMAN	140.12	23	4	4	21004	Isoform 2 of E3 ubiquitin-protein ligase RNF114 OS=Homo sapiens OX=9606 GN=RNF114
	P50454|SERPH_HUMAN	139.9	8	3	3	46441	Serpin H1 OS=Homo sapiens OX=9606 GN=SERPINH1 PE=1 SV=2
	P41208|CETN2_HUMAN	139.85	21	3	3	19738	Centrin-2 OS=Homo sapiens OX=9606 GN=CETN2 PE=1 SV=1
	Q9NYF8-3|BCLF1_HUMAN	139.72	4	3	3	100232	Isoform 3 of Bcl-2-associated transcription factor 1 OS=Homo sapiens OX=9606 GN=BCLAF1
	Q9Y294|ASF1A_HUMAN	139.67	21	2	2	22969	Histone chaperone ASF1A OS=Homo sapiens OX=9606 GN=ASF1A PE=1 SV=1
	Q96RN5-3|MED15_HUMAN	139.63	10	4	4	75927	Isoform 3 of Mediator of RNA polymerase II transcription subunit 15 OS=Homo sapiens OX=9606 GN=MED15
	O95677-5|EYA4_HUMAN	139.59	8	4	4	63911	Isoform 5 of Eyes absent homolog 4 OS=Homo sapiens OX=9606 GN=EYA4
	P18085|ARF4_HUMAN	139.55	23	3	1	20511	ADP-ribosylation factor 4 OS=Homo sapiens OX=9606 GN=ARF4 PE=1 SV=3
	O14641|DVL2_HUMAN	139.53	7	4	4	78948	Segment polarity protein dishevelled homolog DVL-2 OS=Homo sapiens OX=9606 GN=DVL2 PE=1 SV=1
	P36542|ATPG_HUMAN	139.35	17	5	5	32996	ATP synthase subunit gamma mitochondrial OS=Homo sapiens OX=9606 GN=ATP5F1C PE=1 SV=1
	P26640|SYVC_HUMAN	139.23	5	5	5	140476	Valine--tRNA ligase OS=Homo sapiens OX=9606 GN=VARS PE=1 SV=4
	P61026|RAB10_HUMAN	139.13	20	4	3	22541	Ras-related protein Rab-10 OS=Homo sapiens OX=9606 GN=RAB10 PE=1 SV=1
	P61224-2|RAP1B_HUMAN	139.07	29	4	3	15356	Isoform 2 of Ras-related protein Rap-1b OS=Homo sapiens OX=9606 GN=RAP1B
	Q96ER9|MITOK_HUMAN	138.9	14	4	4	45811	Mitochondrial potassium channel OS=Homo sapiens OX=9606 GN=CCDC51 PE=1 SV=2
	Q9H2G2-2|SLK_HUMAN	138.82	5	5	5	138995	Isoform 2 of STE20-like serine/threonine-protein kinase OS=Homo sapiens OX=9606 GN=SLK
	P0CG12|DERPC_HUMAN	138.41	8	4	4	51391	Decreased expression in renal and prostate cancer protein OS=Homo sapiens OX=9606 GN=DERPC PE=1 SV=1
	Q02543|RL18A_HUMAN	138.15	22	4	4	20762	60S ribosomal protein L18a OS=Homo sapiens OX=9606 GN=RPL18A PE=1 SV=2
	Q96S66-4|CLCC1_HUMAN	137.99	16	3	3	39838	Isoform 4 of Chloride channel CLIC-like protein 1 OS=Homo sapiens OX=9606 GN=CLCC1
	Q99729-3|ROAA_HUMAN	137.95	11	3	2	30588	Isoform 3 of Heterogeneous nuclear ribonucleoprotein A/B OS=Homo sapiens OX=9606 GN=HNRNPAB
	Q9UJY4|GGA2_HUMAN	137.9	8	5	4	67150	ADP-ribosylation factor-binding protein GGA2 OS=Homo sapiens OX=9606 GN=GGA2 PE=1 SV=3
	Q9NR56|MBNL1_HUMAN	137.79	15	3	3	41817	Muscleblind-like protein 1 OS=Homo sapiens OX=9606 GN=MBNL1 PE=1 SV=2
	Q01650|LAT1_HUMAN	137.77	6	2	2	55010	Large neutral amino acids transporter small subunit 1 OS=Homo sapiens OX=9606 GN=SLC7A5 PE=1 SV=2
	Q9NR31|SAR1A_HUMAN	137.38	33	5	5	22367	GTP-binding protein SAR1a OS=Homo sapiens OX=9606 GN=SAR1A PE=1 SV=1
	O75880|SCO1_HUMAN	137.29	16	5	5	33814	Protein SCO1 homolog mitochondrial OS=Homo sapiens OX=9606 GN=SCO1 PE=1 SV=1
	P25325|THTM_HUMAN	137.12	23	4	4	33178	3-mercaptopyruvate sulfurtransferase OS=Homo sapiens OX=9606 GN=MPST PE=1 SV=3
	Q6IQ49-2|SDE2_HUMAN	137.04	15	5	5	48505	Isoform 2 of Replication stress response regulator SDE2 OS=Homo sapiens OX=9606 GN=SDE2
	P09661|RU2A_HUMAN	136.98	12	2	2	28416	U2 small nuclear ribonucleoprotein A' OS=Homo sapiens OX=9606 GN=SNRPA1 PE=1 SV=2
	Q9HAV7|GRPE1_HUMAN	136.89	23	5	5	24279	GrpE protein homolog 1 mitochondrial OS=Homo sapiens OX=9606 GN=GRPEL1 PE=1 SV=2	34
	Q14160|SCRIB_HUMAN	136.85	5	8	8	174884	Protein scribble homolog OS=Homo sapiens OX=9606 GN=SCRIB PE=1 SV=4
	P36405|ARL3_HUMAN	136.78	23	3	3	20456	ADP-ribosylation factor-like protein 3 OS=Homo sapiens OX=9606 GN=ARL3 PE=1 SV=2
	O60716-16|CTND1_HUMAN	136.74	6	3	3	95658	Isoform 2 of Catenin delta-1 OS=Homo sapiens OX=9606 GN=CTNND1	521
	O60256-3|KPRB_HUMAN	136.68	14	4	4	35548	Isoform 3 of Phosphoribosyl pyrophosphate synthase-associated protein 2 OS=Homo sapiens OX=9606 GN=PRPSAP2
	O43665-2|RGS10_HUMAN	136.58	23	3	3	19608	Isoform 2 of Regulator of G-protein signaling 10 OS=Homo sapiens OX=9606 GN=RGS10
	Q7Z4H7-3|HAUS6_HUMAN	136.47	7	5	5	104310	Isoform 3 of HAUS augmin-like complex subunit 6 OS=Homo sapiens OX=9606 GN=HAUS6
	O15400-2|STX7_HUMAN	136.01	14	3	3	27400	Isoform 2 of Syntaxin-7 OS=Homo sapiens OX=9606 GN=STX7
	Q15428|SF3A2_HUMAN	135.88	11	4	4	49256	Splicing factor 3A subunit 2 OS=Homo sapiens OX=9606 GN=SF3A2 PE=1 SV=2
	Q3ZCQ8|TIM50_HUMAN	135.86	10	3	3	39646	Mitochondrial import inner membrane translocase subunit TIM50 OS=Homo sapiens OX=9606 GN=TIMM50 PE=1 SV=2
	O43390|HNRPR_HUMAN	135.76	5	3	1	70943	Heterogeneous nuclear ribonucleoprotein R OS=Homo sapiens OX=9606 GN=HNRNPR PE=1 SV=1
	Q9BX66-10|SRBS1_HUMAN	135.71	9	4	4	90218	Isoform 10 of Sorbin and SH3 domain-containing protein 1 OS=Homo sapiens OX=9606 GN=SORBS1
	Q53H12|AGK_HUMAN	135.67	12	3	3	47137	Acylglycerol kinase mitochondrial OS=Homo sapiens OX=9606 GN=AGK PE=1 SV=2
	P18583-6|SON_HUMAN	135.62	3	5	5	228179	Isoform E of Protein SON OS=Homo sapiens OX=9606 GN=SON
	P33991|MCM4_HUMAN	135.49	9	5	5	96558	DNA replication licensing factor MCM4 OS=Homo sapiens OX=9606 GN=MCM4 PE=1 SV=5
	P27635|RL10_HUMAN	135.37	20	4	4	24604	60S ribosomal protein L10 OS=Homo sapiens OX=9606 GN=RPL10 PE=1 SV=4
	Q9UHB6|LIMA1_HUMAN	135.13	8	4	4	85226	LIM domain and actin-binding protein 1 OS=Homo sapiens OX=9606 GN=LIMA1 PE=1 SV=1
	O00560-2|SDCB1_HUMAN	134.82	26	4	4	32316	Isoform 2 of Syntenin-1 OS=Homo sapiens OX=9606 GN=SDCBP
	Q92793|CBP_HUMAN	134.54	2	4	4	265348	CREB-binding protein OS=Homo sapiens OX=9606 GN=CREBBP PE=1 SV=3
	O76031|CLPX_HUMAN	134.48	13	7	7	69224	ATP-dependent Clp protease ATP-binding subunit clpX-like mitochondrial OS=Homo sapiens OX=9606 GN=CLPX PE=1 SV=2	148
	Q07960|RHG01_HUMAN	134.48	11	3	3	50436	Rho GTPase-activating protein 1 OS=Homo sapiens OX=9606 GN=ARHGAP1 PE=1 SV=1
	Q9Y692-2|GMEB1_HUMAN	134.39	6	3	3	61327	Isoform 2 of Glucocorticoid modulatory element-binding protein 1 OS=Homo sapiens OX=9606 GN=GMEB1
	Q5TC12|ATPF1_HUMAN	133.92	18	4	4	36437	ATP synthase mitochondrial F1 complex assembly factor 1 OS=Homo sapiens OX=9606 GN=ATPAF1 PE=1 SV=1
	Q12874|SF3A3_HUMAN	133.89	10	4	4	58849	Splicing factor 3A subunit 3 OS=Homo sapiens OX=9606 GN=SF3A3 PE=1 SV=1
	P46777|RL5_HUMAN	133.84	13	4	4	34363	60S ribosomal protein L5 OS=Homo sapiens OX=9606 GN=RPL5 PE=1 SV=3
	Q13123|RED_HUMAN	133.71	14	5	5	65602	Protein Red OS=Homo sapiens OX=9606 GN=IK PE=1 SV=3
	Q04206-2|TF65_HUMAN	133.35	7	3	3	58807	Isoform 2 of Transcription factor p65 OS=Homo sapiens OX=9606 GN=RELA
	P29373|RABP2_HUMAN	133.31	30	4	4	15693	Cellular retinoic acid-binding protein 2 OS=Homo sapiens OX=9606 GN=CRABP2 PE=1 SV=2
	Q86Y56|DAAF5_HUMAN	133.02	5	3	3	93521	Dynein assembly factor 5 axonemal OS=Homo sapiens OX=9606 GN=DNAAF5 PE=1 SV=4
	Q70E73|RAPH1_HUMAN	132.91	6	4	4	135256	Ras-associated and pleckstrin homology domains-containing protein 1 OS=Homo sapiens OX=9606 GN=RAPH1 PE=1 SV=3	535
	P60866|RS20_HUMAN	132.89	25	3	3	13373	40S ribosomal protein S20 OS=Homo sapiens OX=9606 GN=RPS20 PE=1 SV=1
	Q14118|DAG1_HUMAN	132.87	6	3	3	97441	Dystroglycan OS=Homo sapiens OX=9606 GN=DAG1 PE=1 SV=2
	Q9Y676|RT18B_HUMAN	132.66	8	2	2	29396	28S ribosomal protein S18b mitochondrial OS=Homo sapiens OX=9606 GN=MRPS18B PE=1 SV=1
	Q9C0E8-2|LNP_HUMAN	132.64	10	4	4	47094	Isoform 2 of Endoplasmic reticulum junction formation protein lunapark OS=Homo sapiens OX=9606 GN=LNPK	76
	Q9NVZ3-3|NECP2_HUMAN	132.57	24	2	2	19419	Isoform 3 of Adaptin ear-binding coat-associated protein 2 OS=Homo sapiens OX=9606 GN=NECAP2
	O75663|TIPRL_HUMAN	132.55	12	3	3	31444	TIP41-like protein OS=Homo sapiens OX=9606 GN=TIPRL PE=1 SV=2
	P07954-2|FUMH_HUMAN	132.5	16	6	6	50213	Isoform Cytoplasmic of Fumarate hydratase mitochondrial OS=Homo sapiens OX=9606 GN=FH
	Q96DA6|TIM14_HUMAN	132.28	39	5	5	12499	Mitochondrial import inner membrane translocase subunit TIM14 OS=Homo sapiens OX=9606 GN=DNAJC19 PE=1 SV=3
	O75376|NCOR1_HUMAN	132.11	2	4	4	270207	Nuclear receptor corepressor 1 OS=Homo sapiens OX=9606 GN=NCOR1 PE=1 SV=2
	Q01813-2|PFKAP_HUMAN	132.1	5	3	3	85316	Isoform 2 of ATP-dependent 6-phosphofructokinase platelet type OS=Homo sapiens OX=9606 GN=PFKP
	Q86X55-1|CARM1_HUMAN	132.1	7	4	4	63460	Isoform 1 of Histone-arginine methyltransferase CARM1 OS=Homo sapiens OX=9606 GN=CARM1
	Q9BQP7|MGME1_HUMAN	132.02	14	5	5	39421	Mitochondrial genome maintenance exonuclease 1 OS=Homo sapiens OX=9606 GN=MGME1 PE=1 SV=1	84
	Q8NCF5|NF2IP_HUMAN	132.01	9	2	2	45817	NFATC2-interacting protein OS=Homo sapiens OX=9606 GN=NFATC2IP PE=1 SV=1
	P12694|ODBA_HUMAN	131.88	10	3	3	50471	2-oxoisovalerate dehydrogenase subunit alpha mitochondrial OS=Homo sapiens OX=9606 GN=BCKDHA PE=1 SV=2
	Q07020-2|RL18_HUMAN	131.82	23	3	3	18091	Isoform 2 of 60S ribosomal protein L18 OS=Homo sapiens OX=9606 GN=RPL18
	O95104-3|SCAF4_HUMAN	131.8	4	4	1	124014	Isoform 3 of SR-related and CTD-associated factor 4 OS=Homo sapiens OX=9606 GN=SCAF4
	Q9UNK0|STX8_HUMAN	131.45	21	3	3	26907	Syntaxin-8 OS=Homo sapiens OX=9606 GN=STX8 PE=1 SV=2
	P83731|RL24_HUMAN	131.32	25	4	4	17779	60S ribosomal protein L24 OS=Homo sapiens OX=9606 GN=RPL24 PE=1 SV=1
	P54252-5|ATX3_HUMAN	131.2	16	2	2	20633	Isoform 5 of Ataxin-3 OS=Homo sapiens OX=9606 GN=ATXN3
	O00425|IF2B3_HUMAN	130.91	6	3	1	63705	Insulin-like growth factor 2 mRNA-binding protein 3 OS=Homo sapiens OX=9606 GN=IGF2BP3 PE=1 SV=2
	A2A3N6|PIPSL_HUMAN	130.89	4	3	1	95048	Putative PIP5K1A and PSMD4-like protein OS=Homo sapiens OX=9606 GN=PIPSL PE=5 SV=1
	P52758|RIDA_HUMAN	130.79	31	3	3	14494	2-iminobutanoate/2-iminopropanoate deaminase OS=Homo sapiens OX=9606 GN=RIDA PE=1 SV=1
	Q15032-2|R3HD1_HUMAN	130.72	6	4	4	107706	Isoform 2 of R3H domain-containing protein 1 OS=Homo sapiens OX=9606 GN=R3HDM1
	P55196-1|AFAD_HUMAN	130.7	5	7	7	205604	Isoform 2 of Afadin OS=Homo sapiens OX=9606 GN=AFDN
	Q8WWK9-6|CKAP2_HUMAN	130.64	4	2	2	71195	Isoform 4 of Cytoskeleton-associated protein 2 OS=Homo sapiens OX=9606 GN=CKAP2
	Q9HC38-2|GLOD4_HUMAN	130.6	13	4	4	33233	Isoform 2 of Glyoxalase domain-containing protein 4 OS=Homo sapiens OX=9606 GN=GLOD4
	Q9BTA9-2|WAC_HUMAN	130.41	6	3	3	65483	Isoform 2 of WW domain-containing adapter protein with coiled-coil OS=Homo sapiens OX=9606 GN=WAC
	O95758-1|PTBP3_HUMAN	130.39	9	4	1	56502	Isoform 1 of Polypyrimidine tract-binding protein 3 OS=Homo sapiens OX=9606 GN=PTBP3
	P42771|CDN2A_HUMAN	130.34	31	4	4	16533	Cyclin-dependent kinase inhibitor 2A OS=Homo sapiens OX=9606 GN=CDKN2A PE=1 SV=2
	Q9HD15|SRA1_HUMAN	130.31	19	4	4	25673	Steroid receptor RNA activator 1 OS=Homo sapiens OX=9606 GN=SRA1 PE=1 SV=1
	Q15773|MLF2_HUMAN	130.3	16	3	3	28147	Myeloid leukemia factor 2 OS=Homo sapiens OX=9606 GN=MLF2 PE=1 SV=1
	Q9BU76-4|MMTA2_HUMAN	130.29	19	3	3	20536	Isoform 4 of Multiple myeloma tumor-associated protein 2 OS=Homo sapiens OX=9606 GN=MMTAG2
	Q8IVD9|NUDC3_HUMAN	130.27	20	6	6	40822	NudC domain-containing protein 3 OS=Homo sapiens OX=9606 GN=NUDCD3 PE=1 SV=3
	P78527-2|PRKDC_HUMAN	130.2	1	4	4	465505	Isoform 2 of DNA-dependent protein kinase catalytic subunit OS=Homo sapiens OX=9606 GN=PRKDC
	Q96G25-2|MED8_HUMAN	130.15	14	3	3	32819	Isoform 2 of Mediator of RNA polymerase II transcription subunit 8 OS=Homo sapiens OX=9606 GN=MED8
	Q07157-2|ZO1_HUMAN	130.09	3	5	5	186965	Isoform Short of Tight junction protein ZO-1 OS=Homo sapiens OX=9606 GN=TJP1
	P18621|RL17_HUMAN	129.96	19	4	4	21397	60S ribosomal protein L17 OS=Homo sapiens OX=9606 GN=RPL17 PE=1 SV=3
	O15504|NUP42_HUMAN	129.95	14	4	4	44872	Nucleoporin NUP42 OS=Homo sapiens OX=9606 GN=NUP42 PE=1 SV=1
	Q92609|TBCD5_HUMAN	129.94	6	3	3	89004	TBC1 domain family member 5 OS=Homo sapiens OX=9606 GN=TBC1D5 PE=1 SV=1
	O75531|BAF_HUMAN	129.88	48	3	3	10059	Barrier-to-autointegration factor OS=Homo sapiens OX=9606 GN=BANF1 PE=1 SV=1
	O15371-2|EIF3D_HUMAN	129.73	10	4	4	58141	Isoform 2 of Eukaryotic translation initiation factor 3 subunit D OS=Homo sapiens OX=9606 GN=EIF3D
	Q6UB35|C1TM_HUMAN	129.65	7	5	5	105790	Monofunctional C1-tetrahydrofolate synthase mitochondrial OS=Homo sapiens OX=9606 GN=MTHFD1L PE=1 SV=1
	P62280|RS11_HUMAN	129.61	23	4	4	18431	40S ribosomal protein S11 OS=Homo sapiens OX=9606 GN=RPS11 PE=1 SV=3
	P30626-3|SORCN_HUMAN	129.58	22	4	4	20006	Isoform 3 of Sorcin OS=Homo sapiens OX=9606 GN=SRI
	P49591|SYSC_HUMAN	129.54	9	4	4	58777	Serine--tRNA ligase cytoplasmic OS=Homo sapiens OX=9606 GN=SARS PE=1 SV=3
	P67775-2|PP2AA_HUMAN	129.37	10	2	2	29735	Isoform 2 of Serine/threonine-protein phosphatase 2A catalytic subunit alpha isoform OS=Homo sapiens OX=9606 GN=PPP2CA
	Q9H845|ACAD9_HUMAN	129.35	4	2	2	68760	Complex I assembly factor ACAD9 mitochondrial OS=Homo sapiens OX=9606 GN=ACAD9 PE=1 SV=1
	O60232|ZNRD2_HUMAN	129.27	13	2	2	21474	Protein ZNRD2 OS=Homo sapiens OX=9606 GN=ZNRD2 PE=1 SV=1
	Q96SI1|KCD15_HUMAN	129.22	16	5	4	31942	BTB/POZ domain-containing protein KCTD15 OS=Homo sapiens OX=9606 GN=KCTD15 PE=1 SV=1
	Q9NX40|OCAD1_HUMAN	129.04	15	3	3	27626	OCIA domain-containing protein 1 OS=Homo sapiens OX=9606 GN=OCIAD1 PE=1 SV=1
	P30519-2|HMOX2_HUMAN	128.95	14	4	4	32837	Isoform 2 of Heme oxygenase 2 OS=Homo sapiens OX=9606 GN=HMOX2
	Q8TB72-3|PUM2_HUMAN	128.93	4	4	2	114003	Isoform 3 of Pumilio homolog 2 OS=Homo sapiens OX=9606 GN=PUM2
	Q14919|NC2A_HUMAN	128.91	20	3	3	22350	Dr1-associated corepressor OS=Homo sapiens OX=9606 GN=DRAP1 PE=1 SV=3
	P50914|RL14_HUMAN	128.82	16	3	3	23432	60S ribosomal protein L14 OS=Homo sapiens OX=9606 GN=RPL14 PE=1 SV=4
	P0DN76|U2AF5_HUMAN	128.7	12	3	3	27872	Splicing factor U2AF 35 kDa subunit-like protein OS=Homo sapiens OX=9606 GN=U2AF1L5 PE=1 SV=1
	Q92575|UBXN4_HUMAN	128.64	14	4	4	56778	UBX domain-containing protein 4 OS=Homo sapiens OX=9606 GN=UBXN4 PE=1 SV=2
	Q02978-2|M2OM_HUMAN	128.63	16	4	4	28494	Isoform 2 of Mitochondrial 2-oxoglutarate/malate carrier protein OS=Homo sapiens OX=9606 GN=SLC25A11
	Q9Y6M1-5|IF2B2_HUMAN	128.57	8	3	2	54722	Isoform 5 of Insulin-like growth factor 2 mRNA-binding protein 2 OS=Homo sapiens OX=9606 GN=IGF2BP2
	P43490|NAMPT_HUMAN	128.5	10	3	3	55521	Nicotinamide phosphoribosyltransferase OS=Homo sapiens OX=9606 GN=NAMPT PE=1 SV=1
	P48047|ATPO_HUMAN	128.49	15	3	3	23277	ATP synthase subunit O mitochondrial OS=Homo sapiens OX=9606 GN=ATP5PO PE=1 SV=1
	O15162-2|PLS1_HUMAN	128.34	18	3	3	26825	Isoform 2 of Phospholipid scramblase 1 OS=Homo sapiens OX=9606 GN=PLSCR1
	O15173|PGRC2_HUMAN	128.31	16	3	2	23818	Membrane-associated progesterone receptor component 2 OS=Homo sapiens OX=9606 GN=PGRMC2 PE=1 SV=1
	Q9BWW4-2|SSBP3_HUMAN	128.28	11	4	4	37697	Isoform 2 of Single-stranded DNA-binding protein 3 OS=Homo sapiens OX=9606 GN=SSBP3
	Q96QK1|VPS35_HUMAN	128	6	4	4	91707	Vacuolar protein sorting-associated protein 35 OS=Homo sapiens OX=9606 GN=VPS35 PE=1 SV=2
	Q00653-4|NFKB2_HUMAN	127.89	3	2	2	96678	Isoform 4 of Nuclear factor NF-kappa-B p100 subunit OS=Homo sapiens OX=9606 GN=NFKB2
	Q16836|HCDH_HUMAN	127.84	13	4	4	34294	Hydroxyacyl-coenzyme A dehydrogenase mitochondrial OS=Homo sapiens OX=9606 GN=HADH PE=1 SV=3
	P62854|RS26_HUMAN	127.83	34	3	3	13015	40S ribosomal protein S26 OS=Homo sapiens OX=9606 GN=RPS26 PE=1 SV=3
	Q99956|DUS9_HUMAN	127.7	17	4	4	41868	Dual specificity protein phosphatase 9 OS=Homo sapiens OX=9606 GN=DUSP9 PE=1 SV=1
	Q9NUJ1|ABHDA_HUMAN	127.66	12	2	2	33933	Mycophenolic acid acyl-glucuronide esterase mitochondrial OS=Homo sapiens OX=9606 GN=ABHD10 PE=1 SV=1
	Q86XN7|PRSR1_HUMAN	127.62	6	5	5	95698	Proline and serine-rich protein 1 OS=Homo sapiens OX=9606 GN=PROSER1 PE=1 SV=2
	O00287|RFXAP_HUMAN	127.59	18	3	3	28232	Regulatory factor X-associated protein OS=Homo sapiens OX=9606 GN=RFXAP PE=1 SV=1
	Q99871-3|HAUS7_HUMAN	127.56	12	2	2	37524	Isoform 3 of HAUS augmin-like complex subunit 7 OS=Homo sapiens OX=9606 GN=HAUS7
	Q9BXP5-4|SRRT_HUMAN	127.54	6	4	4	100147	Isoform 4 of Serrate RNA effector molecule homolog OS=Homo sapiens OX=9606 GN=SRRT
	Q86U44|MTA70_HUMAN	127.34	6	3	3	64474	N6-adenosine-methyltransferase catalytic subunit OS=Homo sapiens OX=9606 GN=METTL3 PE=1 SV=2	62
	Q15717|ELAV1_HUMAN	127.33	12	3	3	36092	ELAV-like protein 1 OS=Homo sapiens OX=9606 GN=ELAVL1 PE=1 SV=2
	Q9UHD1|CHRD1_HUMAN	127.29	9	2	2	37490	Cysteine and histidine-rich domain-containing protein 1 OS=Homo sapiens OX=9606 GN=CHORDC1 PE=1 SV=2
	O75177|CREST_HUMAN	127.18	6	2	2	42990	Calcium-responsive transactivator OS=Homo sapiens OX=9606 GN=SS18L1 PE=1 SV=2
	P54819-3|KAD2_HUMAN	127.17	18	3	3	22265	Isoform 3 of Adenylate kinase 2 mitochondrial OS=Homo sapiens OX=9606 GN=AK2
	Q9P270|SLAI2_HUMAN	127	12	4	4	62543	SLAIN motif-containing protein 2 OS=Homo sapiens OX=9606 GN=SLAIN2 PE=1 SV=2
	P29558-2|RBMS1_HUMAN	126.99	8	3	3	44137	Isoform 2 of RNA-binding motif single-stranded-interacting protein 1 OS=Homo sapiens OX=9606 GN=RBMS1
	Q15427|SF3B4_HUMAN	126.98	8	3	3	44386	Splicing factor 3B subunit 4 OS=Homo sapiens OX=9606 GN=SF3B4 PE=1 SV=1
	Q9NSD9|SYFB_HUMAN	126.93	7	4	4	66116	Phenylalanine--tRNA ligase beta subunit OS=Homo sapiens OX=9606 GN=FARSB PE=1 SV=3
	Q9BX68|HINT2_HUMAN	126.71	21	2	2	17162	Histidine triad nucleotide-binding protein 2 mitochondrial OS=Homo sapiens OX=9606 GN=HINT2 PE=1 SV=1
	P62495-2|ERF1_HUMAN	126.66	11	4	4	45463	Isoform 2 of Eukaryotic peptide chain release factor subunit 1 OS=Homo sapiens OX=9606 GN=ETF1
	P62906|RL10A_HUMAN	126.16	21	4	4	24831	60S ribosomal protein L10a OS=Homo sapiens OX=9606 GN=RPL10A PE=1 SV=2
	O00233|PSMD9_HUMAN	126.11	19	4	4	24682	26S proteasome non-ATPase regulatory subunit 9 OS=Homo sapiens OX=9606 GN=PSMD9 PE=1 SV=3
	Q7Z4H3-2|HDDC2_HUMAN	126.03	18	2	2	19550	Isoform 2 of HD domain-containing protein 2 OS=Homo sapiens OX=9606 GN=HDDC2
	Q8TC07-2|TBC15_HUMAN	125.96	7	4	4	77395	Isoform 2 of TBC1 domain family member 15 OS=Homo sapiens OX=9606 GN=TBC1D15	68, 235
	P46976-2|GLYG_HUMAN	125.96	14	4	4	37479	Isoform GN-1 of Glycogenin-1 OS=Homo sapiens OX=9606 GN=GYG1
	Q9H074|PAIP1_HUMAN	125.96	8	4	4	53525	Polyadenylate-binding protein-interacting protein 1 OS=Homo sapiens OX=9606 GN=PAIP1 PE=1 SV=1
	Q9H3N1|TMX1_HUMAN	125.96	15	4	4	31791	Thioredoxin-related transmembrane protein 1 OS=Homo sapiens OX=9606 GN=TMX1 PE=1 SV=1
	P49023-2|PAXI_HUMAN	125.87	7	3	3	60967	Isoform Alpha of Paxillin OS=Homo sapiens OX=9606 GN=PXN	93
	P41236|IPP2_HUMAN	125.68	14	3	3	23015	Protein phosphatase inhibitor 2 OS=Homo sapiens OX=9606 GN=PPP1R2 PE=1 SV=2
	P42677|RS27_HUMAN	125.35	38	3	3	9461	40S ribosomal protein S27 OS=Homo sapiens OX=9606 GN=RPS27 PE=1 SV=3
	Q6ZWJ1|STXB4_HUMAN	125.33	9	4	4	61662	Syntaxin-binding protein 4 OS=Homo sapiens OX=9606 GN=STXBP4 PE=1 SV=2
	P63279|UBC9_HUMAN	125.28	20	3	3	18007	SUMO-conjugating enzyme UBC9 OS=Homo sapiens OX=9606 GN=UBE2I PE=1 SV=1
	Q13151|ROA0_HUMAN	125.28	13	3	2	30841	Heterogeneous nuclear ribonucleoprotein A0 OS=Homo sapiens OX=9606 GN=HNRNPA0 PE=1 SV=1
	O95816|BAG2_HUMAN	125.25	18	4	4	23772	BAG family molecular chaperone regulator 2 OS=Homo sapiens OX=9606 GN=BAG2 PE=1 SV=1
	Q13243|SRSF5_HUMAN	124.77	12	3	2	31264	Serine/arginine-rich splicing factor 5 OS=Homo sapiens OX=9606 GN=SRSF5 PE=1 SV=1
	P53618|COPB_HUMAN	124.38	6	5	5	107142	Coatomer subunit beta OS=Homo sapiens OX=9606 GN=COPB1 PE=1 SV=3
	P17544-3|ATF7_HUMAN	124.34	7	2	2	50860	Isoform 2 of Cyclic AMP-dependent transcription factor ATF-7 OS=Homo sapiens OX=9606 GN=ATF7
	P07741|APT_HUMAN	124.29	24	3	3	19608	Adenine phosphoribosyltransferase OS=Homo sapiens OX=9606 GN=APRT PE=1 SV=2
	Q9NQA3|WASH6_HUMAN	124.22	7	2	1	47990	WAS protein family homolog 6 OS=Homo sapiens OX=9606 GN=WASH6P PE=1 SV=3
	Q15819|UB2V2_HUMAN	124.2	22	3	3	16363	Ubiquitin-conjugating enzyme E2 variant 2 OS=Homo sapiens OX=9606 GN=UBE2V2 PE=1 SV=4
	P28331-3|NDUS1_HUMAN	124.16	7	3	3	67524	Isoform 3 of NADH-ubiquinone oxidoreductase 75 kDa subunit mitochondrial OS=Homo sapiens OX=9606 GN=NDUFS1
	P51571|SSRD_HUMAN	124.09	17	2	2	18999	Translocon-associated protein subunit delta OS=Homo sapiens OX=9606 GN=SSR4 PE=1 SV=1
	P61513|RL37A_HUMAN	124.09	38	3	3	10275	60S ribosomal protein L37a OS=Homo sapiens OX=9606 GN=RPL37A PE=1 SV=2
	Q13595|TRA2A_HUMAN	124.05	11	3	3	32689	Transformer-2 protein homolog alpha OS=Homo sapiens OX=9606 GN=TRA2A PE=1 SV=1
	Q9NPH2-2|INO1_HUMAN	123.97	9	3	3	47146	Isoform 2 of Inositol-3-phosphate synthase 1 OS=Homo sapiens OX=9606 GN=ISYNA1
	P25686|DNJB2_HUMAN	123.86	15	4	3	35580	DnaJ homolog subfamily B member 2 OS=Homo sapiens OX=9606 GN=DNAJB2 PE=1 SV=3
	P41567|EIF1_HUMAN	123.84	27	2	2	12732	Eukaryotic translation initiation factor 1 OS=Homo sapiens OX=9606 GN=EIF1 PE=1 SV=1
	Q9Y5X1|SNX9_HUMAN	123.84	7	2	2	66592	Sorting nexin-9 OS=Homo sapiens OX=9606 GN=SNX9 PE=1 SV=1
	Q12904|AIMP1_HUMAN	123.7	22	4	4	34353	Aminoacyl tRNA synthase complex-interacting multifunctional protein 1 OS=Homo sapiens OX=9606 GN=AIMP1 PE=1 SV=2
	Q06124-2|PTN11_HUMAN	123.53	6	3	3	68011	Isoform 2 of Tyrosine-protein phosphatase non-receptor type 11 OS=Homo sapiens OX=9606 GN=PTPN11
	Q14651|PLSI_HUMAN	123.51	6	3	1	70254	Plastin-1 OS=Homo sapiens OX=9606 GN=PLS1 PE=1 SV=2
	Q86SX6|GLRX5_HUMAN	123.51	16	2	2	16628	Glutaredoxin-related protein 5 mitochondrial OS=Homo sapiens OX=9606 GN=GLRX5 PE=1 SV=2
	Q96AT1|K1143_HUMAN	123.42	17	4	4	17465	Uncharacterized protein KIAA1143 OS=Homo sapiens OX=9606 GN=KIAA1143 PE=1 SV=2
	O75496|GEMI_HUMAN	123.4	22	3	3	23565	Geminin OS=Homo sapiens OX=9606 GN=GMNN PE=1 SV=1
	Q6P2Q9|PRP8_HUMAN	123.34	3	5	5	273599	Pre-mRNA-processing-splicing factor 8 OS=Homo sapiens OX=9606 GN=PRPF8 PE=1 SV=2
	P09668|CATH_HUMAN	123.32	12	3	3	37394	Pro-cathepsin H OS=Homo sapiens OX=9606 GN=CTSH PE=1 SV=4
	P67870|CSK2B_HUMAN	123.18	15	2	2	24942	Casein kinase II subunit beta OS=Homo sapiens OX=9606 GN=CSNK2B PE=1 SV=1
	P84098|RL19_HUMAN	123.14	13	2	2	23466	60S ribosomal protein L19 OS=Homo sapiens OX=9606 GN=RPL19 PE=1 SV=1
	Q8NFH5-2|NUP35_HUMAN	123.08	10	2	2	33120	Isoform 2 of Nucleoporin NUP35 OS=Homo sapiens OX=9606 GN=NUP35
	O94855|SC24D_HUMAN	122.92	3	2	2	113010	Protein transport protein Sec24D OS=Homo sapiens OX=9606 GN=SEC24D PE=1 SV=2
	P62249|RS16_HUMAN	122.8	32	5	5	16445	40S ribosomal protein S16 OS=Homo sapiens OX=9606 GN=RPS16 PE=1 SV=2
	P61163|ACTZ_HUMAN	122.64	13	3	3	42614	Alpha-centractin OS=Homo sapiens OX=9606 GN=ACTR1A PE=1 SV=1
	Q9BWG4-2|SSBP4_HUMAN	122.54	7	2	1	37214	Isoform 2 of Single-stranded DNA-binding protein 4 OS=Homo sapiens OX=9606 GN=SSBP4
	P31483|TIA1_HUMAN	122.41	9	3	2	42963	Nucleolysin TIA-1 isoform p40 OS=Homo sapiens OX=9606 GN=TIA1 PE=1 SV=3
	P23434|GCSH_HUMAN	122.4	17	2	2	18885	Glycine cleavage system H protein mitochondrial OS=Homo sapiens OX=9606 GN=GCSH PE=1 SV=2
	P62993|GRB2_HUMAN	122.29	14	3	3	25206	Growth factor receptor-bound protein 2 OS=Homo sapiens OX=9606 GN=GRB2 PE=1 SV=1
	O95486|SC24A_HUMAN	122.28	5	4	3	119749	Protein transport protein Sec24A OS=Homo sapiens OX=9606 GN=SEC24A PE=1 SV=2
	P16220-2|CREB1_HUMAN	122.27	18	4	2	35136	Isoform CREB-B of Cyclic AMP-responsive element-binding protein 1 OS=Homo sapiens OX=9606 GN=CREB1
	Q7Z2K8|GRIN1_HUMAN	122.26	6	5	5	102399	G protein-regulated inducer of neurite outgrowth 1 OS=Homo sapiens OX=9606 GN=GPRIN1 PE=1 SV=2
	Q8N573-2|OXR1_HUMAN	122.23	5	3	3	93734	Isoform 2 of Oxidation resistance protein 1 OS=Homo sapiens OX=9606 GN=OXR1
	O95861-4|BPNT1_HUMAN	122.14	13	4	4	29189	Isoform 4 of 3'(2') 5'-bisphosphate nucleotidase 1 OS=Homo sapiens OX=9606 GN=BPNT1
	P62491-2|RB11A_HUMAN	122.1	26	4	4	17659	Isoform 2 of Ras-related protein Rab-11A OS=Homo sapiens OX=9606 GN=RAB11A
	P30566-2|PUR8_HUMAN	121.89	11	2	2	48328	Isoform 2 of Adenylosuccinate lyase OS=Homo sapiens OX=9606 GN=ADSL
	Q86U42|PABP2_HUMAN	121.81	9	4	4	32749	Polyadenylate-binding protein 2 OS=Homo sapiens OX=9606 GN=PABPN1 PE=1 SV=3
	Q7Z4W1|DCXR_HUMAN	121.8	21	5	5	25913	L-xylulose reductase OS=Homo sapiens OX=9606 GN=DCXR PE=1 SV=2
	P26583|HMGB2_HUMAN	121.74	18	5	4	24034	High mobility group protein B2 OS=Homo sapiens OX=9606 GN=HMGB2 PE=1 SV=2
	P09497-2|CLCB_HUMAN	121.67	19	5	5	23181	Isoform Non-brain of Clathrin light chain B OS=Homo sapiens OX=9606 GN=CLTB
	O95716|RAB3D_HUMAN	121.65	12	3	1	24267	Ras-related protein Rab-3D OS=Homo sapiens OX=9606 GN=RAB3D PE=1 SV=1
	P26373|RL13_HUMAN	121.63	19	4	4	24261	60S ribosomal protein L13 OS=Homo sapiens OX=9606 GN=RPL13 PE=1 SV=4
	P04843|RPN1_HUMAN	121.31	7	4	4	68569	Dolichyl-diphosphooligosaccharide--protein glycosyltransferase subunit 1 OS=Homo sapiens OX=9606 GN=RPN1 PE=1 SV=1
	Q9NX63|MIC19_HUMAN	121.01	14	3	3	26152	MICOS complex subunit MIC19 OS=Homo sapiens OX=9606 GN=CHCHD3 PE=1 SV=1
	Q9NWQ8|PHAG1_HUMAN	120.67	7	2	2	46981	Phosphoprotein associated with glycosphingolipid-enriched microdomains 1 OS=Homo sapiens OX=9606 GN=PAG1 PE=1 SV=2
	P04183|KITH_HUMAN	120.58	16	3	3	25469	Thymidine kinase cytosolic OS=Homo sapiens OX=9606 GN=TK1 PE=1 SV=2
	Q15118|PDK1_HUMAN	120.36	6	2	2	49244	[Pyruvate dehydrogenase (acetyl-transferring)] kinase isozyme 1 mitochondrial OS=Homo sapiens OX=9606 GN=PDK1 PE=1 SV=1
	Q9UPN6|SCAF8_HUMAN	120.27	5	4	4	140519	SR-related and CTD-associated factor 8 OS=Homo sapiens OX=9606 GN=SCAF8 PE=1 SV=1
	P61970|NTF2_HUMAN	120.04	17	2	2	14478	Nuclear transport factor 2 OS=Homo sapiens OX=9606 GN=NUTF2 PE=1 SV=1
	O00629|IMA3_HUMAN	120.03	10	2	2	57887	Importin subunit alpha-3 OS=Homo sapiens OX=9606 GN=KPNA4 PE=1 SV=1
	O43143|DHX15_HUMAN	119.87	3	2	2	90933	Pre-mRNA-splicing factor ATP-dependent RNA helicase DHX15 OS=Homo sapiens OX=9606 GN=DHX15 PE=1 SV=2
	Q9H8S9|MOB1A_HUMAN	119.79	17	3	3	25080	MOB kinase activator 1A OS=Homo sapiens OX=9606 GN=MOB1A PE=1 SV=4
	Q06203|PUR1_HUMAN	119.49	6	2	2	57399	Amidophosphoribosyltransferase OS=Homo sapiens OX=9606 GN=PPAT PE=1 SV=1
	Q9NRX2|RM17_HUMAN	119.43	21	4	4	20050	39S ribosomal protein L17 mitochondrial OS=Homo sapiens OX=9606 GN=MRPL17 PE=1 SV=1
	P63220|RS21_HUMAN	119.35	28	2	2	9111	40S ribosomal protein S21 OS=Homo sapiens OX=9606 GN=RPS21 PE=1 SV=1
	Q9Y2R0|COA3_HUMAN	119.16	36	4	4	11731	Cytochrome c oxidase assembly factor 3 homolog mitochondrial OS=Homo sapiens OX=9606 GN=COA3 PE=1 SV=1
	P02794|FRIH_HUMAN	118.8	18	3	3	21226	Ferritin heavy chain OS=Homo sapiens OX=9606 GN=FTH1 PE=1 SV=2
	P32929-3|CGL_HUMAN	118.62	11	4	4	41260	Isoform 3 of Cystathionine gamma-lyase OS=Homo sapiens OX=9606 GN=CTH
	Q9H2J4|PDCL3_HUMAN	118.55	15	3	3	27614	Phosducin-like protein 3 OS=Homo sapiens OX=9606 GN=PDCL3 PE=1 SV=1
	Q8WXX5|DNJC9_HUMAN	118.51	20	4	4	29910	DnaJ homolog subfamily C member 9 OS=Homo sapiens OX=9606 GN=DNAJC9 PE=1 SV=1
	Q08945|SSRP1_HUMAN	118.46	5	3	3	81075	FACT complex subunit SSRP1 OS=Homo sapiens OX=9606 GN=SSRP1 PE=1 SV=1
	P30837|AL1B1_HUMAN	118.44	10	4	3	57206	Aldehyde dehydrogenase X mitochondrial OS=Homo sapiens OX=9606 GN=ALDH1B1 PE=1 SV=3
	P23381|SYWC_HUMAN	118.06	9	4	4	53165	Tryptophan--tRNA ligase cytoplasmic OS=Homo sapiens OX=9606 GN=WARS PE=1 SV=2
	Q9NRN7|ADPPT_HUMAN	118.06	7	2	2	35776	L-aminoadipate-semialdehyde dehydrogenase-phosphopantetheinyl transferase OS=Homo sapiens OX=9606 GN=AASDHPPT PE=1 SV=2
	Q9C0C9|UBE2O_HUMAN	117.8	4	4	4	141293	(E3-independent) E2 ubiquitin-conjugating enzyme OS=Homo sapiens OX=9606 GN=UBE2O PE=1 SV=3
	P02788-2|TRFL_HUMAN	117.74	3	2	2	73161	Isoform DeltaLf of Lactotransferrin OS=Homo sapiens OX=9606 GN=LTF
	O75608-2|LYPA1_HUMAN	117.68	26	4	4	22875	Isoform 2 of Acyl-protein thioesterase 1 OS=Homo sapiens OX=9606 GN=LYPLA1
	P50219|MNX1_HUMAN	117.59	7	2	2	40569	Motor neuron and pancreas homeobox protein 1 OS=Homo sapiens OX=9606 GN=MNX1 PE=1 SV=3
	P24941|CDK2_HUMAN	117.49	7	2	1	33930	Cyclin-dependent kinase 2 OS=Homo sapiens OX=9606 GN=CDK2 PE=1 SV=2
	P21796|VDAC1_HUMAN	117.01	16	3	3	30773	Voltage-dependent anion-selective channel protein 1 OS=Homo sapiens OX=9606 GN=VDAC1 PE=1 SV=2
	P54709|AT1B3_HUMAN	116.96	13	3	3	31513	Sodium/potassium-transporting ATPase subunit beta-3 OS=Homo sapiens OX=9606 GN=ATP1B3 PE=1 SV=1
	Q6PI48|SYDM_HUMAN	116.96	7	4	4	73563	Aspartate--tRNA ligase mitochondrial OS=Homo sapiens OX=9606 GN=DARS2 PE=1 SV=1
	Q06547-4|GABP1_HUMAN	116.87	11	4	4	36950	Isoform 4 of GA-binding protein subunit beta-1 OS=Homo sapiens OX=9606 GN=GABPB1
	Q8IU81|I2BP1_HUMAN	116.6	7	4	3	61688	Interferon regulatory factor 2-binding protein 1 OS=Homo sapiens OX=9606 GN=IRF2BP1 PE=1 SV=1
	P63173|RL38_HUMAN	116.48	47	3	3	8218	60S ribosomal protein L38 OS=Homo sapiens OX=9606 GN=RPL38 PE=1 SV=2
	Q9NVS9-4|PNPO_HUMAN	116.48	15	3	3	25200	Isoform 4 of Pyridoxine-5'-phosphate oxidase OS=Homo sapiens OX=9606 GN=PNPO
	Q8IWJ2|GCC2_HUMAN	116.47	2	2	2	195908	GRIP and coiled-coil domain-containing protein 2 OS=Homo sapiens OX=9606 GN=GCC2 PE=1 SV=4
	P55735-2|SEC13_HUMAN	116.42	13	2	2	34012	Isoform 2 of Protein SEC13 homolog OS=Homo sapiens OX=9606 GN=SEC13
	Q99829|CPNE1_HUMAN	116.28	5	3	3	59059	Copine-1 OS=Homo sapiens OX=9606 GN=CPNE1 PE=1 SV=1
	Q9UIU6|SIX4_HUMAN	116.28	5	3	3	82933	Homeobox protein SIX4 OS=Homo sapiens OX=9606 GN=SIX4 PE=1 SV=2
	Q9Y2R5|RT17_HUMAN	116.28	45	3	3	14502	28S ribosomal protein S17 mitochondrial OS=Homo sapiens OX=9606 GN=MRPS17 PE=1 SV=1
	P43897|EFTS_HUMAN	116.23	9	2	2	35391	Elongation factor Ts mitochondrial OS=Homo sapiens OX=9606 GN=TSFM PE=1 SV=2
	O15498-2|YKT6_HUMAN	115.98	23	3	3	18580	Isoform 2 of Synaptobrevin homolog YKT6 OS=Homo sapiens OX=9606 GN=YKT6	182
	Q9Y6W5|WASF2_HUMAN	115.74	4	2	2	54284	Wiskott-Aldrich syndrome protein family member 2 OS=Homo sapiens OX=9606 GN=WASF2 PE=1 SV=3
	Q9UNF0-2|PACN2_HUMAN	115.7	9	4	4	51353	Isoform 2 of Protein kinase C and casein kinase substrate in neurons protein 2 OS=Homo sapiens OX=9606 GN=PACSIN2
	Q9ULH7|MRTFB_HUMAN	115.48	6	3	3	118127	Myocardin-related transcription factor B OS=Homo sapiens OX=9606 GN=MRTFB PE=1 SV=3
	P61313|RL15_HUMAN	115.38	10	2	2	24146	60S ribosomal protein L15 OS=Homo sapiens OX=9606 GN=RPL15 PE=1 SV=2
	Q53GS9-2|SNUT2_HUMAN	115.27	9	3	3	53510	Isoform 2 of U4/U6.U5 tri-snRNP-associated protein 2 OS=Homo sapiens OX=9606 GN=USP39
	Q9H3S7|PTN23_HUMAN	115.01	3	4	4	178972	Tyrosine-protein phosphatase non-receptor type 23 OS=Homo sapiens OX=9606 GN=PTPN23 PE=1 SV=1
	P49756|RBM25_HUMAN	114.66	5	3	3	100186	RNA-binding protein 25 OS=Homo sapiens OX=9606 GN=RBM25 PE=1 SV=3
	P61326|MGN_HUMAN	114.63	40	3	3	17164	Protein mago nashi homolog OS=Homo sapiens OX=9606 GN=MAGOH PE=1 SV=1
	P30044-2|PRDX5_HUMAN	114.62	32	4	4	17031	Isoform Cytoplasmic+peroxisomal of Peroxiredoxin-5 mitochondrial OS=Homo sapiens OX=9606 GN=PRDX5
	Q9HD42|CHM1A_HUMAN	114.61	17	4	4	21703	Charged multivesicular body protein 1a OS=Homo sapiens OX=9606 GN=CHMP1A PE=1 SV=1
	Q93009-3|UBP7_HUMAN	114.52	4	4	4	126269	Isoform 3 of Ubiquitin carboxyl-terminal hydrolase 7 OS=Homo sapiens OX=9606 GN=USP7
	P12955-3|PEPD_HUMAN	114.44	8	3	3	47261	Isoform 3 of Xaa-Pro dipeptidase OS=Homo sapiens OX=9606 GN=PEPD
	Q00534|CDK6_HUMAN	114.3	7	2	1	36938	Cyclin-dependent kinase 6 OS=Homo sapiens OX=9606 GN=CDK6 PE=1 SV=1
	Q7KZF4|SND1_HUMAN	114.11	5	3	3	101997	Staphylococcal nuclease domain-containing protein 1 OS=Homo sapiens OX=9606 GN=SND1 PE=1 SV=1
	Q86TP1|PRUN1_HUMAN	114.11	6	2	2	50200	Exopolyphosphatase PRUNE1 OS=Homo sapiens OX=9606 GN=PRUNE1 PE=1 SV=2
	O43169|CYB5B_HUMAN	113.92	31	2	2	16695	Cytochrome b5 type B OS=Homo sapiens OX=9606 GN=CYB5B PE=1 SV=3
	P60468|SC61B_HUMAN	113.55	26	2	2	9974	Protein transport protein Sec61 subunit beta OS=Homo sapiens OX=9606 GN=SEC61B PE=1 SV=2
	Q96P16-3|RPR1A_HUMAN	113.37	10	2	2	31625	Isoform 2 of Regulation of nuclear pre-mRNA domain-containing protein 1A OS=Homo sapiens OX=9606 GN=RPRD1A
	P50570-2|DYN2_HUMAN	113.21	5	3	3	97652	Isoform 2 of Dynamin-2 OS=Homo sapiens OX=9606 GN=DNM2
	P41252|SYIC_HUMAN	113.2	4	5	5	144498	Isoleucine--tRNA ligase cytoplasmic OS=Homo sapiens OX=9606 GN=IARS PE=1 SV=2
	O43516|WIPF1_HUMAN	113.1	9	4	4	51259	WAS/WASL-interacting protein family member 1 OS=Homo sapiens OX=9606 GN=WIPF1 PE=1 SV=3
	Q08J23|NSUN2_HUMAN	113.06	6	3	3	86471	RNA cytosine C(5)-methyltransferase NSUN2 OS=Homo sapiens OX=9606 GN=NSUN2 PE=1 SV=2
	Q96CP2|FWCH2_HUMAN	112.97	32	3	3	14564	FLYWCH family member 2 OS=Homo sapiens OX=9606 GN=FLYWCH2 PE=1 SV=1	138
	Q10713|MPPA_HUMAN	112.94	6	3	3	58253	Mitochondrial-processing peptidase subunit alpha OS=Homo sapiens OX=9606 GN=PMPCA PE=1 SV=2
	Q9C0B1|FTO_HUMAN	112.75	9	4	4	58282	Alpha-ketoglutarate-dependent dioxygenase FTO OS=Homo sapiens OX=9606 GN=FTO PE=1 SV=3
	P21266|GSTM3_HUMAN	112.74	20	4	4	26560	Glutathione S-transferase Mu 3 OS=Homo sapiens OX=9606 GN=GSTM3 PE=1 SV=3
	Q9BTD8-4|RBM42_HUMAN	112.61	14	4	4	47025	Isoform 4 of RNA-binding protein 42 OS=Homo sapiens OX=9606 GN=RBM42
	P49189|AL9A1_HUMAN	112.49	7	3	3	53802	4-trimethylaminobutyraldehyde dehydrogenase OS=Homo sapiens OX=9606 GN=ALDH9A1 PE=1 SV=3
	Q969Z0|FAKD4_HUMAN	112.44	8	3	3	70738	FAST kinase domain-containing protein 4 OS=Homo sapiens OX=9606 GN=TBRG4 PE=1 SV=1
	Q96P70|IPO9_HUMAN	112.39	3	2	2	115963	Importin-9 OS=Homo sapiens OX=9606 GN=IPO9 PE=1 SV=3
	Q9BY77|PDIP3_HUMAN	112.37	6	2	2	46089	Polymerase delta-interacting protein 3 OS=Homo sapiens OX=9606 GN=POLDIP3 PE=1 SV=2
	Q15645|PCH2_HUMAN	112.31	11	4	4	48551	Pachytene checkpoint protein 2 homolog OS=Homo sapiens OX=9606 GN=TRIP13 PE=1 SV=2
	O95292|VAPB_HUMAN	112.23	19	4	3	27228	Vesicle-associated membrane protein-associated protein B/C OS=Homo sapiens OX=9606 GN=VAPB PE=1 SV=3	155
	Q9UDY2-3|ZO2_HUMAN	111.85	4	3	3	131368	Isoform C1 of Tight junction protein ZO-2 OS=Homo sapiens OX=9606 GN=TJP2
	O60841|IF2P_HUMAN	111.72	3	3	3	138827	Eukaryotic translation initiation factor 5B OS=Homo sapiens OX=9606 GN=EIF5B PE=1 SV=4
	P50213|IDH3A_HUMAN	111.64	15	4	4	39592	Isocitrate dehydrogenase [NAD] subunit alpha mitochondrial OS=Homo sapiens OX=9606 GN=IDH3A PE=1 SV=1
	O00116|ADAS_HUMAN	111.6	5	2	2	72912	Alkyldihydroxyacetonephosphate synthase peroxisomal OS=Homo sapiens OX=9606 GN=AGPS PE=1 SV=1
	P62857|RS28_HUMAN	111.59	30	2	2	7841	40S ribosomal protein S28 OS=Homo sapiens OX=9606 GN=RPS28 PE=1 SV=1
	Q9BR61|ACBD6_HUMAN	111.56	11	2	2	31151	Acyl-CoA-binding domain-containing protein 6 OS=Homo sapiens OX=9606 GN=ACBD6 PE=1 SV=1
	Q9BS26|ERP44_HUMAN	111.52	5	2	2	46971	Endoplasmic reticulum resident protein 44 OS=Homo sapiens OX=9606 GN=ERP44 PE=1 SV=1
	P62081|RS7_HUMAN	111.37	16	3	3	22127	40S ribosomal protein S7 OS=Homo sapiens OX=9606 GN=RPS7 PE=1 SV=1
	Q9BT78|CSN4_HUMAN	111.31	8	3	3	46269	COP9 signalosome complex subunit 4 OS=Homo sapiens OX=9606 GN=COPS4 PE=1 SV=1
	O95456-2|PSMG1_HUMAN	111.24	11	2	2	30288	Isoform 2 of Proteasome assembly chaperone 1 OS=Homo sapiens OX=9606 GN=PSMG1
	P18846-2|ATF1_HUMAN	111.19	37	4	2	15295	Isoform 2 of Cyclic AMP-dependent transcription factor ATF-1 OS=Homo sapiens OX=9606 GN=ATF1
	Q96KR1|ZFR_HUMAN	111	3	2	2	117012	Zinc finger RNA-binding protein OS=Homo sapiens OX=9606 GN=ZFR PE=1 SV=2	158
	O95336|6PGL_HUMAN	111	18	3	3	27547	6-phosphogluconolactonase OS=Homo sapiens OX=9606 GN=PGLS PE=1 SV=2
	P09234|RU1C_HUMAN	110.94	13	2	2	17394	U1 small nuclear ribonucleoprotein C OS=Homo sapiens OX=9606 GN=SNRPC PE=1 SV=1	52
	Q86VQ1|GLCI1_HUMAN	110.68	5	2	2	58024	Glucocorticoid-induced transcript 1 protein OS=Homo sapiens OX=9606 GN=GLCCI1 PE=1 SV=1
	Q9Y3A5|SBDS_HUMAN	110.65	23	5	5	28764	Ribosome maturation protein SBDS OS=Homo sapiens OX=9606 GN=SBDS PE=1 SV=4
	Q92541|RTF1_HUMAN	110.33	5	3	3	80314	RNA polymerase-associated protein RTF1 homolog OS=Homo sapiens OX=9606 GN=RTF1 PE=1 SV=4
	P41240|CSK_HUMAN	110	12	4	4	50704	Tyrosine-protein kinase CSK OS=Homo sapiens OX=9606 GN=CSK PE=1 SV=1
	P23368|MAOM_HUMAN	109.89	7	3	3	65444	NAD-dependent malic enzyme mitochondrial OS=Homo sapiens OX=9606 GN=ME2 PE=1 SV=1
	Q9ULX3|NOB1_HUMAN	109.85	12	4	4	46675	RNA-binding protein NOB1 OS=Homo sapiens OX=9606 GN=NOB1 PE=1 SV=1
	Q96RE7|NACC1_HUMAN	109.7	7	3	3	57258	Nucleus accumbens-associated protein 1 OS=Homo sapiens OX=9606 GN=NACC1 PE=1 SV=1
	P19105|ML12A_HUMAN	109.6	12	2	2	19794	Myosin regulatory light chain 12A OS=Homo sapiens OX=9606 GN=MYL12A PE=1 SV=2
	P07477|TRY1_HUMAN	109.57	15	3	3	26558	Trypsin-1 OS=Homo sapiens OX=9606 GN=PRSS1 PE=1 SV=1
	Q8IVM0|CCD50_HUMAN	109.55	7	2	2	35822	Coiled-coil domain-containing protein 50 OS=Homo sapiens OX=9606 GN=CCDC50 PE=1 SV=1
	Q96HE7|ERO1A_HUMAN	109.49	6	2	2	54393	ERO1-like protein alpha OS=Homo sapiens OX=9606 GN=ERO1A PE=1 SV=2
	Q9BWJ5|SF3B5_HUMAN	109.24	30	2	2	10135	Splicing factor 3B subunit 5 OS=Homo sapiens OX=9606 GN=SF3B5 PE=1 SV=1
	Q9UNM6|PSD13_HUMAN	109.23	9	3	3	42946	26S proteasome non-ATPase regulatory subunit 13 OS=Homo sapiens OX=9606 GN=PSMD13 PE=1 SV=2
	P06280|AGAL_HUMAN	109.22	7	2	2	48767	Alpha-galactosidase A OS=Homo sapiens OX=9606 GN=GLA PE=1 SV=1
	P55011-3|S12A2_HUMAN	109.11	3	2	2	129679	Isoform 2 of Solute carrier family 12 member 2 OS=Homo sapiens OX=9606 GN=SLC12A2
	A1X283|SPD2B_HUMAN	109.08	4	4	4	101579	SH3 and PX domain-containing protein 2B OS=Homo sapiens OX=9606 GN=SH3PXD2B PE=1 SV=3	805
	P30046|DOPD_HUMAN	109.03	20	2	2	12712	D-dopachrome decarboxylase OS=Homo sapiens OX=9606 GN=DDT PE=1 SV=3
	Q04726-2|TLE3_HUMAN	108.99	3	2	2	82222	Isoform 2 of Transducin-like enhancer protein 3 OS=Homo sapiens OX=9606 GN=TLE3
	P46781|RS9_HUMAN	108.9	20	4	4	22591	40S ribosomal protein S9 OS=Homo sapiens OX=9606 GN=RPS9 PE=1 SV=3
	P19793-2|RXRA_HUMAN	108.75	10	3	3	41060	Isoform 2 of Retinoic acid receptor RXR-alpha OS=Homo sapiens OX=9606 GN=RXRA
	Q9H0B6|KLC2_HUMAN	108.61	5	2	2	68935	Kinesin light chain 2 OS=Homo sapiens OX=9606 GN=KLC2 PE=1 SV=1	439
	P25786|PSA1_HUMAN	108.52	11	3	3	29556	Proteasome subunit alpha type-1 OS=Homo sapiens OX=9606 GN=PSMA1 PE=1 SV=1
	O00746|NDKM_HUMAN	108.25	14	2	2	20659	Nucleoside diphosphate kinase mitochondrial OS=Homo sapiens OX=9606 GN=NME4 PE=1 SV=1
	Q9BQ67|GRWD1_HUMAN	107.97	11	2	2	49419	Glutamate-rich WD repeat-containing protein 1 OS=Homo sapiens OX=9606 GN=GRWD1 PE=1 SV=1
	Q9BRQ0|PYGO2_HUMAN	107.96	9	2	2	41244	Pygopus homolog 2 OS=Homo sapiens OX=9606 GN=PYGO2 PE=1 SV=2
	Q6P1N0-2|C2D1A_HUMAN	107.8	2	2	2	103934	Isoform 2 of Coiled-coil and C2 domain-containing protein 1A OS=Homo sapiens OX=9606 GN=CC2D1A
	P67936|TPM4_HUMAN	107.57	13	3	1	28522	Tropomyosin alpha-4 chain OS=Homo sapiens OX=9606 GN=TPM4 PE=1 SV=3
	Q8IWZ8|SUGP1_HUMAN	107.53	7	3	3	72471	SURP and G-patch domain-containing protein 1 OS=Homo sapiens OX=9606 GN=SUGP1 PE=1 SV=2
	P49755|TMEDA_HUMAN	107.5	12	2	2	24976	Transmembrane emp24 domain-containing protein 10 OS=Homo sapiens OX=9606 GN=TMED10 PE=1 SV=2
	Q9Y6H1|CHCH2_HUMAN	107.49	15	2	2	15513	Coiled-coil-helix-coiled-coil-helix domain-containing protein 2 OS=Homo sapiens OX=9606 GN=CHCHD2 PE=1 SV=1
	P45974-2|UBP5_HUMAN	107.13	7	5	5	93308	Isoform Short of Ubiquitin carboxyl-terminal hydrolase 5 OS=Homo sapiens OX=9606 GN=USP5
	O43426|SYNJ1_HUMAN	107.1	2	2	2	173102	Synaptojanin-1 OS=Homo sapiens OX=9606 GN=SYNJ1 PE=1 SV=2
	Q99618|CDCA3_HUMAN	107.09	9	2	2	28998	Cell division cycle-associated protein 3 OS=Homo sapiens OX=9606 GN=CDCA3 PE=1 SV=1
	P23511-2|NFYA_HUMAN	107.07	13	2	2	33939	Isoform Short of Nuclear transcription factor Y subunit alpha OS=Homo sapiens OX=9606 GN=NFYA
	Q99873-2|ANM1_HUMAN	107	9	3	3	39929	Isoform 2 of Protein arginine N-methyltransferase 1 OS=Homo sapiens OX=9606 GN=PRMT1
	P56192|SYMC_HUMAN	106.83	3	3	3	101116	Methionine--tRNA ligase cytoplasmic OS=Homo sapiens OX=9606 GN=MARS PE=1 SV=2
	O60678-2|ANM3_HUMAN	106.8	8	3	3	52902	Isoform 2 of Protein arginine N-methyltransferase 3 OS=Homo sapiens OX=9606 GN=PRMT3
	Q9Y5U2-2|TSSC4_HUMAN	106.71	12	3	3	27935	Isoform 2 of Protein TSSC4 OS=Homo sapiens OX=9606 GN=TSSC4
	Q6AI08|HEAT6_HUMAN	106.66	3	3	3	128781	HEAT repeat-containing protein 6 OS=Homo sapiens OX=9606 GN=HEATR6 PE=1 SV=1	645
	P27695|APEX1_HUMAN	106.47	10	3	3	35555	DNA-(apurinic or apyrimidinic site) lyase OS=Homo sapiens OX=9606 GN=APEX1 PE=1 SV=2
	P62266|RS23_HUMAN	106.11	29	4	4	15808	40S ribosomal protein S23 OS=Homo sapiens OX=9606 GN=RPS23 PE=1 SV=3
	A5D8V6|VP37C_HUMAN	105.89	9	3	3	38659	Vacuolar protein sorting-associated protein 37C OS=Homo sapiens OX=9606 GN=VPS37C PE=1 SV=2
	P83881|RL36A_HUMAN	105.72	32	4	4	12441	60S ribosomal protein L36a OS=Homo sapiens OX=9606 GN=RPL36A PE=1 SV=2
	P36551|HEM6_HUMAN	105.59	7	3	3	50152	Oxygen-dependent coproporphyrinogen-III oxidase mitochondrial OS=Homo sapiens OX=9606 GN=CPOX PE=1 SV=3
	P62318-2|SMD3_HUMAN	105.33	25	2	2	13292	Isoform 2 of Small nuclear ribonucleoprotein Sm D3 OS=Homo sapiens OX=9606 GN=SNRPD3
	Q9H832|UBE2Z_HUMAN	105.33	9	4	4	38210	Ubiquitin-conjugating enzyme E2 Z OS=Homo sapiens OX=9606 GN=UBE2Z PE=1 SV=2
	Q9HCC0-2|MCCB_HUMAN	105.23	5	2	2	57519	Isoform 2 of Methylcrotonoyl-CoA carboxylase beta chain mitochondrial OS=Homo sapiens OX=9606 GN=MCCC2
	Q9UIL1-3|SCOC_HUMAN	104.98	23	2	2	13857	Isoform 3 of Short coiled-coil protein OS=Homo sapiens OX=9606 GN=SCOC
	P06737-2|PYGL_HUMAN	104.8	4	3	3	93134	Isoform 2 of Glycogen phosphorylase liver form OS=Homo sapiens OX=9606 GN=PYGL
	Q9UKB3|DJC12_HUMAN	104.77	22	4	4	23415	DnaJ homolog subfamily C member 12 OS=Homo sapiens OX=9606 GN=DNAJC12 PE=1 SV=1
	O00483|NDUA4_HUMAN	104.65	25	2	2	9370	Cytochrome c oxidase subunit NDUFA4 OS=Homo sapiens OX=9606 GN=NDUFA4 PE=1 SV=1
	Q15836|VAMP3_HUMAN	104.55	23	2	2	11309	Vesicle-associated membrane protein 3 OS=Homo sapiens OX=9606 GN=VAMP3 PE=1 SV=3	66
	P40429|RL13A_HUMAN	104.53	15	3	3	23577	60S ribosomal protein L13a OS=Homo sapiens OX=9606 GN=RPL13A PE=1 SV=2
	P61088|UBE2N_HUMAN	104.46	22	3	3	17138	Ubiquitin-conjugating enzyme E2 N OS=Homo sapiens OX=9606 GN=UBE2N PE=1 SV=1
	Q08117|TLE5_HUMAN	104.33	11	2	2	21970	TLE family member 5 OS=Homo sapiens OX=9606 GN=TLE5 PE=1 SV=4
	Q99543-2|DNJC2_HUMAN	104.32	5	2	2	65914	Isoform 2 of DnaJ homolog subfamily C member 2 OS=Homo sapiens OX=9606 GN=DNAJC2
	P49247|RPIA_HUMAN	104.14	8	2	2	33269	Ribose-5-phosphate isomerase OS=Homo sapiens OX=9606 GN=RPIA PE=1 SV=3
	Q1KMD3|HNRL2_HUMAN	104.03	5	2	2	85105	Heterogeneous nuclear ribonucleoprotein U-like protein 2 OS=Homo sapiens OX=9606 GN=HNRNPUL2 PE=1 SV=1
	Q9NX14|NDUBB_HUMAN	103.98	22	2	2	17317	NADH dehydrogenase [ubiquinone] 1 beta subcomplex subunit 11 mitochondrial OS=Homo sapiens OX=9606 GN=NDUFB11 PE=1 SV=1
	P01889|HLAB_HUMAN	103.93	12	3	1	40460	HLA class I histocompatibility antigen B alpha chain OS=Homo sapiens OX=9606 GN=HLA-B PE=1 SV=3
	Q96GI7|FA89A_HUMAN	103.92	15	2	2	19569	Protein FAM89A OS=Homo sapiens OX=9606 GN=FAM89A PE=1 SV=1
	Q9BPX3|CND3_HUMAN	103.85	3	2	2	114334	Condensin complex subunit 3 OS=Homo sapiens OX=9606 GN=NCAPG PE=1 SV=1
	P20839-2|IMDH1_HUMAN	103.78	6	3	1	52598	Isoform 2 of Inosine-5'-monophosphate dehydrogenase 1 OS=Homo sapiens OX=9606 GN=IMPDH1
	O75554-2|WBP4_HUMAN	103.77	8	2	2	40030	Isoform 2 of WW domain-binding protein 4 OS=Homo sapiens OX=9606 GN=WBP4
	Q96DH6-2|MSI2H_HUMAN	103.69	9	2	1	28421	Isoform 2 of RNA-binding protein Musashi homolog 2 OS=Homo sapiens OX=9606 GN=MSI2
	P46940|IQGA1_HUMAN	103.57	1	1	1	189251	Ras GTPase-activating-like protein IQGAP1 OS=Homo sapiens OX=9606 GN=IQGAP1 PE=1 SV=1
	Q9NRF8|PYRG2_HUMAN	103.56	4	2	1	65678	CTP synthase 2 OS=Homo sapiens OX=9606 GN=CTPS2 PE=1 SV=1
	Q9Y6K9|NEMO_HUMAN	103.47	6	2	2	48198	NF-kappa-B essential modulator OS=Homo sapiens OX=9606 GN=IKBKG PE=1 SV=2
	Q9Y2L1|RRP44_HUMAN	103.4	3	2	2	109003	Exosome complex exonuclease RRP44 OS=Homo sapiens OX=9606 GN=DIS3 PE=1 SV=2
	P27144|KAD4_HUMAN	103.36	14	3	3	25268	Adenylate kinase 4 mitochondrial OS=Homo sapiens OX=9606 GN=AK4 PE=1 SV=1
	A0A2Z4LIS9|FXO3B_HUMAN	103.33	9	2	1	29900	Forkhead box protein O3B OS=Homo sapiens OX=9606 GN=FOXO3B PE=1 SV=1
	Q9H9P8-2|L2HDH_HUMAN	103.19	5	2	2	48505	Isoform 2 of L-2-hydroxyglutarate dehydrogenase mitochondrial OS=Homo sapiens OX=9606 GN=L2HGDH
	Q9BSV6|SEN34_HUMAN	103.14	9	2	2	33652	tRNA-splicing endonuclease subunit Sen34 OS=Homo sapiens OX=9606 GN=TSEN34 PE=1 SV=1
	P51572|BAP31_HUMAN	103.12	22	3	3	27992	B-cell receptor-associated protein 31 OS=Homo sapiens OX=9606 GN=BCAP31 PE=1 SV=3
	Q8WVJ2|NUDC2_HUMAN	103.05	18	2	2	17676	NudC domain-containing protein 2 OS=Homo sapiens OX=9606 GN=NUDCD2 PE=1 SV=1
	P49207|RL34_HUMAN	103.04	29	4	4	13293	60S ribosomal protein L34 OS=Homo sapiens OX=9606 GN=RPL34 PE=1 SV=3
	Q8WUX9|CHMP7_HUMAN	103.03	10	3	3	50911	Charged multivesicular body protein 7 OS=Homo sapiens OX=9606 GN=CHMP7 PE=1 SV=1
	Q99615|DNJC7_HUMAN	103.03	5	2	2	56441	DnaJ homolog subfamily C member 7 OS=Homo sapiens OX=9606 GN=DNAJC7 PE=1 SV=2
	P04080|CYTB_HUMAN	103.01	34	2	2	11140	Cystatin-B OS=Homo sapiens OX=9606 GN=CSTB PE=1 SV=2
	Q96RP9|EFGM_HUMAN	102.97	6	4	4	83472	Elongation factor G mitochondrial OS=Homo sapiens OX=9606 GN=GFM1 PE=1 SV=2
	Q9Y6M7-11|S4A7_HUMAN	102.91	6	2	2	52249	Isoform 11 of Sodium bicarbonate cotransporter 3 OS=Homo sapiens OX=9606 GN=SLC4A7
	P40123-3|CAP2_HUMAN	102.9	9	2	1	24018	Isoform 3 of Adenylyl cyclase-associated protein 2 OS=Homo sapiens OX=9606 GN=CAP2
	O75340-2|PDCD6_HUMAN	102.77	10	2	2	21664	Isoform 2 of Programmed cell death protein 6 OS=Homo sapiens OX=9606 GN=PDCD6
	Q16576|RBBP7_HUMAN	102.69	6	3	1	47820	Histone-binding protein RBBP7 OS=Homo sapiens OX=9606 GN=RBBP7 PE=1 SV=1
	Q6P1J9|CDC73_HUMAN	102.48	7	3	3	60577	Parafibromin OS=Homo sapiens OX=9606 GN=CDC73 PE=1 SV=1
	Q15654|TRIP6_HUMAN	102.47	5	2	2	50288	Thyroid receptor-interacting protein 6 OS=Homo sapiens OX=9606 GN=TRIP6 PE=1 SV=3	137
	Q5THK1-3|PR14L_HUMAN	102.37	3	2	2	135393	Isoform 3 of Protein PRR14L OS=Homo sapiens OX=9606 GN=PRR14L
	Q86WP2-3|GPBP1_HUMAN	102.31	5	2	2	52437	Isoform 3 of Vasculin OS=Homo sapiens OX=9606 GN=GPBP1
	P08559-3|ODPA_HUMAN	102.06	8	3	3	40188	Isoform 3 of Pyruvate dehydrogenase E1 component subunit alpha somatic form mitochondrial OS=Homo sapiens OX=9606 GN=PDHA1
	Q96P47|AGAP3_HUMAN	102.05	4	2	2	95044	Arf-GAP with GTPase ANK repeat and PH domain-containing protein 3 OS=Homo sapiens OX=9606 GN=AGAP3 PE=1 SV=2
	O76041-2|NEBL_HUMAN	101.99	14	3	2	31196	Isoform 2 of Nebulette OS=Homo sapiens OX=9606 GN=NEBL
	Q6VEQ5|WASH2_HUMAN	101.79	5	2	1	50312	WAS protein family homolog 2 OS=Homo sapiens OX=9606 GN=WASH2P PE=2 SV=2
	Q13247-3|SRSF6_HUMAN	101.75	8	3	3	38419	Isoform SRP55-3 of Serine/arginine-rich splicing factor 6 OS=Homo sapiens OX=9606 GN=SRSF6
	Q04727-2|TLE4_HUMAN	101.74	3	2	1	76581	Isoform 2 of Transducin-like enhancer protein 4 OS=Homo sapiens OX=9606 GN=TLE4
	P06730|IF4E_HUMAN	101.63	9	2	2	25097	Eukaryotic translation initiation factor 4E OS=Homo sapiens OX=9606 GN=EIF4E PE=1 SV=2
	Q14566|MCM6_HUMAN	101.62	3	2	2	92889	DNA replication licensing factor MCM6 OS=Homo sapiens OX=9606 GN=MCM6 PE=1 SV=1
	Q9Y2U8|MAN1_HUMAN	101.47	4	2	2	99997	Inner nuclear membrane protein Man1 OS=Homo sapiens OX=9606 GN=LEMD3 PE=1 SV=2	134
	Q9UKD1|GMEB2_HUMAN	101.45	5	3	3	56421	Glucocorticoid modulatory element-binding protein 2 OS=Homo sapiens OX=9606 GN=GMEB2 PE=1 SV=1
	P61956-2|SUMO2_HUMAN	101.43	31	2	2	8111	Isoform 2 of Small ubiquitin-related modifier 2 OS=Homo sapiens OX=9606 GN=SUMO2
	P14678-2|RSMB_HUMAN	101.31	13	4	4	23656	Isoform SM-B of Small nuclear ribonucleoprotein-associated proteins B and B' OS=Homo sapiens OX=9606 GN=SNRPB
	Q15054-3|DPOD3_HUMAN	101.31	7	2	2	39320	Isoform 3 of DNA polymerase delta subunit 3 OS=Homo sapiens OX=9606 GN=POLD3
	Q7Z4V5-2|HDGR2_HUMAN	101.29	3	2	1	74230	Isoform 2 of Hepatoma-derived growth factor-related protein 2 OS=Homo sapiens OX=9606 GN=HDGFL2
	P62910|RL32_HUMAN	101.27	15	2	2	15860	60S ribosomal protein L32 OS=Homo sapiens OX=9606 GN=RPL32 PE=1 SV=2
	Q9Y295|DRG1_HUMAN	101.25	13	3	3	40542	Developmentally-regulated GTP-binding protein 1 OS=Homo sapiens OX=9606 GN=DRG1 PE=1 SV=1
	O60504|VINEX_HUMAN	101.09	5	3	3	75341	Vinexin OS=Homo sapiens OX=9606 GN=SORBS3 PE=1 SV=2
	Q9NP66|HM20A_HUMAN	100.89	12	3	3	40144	High mobility group protein 20A OS=Homo sapiens OX=9606 GN=HMG20A PE=1 SV=1
	O94826|TOM70_HUMAN	100.77	8	4	4	67455	Mitochondrial import receptor subunit TOM70 OS=Homo sapiens OX=9606 GN=TOMM70 PE=1 SV=1
	P08574|CY1_HUMAN	100.76	7	2	2	35422	Cytochrome c1 heme protein mitochondrial OS=Homo sapiens OX=9606 GN=CYC1 PE=1 SV=3
	Q14011|CIRBP_HUMAN	100.73	15	2	2	18648	Cold-inducible RNA-binding protein OS=Homo sapiens OX=9606 GN=CIRBP PE=1 SV=1
	Q96KP4-2|CNDP2_HUMAN	100.55	8	2	2	43833	Isoform 2 of Cytosolic non-specific dipeptidase OS=Homo sapiens OX=9606 GN=CNDP2
	Q9UBV8|PEF1_HUMAN	100.45	7	2	2	30381	Peflin OS=Homo sapiens OX=9606 GN=PEF1 PE=1 SV=1
	Q9Y6E2|BZW2_HUMAN	100.39	6	2	2	48162	Basic leucine zipper and W2 domain-containing protein 2 OS=Homo sapiens OX=9606 GN=BZW2 PE=1 SV=1
	O00170|AIP_HUMAN	100.36	12	3	3	37636	AH receptor-interacting protein OS=Homo sapiens OX=9606 GN=AIP PE=1 SV=2
	Q8N5N7-2|RM50_HUMAN	100.31	23	2	2	15524	Isoform 2 of 39S ribosomal protein L50 mitochondrial OS=Homo sapiens OX=9606 GN=MRPL50
	Q00535|CDK5_HUMAN	100.25	8	3	2	33304	Cyclin-dependent-like kinase 5 OS=Homo sapiens OX=9606 GN=CDK5 PE=1 SV=3
	P42785|PCP_HUMAN	100.19	5	2	2	55800	Lysosomal Pro-X carboxypeptidase OS=Homo sapiens OX=9606 GN=PRCP PE=1 SV=1
	P63151|2ABA_HUMAN	100.15	5	2	2	51692	Serine/threonine-protein phosphatase 2A 55 kDa regulatory subunit B alpha isoform OS=Homo sapiens OX=9606 GN=PPP2R2A PE=1 SV=1
	P00367-3|DHE3_HUMAN	100.02	7	3	3	46575	Isoform 3 of Glutamate dehydrogenase 1 mitochondrial OS=Homo sapiens OX=9606 GN=GLUD1
	Q9Y3U8|RL36_HUMAN	99.89	20	2	2	12254	60S ribosomal protein L36 OS=Homo sapiens OX=9606 GN=RPL36 PE=1 SV=3
	Q13098-5|CSN1_HUMAN	99.84	7	3	3	55093	Isoform 4 of COP9 signalosome complex subunit 1 OS=Homo sapiens OX=9606 GN=GPS1
	O95983-2|MBD3_HUMAN	99.22	14	3	3	29014	Isoform 2 of Methyl-CpG-binding domain protein 3 OS=Homo sapiens OX=9606 GN=MBD3
	P00441|SODC_HUMAN	99.17	14	2	2	15936	Superoxide dismutase [Cu-Zn] OS=Homo sapiens OX=9606 GN=SOD1 PE=1 SV=2
	P34897-3|GLYM_HUMAN	99.11	6	3	3	53455	Isoform 3 of Serine hydroxymethyltransferase mitochondrial OS=Homo sapiens OX=9606 GN=SHMT2
	O75832|PSD10_HUMAN	99.06	19	3	3	24428	26S proteasome non-ATPase regulatory subunit 10 OS=Homo sapiens OX=9606 GN=PSMD10 PE=1 SV=1
	Q9NQW7-2|XPP1_HUMAN	98.79	5	2	2	67227	Isoform 2 of Xaa-Pro aminopeptidase 1 OS=Homo sapiens OX=9606 GN=XPNPEP1
	Q3YEC7|RABL6_HUMAN	98.69	6	3	3	79549	Rab-like protein 6 OS=Homo sapiens OX=9606 GN=RABL6 PE=1 SV=2
	P35612|ADDB_HUMAN	98.64	6	4	3	80854	Beta-adducin OS=Homo sapiens OX=9606 GN=ADD2 PE=1 SV=3
	P11908|PRPS2_HUMAN	98.63	11	3	1	34769	Ribose-phosphate pyrophosphokinase 2 OS=Homo sapiens OX=9606 GN=PRPS2 PE=1 SV=2
	Q92499|DDX1_HUMAN	98.62	4	2	2	82432	ATP-dependent RNA helicase DDX1 OS=Homo sapiens OX=9606 GN=DDX1 PE=1 SV=2
	Q9NYZ3|GTSE1_HUMAN	98.57	4	2	2	76645	G2 and S phase-expressed protein 1 OS=Homo sapiens OX=9606 GN=GTSE1 PE=1 SV=3
	O75223|GGCT_HUMAN	98.34	12	2	2	21008	Gamma-glutamylcyclotransferase OS=Homo sapiens OX=9606 GN=GGCT PE=1 SV=1
	Q07955|SRSF1_HUMAN	98.31	9	2	2	27745	Serine/arginine-rich splicing factor 1 OS=Homo sapiens OX=9606 GN=SRSF1 PE=1 SV=2
	Q00765|REEP5_HUMAN	98.21	16	3	3	21493	Receptor expression-enhancing protein 5 OS=Homo sapiens OX=9606 GN=REEP5 PE=1 SV=3
	Q9UBS0|KS6B2_HUMAN	98.16	4	2	2	53455	Ribosomal protein S6 kinase beta-2 OS=Homo sapiens OX=9606 GN=RPS6KB2 PE=1 SV=2
	P62191|PRS4_HUMAN	98.11	9	3	2	49185	26S proteasome regulatory subunit 4 OS=Homo sapiens OX=9606 GN=PSMC1 PE=1 SV=1
	P50552|VASP_HUMAN	98.07	6	2	2	39830	Vasodilator-stimulated phosphoprotein OS=Homo sapiens OX=9606 GN=VASP PE=1 SV=3
	P09132|SRP19_HUMAN	98.02	19	2	2	16156	Signal recognition particle 19 kDa protein OS=Homo sapiens OX=9606 GN=SRP19 PE=1 SV=3
	P49069|CAMLG_HUMAN	97.95	7	1	1	32953	Calcium signal-modulating cyclophilin ligand OS=Homo sapiens OX=9606 GN=CAMLG PE=1 SV=1
	O95563|MPC2_HUMAN	97.81	17	2	2	14279	Mitochondrial pyruvate carrier 2 OS=Homo sapiens OX=9606 GN=MPC2 PE=1 SV=1
	P30085|KCY_HUMAN	97.72	20	3	3	22222	UMP-CMP kinase OS=Homo sapiens OX=9606 GN=CMPK1 PE=1 SV=3
	P04179-3|SODM_HUMAN	97.67	13	2	2	18262	Isoform 3 of Superoxide dismutase [Mn] mitochondrial OS=Homo sapiens OX=9606 GN=SOD2
	Q9BSD7|NTPCR_HUMAN	97.63	16	2	2	20713	Cancer-related nucleoside-triphosphatase OS=Homo sapiens OX=9606 GN=NTPCR PE=1 SV=1
	Q14669|TRIPC_HUMAN	97.51	1	2	2	220432	E3 ubiquitin-protein ligase TRIP12 OS=Homo sapiens OX=9606 GN=TRIP12 PE=1 SV=1
	Q6P2H3-2|CEP85_HUMAN	97.44	4	2	2	85568	Isoform 2 of Centrosomal protein of 85 kDa OS=Homo sapiens OX=9606 GN=CEP85
	P48735-2|IDHP_HUMAN	97.42	5	2	1	45180	Isoform 2 of Isocitrate dehydrogenase [NADP] mitochondrial OS=Homo sapiens OX=9606 GN=IDH2
	P04150-7|GCR_HUMAN	97.41	7	3	3	60602	Isoform GR-A beta of Glucocorticoid receptor OS=Homo sapiens OX=9606 GN=NR3C1
	P00568|KAD1_HUMAN	97.36	18	3	3	21635	Adenylate kinase isoenzyme 1 OS=Homo sapiens OX=9606 GN=AK1 PE=1 SV=3
	P31689-2|DNJA1_HUMAN	97.34	8	2	2	37045	Isoform 2 of DnaJ homolog subfamily A member 1 OS=Homo sapiens OX=9606 GN=DNAJA1
	P06732|KCRM_HUMAN	97.3	10	2	1	43101	Creatine kinase M-type OS=Homo sapiens OX=9606 GN=CKM PE=1 SV=2
	P60953|CDC42_HUMAN	97.29	14	2	2	21259	Cell division control protein 42 homolog OS=Homo sapiens OX=9606 GN=CDC42 PE=1 SV=2
	P36776-2|LONM_HUMAN	97.03	3	3	3	100397	Isoform 2 of Lon protease homolog mitochondrial OS=Homo sapiens OX=9606 GN=LONP1
	Q92530|PSMF1_HUMAN	96.96	10	2	2	29817	Proteasome inhibitor PI31 subunit OS=Homo sapiens OX=9606 GN=PSMF1 PE=1 SV=2
	Q9BTK6|PAGR1_HUMAN	96.62	16	1	1	27716	PAXIP1-associated glutamate-rich protein 1 OS=Homo sapiens OX=9606 GN=PAGR1 PE=1 SV=1
	O14519-2|CDKA1_HUMAN	96.55	26	2	2	9601	Isoform 2 of Cyclin-dependent kinase 2-associated protein 1 OS=Homo sapiens OX=9606 GN=CDK2AP1
	Q719H9|KCTD1_HUMAN	96.5	9	2	1	29405	BTB/POZ domain-containing protein KCTD1 OS=Homo sapiens OX=9606 GN=KCTD1 PE=1 SV=1
	P49748-2|ACADV_HUMAN	96.46	11	5	5	68058	Isoform 2 of Very long-chain specific acyl-CoA dehydrogenase mitochondrial OS=Homo sapiens OX=9606 GN=ACADVL
	Q8WWH5|TRUB1_HUMAN	96.46	9	3	3	37253	Probable tRNA pseudouridine synthase 1 OS=Homo sapiens OX=9606 GN=TRUB1 PE=1 SV=1
	Q96E29-3|MTEF3_HUMAN	96.44	7	2	2	34358	Isoform 3 of Transcription termination factor 3 mitochondrial OS=Homo sapiens OX=9606 GN=MTERF3
	Q5VYK3|ECM29_HUMAN	96.41	2	3	3	204289	Proteasome adapter and scaffold protein ECM29 OS=Homo sapiens OX=9606 GN=ECPAS PE=1 SV=2
	Q16143|SYUB_HUMAN	96.29	16	2	1	14288	Beta-synuclein OS=Homo sapiens OX=9606 GN=SNCB PE=1 SV=1
	Q9UHY1|NRBP_HUMAN	96.29	4	2	2	59845	Nuclear receptor-binding protein OS=Homo sapiens OX=9606 GN=NRBP1 PE=1 SV=1
	Q08209-3|PP2BA_HUMAN	96.27	5	2	2	52672	Isoform 3 of Serine/threonine-protein phosphatase 2B catalytic subunit alpha isoform OS=Homo sapiens OX=9606 GN=PPP3CA
	Q96HR8-2|NAF1_HUMAN	96.24	5	2	2	41895	Isoform 2 of H/ACA ribonucleoprotein complex non-core subunit NAF1 OS=Homo sapiens OX=9606 GN=NAF1
	Q7L5N1|CSN6_HUMAN	96.23	11	3	3	36163	COP9 signalosome complex subunit 6 OS=Homo sapiens OX=9606 GN=COPS6 PE=1 SV=1
	Q9UPN9-2|TRI33_HUMAN	96.16	2	2	2	120541	Isoform Beta of E3 ubiquitin-protein ligase TRIM33 OS=Homo sapiens OX=9606 GN=TRIM33
	Q9NQX3|GEPH_HUMAN	96.1	4	2	2	79748	Gephyrin OS=Homo sapiens OX=9606 GN=GPHN PE=1 SV=1
	Q9Y678|COPG1_HUMAN	96.07	3	2	1	97718	Coatomer subunit gamma-1 OS=Homo sapiens OX=9606 GN=COPG1 PE=1 SV=1
	P49458|SRP09_HUMAN	95.71	23	2	2	10112	Signal recognition particle 9 kDa protein OS=Homo sapiens OX=9606 GN=SRP9 PE=1 SV=2
	Q6FIF0-2|ZFAN6_HUMAN	95.71	17	2	2	21396	Isoform 2 of AN1-type zinc finger protein 6 OS=Homo sapiens OX=9606 GN=ZFAND6
	P43686|PRS6B_HUMAN	95.37	9	2	2	47366	26S proteasome regulatory subunit 6B OS=Homo sapiens OX=9606 GN=PSMC4 PE=1 SV=2
	Q13227-2|GPS2_HUMAN	95.31	11	4	4	33907	Isoform 2 of G protein pathway suppressor 2 OS=Homo sapiens OX=9606 GN=GPS2
	Q9HAV4|XPO5_HUMAN	95.3	3	3	3	136311	Exportin-5 OS=Homo sapiens OX=9606 GN=XPO5 PE=1 SV=1
	Q9BVC5|ASHWN_HUMAN	95.15	13	2	2	25858	Ashwin OS=Homo sapiens OX=9606 GN=C2orf49 PE=1 SV=1	163
	P43694|GATA4_HUMAN	94.95	4	1	1	44565	Transcription factor GATA-4 OS=Homo sapiens OX=9606 GN=GATA4 PE=1 SV=2
	Q9ULX6|AKP8L_HUMAN	94.91	4	2	2	71640	A-kinase anchor protein 8-like OS=Homo sapiens OX=9606 GN=AKAP8L PE=1 SV=4
	P58546|MTPN_HUMAN	94.75	14	1	1	12895	Myotrophin OS=Homo sapiens OX=9606 GN=MTPN PE=1 SV=2
	Q9P0L0|VAPA_HUMAN	94.73	11	3	2	27893	Vesicle-associated membrane protein-associated protein A OS=Homo sapiens OX=9606 GN=VAPA PE=1 SV=3	211
	Q15398-1|DLGP5_HUMAN	94.59	3	2	2	85668	Isoform 2 of Disks large-associated protein 5 OS=Homo sapiens OX=9606 GN=DLGAP5
	Q6ZTU2-5|E400N_HUMAN	94.58	7	1	1	38305	Isoform 4 of Putative EP400-like protein OS=Homo sapiens OX=9606 GN=EP400P1
	P55265-3|DSRAD_HUMAN	94.48	2	2	2	131170	Isoform 3 of Double-stranded RNA-specific adenosine deaminase OS=Homo sapiens OX=9606 GN=ADAR	656
	Q00610-2|CLH1_HUMAN	94.34	1	2	2	187889	Isoform 2 of Clathrin heavy chain 1 OS=Homo sapiens OX=9606 GN=CLTC
	O15357|SHIP2_HUMAN	94.32	2	2	2	138599	Phosphatidylinositol 3 4 5-trisphosphate 5-phosphatase 2 OS=Homo sapiens OX=9606 GN=INPPL1 PE=1 SV=2
	Q92769-3|HDAC2_HUMAN	94.31	7	2	2	51999	Isoform 2 of Histone deacetylase 2 OS=Homo sapiens OX=9606 GN=HDAC2
	Q7L804|RFIP2_HUMAN	94.28	7	3	1	58279	Rab11 family-interacting protein 2 OS=Homo sapiens OX=9606 GN=RAB11FIP2 PE=1 SV=1
	Q9Y2S7|PDIP2_HUMAN	94.24	6	2	2	42033	Polymerase delta-interacting protein 2 OS=Homo sapiens OX=9606 GN=POLDIP2 PE=1 SV=1
	Q5VTB9-3|RN220_HUMAN	94.16	7	2	2	39570	Isoform 2 of E3 ubiquitin-protein ligase RNF220 OS=Homo sapiens OX=9606 GN=RNF220
	P24539|AT5F1_HUMAN	94.06	5	1	1	28909	ATP synthase F(0) complex subunit B1 mitochondrial OS=Homo sapiens OX=9606 GN=ATP5PB PE=1 SV=2
	Q3MHD2|LSM12_HUMAN	93.95	12	2	2	21701	Protein LSM12 homolog OS=Homo sapiens OX=9606 GN=LSM12 PE=1 SV=2	37, 86
	P49720|PSB3_HUMAN	93.86	15	2	2	22949	Proteasome subunit beta type-3 OS=Homo sapiens OX=9606 GN=PSMB3 PE=1 SV=2
	P55347-2|PKNX1_HUMAN	93.78	4	1	1	44629	Isoform 2 of Homeobox protein PKNOX1 OS=Homo sapiens OX=9606 GN=PKNOX1
	P22307-6|NLTP_HUMAN	93.66	14	2	2	15079	Isoform 6 of Non-specific lipid-transfer protein OS=Homo sapiens OX=9606 GN=SCP2
	P0DMN0|ST1A4_HUMAN	93.57	6	2	2	34196	Sulfotransferase 1A4 OS=Homo sapiens OX=9606 GN=SULT1A4 PE=1 SV=1
	Q8NBF6-2|AVL9_HUMAN	93.56	4	2	2	65313	Isoform 2 of Late secretory pathway protein AVL9 homolog OS=Homo sapiens OX=9606 GN=AVL9	565
	Q9NUQ3|TXLNG_HUMAN	93.42	8	4	3	60586	Gamma-taxilin OS=Homo sapiens OX=9606 GN=TXLNG PE=1 SV=2
	O00505|IMA4_HUMAN	92.94	4	2	2	57811	Importin subunit alpha-4 OS=Homo sapiens OX=9606 GN=KPNA3 PE=1 SV=2
	O14617-4|AP3D1_HUMAN	92.93	3	2	2	114707	Isoform 4 of AP-3 complex subunit delta-1 OS=Homo sapiens OX=9606 GN=AP3D1
	Q02750-2|MP2K1_HUMAN	92.82	11	3	1	40764	Isoform 2 of Dual specificity mitogen-activated protein kinase kinase 1 OS=Homo sapiens OX=9606 GN=MAP2K1
	P30040|ERP29_HUMAN	92.78	8	2	2	28993	Endoplasmic reticulum resident protein 29 OS=Homo sapiens OX=9606 GN=ERP29 PE=1 SV=4
	P46779|RL28_HUMAN	92.78	16	2	2	15747	60S ribosomal protein L28 OS=Homo sapiens OX=9606 GN=RPL28 PE=1 SV=3
	Q7Z4Q2-2|HEAT3_HUMAN	92.78	5	2	2	65813	Isoform 2 of HEAT repeat-containing protein 3 OS=Homo sapiens OX=9606 GN=HEATR3
	O14893-3|GEMI2_HUMAN	92.71	8	2	2	28155	Isoform 3 of Gem-associated protein 2 OS=Homo sapiens OX=9606 GN=GEMIN2
	P10515|ODP2_HUMAN	92.71	7	2	2	68997	Dihydrolipoyllysine-residue acetyltransferase component of pyruvate dehydrogenase complex mitochondrial OS=Homo sapiens OX=9606 GN=DLAT PE=1 SV=3
	P60228|EIF3E_HUMAN	92.63	6	3	3	52221	Eukaryotic translation initiation factor 3 subunit E OS=Homo sapiens OX=9606 GN=EIF3E PE=1 SV=1
	O43379|WDR62_HUMAN	92.39	1	1	1	165953	WD repeat-containing protein 62 OS=Homo sapiens OX=9606 GN=WDR62 PE=1 SV=4
	Q9NVR5|KTU_HUMAN	92.38	4	2	2	91114	Protein kintoun OS=Homo sapiens OX=9606 GN=DNAAF2 PE=1 SV=2
	Q7L1Q6|BZW1_HUMAN	92.32	7	3	3	48043	Basic leucine zipper and W2 domain-containing protein 1 OS=Homo sapiens OX=9606 GN=BZW1 PE=1 SV=1
	Q9NR45|SIAS_HUMAN	92.32	8	2	2	40308	Sialic acid synthase OS=Homo sapiens OX=9606 GN=NANS PE=1 SV=2
	Q9NVI1-1|FANCI_HUMAN	92.28	2	2	2	142569	Isoform 1 of Fanconi anemia group I protein OS=Homo sapiens OX=9606 GN=FANCI
	P62195-2|PRS8_HUMAN	91.97	5	2	1	44784	Isoform 2 of 26S proteasome regulatory subunit 8 OS=Homo sapiens OX=9606 GN=PSMC5
	Q13330-3|MTA1_HUMAN	91.87	4	2	2	79192	Isoform 3 of Metastasis-associated protein MTA1 OS=Homo sapiens OX=9606 GN=MTA1
	Q86TB9|PATL1_HUMAN	91.86	4	3	3	86850	Protein PAT1 homolog 1 OS=Homo sapiens OX=9606 GN=PATL1 PE=1 SV=2
	Q13409-5|DC1I2_HUMAN	91.83	3	1	1	71328	Isoform 2E of Cytoplasmic dynein 1 intermediate chain 2 OS=Homo sapiens OX=9606 GN=DYNC1I2
	P08579|RU2B_HUMAN	91.82	16	3	3	25486	U2 small nuclear ribonucleoprotein B'' OS=Homo sapiens OX=9606 GN=SNRPB2 PE=1 SV=1
	Q13043|STK4_HUMAN	91.57	7	2	2	55630	Serine/threonine-protein kinase 4 OS=Homo sapiens OX=9606 GN=STK4 PE=1 SV=2
	Q9NRA8|4ET_HUMAN	91.53	4	3	3	108201	Eukaryotic translation initiation factor 4E transporter OS=Homo sapiens OX=9606 GN=EIF4ENIF1 PE=1 SV=2
	Q12846-2|STX4_HUMAN	91.51	6	1	1	33841	Isoform 2 of Syntaxin-4 OS=Homo sapiens OX=9606 GN=STX4
	P11766|ADHX_HUMAN	91.38	7	2	2	39724	Alcohol dehydrogenase class-3 OS=Homo sapiens OX=9606 GN=ADH5 PE=1 SV=4
	Q15370|ELOB_HUMAN	91.38	17	2	2	13133	Elongin-B OS=Homo sapiens OX=9606 GN=ELOB PE=1 SV=1
	P30260|CDC27_HUMAN	91.33	5	4	4	91867	Cell division cycle protein 27 homolog OS=Homo sapiens OX=9606 GN=CDC27 PE=1 SV=2
	Q15437|SC23B_HUMAN	91.2	3	2	1	86479	Protein transport protein Sec23B OS=Homo sapiens OX=9606 GN=SEC23B PE=1 SV=2
	O14618|CCS_HUMAN	91.02	8	2	2	29041	Copper chaperone for superoxide dismutase OS=Homo sapiens OX=9606 GN=CCS PE=1 SV=1
	Q9UGV2-3|NDRG3_HUMAN	90.97	9	2	2	31484	Isoform 3 of Protein NDRG3 OS=Homo sapiens OX=9606 GN=NDRG3	88
	O43164-2|PJA2_HUMAN	90.88	3	1	1	76091	Isoform 2 of E3 ubiquitin-protein ligase Praja-2 OS=Homo sapiens OX=9606 GN=PJA2
	P36871|PGM1_HUMAN	90.77	3	1	1	61449	Phosphoglucomutase-1 OS=Homo sapiens OX=9606 GN=PGM1 PE=1 SV=3
	Q86UK7-2|ZN598_HUMAN	90.77	5	3	3	97806	Isoform 2 of E3 ubiquitin-protein ligase ZNF598 OS=Homo sapiens OX=9606 GN=ZNF598
	Q9HB40|RISC_HUMAN	90.66	6	3	3	50831	Retinoid-inducible serine carboxypeptidase OS=Homo sapiens OX=9606 GN=SCPEP1 PE=1 SV=1
	Q9H9A6|LRC40_HUMAN	90.49	5	2	2	68250	Leucine-rich repeat-containing protein 40 OS=Homo sapiens OX=9606 GN=LRRC40 PE=1 SV=1
	O60869-2|EDF1_HUMAN	90.43	11	1	1	15481	Isoform 2 of Endothelial differentiation-related factor 1 OS=Homo sapiens OX=9606 GN=EDF1
	Q8NCW5-2|NNRE_HUMAN	90.42	16	2	2	20431	Isoform 2 of NAD(P)H-hydrate epimerase OS=Homo sapiens OX=9606 GN=NAXE
	Q9NYV4-2|CDK12_HUMAN	90.42	1	2	1	163227	Isoform 2 of Cyclin-dependent kinase 12 OS=Homo sapiens OX=9606 GN=CDK12
	Q8IXM2|BAP18_HUMAN	90.41	20	2	2	17900	Chromatin complexes subunit BAP18 OS=Homo sapiens OX=9606 GN=BAP18 PE=1 SV=1
	Q16222-2|UAP1_HUMAN	90.33	6	3	3	57028	Isoform AGX1 of UDP-N-acetylhexosamine pyrophosphorylase OS=Homo sapiens OX=9606 GN=UAP1
	Q13541|4EBP1_HUMAN	90.32	32	2	2	12580	Eukaryotic translation initiation factor 4E-binding protein 1 OS=Homo sapiens OX=9606 GN=EIF4EBP1 PE=1 SV=3
	P42694|HELZ_HUMAN	90.26	1	2	2	218968	Probable helicase with zinc finger domain OS=Homo sapiens OX=9606 GN=HELZ PE=1 SV=2
	Q99798|ACON_HUMAN	90.18	3	2	2	85425	Aconitate hydratase mitochondrial OS=Homo sapiens OX=9606 GN=ACO2 PE=1 SV=2
	Q9UNH7|SNX6_HUMAN	90.18	8	3	2	46649	Sorting nexin-6 OS=Homo sapiens OX=9606 GN=SNX6 PE=1 SV=1
	Q9UK59|DBR1_HUMAN	90.17	4	2	2	61555	Lariat debranching enzyme OS=Homo sapiens OX=9606 GN=DBR1 PE=1 SV=2
	O43251-6|RFOX2_HUMAN	90.1	8	2	2	47215	Isoform 6 of RNA binding protein fox-1 homolog 2 OS=Homo sapiens OX=9606 GN=RBFOX2
	P13164|IFM1_HUMAN	90.1	13	1	1	13964	Interferon-induced transmembrane protein 1 OS=Homo sapiens OX=9606 GN=IFITM1 PE=1 SV=3
	Q13158|FADD_HUMAN	90.08	15	2	2	23279	FAS-associated death domain protein OS=Homo sapiens OX=9606 GN=FADD PE=1 SV=1
	Q9UNE7-2|CHIP_HUMAN	89.98	10	2	2	27067	Isoform 2 of E3 ubiquitin-protein ligase CHIP OS=Homo sapiens OX=9606 GN=STUB1
	P78417|GSTO1_HUMAN	89.95	10	2	2	27566	Glutathione S-transferase omega-1 OS=Homo sapiens OX=9606 GN=GSTO1 PE=1 SV=2
	Q9BSH4|TACO1_HUMAN	89.75	12	3	3	32477	Translational activator of cytochrome c oxidase 1 OS=Homo sapiens OX=9606 GN=TACO1 PE=1 SV=1
	O76094-2|SRP72_HUMAN	89.74	3	1	1	67880	Isoform 2 of Signal recognition particle subunit SRP72 OS=Homo sapiens OX=9606 GN=SRP72
	Q96F24-3|NRBF2_HUMAN	89.54	4	1	1	31001	Isoform 3 of Nuclear receptor-binding factor 2 OS=Homo sapiens OX=9606 GN=NRBF2
	P61221|ABCE1_HUMAN	89.41	5	2	2	67314	ATP-binding cassette sub-family E member 1 OS=Homo sapiens OX=9606 GN=ABCE1 PE=1 SV=1
	P13995-2|MTDC_HUMAN	89.34	18	3	3	26849	Isoform 2 of Bifunctional methylenetetrahydrofolate dehydrogenase/cyclohydrolase mitochondrial OS=Homo sapiens OX=9606 GN=MTHFD2
	Q86V48-2|LUZP1_HUMAN	89.2	3	2	2	114588	Isoform 2 of Leucine zipper protein 1 OS=Homo sapiens OX=9606 GN=LUZP1
	Q9BYN8|RT26_HUMAN	89.14	18	3	3	24212	28S ribosomal protein S26 mitochondrial OS=Homo sapiens OX=9606 GN=MRPS26 PE=1 SV=1
	P16930-2|FAAA_HUMAN	89.11	7	2	2	38614	Isoform 2 of Fumarylacetoacetase OS=Homo sapiens OX=9606 GN=FAH
	P62304|RUXE_HUMAN	89.08	25	2	2	10804	Small nuclear ribonucleoprotein E OS=Homo sapiens OX=9606 GN=SNRPE PE=1 SV=1
	Q5T1V6-2|DDX59_HUMAN	89.04	4	2	2	64572	Isoform 2 of Probable ATP-dependent RNA helicase DDX59 OS=Homo sapiens OX=9606 GN=DDX59
	Q9H082|RB33B_HUMAN	89.04	10	2	1	25717	Ras-related protein Rab-33B OS=Homo sapiens OX=9606 GN=RAB33B PE=1 SV=1
	P29084|T2EB_HUMAN	89.01	7	2	2	33044	Transcription initiation factor IIE subunit beta OS=Homo sapiens OX=9606 GN=GTF2E2 PE=1 SV=1
	Q9BRA2|TXD17_HUMAN	89.01	11	1	1	13941	Thioredoxin domain-containing protein 17 OS=Homo sapiens OX=9606 GN=TXNDC17 PE=1 SV=1
	Q9UEU0|VTI1B_HUMAN	88.9	13	2	2	26688	Vesicle transport through interaction with t-SNAREs homolog 1B OS=Homo sapiens OX=9606 GN=VTI1B PE=1 SV=3
	P15374|UCHL3_HUMAN	88.88	16	2	2	26183	Ubiquitin carboxyl-terminal hydrolase isozyme L3 OS=Homo sapiens OX=9606 GN=UCHL3 PE=1 SV=1
	Q9UNH6|SNX7_HUMAN	88.84	7	3	3	45303	Sorting nexin-7 OS=Homo sapiens OX=9606 GN=SNX7 PE=1 SV=1
	A6NKD9|CC85C_HUMAN	88.81	5	1	1	45210	Coiled-coil domain-containing protein 85C OS=Homo sapiens OX=9606 GN=CCDC85C PE=1 SV=1
	P24928|RPB1_HUMAN	88.79	1	1	1	217174	DNA-directed RNA polymerase II subunit RPB1 OS=Homo sapiens OX=9606 GN=POLR2A PE=1 SV=2	1908
	Q15788-3|NCOA1_HUMAN	88.73	3	2	2	156628	Isoform 3 of Nuclear receptor coactivator 1 OS=Homo sapiens OX=9606 GN=NCOA1
	P30825|CTR1_HUMAN	88.66	4	2	2	67638	High affinity cationic amino acid transporter 1 OS=Homo sapiens OX=9606 GN=SLC7A1 PE=1 SV=1
	Q92785|REQU_HUMAN	88.64	6	2	2	44156	Zinc finger protein ubi-d4 OS=Homo sapiens OX=9606 GN=DPF2 PE=1 SV=2
	Q96FW1|OTUB1_HUMAN	88.43	11	2	2	31284	Ubiquitin thioesterase OTUB1 OS=Homo sapiens OX=9606 GN=OTUB1 PE=1 SV=2
	P17812|PYRG1_HUMAN	88.42	4	2	2	66690	CTP synthase 1 OS=Homo sapiens OX=9606 GN=CTPS1 PE=1 SV=2
	Q9UQR1|ZN148_HUMAN	88.42	3	3	3	88976	Zinc finger protein 148 OS=Homo sapiens OX=9606 GN=ZNF148 PE=1 SV=2
	P17482|HXB9_HUMAN	88.41	8	2	2	28059	Homeobox protein Hox-B9 OS=Homo sapiens OX=9606 GN=HOXB9 PE=1 SV=2
	Q92925-3|SMRD2_HUMAN	88.34	4	1	1	55239	Isoform 3 of SWI/SNF-related matrix-associated actin-dependent regulator of chromatin subfamily D member 2 OS=Homo sapiens OX=9606 GN=SMARCD2
	Q9BQC3-2|DPH2_HUMAN	88.31	11	2	2	27529	Isoform 2 of 2-(3-amino-3-carboxypropyl)histidine synthase subunit 2 OS=Homo sapiens OX=9606 GN=DPH2
	Q9NYJ8-2|TAB2_HUMAN	88.3	3	1	1	58131	Isoform 2 of TGF-beta-activated kinase 1 and MAP3K7-binding protein 2 OS=Homo sapiens OX=9606 GN=TAB2
	Q9BV19|CA050_HUMAN	88.19	8	1	1	21877	Uncharacterized protein C1orf50 OS=Homo sapiens OX=9606 GN=C1orf50 PE=1 SV=2
	P00387-2|NB5R3_HUMAN	88.18	12	3	3	31629	Isoform 2 of NADH-cytochrome b5 reductase 3 OS=Homo sapiens OX=9606 GN=CYB5R3
	Q96EV2|RBM33_HUMAN	88.1	2	2	2	129986	RNA-binding protein 33 OS=Homo sapiens OX=9606 GN=RBM33 PE=1 SV=3
	Q9BSJ8|ESYT1_HUMAN	88.09	3	2	2	122856	Extended synaptotagmin-1 OS=Homo sapiens OX=9606 GN=ESYT1 PE=1 SV=1
	Q6NW29|RWDD4_HUMAN	87.91	10	2	2	21251	RWD domain-containing protein 4 OS=Homo sapiens OX=9606 GN=RWDD4 PE=1 SV=3
	O75694-2|NU155_HUMAN	87.89	2	2	2	149016	Isoform 2 of Nuclear pore complex protein Nup155 OS=Homo sapiens OX=9606 GN=NUP155
	Q15038-3|DAZP2_HUMAN	87.86	38	2	2	13987	Isoform 3 of DAZ-associated protein 2 OS=Homo sapiens OX=9606 GN=DAZAP2
	Q9P206|K1522_HUMAN	87.84	3	2	2	107095	Uncharacterized protein KIAA1522 OS=Homo sapiens OX=9606 GN=KIAA1522 PE=1 SV=2
	P10606|COX5B_HUMAN	87.83	25	3	3	13696	Cytochrome c oxidase subunit 5B mitochondrial OS=Homo sapiens OX=9606 GN=COX5B PE=1 SV=2
	Q9P260|RELCH_HUMAN	87.82	3	3	3	134630	RAB11-binding protein RELCH OS=Homo sapiens OX=9606 GN=RELCH PE=1 SV=2
	O60884|DNJA2_HUMAN	87.78	15	5	5	45746	DnaJ homolog subfamily A member 2 OS=Homo sapiens OX=9606 GN=DNAJA2 PE=1 SV=1
	Q00536|CDK16_HUMAN	87.74	4	2	1	55716	Cyclin-dependent kinase 16 OS=Homo sapiens OX=9606 GN=CDK16 PE=1 SV=1
	Q8N0U8|VKORL_HUMAN	87.57	11	2	2	19836	Vitamin K epoxide reductase complex subunit 1-like protein 1 OS=Homo sapiens OX=9606 GN=VKORC1L1 PE=1 SV=2
	P07711|CATL1_HUMAN	87.53	6	2	2	37564	Cathepsin L1 OS=Homo sapiens OX=9606 GN=CTSL PE=1 SV=2
	P37108|SRP14_HUMAN	87.47	16	2	2	14570	Signal recognition particle 14 kDa protein OS=Homo sapiens OX=9606 GN=SRP14 PE=1 SV=2
	O43752|STX6_HUMAN	87.46	12	2	2	29176	Syntaxin-6 OS=Homo sapiens OX=9606 GN=STX6 PE=1 SV=1
	O15234|CASC3_HUMAN	87.33	3	2	2	76278	Protein CASC3 OS=Homo sapiens OX=9606 GN=CASC3 PE=1 SV=2
	Q16658|FSCN1_HUMAN	87.3	4	2	2	54530	Fascin OS=Homo sapiens OX=9606 GN=FSCN1 PE=1 SV=3
	Q8NCE2-3|MTMRE_HUMAN	87.28	5	2	2	60035	Isoform 3 of Myotubularin-related protein 14 OS=Homo sapiens OX=9606 GN=MTMR14
	Q969Q0|RL36L_HUMAN	87.26	16	2	2	12469	60S ribosomal protein L36a-like OS=Homo sapiens OX=9606 GN=RPL36AL PE=1 SV=3
	O75915|PRAF3_HUMAN	87.18	16	2	2	21615	PRA1 family protein 3 OS=Homo sapiens OX=9606 GN=ARL6IP5 PE=1 SV=1
	Q9Y467|SALL2_HUMAN	87.11	2	1	1	105310	Sal-like protein 2 OS=Homo sapiens OX=9606 GN=SALL2 PE=1 SV=4
	Q92552|RT27_HUMAN	87.07	6	2	2	47611	28S ribosomal protein S27 mitochondrial OS=Homo sapiens OX=9606 GN=MRPS27 PE=1 SV=3
	Q6GQQ9-2|OTU7B_HUMAN	86.82	4	3	3	88947	Isoform 2 of OTU domain-containing protein 7B OS=Homo sapiens OX=9606 GN=OTUD7B
	P25208|NFYB_HUMAN	86.74	6	1	1	22831	Nuclear transcription factor Y subunit beta OS=Homo sapiens OX=9606 GN=NFYB PE=1 SV=2
	P33993|MCM7_HUMAN	86.74	3	1	1	81308	DNA replication licensing factor MCM7 OS=Homo sapiens OX=9606 GN=MCM7 PE=1 SV=4
	Q6P6C2|ALKB5_HUMAN	86.68	7	1	1	44256	RNA demethylase ALKBH5 OS=Homo sapiens OX=9606 GN=ALKBH5 PE=1 SV=2
	P53007|TXTP_HUMAN	86.53	7	2	2	34013	Tricarboxylate transport protein mitochondrial OS=Homo sapiens OX=9606 GN=SLC25A1 PE=1 SV=2
	Q7Z309-4|F122B_HUMAN	86.34	5	2	2	27210	Isoform 4 of Protein FAM122B OS=Homo sapiens OX=9606 GN=FAM122B
	Q8TEH3|DEN1A_HUMAN	86.33	3	2	2	110577	DENN domain-containing protein 1A OS=Homo sapiens OX=9606 GN=DENND1A PE=1 SV=2
	P36639-4|8ODP_HUMAN	86.16	16	2	2	17951	Isoform p18 of 7 8-dihydro-8-oxoguanine triphosphatase OS=Homo sapiens OX=9606 GN=NUDT1
	P11802|CDK4_HUMAN	86.15	8	2	1	33730	Cyclin-dependent kinase 4 OS=Homo sapiens OX=9606 GN=CDK4 PE=1 SV=2
	Q29RF7|PDS5A_HUMAN	86.04	2	2	2	150830	Sister chromatid cohesion protein PDS5 homolog A OS=Homo sapiens OX=9606 GN=PDS5A PE=1 SV=1
	Q9UII2|ATIF1_HUMAN	85.95	15	3	3	12249	ATPase inhibitor mitochondrial OS=Homo sapiens OX=9606 GN=ATP5IF1 PE=1 SV=1
	Q8NCG7-2|DGLB_HUMAN	85.79	3	1	1	43191	Isoform 2 of Sn1-specific diacylglycerol lipase beta OS=Homo sapiens OX=9606 GN=DAGLB
	Q9GZZ1|NAA50_HUMAN	85.74	14	2	2	19398	N-alpha-acetyltransferase 50 OS=Homo sapiens OX=9606 GN=NAA50 PE=1 SV=1
	Q14839|CHD4_HUMAN	85.68	2	3	3	218003	Chromodomain-helicase-DNA-binding protein 4 OS=Homo sapiens OX=9606 GN=CHD4 PE=1 SV=2
	Q9ULC4-2|MCTS1_HUMAN	85.64	15	2	2	19229	Isoform 2 of Malignant T-cell-amplified sequence 1 OS=Homo sapiens OX=9606 GN=MCTS1
	Q92973-2|TNPO1_HUMAN	85.39	2	1	1	101310	Isoform 2 of Transportin-1 OS=Homo sapiens OX=9606 GN=TNPO1
	O43347|MSI1H_HUMAN	85.35	7	2	1	39125	RNA-binding protein Musashi homolog 1 OS=Homo sapiens OX=9606 GN=MSI1 PE=1 SV=1
	Q9BZE9|ASPC1_HUMAN	85.17	6	2	2	60183	Tether containing UBX domain for GLUT4 OS=Homo sapiens OX=9606 GN=ASPSCR1 PE=1 SV=1
	P20248|CCNA2_HUMAN	85.1	8	2	2	48551	Cyclin-A2 OS=Homo sapiens OX=9606 GN=CCNA2 PE=1 SV=2
	Q9H9Q2|CSN7B_HUMAN	85.04	10	2	2	29622	COP9 signalosome complex subunit 7b OS=Homo sapiens OX=9606 GN=COPS7B PE=1 SV=1
	Q8N5I9|CL045_HUMAN	84.95	9	1	1	20123	Uncharacterized protein C12orf45 OS=Homo sapiens OX=9606 GN=C12orf45 PE=1 SV=2
	O43488|ARK72_HUMAN	84.92	4	1	1	39589	Aflatoxin B1 aldehyde reductase member 2 OS=Homo sapiens OX=9606 GN=AKR7A2 PE=1 SV=3
	P56181|NDUV3_HUMAN	84.91	15	1	1	11941	NADH dehydrogenase [ubiquinone] flavoprotein 3 mitochondrial OS=Homo sapiens OX=9606 GN=NDUFV3 PE=1 SV=2	78, 95
	Q8N6N3|CA052_HUMAN	84.88	8	1	1	20599	UPF0690 protein C1orf52 OS=Homo sapiens OX=9606 GN=C1orf52 PE=1 SV=1
	P60983|GMFB_HUMAN	84.85	14	2	2	16713	Glia maturation factor beta OS=Homo sapiens OX=9606 GN=GMFB PE=1 SV=2
	Q9UPW0-2|FOXJ3_HUMAN	84.84	3	1	1	65533	Isoform 2 of Forkhead box protein J3 OS=Homo sapiens OX=9606 GN=FOXJ3
	P20226-2|TBP_HUMAN	84.81	8	2	2	35657	Isoform 2 of TATA-box-binding protein OS=Homo sapiens OX=9606 GN=TBP
	Q9GZZ9|UBA5_HUMAN	84.7	8	2	2	44863	Ubiquitin-like modifier-activating enzyme 5 OS=Homo sapiens OX=9606 GN=UBA5 PE=1 SV=1
	P08621-2|RU17_HUMAN	84.55	5	2	2	50618	Isoform 2 of U1 small nuclear ribonucleoprotein 70 kDa OS=Homo sapiens OX=9606 GN=SNRNP70
	Q9NSE4|SYIM_HUMAN	84.55	2	2	2	113791	Isoleucine--tRNA ligase mitochondrial OS=Homo sapiens OX=9606 GN=IARS2 PE=1 SV=2
	Q9H0C8|ILKAP_HUMAN	84.53	10	3	3	42907	Integrin-linked kinase-associated serine/threonine phosphatase 2C OS=Homo sapiens OX=9606 GN=ILKAP PE=1 SV=1
	Q7L014|DDX46_HUMAN	84.52	3	3	3	117362	Probable ATP-dependent RNA helicase DDX46 OS=Homo sapiens OX=9606 GN=DDX46 PE=1 SV=2	894
	P49903-4|SPS1_HUMAN	84.4	8	2	2	35620	Isoform 4 of Selenide water dikinase 1 OS=Homo sapiens OX=9606 GN=SEPHS1
	O96008|TOM40_HUMAN	84.34	11	3	3	37893	Mitochondrial import receptor subunit TOM40 homolog OS=Homo sapiens OX=9606 GN=TOMM40 PE=1 SV=1
	Q15046|SYK_HUMAN	84.34	4	2	2	68048	Lysine--tRNA ligase OS=Homo sapiens OX=9606 GN=KARS1 PE=1 SV=3
	Q9BPY3|F118B_HUMAN	84.29	5	1	1	39499	Protein FAM118B OS=Homo sapiens OX=9606 GN=FAM118B PE=1 SV=1
	P84090|ERH_HUMAN	84.26	17	2	2	12259	Enhancer of rudimentary homolog OS=Homo sapiens OX=9606 GN=ERH PE=1 SV=1
	Q9NQP4|PFD4_HUMAN	84.22	11	1	1	15314	Prefoldin subunit 4 OS=Homo sapiens OX=9606 GN=PFDN4 PE=1 SV=1
	P49840|GSK3A_HUMAN	84.21	7	3	3	50981	Glycogen synthase kinase-3 alpha OS=Homo sapiens OX=9606 GN=GSK3A PE=1 SV=2
	Q15532-2|SSXT_HUMAN	83.94	3	2	2	42216	Isoform 2 of Protein SSXT OS=Homo sapiens OX=9606 GN=SS18
	Q14739|LBR_HUMAN	83.86	5	3	3	70703	Delta(14)-sterol reductase LBR OS=Homo sapiens OX=9606 GN=LBR PE=1 SV=2
	Q9Y5B6|PAXB1_HUMAN	83.82	2	1	1	104804	PAX3- and PAX7-binding protein 1 OS=Homo sapiens OX=9606 GN=PAXBP1 PE=1 SV=2
	Q13907|IDI1_HUMAN	83.78	11	2	2	26319	Isopentenyl-diphosphate Delta-isomerase 1 OS=Homo sapiens OX=9606 GN=IDI1 PE=1 SV=2
	P62244|RS15A_HUMAN	83.63	12	2	2	14840	40S ribosomal protein S15a OS=Homo sapiens OX=9606 GN=RPS15A PE=1 SV=2
	O60563|CCNT1_HUMAN	83.55	5	3	3	80685	Cyclin-T1 OS=Homo sapiens OX=9606 GN=CCNT1 PE=1 SV=1
	Q96EY5-2|MB12A_HUMAN	83.49	6	1	1	24532	Isoform 2 of Multivesicular body subunit 12A OS=Homo sapiens OX=9606 GN=MVB12A
	P36507|MP2K2_HUMAN	83.42	10	3	1	44424	Dual specificity mitogen-activated protein kinase kinase 2 OS=Homo sapiens OX=9606 GN=MAP2K2 PE=1 SV=1
	P22695|QCR2_HUMAN	83.3	4	1	1	48443	Cytochrome b-c1 complex subunit 2 mitochondrial OS=Homo sapiens OX=9606 GN=UQCRC2 PE=1 SV=3
	Q00325-2|MPCP_HUMAN	83.26	6	3	3	39959	Isoform B of Phosphate carrier protein mitochondrial OS=Homo sapiens OX=9606 GN=SLC25A3
	Q99081-4|HTF4_HUMAN	83.23	3	1	1	48157	Isoform 4 of Transcription factor 12 OS=Homo sapiens OX=9606 GN=TCF12
	Q7Z422-2|SZRD1_HUMAN	83.2	31	3	3	14605	Isoform 2 of SUZ domain-containing protein 1 OS=Homo sapiens OX=9606 GN=SZRD1
	Q06546|GABPA_HUMAN	83.18	8	3	3	51295	GA-binding protein alpha chain OS=Homo sapiens OX=9606 GN=GABPA PE=1 SV=1
	O75940|SPF30_HUMAN	83.14	9	2	2	26711	Survival of motor neuron-related-splicing factor 30 OS=Homo sapiens OX=9606 GN=SMNDC1 PE=1 SV=1
	A0A0B4J2D5|GAL3B_HUMAN	83.02	7	2	2	28142	Glutamine amidotransferase-like class 1 domain-containing protein 3B mitochondrial OS=Homo sapiens OX=9606 GN=GATD3B PE=1 SV=1
	P05412|JUN_HUMAN	83.02	5	1	1	35676	Transcription factor AP-1 OS=Homo sapiens OX=9606 GN=JUN PE=1 SV=2
	P98172|EFNB1_HUMAN	83.01	5	1	1	38007	Ephrin-B1 OS=Homo sapiens OX=9606 GN=EFNB1 PE=1 SV=1	289
	Q8TEA8|DTD1_HUMAN	82.99	8	1	1	23424	D-aminoacyl-tRNA deacylase 1 OS=Homo sapiens OX=9606 GN=DTD1 PE=1 SV=2
	Q9H7D7-2|WDR26_HUMAN	82.96	6	3	3	70460	Isoform 2 of WD repeat-containing protein 26 OS=Homo sapiens OX=9606 GN=WDR26
	Q04721|NOTC2_HUMAN	82.88	2	3	3	265403	Neurogenic locus notch homolog protein 2 OS=Homo sapiens OX=9606 GN=NOTCH2 PE=1 SV=3
	Q96AT9-4|RPE_HUMAN	82.88	10	1	1	21739	Isoform 4 of Ribulose-phosphate 3-epimerase OS=Homo sapiens OX=9606 GN=RPE
	P27708|PYR1_HUMAN	82.8	2	2	2	242981	CAD protein OS=Homo sapiens OX=9606 GN=CAD PE=1 SV=3
	Q9H5V9-2|CX056_HUMAN	82.8	8	1	1	19981	Isoform 2 of UPF0428 protein CXorf56 OS=Homo sapiens OX=9606 GN=CXorf56
	Q9UN36-4|NDRG2_HUMAN	82.76	7	1	1	36052	Isoform 4 of Protein NDRG2 OS=Homo sapiens OX=9606 GN=NDRG2
	P41227-2|NAA10_HUMAN	82.7	13	2	2	24784	Isoform 2 of N-alpha-acetyltransferase 10 OS=Homo sapiens OX=9606 GN=NAA10
	Q9C0B5-2|ZDHC5_HUMAN	82.69	2	1	1	71952	Isoform 2 of Palmitoyltransferase ZDHHC5 OS=Homo sapiens OX=9606 GN=ZDHHC5
	P49750|YLPM1_HUMAN	82.53	1	1	1	241643	YLP motif-containing protein 1 OS=Homo sapiens OX=9606 GN=YLPM1 PE=1 SV=4
	P49736|MCM2_HUMAN	82.43	2	2	2	101896	DNA replication licensing factor MCM2 OS=Homo sapiens OX=9606 GN=MCM2 PE=1 SV=4
	Q99541|PLIN2_HUMAN	82.07	8	2	2	48075	Perilipin-2 OS=Homo sapiens OX=9606 GN=PLIN2 PE=1 SV=2
	Q9BTE7|DCNL5_HUMAN	81.75	16	3	3	27508	DCN1-like protein 5 OS=Homo sapiens OX=9606 GN=DCUN1D5 PE=1 SV=1
	P42126-2|ECI1_HUMAN	81.7	5	1	1	30896	Isoform 2 of Enoyl-CoA delta isomerase 1 mitochondrial OS=Homo sapiens OX=9606 GN=ECI1
	Q13257|MD2L1_HUMAN	81.63	12	3	3	23510	Mitotic spindle assembly checkpoint protein MAD2A OS=Homo sapiens OX=9606 GN=MAD2L1 PE=1 SV=1
	Q8N3F8|MILK1_HUMAN	81.56	5	3	3	93441	MICAL-like protein 1 OS=Homo sapiens OX=9606 GN=MICALL1 PE=1 SV=2	595
	P63167|DYL1_HUMAN	81.53	20	2	2	10366	Dynein light chain 1 cytoplasmic OS=Homo sapiens OX=9606 GN=DYNLL1 PE=1 SV=1
	P10412|H14_HUMAN	81.52	11	2	2	21865	Histone H1.4 OS=Homo sapiens OX=9606 GN=H1-4 PE=1 SV=2
	P28070|PSB4_HUMAN	81.5	9	2	2	29204	Proteasome subunit beta type-4 OS=Homo sapiens OX=9606 GN=PSMB4 PE=1 SV=4
	Q53SF7|COBL1_HUMAN	81.36	4	3	3	123868	Cordon-bleu protein-like 1 OS=Homo sapiens OX=9606 GN=COBLL1 PE=1 SV=3
	O15347|HMGB3_HUMAN	81.01	11	2	2	22980	High mobility group protein B3 OS=Homo sapiens OX=9606 GN=HMGB3 PE=1 SV=4
	Q9Y696|CLIC4_HUMAN	80.97	8	2	2	28772	Chloride intracellular channel protein 4 OS=Homo sapiens OX=9606 GN=CLIC4 PE=1 SV=4
	Q9HBM6|TAF9B_HUMAN	80.9	15	2	2	27622	Transcription initiation factor TFIID subunit 9B OS=Homo sapiens OX=9606 GN=TAF9B PE=1 SV=1
	Q15418-4|KS6A1_HUMAN	80.8	2	2	1	81147	Isoform 4 of Ribosomal protein S6 kinase alpha-1 OS=Homo sapiens OX=9606 GN=RPS6KA1
	Q14244-3|MAP7_HUMAN	80.75	5	3	3	72414	Isoform 3 of Ensconsin OS=Homo sapiens OX=9606 GN=MAP7
	Q99598|TSNAX_HUMAN	80.7	7	2	2	33112	Translin-associated protein X OS=Homo sapiens OX=9606 GN=TSNAX PE=1 SV=1
	Q96S82|UBL7_HUMAN	80.61	6	2	2	40510	Ubiquitin-like protein 7 OS=Homo sapiens OX=9606 GN=UBL7 PE=1 SV=2
	Q9UBF2-2|COPG2_HUMAN	80.58	4	2	1	81483	Isoform 2 of Coatomer subunit gamma-2 OS=Homo sapiens OX=9606 GN=COPG2
	Q9Y262-2|EIF3L_HUMAN	80.57	4	2	2	61014	Isoform 2 of Eukaryotic translation initiation factor 3 subunit L OS=Homo sapiens OX=9606 GN=EIF3L
	P52306-6|GDS1_HUMAN	80.42	8	3	3	56536	Isoform 6 of Rap1 GTPase-GDP dissociation stimulator 1 OS=Homo sapiens OX=9606 GN=RAP1GDS1
	Q96RS6-3|NUDC1_HUMAN	80.37	4	2	2	56614	Isoform 3 of NudC domain-containing protein 1 OS=Homo sapiens OX=9606 GN=NUDCD1
	O14561|ACPM_HUMAN	80.36	9	1	1	17417	Acyl carrier protein mitochondrial OS=Homo sapiens OX=9606 GN=NDUFAB1 PE=1 SV=3
	P62995-3|TRA2B_HUMAN	80.36	7	1	1	21935	Isoform 3 of Transformer-2 protein homolog beta OS=Homo sapiens OX=9606 GN=TRA2B
	Q6NZ67|MZT2B_HUMAN	80.24	9	1	1	16226	Mitotic-spindle organizing protein 2B OS=Homo sapiens OX=9606 GN=MZT2B PE=1 SV=1
	P35080|PROF2_HUMAN	80.13	10	1	1	15046	Profilin-2 OS=Homo sapiens OX=9606 GN=PFN2 PE=1 SV=3
	O94906-2|PRP6_HUMAN	80.08	3	2	2	102429	Isoform 2 of Pre-mRNA-processing factor 6 OS=Homo sapiens OX=9606 GN=PRPF6
	P62847-2|RS24_HUMAN	80.08	12	1	1	15069	Isoform 2 of 40S ribosomal protein S24 OS=Homo sapiens OX=9606 GN=RPS24
	Q9NYL9|TMOD3_HUMAN	79.91	9	2	2	39595	Tropomodulin-3 OS=Homo sapiens OX=9606 GN=TMOD3 PE=1 SV=1
	Q7Z3K3-5|POGZ_HUMAN	79.7	1	1	1	145295	Isoform 5 of Pogo transposable element with ZNF domain OS=Homo sapiens OX=9606 GN=POGZ
	Q9H2P0|ADNP_HUMAN	79.65	3	3	3	123563	Activity-dependent neuroprotector homeobox protein OS=Homo sapiens OX=9606 GN=ADNP PE=1 SV=1	367
	Q5ZPR3|CD276_HUMAN	79.64	5	1	1	57236	CD276 antigen OS=Homo sapiens OX=9606 GN=CD276 PE=1 SV=1
	O75390|CISY_HUMAN	79.63	4	2	2	51712	Citrate synthase mitochondrial OS=Homo sapiens OX=9606 GN=CS PE=1 SV=2
	P62308|RUXG_HUMAN	79.63	26	2	2	8496	Small nuclear ribonucleoprotein G OS=Homo sapiens OX=9606 GN=SNRPG PE=1 SV=1
	P46977|STT3A_HUMAN	79.43	4	3	3	80530	Dolichyl-diphosphooligosaccharide--protein glycosyltransferase subunit STT3A OS=Homo sapiens OX=9606 GN=STT3A PE=1 SV=2
	O43747|AP1G1_HUMAN	79.35	3	3	3	91351	AP-1 complex subunit gamma-1 OS=Homo sapiens OX=9606 GN=AP1G1 PE=1 SV=5
	Q96AB3|ISOC2_HUMAN	79.35	24	2	2	22337	Isochorismatase domain-containing protein 2 OS=Homo sapiens OX=9606 GN=ISOC2 PE=1 SV=1
	Q9Y605|MOFA1_HUMAN	79.21	19	1	1	14650	MORF4 family-associated protein 1 OS=Homo sapiens OX=9606 GN=MRFAP1 PE=1 SV=1
	Q99878|H2A1J_HUMAN	79.12	15	1	1	13936	Histone H2A type 1-J OS=Homo sapiens OX=9606 GN=H2AC14 PE=1 SV=3
	P84243|H33_HUMAN	79.07	17	3	3	15328	Histone H3.3 OS=Homo sapiens OX=9606 GN=H3-3A PE=1 SV=2
	Q9Y237|PIN4_HUMAN	79.06	32	2	2	13810	Peptidyl-prolyl cis-trans isomerase NIMA-interacting 4 OS=Homo sapiens OX=9606 GN=PIN4 PE=1 SV=1
	Q9NSI2-2|F207A_HUMAN	79.01	7	1	1	23945	Isoform B of Protein FAM207A OS=Homo sapiens OX=9606 GN=FAM207A
	Q9UBE0|SAE1_HUMAN	78.95	10	2	2	38450	SUMO-activating enzyme subunit 1 OS=Homo sapiens OX=9606 GN=SAE1 PE=1 SV=1
	P46778|RL21_HUMAN	78.93	9	1	1	18565	60S ribosomal protein L21 OS=Homo sapiens OX=9606 GN=RPL21 PE=1 SV=2
	Q66PJ3-4|AR6P4_HUMAN	78.93	4	1	1	42731	Isoform 4 of ADP-ribosylation factor-like protein 6-interacting protein 4 OS=Homo sapiens OX=9606 GN=ARL6IP4
	Q9Y3P9|RBGP1_HUMAN	78.84	2	2	2	121737	Rab GTPase-activating protein 1 OS=Homo sapiens OX=9606 GN=RABGAP1 PE=1 SV=3
	P52788-2|SPSY_HUMAN	78.7	9	2	2	35279	Isoform 2 of Spermine synthase OS=Homo sapiens OX=9606 GN=SMS
	P21333-2|FLNA_HUMAN	78.5	1	3	2	280016	Isoform 2 of Filamin-A OS=Homo sapiens OX=9606 GN=FLNA
	O00203-3|AP3B1_HUMAN	78.42	2	1	1	116195	Isoform 2 of AP-3 complex subunit beta-1 OS=Homo sapiens OX=9606 GN=AP3B1
	Q9NVG8|TBC13_HUMAN	78.4	3	1	1	46554	TBC1 domain family member 13 OS=Homo sapiens OX=9606 GN=TBC1D13 PE=1 SV=3
	Q14019|COTL1_HUMAN	78.38	11	2	2	15945	Coactosin-like protein OS=Homo sapiens OX=9606 GN=COTL1 PE=1 SV=3
	P56134-4|ATPK_HUMAN	78.35	27	1	1	5741	Isoform 4 of ATP synthase subunit f mitochondrial OS=Homo sapiens OX=9606 GN=ATP5MF
	Q9NTX5|ECHD1_HUMAN	78.29	12	2	2	33698	Ethylmalonyl-CoA decarboxylase OS=Homo sapiens OX=9606 GN=ECHDC1 PE=1 SV=2
	Q15125|EBP_HUMAN	78.13	5	1	1	26353	3-beta-hydroxysteroid-Delta(8) Delta(7)-isomerase OS=Homo sapiens OX=9606 GN=EBP PE=1 SV=3
	P48147|PPCE_HUMAN	78.12	2	1	1	80700	Prolyl endopeptidase OS=Homo sapiens OX=9606 GN=PREP PE=1 SV=2
	P62277|RS13_HUMAN	77.93	13	2	2	17222	40S ribosomal protein S13 OS=Homo sapiens OX=9606 GN=RPS13 PE=1 SV=2
	Q9BUT9|MCRI2_HUMAN	77.91	22	2	2	17828	MAPK regulated corepressor interacting protein 2 OS=Homo sapiens OX=9606 GN=MCRIP2 PE=1 SV=2
	O43660-2|PLRG1_HUMAN	77.85	10	4	4	56290	Isoform 2 of Pleiotropic regulator 1 OS=Homo sapiens OX=9606 GN=PLRG1
	P14314-2|GLU2B_HUMAN	77.76	4	2	2	59178	Isoform 2 of Glucosidase 2 subunit beta OS=Homo sapiens OX=9606 GN=PRKCSH
	Q8NDV7-2|TNR6A_HUMAN	77.64	1	1	1	182053	Isoform 2 of Trinucleotide repeat-containing gene 6A protein OS=Homo sapiens OX=9606 GN=TNRC6A
	Q10570|CPSF1_HUMAN	77.48	3	3	3	160883	Cleavage and polyadenylation specificity factor subunit 1 OS=Homo sapiens OX=9606 GN=CPSF1 PE=1 SV=2
	Q9NWQ9|CN119_HUMAN	77.48	14	2	2	16009	Uncharacterized protein C14orf119 OS=Homo sapiens OX=9606 GN=C14orf119 PE=1 SV=1
	Q96SB4-4|SRPK1_HUMAN	77.45	5	2	2	72384	Isoform 3 of SRSF protein kinase 1 OS=Homo sapiens OX=9606 GN=SRPK1
	P28072|PSB6_HUMAN	77.41	8	2	2	25358	Proteasome subunit beta type-6 OS=Homo sapiens OX=9606 GN=PSMB6 PE=1 SV=4
	P05023|AT1A1_HUMAN	77.39	2	2	2	112896	Sodium/potassium-transporting ATPase subunit alpha-1 OS=Homo sapiens OX=9606 GN=ATP1A1 PE=1 SV=1
	Q96AC1-2|FERM2_HUMAN	77.36	5	3	3	72397	Isoform 2 of Fermitin family homolog 2 OS=Homo sapiens OX=9606 GN=FERMT2
	P30419|NMT1_HUMAN	77.34	3	1	1	56806	Glycylpeptide N-tetradecanoyltransferase 1 OS=Homo sapiens OX=9606 GN=NMT1 PE=1 SV=2
	Q8IYL3|CA174_HUMAN	77.23	6	1	1	25977	UPF0688 protein C1orf174 OS=Homo sapiens OX=9606 GN=C1orf174 PE=1 SV=2
	Q9Y2V2|CHSP1_HUMAN	77.17	11	1	1	15892	Calcium-regulated heat-stable protein 1 OS=Homo sapiens OX=9606 GN=CARHSP1 PE=1 SV=2
	Q9P287-3|BCCIP_HUMAN	77.1	11	2	2	33442	Isoform 3 of BRCA2 and CDKN1A-interacting protein OS=Homo sapiens OX=9606 GN=BCCIP
	Q9Y394-2|DHRS7_HUMAN	77.1	7	1	1	32268	Isoform 2 of Dehydrogenase/reductase SDR family member 7 OS=Homo sapiens OX=9606 GN=DHRS7
	P35221|CTNA1_HUMAN	76.98	4	2	2	100071	Catenin alpha-1 OS=Homo sapiens OX=9606 GN=CTNNA1 PE=1 SV=1
	Q12765-3|SCRN1_HUMAN	76.93	6	2	2	38864	Isoform 3 of Secernin-1 OS=Homo sapiens OX=9606 GN=SCRN1
	Q92922|SMRC1_HUMAN	76.89	2	2	2	122867	SWI/SNF complex subunit SMARCC1 OS=Homo sapiens OX=9606 GN=SMARCC1 PE=1 SV=3
	P05091-2|ALDH2_HUMAN	76.87	8	3	2	50989	Isoform 2 of Aldehyde dehydrogenase mitochondrial OS=Homo sapiens OX=9606 GN=ALDH2
	Q7Z7F0|KHDC4_HUMAN	76.87	7	3	3	64845	KH homology domain-containing protein 4 OS=Homo sapiens OX=9606 GN=KHDC4 PE=1 SV=1
	Q969G3-2|SMCE1_HUMAN	76.83	4	1	1	41780	Isoform 2 of SWI/SNF-related matrix-associated actin-dependent regulator of chromatin subfamily E member 1 OS=Homo sapiens OX=9606 GN=SMARCE1
	P53701|CCHL_HUMAN	76.56	6	1	1	30602	Cytochrome c-type heme lyase OS=Homo sapiens OX=9606 GN=HCCS PE=1 SV=1
	O00442|RTCA_HUMAN	76.54	4	1	1	39337	RNA 3'-terminal phosphate cyclase OS=Homo sapiens OX=9606 GN=RTCA PE=1 SV=1
	P78559|MAP1A_HUMAN	76.52	1	1	1	305484	Microtubule-associated protein 1A OS=Homo sapiens OX=9606 GN=MAP1A PE=1 SV=6
	P06493|CDK1_HUMAN	76.45	7	2	1	34095	Cyclin-dependent kinase 1 OS=Homo sapiens OX=9606 GN=CDK1 PE=1 SV=3
	Q96TA1-2|NIBA2_HUMAN	76.41	2	1	1	82683	Isoform 2 of Protein Niban 2 OS=Homo sapiens OX=9606 GN=NIBAN2
	P53004|BIEA_HUMAN	76.37	5	1	1	33428	Biliverdin reductase A OS=Homo sapiens OX=9606 GN=BLVRA PE=1 SV=2
	Q9NT62-2|ATG3_HUMAN	76.34	4	1	1	35467	Isoform 2 of Ubiquitin-like-conjugating enzyme ATG3 OS=Homo sapiens OX=9606 GN=ATG3
	P05198|IF2A_HUMAN	76.3	4	1	1	36112	Eukaryotic translation initiation factor 2 subunit 1 OS=Homo sapiens OX=9606 GN=EIF2S1 PE=1 SV=3
	P19525-2|E2AK2_HUMAN	76.22	4	2	2	57391	Isoform 2 of Interferon-induced double-stranded RNA-activated protein kinase OS=Homo sapiens OX=9606 GN=EIF2AK2
	Q8WU79-2|SMAP2_HUMAN	76.14	6	3	2	43490	Isoform 2 of Stromal membrane-associated protein 2 OS=Homo sapiens OX=9606 GN=SMAP2
	Q9HD33-2|RM47_HUMAN	76.01	5	1	1	27086	Isoform 2 of 39S ribosomal protein L47 mitochondrial OS=Homo sapiens OX=9606 GN=MRPL47
	O75934|SPF27_HUMAN	75.96	6	1	1	26131	Pre-mRNA-splicing factor SPF27 OS=Homo sapiens OX=9606 GN=BCAS2 PE=1 SV=1
	Q9BV20|MTNA_HUMAN	75.94	3	1	1	39150	Methylthioribose-1-phosphate isomerase OS=Homo sapiens OX=9606 GN=MRI1 PE=1 SV=1
	Q9NPD8|UBE2T_HUMAN	75.9	12	2	2	22521	Ubiquitin-conjugating enzyme E2 T OS=Homo sapiens OX=9606 GN=UBE2T PE=1 SV=1
	Q68DQ2|CRBG3_HUMAN	75.81	1	1	1	330632	Very large A-kinase anchor protein OS=Homo sapiens OX=9606 GN=CRYBG3 PE=1 SV=3
	P35659|DEK_HUMAN	75.8	9	3	3	42674	Protein DEK OS=Homo sapiens OX=9606 GN=DEK PE=1 SV=1
	Q6IAA8|LTOR1_HUMAN	75.73	8	1	1	17745	Ragulator complex protein LAMTOR1 OS=Homo sapiens OX=9606 GN=LAMTOR1 PE=1 SV=2	60
	Q96C90|PP14B_HUMAN	75.73	17	1	1	15911	Protein phosphatase 1 regulatory subunit 14B OS=Homo sapiens OX=9606 GN=PPP1R14B PE=1 SV=3
	Q9Y3E5|PTH2_HUMAN	75.64	8	1	1	19194	Peptidyl-tRNA hydrolase 2 mitochondrial OS=Homo sapiens OX=9606 GN=PTRH2 PE=1 SV=1
	Q8N1G2|CMTR1_HUMAN	75.63	3	2	2	95321	Cap-specific mRNA (nucleoside-2'-O-)-methyltransferase 1 OS=Homo sapiens OX=9606 GN=CMTR1 PE=1 SV=1
	P84157-2|MXRA7_HUMAN	75.53	13	2	2	17493	Isoform 2 of Matrix-remodeling-associated protein 7 OS=Homo sapiens OX=9606 GN=MXRA7
	Q5VTR2|BRE1A_HUMAN	75.24	1	1	1	113662	E3 ubiquitin-protein ligase BRE1A OS=Homo sapiens OX=9606 GN=RNF20 PE=1 SV=2
	P22670|RFX1_HUMAN	75.22	3	1	1	104758	MHC class II regulatory factor RFX1 OS=Homo sapiens OX=9606 GN=RFX1 PE=1 SV=2
	P62070-3|RRAS2_HUMAN	75.21	17	2	2	19841	Isoform 3 of Ras-related protein R-Ras2 OS=Homo sapiens OX=9606 GN=RRAS2
	P19419|ELK1_HUMAN	75.08	4	1	1	44888	ETS domain-containing protein Elk-1 OS=Homo sapiens OX=9606 GN=ELK1 PE=1 SV=2
	Q9BY43|CHM4A_HUMAN	75.08	6	1	1	25098	Charged multivesicular body protein 4a OS=Homo sapiens OX=9606 GN=CHMP4A PE=1 SV=3
	Q8WWY3|PRP31_HUMAN	74.95	7	2	2	55456	U4/U6 small nuclear ribonucleoprotein Prp31 OS=Homo sapiens OX=9606 GN=PRPF31 PE=1 SV=2
	Q14687-2|GSE1_HUMAN	74.89	4	2	2	125842	Isoform 2 of Genetic suppressor element 1 OS=Homo sapiens OX=9606 GN=GSE1
	P68036|UB2L3_HUMAN	74.79	12	2	2	17862	Ubiquitin-conjugating enzyme E2 L3 OS=Homo sapiens OX=9606 GN=UBE2L3 PE=1 SV=1
	Q9UJC3-2|HOOK1_HUMAN	74.71	3	1	1	80022	Isoform 2 of Protein Hook homolog 1 OS=Homo sapiens OX=9606 GN=HOOK1
	Q9P013|CWC15_HUMAN	74.7	5	1	1	26624	Spliceosome-associated protein CWC15 homolog OS=Homo sapiens OX=9606 GN=CWC15 PE=1 SV=2
	Q99963-2|SH3G3_HUMAN	74.56	5	1	1	31587	Isoform 2 of Endophilin-A3 OS=Homo sapiens OX=9606 GN=SH3GL3
	Q7Z6Z7-2|HUWE1_HUMAN	74.53	1	2	2	480203	Isoform 2 of E3 ubiquitin-protein ligase HUWE1 OS=Homo sapiens OX=9606 GN=HUWE1
	Q969V6|MRTFA_HUMAN	74.52	4	2	2	98919	Myocardin-related transcription factor A OS=Homo sapiens OX=9606 GN=MRTFA PE=1 SV=1
	P29083|T2EA_HUMAN	74.23	3	1	1	49452	General transcription factor IIE subunit 1 OS=Homo sapiens OX=9606 GN=GTF2E1 PE=1 SV=2
	Q15436|SC23A_HUMAN	74.19	2	1	1	86161	Protein transport protein Sec23A OS=Homo sapiens OX=9606 GN=SEC23A PE=1 SV=2
	Q3ZCW2|LEGL_HUMAN	74.12	17	2	2	18986	Galectin-related protein OS=Homo sapiens OX=9606 GN=LGALSL PE=1 SV=2
	P52815|RM12_HUMAN	74.09	29	3	3	21348	39S ribosomal protein L12 mitochondrial OS=Homo sapiens OX=9606 GN=MRPL12 PE=1 SV=2
	Q12948|FOXC1_HUMAN	74.06	2	1	1	56789	Forkhead box protein C1 OS=Homo sapiens OX=9606 GN=FOXC1 PE=1 SV=3
	Q9NWB1-3|RFOX1_HUMAN	74.03	4	1	1	40005	Isoform 3 of RNA binding protein fox-1 homolog 1 OS=Homo sapiens OX=9606 GN=RBFOX1
	P53582|MAP11_HUMAN	73.96	7	2	2	43215	Methionine aminopeptidase 1 OS=Homo sapiens OX=9606 GN=METAP1 PE=1 SV=2
	Q8NHV4-2|NEDD1_HUMAN	73.86	3	1	1	62379	Isoform 2 of Protein NEDD1 OS=Homo sapiens OX=9606 GN=NEDD1
	Q8N3U4|STAG2_HUMAN	73.68	2	3	3	141326	Cohesin subunit SA-2 OS=Homo sapiens OX=9606 GN=STAG2 PE=1 SV=3
	Q01081-4|U2AF1_HUMAN	73.63	10	2	2	19715	Isoform 4 of Splicing factor U2AF 35 kDa subunit OS=Homo sapiens OX=9606 GN=U2AF1
	Q15393|SF3B3_HUMAN	73.54	1	1	1	135577	Splicing factor 3B subunit 3 OS=Homo sapiens OX=9606 GN=SF3B3 PE=1 SV=4
	Q5TFE4-2|NT5D1_HUMAN	73.5	3	1	1	46027	Isoform 2 of 5'-nucleotidase domain-containing protein 1 OS=Homo sapiens OX=9606 GN=NT5DC1
	Q9HCJ3-2|RAVR2_HUMAN	73.5	3	1	1	72959	Isoform 2 of Ribonucleoprotein PTB-binding 2 OS=Homo sapiens OX=9606 GN=RAVER2
	Q9UI36-2|DACH1_HUMAN	73.49	4	2	2	73030	Isoform 2 of Dachshund homolog 1 OS=Homo sapiens OX=9606 GN=DACH1
	Q9NXH9-2|TRM1_HUMAN	73.46	2	1	1	69306	Isoform 2 of tRNA (guanine(26)-N(2))-dimethyltransferase OS=Homo sapiens OX=9606 GN=TRMT1
	Q96ER3|SAAL1_HUMAN	73.45	5	2	2	53558	Protein SAAL1 OS=Homo sapiens OX=9606 GN=SAAL1 PE=1 SV=2
	Q9H2H9|S38A1_HUMAN	73.16	4	2	2	54048	Sodium-coupled neutral amino acid transporter 1 OS=Homo sapiens OX=9606 GN=SLC38A1 PE=1 SV=1
	Q9UI30-2|TR112_HUMAN	73.12	12	1	1	13576	Isoform 2 of Multifunctional methyltransferase subunit TRM112-like protein OS=Homo sapiens OX=9606 GN=TRMT112
	P60981-2|DEST_HUMAN	73.03	11	2	1	16621	Isoform 2 of Destrin OS=Homo sapiens OX=9606 GN=DSTN
	Q9NX55|HYPK_HUMAN	72.99	20	2	2	14665	Huntingtin-interacting protein K OS=Homo sapiens OX=9606 GN=HYPK PE=1 SV=2
	Q9H334-6|FOXP1_HUMAN	72.86	2	1	1	66417	Isoform 6 of Forkhead box protein P1 OS=Homo sapiens OX=9606 GN=FOXP1
	Q96E09|F122A_HUMAN	72.58	7	2	2	30529	Protein FAM122A OS=Homo sapiens OX=9606 GN=FAM122A PE=1 SV=1
	Q8IUD2|RB6I2_HUMAN	72.41	3	2	2	128086	ELKS/Rab6-interacting/CAST family member 1 OS=Homo sapiens OX=9606 GN=ERC1 PE=1 SV=1
	Q9BW91-2|NUDT9_HUMAN	72.39	9	2	2	33776	Isoform 2 of ADP-ribose pyrophosphatase mitochondrial OS=Homo sapiens OX=9606 GN=NUDT9
	P51531-2|SMCA2_HUMAN	72.34	2	2	2	179280	Isoform Short of Probable global transcription activator SNF2L2 OS=Homo sapiens OX=9606 GN=SMARCA2
	P01111|RASN_HUMAN	72.32	17	3	2	21229	GTPase NRas OS=Homo sapiens OX=9606 GN=NRAS PE=1 SV=1
	Q9Y5L0-3|TNPO3_HUMAN	72.3	2	1	1	102541	Isoform 3 of Transportin-3 OS=Homo sapiens OX=9606 GN=TNPO3
	Q96AG4|LRC59_HUMAN	72.13	3	1	1	34930	Leucine-rich repeat-containing protein 59 OS=Homo sapiens OX=9606 GN=LRRC59 PE=1 SV=1
	O15047|SET1A_HUMAN	72.07	1	1	1	186033	Histone-lysine N-methyltransferase SETD1A OS=Homo sapiens OX=9606 GN=SETD1A PE=1 SV=3
	Q9BQ52|RNZ2_HUMAN	72.07	2	1	1	92219	Zinc phosphodiesterase ELAC protein 2 OS=Homo sapiens OX=9606 GN=ELAC2 PE=1 SV=2
	Q13451|FKBP5_HUMAN	72.01	7	2	2	51212	Peptidyl-prolyl cis-trans isomerase FKBP5 OS=Homo sapiens OX=9606 GN=FKBP5 PE=1 SV=2
	Q96K76-4|UBP47_HUMAN	71.92	2	2	2	154697	Isoform 4 of Ubiquitin carboxyl-terminal hydrolase 47 OS=Homo sapiens OX=9606 GN=USP47
	Q9UNP9-2|PPIE_HUMAN	71.88	6	3	2	33085	Isoform B of Peptidyl-prolyl cis-trans isomerase E OS=Homo sapiens OX=9606 GN=PPIE
	Q9HCM7|FBSL_HUMAN	71.79	1	1	1	110907	Fibrosin-1-like protein OS=Homo sapiens OX=9606 GN=FBRSL1 PE=1 SV=4
	O75928-3|PIAS2_HUMAN	71.68	4	1	1	45057	Isoform 3 of E3 SUMO-protein ligase PIAS2 OS=Homo sapiens OX=9606 GN=PIAS2
	P52888|THOP1_HUMAN	71.66	2	1	1	78840	Thimet oligopeptidase OS=Homo sapiens OX=9606 GN=THOP1 PE=1 SV=2
	P78337|PITX1_HUMAN	71.59	10	2	2	34128	Pituitary homeobox 1 OS=Homo sapiens OX=9606 GN=PITX1 PE=1 SV=2
	Q16799|RTN1_HUMAN	71.57	4	3	3	83618	Reticulon-1 OS=Homo sapiens OX=9606 GN=RTN1 PE=1 SV=1
	P55212-2|CASP6_HUMAN	71.55	9	2	2	22574	Isoform Beta of Caspase-6 OS=Homo sapiens OX=9606 GN=CASP6
	Q9NZ63|TLS1_HUMAN	71.54	6	2	2	33688	Telomere length and silencing protein 1 homolog OS=Homo sapiens OX=9606 GN=C9orf78 PE=1 SV=1
	O15145|ARPC3_HUMAN	71.51	7	1	1	20547	Actin-related protein 2/3 complex subunit 3 OS=Homo sapiens OX=9606 GN=ARPC3 PE=1 SV=3
	Q9C0B0|UNK_HUMAN	71.5	1	1	1	88084	RING finger protein unkempt homolog OS=Homo sapiens OX=9606 GN=UNK PE=1 SV=2
	Q9Y606-2|TRUA_HUMAN	71.5	5	2	2	44377	Isoform 2 of tRNA pseudouridine synthase A OS=Homo sapiens OX=9606 GN=PUS1
	P69905|HBA_HUMAN	71.4	11	1	1	15258	Hemoglobin subunit alpha OS=Homo sapiens OX=9606 GN=HBA1 PE=1 SV=2
	Q86VR2|RETR3_HUMAN	71.31	3	1	1	51396	Reticulophagy regulator 3 OS=Homo sapiens OX=9606 GN=RETREG3 PE=1 SV=1
	O60502|OGA_HUMAN	71.25	3	2	2	102915	Protein O-GlcNAcase OS=Homo sapiens OX=9606 GN=OGA PE=1 SV=2
	Q8N128|F177A_HUMAN	71.17	11	2	2	23757	Protein FAM177A1 OS=Homo sapiens OX=9606 GN=FAM177A1 PE=1 SV=1
	Q7Z3D4|LYSM3_HUMAN	71.09	5	1	1	34538	LysM and putative peptidoglycan-binding domain-containing protein 3 OS=Homo sapiens OX=9606 GN=LYSMD3 PE=1 SV=2
	P61962|DCAF7_HUMAN	71.04	4	1	1	38926	DDB1- and CUL4-associated factor 7 OS=Homo sapiens OX=9606 GN=DCAF7 PE=1 SV=1
	Q92934|BAD_HUMAN	71.01	10	1	1	18392	Bcl2-associated agonist of cell death OS=Homo sapiens OX=9606 GN=BAD PE=1 SV=3
	Q9BVW5|TIPIN_HUMAN	70.99	4	1	1	34555	TIMELESS-interacting protein OS=Homo sapiens OX=9606 GN=TIPIN PE=1 SV=2
	P55957|BID_HUMAN	70.91	7	1	1	21995	BH3-interacting domain death agonist OS=Homo sapiens OX=9606 GN=BID PE=1 SV=1
	Q96PC5-5|MIA2_HUMAN	70.86	2	1	1	83373	Isoform 4 of Melanoma inhibitory activity protein 2 OS=Homo sapiens OX=9606 GN=MIA2
	Q7L5D6|GET4_HUMAN	70.78	5	1	1	36504	Golgi to ER traffic protein 4 homolog OS=Homo sapiens OX=9606 GN=GET4 PE=1 SV=1
	Q8IXH7-4|NELFD_HUMAN	70.74	2	1	1	65479	Isoform NELF-D of Negative elongation factor C/D OS=Homo sapiens OX=9606 GN=NELFCD
	Q9UPY6|WASF3_HUMAN	70.63	2	1	1	55293	Wiskott-Aldrich syndrome protein family member 3 OS=Homo sapiens OX=9606 GN=WASF3 PE=1 SV=2
	Q9UER7-3|DAXX_HUMAN	70.56	3	1	1	73589	Isoform 3 of Death domain-associated protein 6 OS=Homo sapiens OX=9606 GN=DAXX
	Q9NRP0|OSTC_HUMAN	70.51	8	1	1	16829	Oligosaccharyltransferase complex subunit OSTC OS=Homo sapiens OX=9606 GN=OSTC PE=1 SV=1
	Q9Y5S9-2|RBM8A_HUMAN	70.34	11	1	1	19760	Isoform 2 of RNA-binding protein 8A OS=Homo sapiens OX=9606 GN=RBM8A
	P20674|COX5A_HUMAN	70.22	11	2	2	16762	Cytochrome c oxidase subunit 5A mitochondrial OS=Homo sapiens OX=9606 GN=COX5A PE=1 SV=2
	Q6UUV7-3|CRTC3_HUMAN	70.19	3	1	1	66830	Isoform 3 of CREB-regulated transcription coactivator 3 OS=Homo sapiens OX=9606 GN=CRTC3
	P11413|G6PD_HUMAN	70.16	3	2	2	59257	Glucose-6-phosphate 1-dehydrogenase OS=Homo sapiens OX=9606 GN=G6PD PE=1 SV=4
	Q15506|SP17_HUMAN	70.14	16	2	2	17406	Sperm surface protein Sp17 OS=Homo sapiens OX=9606 GN=SPA17 PE=1 SV=1
	P51648|AL3A2_HUMAN	70.03	4	1	1	54848	Aldehyde dehydrogenase family 3 member A2 OS=Homo sapiens OX=9606 GN=ALDH3A2 PE=1 SV=1
	O94903|PLPHP_HUMAN	70.02	11	2	2	30344	Pyridoxal phosphate homeostasis protein OS=Homo sapiens OX=9606 GN=PLPBP PE=1 SV=1
	Q9H098|F107B_HUMAN	69.9	10	1	1	15558	Protein FAM107B OS=Homo sapiens OX=9606 GN=FAM107B PE=1 SV=1
	Q6PD74|AAGAB_HUMAN	69.87	4	1	1	34594	Alpha- and gamma-adaptin-binding protein p34 OS=Homo sapiens OX=9606 GN=AAGAB PE=1 SV=1
	Q9NQZ5|STAR7_HUMAN	69.87	3	1	1	43113	StAR-related lipid transfer protein 7 mitochondrial OS=Homo sapiens OX=9606 GN=STARD7 PE=1 SV=2
	P62714|PP2AB_HUMAN	69.81	4	1	1	35575	Serine/threonine-protein phosphatase 2A catalytic subunit beta isoform OS=Homo sapiens OX=9606 GN=PPP2CB PE=1 SV=1
	Q9H3U1-2|UN45A_HUMAN	69.8	4	3	3	101675	Isoform 2 of Protein unc-45 homolog A OS=Homo sapiens OX=9606 GN=UNC45A
	O95197-7|RTN3_HUMAN	69.72	2	2	2	100824	Isoform 7 of Reticulon-3 OS=Homo sapiens OX=9606 GN=RTN3
	O43447|PPIH_HUMAN	69.69	14	2	2	19208	Peptidyl-prolyl cis-trans isomerase H OS=Homo sapiens OX=9606 GN=PPIH PE=1 SV=1
	Q15102|PA1B3_HUMAN	69.51	7	2	2	25734	Platelet-activating factor acetylhydrolase IB subunit gamma OS=Homo sapiens OX=9606 GN=PAFAH1B3 PE=1 SV=1
	Q13501-2|SQSTM_HUMAN	69.45	7	2	2	38629	Isoform 2 of Sequestosome-1 OS=Homo sapiens OX=9606 GN=SQSTM1
	A0AVT1|UBA6_HUMAN	69.31	2	2	2	117970	Ubiquitin-like modifier-activating enzyme 6 OS=Homo sapiens OX=9606 GN=UBA6 PE=1 SV=1
	P55084-2|ECHB_HUMAN	69.28	4	2	2	48880	Isoform 2 of Trifunctional enzyme subunit beta mitochondrial OS=Homo sapiens OX=9606 GN=HADHB
	Q15020|SART3_HUMAN	69.26	2	2	2	109935	Squamous cell carcinoma antigen recognized by T-cells 3 OS=Homo sapiens OX=9606 GN=SART3 PE=1 SV=1
	P52732|KIF11_HUMAN	69.25	3	2	2	119159	Kinesin-like protein KIF11 OS=Homo sapiens OX=9606 GN=KIF11 PE=1 SV=2
	Q9BQ69|MACD1_HUMAN	69.18	10	2	2	35505	ADP-ribose glycohydrolase MACROD1 OS=Homo sapiens OX=9606 GN=MACROD1 PE=1 SV=2
	Q13867|BLMH_HUMAN	69.11	2	1	1	52562	Bleomycin hydrolase OS=Homo sapiens OX=9606 GN=BLMH PE=1 SV=1
	P62333|PRS10_HUMAN	69.07	7	2	2	44173	26S proteasome regulatory subunit 10B OS=Homo sapiens OX=9606 GN=PSMC6 PE=1 SV=1
	Q5SYE7-2|NHSL1_HUMAN	68.99	1	1	1	170476	Isoform 2 of NHS-like protein 1 OS=Homo sapiens OX=9606 GN=NHSL1
	Q00403|TF2B_HUMAN	68.87	7	2	2	34833	Transcription initiation factor IIB OS=Homo sapiens OX=9606 GN=GTF2B PE=1 SV=1
	Q9HCN4-3|GPN1_HUMAN	68.82	4	1	1	31832	Isoform 3 of GPN-loop GTPase 1 OS=Homo sapiens OX=9606 GN=GPN1
	Q8WUH6|TM263_HUMAN	68.74	14	1	1	11748	Transmembrane protein 263 OS=Homo sapiens OX=9606 GN=TMEM263 PE=1 SV=1
	Q8TCT9-5|HM13_HUMAN	68.57	4	1	1	36814	Isoform 5 of Minor histocompatibility antigen H13 OS=Homo sapiens OX=9606 GN=HM13
	Q92968|PEX13_HUMAN	68.57	2	1	1	44130	Peroxisomal membrane protein PEX13 OS=Homo sapiens OX=9606 GN=PEX13 PE=1 SV=2
	Q8TCG1-2|CIP2A_HUMAN	68.54	2	1	1	84579	Isoform 2 of Protein CIP2A OS=Homo sapiens OX=9606 GN=CIP2A
	P14927|QCR7_HUMAN	68.49	12	1	1	13530	Cytochrome b-c1 complex subunit 7 OS=Homo sapiens OX=9606 GN=UQCRB PE=1 SV=2
	Q66K14-2|TBC9B_HUMAN	68.47	1	1	1	138670	Isoform 2 of TBC1 domain family member 9B OS=Homo sapiens OX=9606 GN=TBC1D9B
	Q9Y4L1-2|HYOU1_HUMAN	68.41	6	2	2	62757	Isoform 2 of Hypoxia up-regulated protein 1 OS=Homo sapiens OX=9606 GN=HYOU1
	Q6NVV1|R13P3_HUMAN	68.38	11	1	1	12135	Putative 60S ribosomal protein L13a protein RPL13AP3 OS=Homo sapiens OX=9606 GN=RPL13AP3 PE=5 SV=1
	Q3KQU3-2|MA7D1_HUMAN	68.35	3	3	3	88726	Isoform 2 of MAP7 domain-containing protein 1 OS=Homo sapiens OX=9606 GN=MAP7D1
	P19838-3|NFKB1_HUMAN	68.31	2	1	1	85520	Isoform 3 of Nuclear factor NF-kappa-B p105 subunit OS=Homo sapiens OX=9606 GN=NFKB1
	P21281|VATB2_HUMAN	68.21	3	1	1	56501	V-type proton ATPase subunit B brain isoform OS=Homo sapiens OX=9606 GN=ATP6V1B2 PE=1 SV=3
	O95210|STBD1_HUMAN	68.18	4	1	1	39007	Starch-binding domain-containing protein 1 OS=Homo sapiens OX=9606 GN=STBD1 PE=1 SV=1
	Q6L8Q7-2|PDE12_HUMAN	68.12	2	1	1	58890	Isoform 2 of 2' 5'-phosphodiesterase 12 OS=Homo sapiens OX=9606 GN=PDE12	202
	Q9UMY4|SNX12_HUMAN	68.1	11	2	2	18885	Sorting nexin-12 OS=Homo sapiens OX=9606 GN=SNX12 PE=1 SV=4
	O60888-3|CUTA_HUMAN	68.08	9	1	1	16833	Isoform C of Protein CutA OS=Homo sapiens OX=9606 GN=CUTA
	P63165|SUMO1_HUMAN	68.04	19	2	2	11557	Small ubiquitin-related modifier 1 OS=Homo sapiens OX=9606 GN=SUMO1 PE=1 SV=1
	P30049|ATPD_HUMAN	68.02	8	1	1	17490	ATP synthase subunit delta mitochondrial OS=Homo sapiens OX=9606 GN=ATP5F1D PE=1 SV=2
	P36969-2|GPX4_HUMAN	67.96	6	1	1	19525	Isoform Cytoplasmic of Phospholipid hydroperoxide glutathione peroxidase OS=Homo sapiens OX=9606 GN=GPX4
	Q8NHP8|PLBL2_HUMAN	67.75	3	1	1	65472	Putative phospholipase B-like 2 OS=Homo sapiens OX=9606 GN=PLBD2 PE=1 SV=2
	Q9NQ48-3|LZTL1_HUMAN	67.72	6	1	1	29332	Isoform 3 of Leucine zipper transcription factor-like protein 1 OS=Homo sapiens OX=9606 GN=LZTFL1
	Q9H936|GHC1_HUMAN	67.7	3	1	1	34470	Mitochondrial glutamate carrier 1 OS=Homo sapiens OX=9606 GN=SLC25A22 PE=1 SV=1
	Q01085|TIAR_HUMAN	67.56	3	1	1	41591	Nucleolysin TIAR OS=Homo sapiens OX=9606 GN=TIAL1 PE=1 SV=1
	Q9UHC7-4|MKRN1_HUMAN	67.56	5	1	1	35224	Isoform 4 of E3 ubiquitin-protein ligase makorin-1 OS=Homo sapiens OX=9606 GN=MKRN1
	P02771|FETA_HUMAN	67.47	3	2	2	68678	Alpha-fetoprotein OS=Homo sapiens OX=9606 GN=AFP PE=1 SV=1
	Q9NTK5-3|OLA1_HUMAN	67.47	9	3	3	31440	Isoform 3 of Obg-like ATPase 1 OS=Homo sapiens OX=9606 GN=OLA1
	Q8WTV0|SCRB1_HUMAN	67.38	2	1	1	60878	Scavenger receptor class B member 1 OS=Homo sapiens OX=9606 GN=SCARB1 PE=1 SV=1	500
	P00739|HPTR_HUMAN	67.25	3	1	1	39030	Haptoglobin-related protein OS=Homo sapiens OX=9606 GN=HPR PE=2 SV=2
	Q6P1L5-2|F117B_HUMAN	67.12	6	1	1	29428	Isoform 2 of Protein FAM117B OS=Homo sapiens OX=9606 GN=FAM117B
	A6NJ46|NKX63_HUMAN	67.11	5	1	1	28948	Homeobox protein Nkx-6.3 OS=Homo sapiens OX=9606 GN=NKX6-3 PE=2 SV=1
	Q96EA4-3|SPDLY_HUMAN	67.05	6	2	2	61015	Isoform 3 of Protein Spindly OS=Homo sapiens OX=9606 GN=SPDL1
	Q14168-6|MPP2_HUMAN	66.99	2	1	1	60512	Isoform 6 of MAGUK p55 subfamily member 2 OS=Homo sapiens OX=9606 GN=MPP2
	Q8IZD4-2|DCP1B_HUMAN	66.99	2	1	1	56273	Isoform 2 of mRNA-decapping enzyme 1B OS=Homo sapiens OX=9606 GN=DCP1B
	Q13952-6|NFYC_HUMAN	66.95	4	1	1	33702	Isoform 6 of Nuclear transcription factor Y subunit gamma OS=Homo sapiens OX=9606 GN=NFYC
	Q9UL46|PSME2_HUMAN	66.92	10	2	2	27402	Proteasome activator complex subunit 2 OS=Homo sapiens OX=9606 GN=PSME2 PE=1 SV=4
	Q6P587|FAHD1_HUMAN	66.87	7	1	1	24843	Acylpyruvase FAHD1 mitochondrial OS=Homo sapiens OX=9606 GN=FAHD1 PE=1 SV=2
	Q6UUV9-3|CRTC1_HUMAN	66.85	2	1	1	62530	Isoform 3 of CREB-regulated transcription coactivator 1 OS=Homo sapiens OX=9606 GN=CRTC1
	Q05397-6|FAK1_HUMAN	66.74	6	2	2	39874	Isoform 6 of Focal adhesion kinase 1 OS=Homo sapiens OX=9606 GN=PTK2
	Q96JY6-4|PDLI2_HUMAN	66.72	4	1	1	29105	Isoform 4 of PDZ and LIM domain protein 2 OS=Homo sapiens OX=9606 GN=PDLIM2
	Q96T76-5|MMS19_HUMAN	66.66	1	1	1	102639	Isoform 4 of MMS19 nucleotide excision repair protein homolog OS=Homo sapiens OX=9606 GN=MMS19
	Q9H0D6-2|XRN2_HUMAN	66.63	3	2	2	99962	Isoform 2 of 5'-3' exoribonuclease 2 OS=Homo sapiens OX=9606 GN=XRN2
	Q14CB8-6|RHG19_HUMAN	66.62	3	1	1	52466	Isoform 6 of Rho GTPase-activating protein 19 OS=Homo sapiens OX=9606 GN=ARHGAP19
	Q8N6M0-2|OTU6B_HUMAN	66.59	7	1	1	21809	Isoform 2 of Deubiquitinase OTUD6B OS=Homo sapiens OX=9606 GN=OTUD6B
	Q68EM7-2|RHG17_HUMAN	66.58	1	1	1	87609	Isoform 2 of Rho GTPase-activating protein 17 OS=Homo sapiens OX=9606 GN=ARHGAP17
	Q9Y3D2|MSRB2_HUMAN	66.58	5	1	1	19536	Methionine-R-sulfoxide reductase B2 mitochondrial OS=Homo sapiens OX=9606 GN=MSRB2 PE=1 SV=2
	Q92620|PRP16_HUMAN	66.46	1	1	1	140502	Pre-mRNA-splicing factor ATP-dependent RNA helicase PRP16 OS=Homo sapiens OX=9606 GN=DHX38 PE=1 SV=2
	Q9UBQ7|GRHPR_HUMAN	66.39	15	3	3	35668	Glyoxylate reductase/hydroxypyruvate reductase OS=Homo sapiens OX=9606 GN=GRHPR PE=1 SV=1
	Q92616|GCN1_HUMAN	66.33	2	3	3	292756	eIF-2-alpha kinase activator GCN1 OS=Homo sapiens OX=9606 GN=GCN1 PE=1 SV=6
	O00443|P3C2A_HUMAN	66.09	1	1	1	190678	Phosphatidylinositol 4-phosphate 3-kinase C2 domain-containing subunit alpha OS=Homo sapiens OX=9606 GN=PIK3C2A PE=1 SV=2
	Q8NBF2|NHLC2_HUMAN	66.02	3	2	2	79444	NHL repeat-containing protein 2 OS=Homo sapiens OX=9606 GN=NHLRC2 PE=1 SV=1
	Q9NRF2-2|SH2B1_HUMAN	65.96	2	1	1	70781	Isoform 2 of SH2B adapter protein 1 OS=Homo sapiens OX=9606 GN=SH2B1
	Q8IW35|CEP97_HUMAN	65.93	3	2	2	96981	Centrosomal protein of 97 kDa OS=Homo sapiens OX=9606 GN=CEP97 PE=1 SV=1
	P57088|TMM33_HUMAN	65.9	5	1	1	27978	Transmembrane protein 33 OS=Homo sapiens OX=9606 GN=TMEM33 PE=1 SV=2
	P51809-2|VAMP7_HUMAN	65.85	3	1	1	30217	Isoform 2 of Vesicle-associated membrane protein 7 OS=Homo sapiens OX=9606 GN=VAMP7
	Q9NV56|MRGBP_HUMAN	65.85	6	1	1	22417	MRG/MORF4L-binding protein OS=Homo sapiens OX=9606 GN=MRGBP PE=1 SV=1
	P20962|PTMS_HUMAN	65.83	12	1	1	11530	Parathymosin OS=Homo sapiens OX=9606 GN=PTMS PE=1 SV=2
	P56749|CLD12_HUMAN	65.76	6	1	1	27110	Claudin-12 OS=Homo sapiens OX=9606 GN=CLDN12 PE=1 SV=1
	Q08752|PPID_HUMAN	65.72	5	2	2	40764	Peptidyl-prolyl cis-trans isomerase D OS=Homo sapiens OX=9606 GN=PPID PE=1 SV=3
	Q9UIA9|XPO7_HUMAN	65.71	3	3	3	123907	Exportin-7 OS=Homo sapiens OX=9606 GN=XPO7 PE=1 SV=3
	P52434|RPAB3_HUMAN	65.62	9	1	1	17143	DNA-directed RNA polymerases I II and III subunit RPABC3 OS=Homo sapiens OX=9606 GN=POLR2H PE=1 SV=4
	Q9H9C1-2|SPE39_HUMAN	65.49	3	1	1	51581	Isoform 2 of Spermatogenesis-defective protein 39 homolog OS=Homo sapiens OX=9606 GN=VIPAS39	16
	Q8N806|UBR7_HUMAN	65.49	4	2	2	47999	Putative E3 ubiquitin-protein ligase UBR7 OS=Homo sapiens OX=9606 GN=UBR7 PE=1 SV=2
	Q00059|TFAM_HUMAN	65.48	4	1	1	29097	Transcription factor A mitochondrial OS=Homo sapiens OX=9606 GN=TFAM PE=1 SV=1
	Q7L099-2|RUFY3_HUMAN	65.39	2	1	1	55875	Isoform 2 of Protein RUFY3 OS=Homo sapiens OX=9606 GN=RUFY3
	Q07866-8|KLC1_HUMAN	65.38	5	2	1	62826	Isoform S of Kinesin light chain 1 OS=Homo sapiens OX=9606 GN=KLC1
	Q92882|OSTF1_HUMAN	65.38	6	1	1	23787	Osteoclast-stimulating factor 1 OS=Homo sapiens OX=9606 GN=OSTF1 PE=1 SV=2
	Q9BQB6-3|VKOR1_HUMAN	65.36	14	1	1	9875	Isoform 3 of Vitamin K epoxide reductase complex subunit 1 OS=Homo sapiens OX=9606 GN=VKORC1
	P11279-2|LAMP1_HUMAN	65.33	3	1	1	38986	Isoform 2 of Lysosome-associated membrane glycoprotein 1 OS=Homo sapiens OX=9606 GN=LAMP1
	Q9BXJ9|NAA15_HUMAN	65.25	2	2	2	101272	N-alpha-acetyltransferase 15 NatA auxiliary subunit OS=Homo sapiens OX=9606 GN=NAA15 PE=1 SV=1
	P35606-2|COPB2_HUMAN	65.23	3	2	2	99046	Isoform 2 of Coatomer subunit beta' OS=Homo sapiens OX=9606 GN=COPB2	827
	P29372-5|3MG_HUMAN	65.18	5	1	1	30824	Isoform 4 of DNA-3-methyladenine glycosylase OS=Homo sapiens OX=9606 GN=MPG
	P51532-2|SMCA4_HUMAN	65.16	1	1	1	181347	Isoform 2 of Transcription activator BRG1 OS=Homo sapiens OX=9606 GN=SMARCA4
	P62330|ARF6_HUMAN	65.16	13	2	2	20082	ADP-ribosylation factor 6 OS=Homo sapiens OX=9606 GN=ARF6 PE=1 SV=2
	Q99538-3|LGMN_HUMAN	65.16	5	1	1	42008	Isoform 3 of Legumain OS=Homo sapiens OX=9606 GN=LGMN
	Q8TBC4-2|UBA3_HUMAN	65.06	3	1	1	50072	Isoform 2 of NEDD8-activating enzyme E1 catalytic subunit OS=Homo sapiens OX=9606 GN=UBA3
	O75431-2|MTX2_HUMAN	65.04	8	2	2	28823	Isoform 2 of Metaxin-2 OS=Homo sapiens OX=9606 GN=MTX2
	Q13613-2|MTMR1_HUMAN	65.02	3	1	1	63330	Isoform 1A of Myotubularin-related protein 1 OS=Homo sapiens OX=9606 GN=MTMR1
	P08133-2|ANXA6_HUMAN	64.99	4	1	1	72424	Isoform 2 of Annexin A6 OS=Homo sapiens OX=9606 GN=ANXA6
	Q07065|CKAP4_HUMAN	64.99	3	2	2	66023	Cytoskeleton-associated protein 4 OS=Homo sapiens OX=9606 GN=CKAP4 PE=1 SV=2
	O94763-2|RMP_HUMAN	64.92	5	2	2	51247	Isoform 2 of Unconventional prefoldin RPB5 interactor 1 OS=Homo sapiens OX=9606 GN=URI1
	O75475|PSIP1_HUMAN	64.82	3	2	1	60103	PC4 and SFRS1-interacting protein OS=Homo sapiens OX=9606 GN=PSIP1 PE=1 SV=1
	Q12792|TWF1_HUMAN	64.81	4	1	1	40283	Twinfilin-1 OS=Homo sapiens OX=9606 GN=TWF1 PE=1 SV=3
	O75436-2|VP26A_HUMAN	64.78	7	1	1	28938	Isoform 2 of Vacuolar protein sorting-associated protein 26A OS=Homo sapiens OX=9606 GN=VPS26A
	Q9NVM6|DJC17_HUMAN	64.77	5	1	1	34687	DnaJ homolog subfamily C member 17 OS=Homo sapiens OX=9606 GN=DNAJC17 PE=1 SV=1
	P29218|IMPA1_HUMAN	64.73	4	1	1	30189	Inositol monophosphatase 1 OS=Homo sapiens OX=9606 GN=IMPA1 PE=1 SV=1
	Q7Z6E9-2|RBBP6_HUMAN	64.71	1	1	1	197286	Isoform 2 of E3 ubiquitin-protein ligase RBBP6 OS=Homo sapiens OX=9606 GN=RBBP6
	Q5BKZ1|ZN326_HUMAN	64.7	3	1	1	65654	DBIRD complex subunit ZNF326 OS=Homo sapiens OX=9606 GN=ZNF326 PE=1 SV=2
	P30043|BLVRB_HUMAN	64.67	7	1	1	22119	Flavin reductase (NADPH) OS=Homo sapiens OX=9606 GN=BLVRB PE=1 SV=3
	Q9UBQ0|VPS29_HUMAN	64.67	16	3	3	20506	Vacuolar protein sorting-associated protein 29 OS=Homo sapiens OX=9606 GN=VPS29 PE=1 SV=1
	P43034|LIS1_HUMAN	64.61	5	2	1	46638	Platelet-activating factor acetylhydrolase IB subunit alpha OS=Homo sapiens OX=9606 GN=PAFAH1B1 PE=1 SV=2
	O43264-2|ZW10_HUMAN	64.55	2	1	1	76807	Isoform 2 of Centromere/kinetochore protein zw10 homolog OS=Homo sapiens OX=9606 GN=ZW10
	P51965-2|UB2E1_HUMAN	64.55	7	1	1	18000	Isoform 2 of Ubiquitin-conjugating enzyme E2 E1 OS=Homo sapiens OX=9606 GN=UBE2E1
	P50579|MAP2_HUMAN	64.54	5	1	1	52892	Methionine aminopeptidase 2 OS=Homo sapiens OX=9606 GN=METAP2 PE=1 SV=1	79
	O95835|LATS1_HUMAN	64.39	1	1	1	126870	Serine/threonine-protein kinase LATS1 OS=Homo sapiens OX=9606 GN=LATS1 PE=1 SV=1
	P49418-2|AMPH_HUMAN	64.38	5	2	2	71929	Isoform 2 of Amphiphysin OS=Homo sapiens OX=9606 GN=AMPH
	Q14258|TRI25_HUMAN	64.38	2	1	1	70974	E3 ubiquitin/ISG15 ligase TRIM25 OS=Homo sapiens OX=9606 GN=TRIM25 PE=1 SV=2
	Q6P1Q9-2|MET2B_HUMAN	64.34	4	1	1	36057	Isoform 2 of tRNA N(3)-methylcytidine methyltransferase METTL2B OS=Homo sapiens OX=9606 GN=METTL2B
	Q12972|PP1R8_HUMAN	64.26	4	1	1	38479	Nuclear inhibitor of protein phosphatase 1 OS=Homo sapiens OX=9606 GN=PPP1R8 PE=1 SV=2
	O75439|MPPB_HUMAN	64.17	3	2	1	54366	Mitochondrial-processing peptidase subunit beta OS=Homo sapiens OX=9606 GN=PMPCB PE=1 SV=2
	P60033|CD81_HUMAN	64.17	7	1	1	25809	CD81 antigen OS=Homo sapiens OX=9606 GN=CD81 PE=1 SV=1
	Q14980-2|NUMA1_HUMAN	64.06	1	1	1	236513	Isoform 2 of Nuclear mitotic apparatus protein 1 OS=Homo sapiens OX=9606 GN=NUMA1
	Q9HDC9-2|APMAP_HUMAN	64.06	4	1	1	32161	Isoform 2 of Adipocyte plasma membrane-associated protein OS=Homo sapiens OX=9606 GN=APMAP
	Q9NRG1-2|PRDC1_HUMAN	63.97	11	2	1	21558	Isoform 2 of Phosphoribosyltransferase domain-containing protein 1 OS=Homo sapiens OX=9606 GN=PRTFDC1
	Q8IYB8|SUV3_HUMAN	63.86	2	1	1	87991	ATP-dependent RNA helicase SUPV3L1 mitochondrial OS=Homo sapiens OX=9606 GN=SUPV3L1 PE=1 SV=1
	Q9NVT9|ARMC1_HUMAN	63.84	11	2	2	31281	Armadillo repeat-containing protein 1 OS=Homo sapiens OX=9606 GN=ARMC1 PE=1 SV=1
	Q15723-4|ELF2_HUMAN	63.79	6	2	2	54261	Isoform 4 of ETS-related transcription factor Elf-2 OS=Homo sapiens OX=9606 GN=ELF2
	Q96BY9|SARAF_HUMAN	63.77	4	1	1	36975	Store-operated calcium entry-associated regulatory factor OS=Homo sapiens OX=9606 GN=SARAF PE=1 SV=1
	Q8N0X4|CLYBL_HUMAN	63.73	6	1	1	37359	Citramalyl-CoA lyase mitochondrial OS=Homo sapiens OX=9606 GN=CLYBL PE=1 SV=2
	Q9BVJ6-3|UT14A_HUMAN	63.73	2	1	1	82005	Isoform 3 of U3 small nucleolar RNA-associated protein 14 homolog A OS=Homo sapiens OX=9606 GN=UTP14A
	O75674-2|TM1L1_HUMAN	63.7	4	1	1	38713	Isoform 2 of TOM1-like protein 1 OS=Homo sapiens OX=9606 GN=TOM1L1
	P33176|KINH_HUMAN	63.67	3	2	2	109685	Kinesin-1 heavy chain OS=Homo sapiens OX=9606 GN=KIF5B PE=1 SV=1
	P15153|RAC2_HUMAN	63.64	5	1	1	21429	Ras-related C3 botulinum toxin substrate 2 OS=Homo sapiens OX=9606 GN=RAC2 PE=1 SV=1
	Q14966|ZN638_HUMAN	63.56	2	2	2	220623	Zinc finger protein 638 OS=Homo sapiens OX=9606 GN=ZNF638 PE=1 SV=2
	Q9H5N1-2|RABE2_HUMAN	63.54	2	1	1	59316	Isoform 2 of Rab GTPase-binding effector protein 2 OS=Homo sapiens OX=9606 GN=RABEP2
	Q9P2D1|CHD7_HUMAN	63.34	1	2	2	335928	Chromodomain-helicase-DNA-binding protein 7 OS=Homo sapiens OX=9606 GN=CHD7 PE=1 SV=3
	P42858|HD_HUMAN	63.33	1	1	1	347603	Huntingtin OS=Homo sapiens OX=9606 GN=HTT PE=1 SV=2
	Q86WR7|PRSR2_HUMAN	63.32	3	1	1	45802	Proline and serine-rich protein 2 OS=Homo sapiens OX=9606 GN=PROSER2 PE=1 SV=2
	O14579-2|COPE_HUMAN	63.24	5	1	1	28797	Isoform 2 of Coatomer subunit epsilon OS=Homo sapiens OX=9606 GN=COPE
	Q9NQH7-2|XPP3_HUMAN	63.22	6	2	1	48112	Isoform 2 of Xaa-Pro aminopeptidase 3 OS=Homo sapiens OX=9606 GN=XPNPEP3
	P38117|ETFB_HUMAN	63.21	5	1	1	27844	Electron transfer flavoprotein subunit beta OS=Homo sapiens OX=9606 GN=ETFB PE=1 SV=3
	O00330-3|ODPX_HUMAN	63.2	3	1	1	51460	Isoform 3 of Pyruvate dehydrogenase protein X component mitochondrial OS=Homo sapiens OX=9606 GN=PDHX
	P49585|PCY1A_HUMAN	63.17	4	2	2	41731	Choline-phosphate cytidylyltransferase A OS=Homo sapiens OX=9606 GN=PCYT1A PE=1 SV=2
	Q99569-2|PKP4_HUMAN	63.12	1	1	1	127144	Isoform 2 of Plakophilin-4 OS=Homo sapiens OX=9606 GN=PKP4
	Q9BW83|IFT27_HUMAN	63.06	11	1	1	20480	Intraflagellar transport protein 27 homolog OS=Homo sapiens OX=9606 GN=IFT27 PE=1 SV=1
	P30405|PPIF_HUMAN	62.99	12	3	3	22040	Peptidyl-prolyl cis-trans isomerase F mitochondrial OS=Homo sapiens OX=9606 GN=PPIF PE=1 SV=1
	P25054-2|APC_HUMAN	62.71	1	1	1	300438	Isoform 2 of Adenomatous polyposis coli protein OS=Homo sapiens OX=9606 GN=APC
	P62269|RS18_HUMAN	62.71	11	2	2	17719	40S ribosomal protein S18 OS=Homo sapiens OX=9606 GN=RPS18 PE=1 SV=3
	P61619-3|S61A1_HUMAN	62.62	6	2	2	38849	Isoform 3 of Protein transport protein Sec61 subunit alpha isoform 1 OS=Homo sapiens OX=9606 GN=SEC61A1
	Q96EY8|MMAB_HUMAN	62.59	10	2	2	27388	Corrinoid adenosyltransferase OS=Homo sapiens OX=9606 GN=MMAB PE=1 SV=1	51
	P61960|UFM1_HUMAN	62.57	18	1	1	9118	Ubiquitin-fold modifier 1 OS=Homo sapiens OX=9606 GN=UFM1 PE=1 SV=1
	Q4V328-4|GRAP1_HUMAN	62.57	3	2	2	92754	Isoform 4 of GRIP1-associated protein 1 OS=Homo sapiens OX=9606 GN=GRIPAP1
	Q5JRA6|TGO1_HUMAN	62.46	1	1	1	213700	Transport and Golgi organization protein 1 homolog OS=Homo sapiens OX=9606 GN=MIA3 PE=1 SV=1
	Q9Y3I1-3|FBX7_HUMAN	62.41	5	2	2	45781	Isoform 3 of F-box only protein 7 OS=Homo sapiens OX=9606 GN=FBXO7
	P49773|HINT1_HUMAN	62.28	7	1	1	13802	Histidine triad nucleotide-binding protein 1 OS=Homo sapiens OX=9606 GN=HINT1 PE=1 SV=2
	P42285|MTREX_HUMAN	62.25	1	1	1	117805	Exosome RNA helicase MTR4 OS=Homo sapiens OX=9606 GN=MTREX PE=1 SV=3
	P26440-2|IVD_HUMAN	62.18	6	2	2	43056	Isoform 2 of Isovaleryl-CoA dehydrogenase mitochondrial OS=Homo sapiens OX=9606 GN=IVD
	P62837-2|UB2D2_HUMAN	62.15	9	1	1	13635	Isoform 2 of Ubiquitin-conjugating enzyme E2 D2 OS=Homo sapiens OX=9606 GN=UBE2D2
	P56524|HDAC4_HUMAN	62.12	1	1	1	119040	Histone deacetylase 4 OS=Homo sapiens OX=9606 GN=HDAC4 PE=1 SV=3
	Q9H4A4|AMPB_HUMAN	62.03	2	1	1	72596	Aminopeptidase B OS=Homo sapiens OX=9606 GN=RNPEP PE=1 SV=2
	Q5JTD0-2|TJAP1_HUMAN	62.02	4	2	2	60721	Isoform 2 of Tight junction-associated protein 1 OS=Homo sapiens OX=9606 GN=TJAP1
	Q147X3|NAA30_HUMAN	61.97	4	1	1	39320	N-alpha-acetyltransferase 30 OS=Homo sapiens OX=9606 GN=NAA30 PE=1 SV=1
	Q02083-3|NAAA_HUMAN	61.95	4	1	1	22020	Isoform 3 of N-acylethanolamine-hydrolyzing acid amidase OS=Homo sapiens OX=9606 GN=NAAA
	O43318-4|M3K7_HUMAN	61.84	3	1	1	53740	Isoform 1D of Mitogen-activated protein kinase kinase kinase 7 OS=Homo sapiens OX=9606 GN=MAP3K7
	Q9BPU6|DPYL5_HUMAN	61.83	2	1	1	61421	Dihydropyrimidinase-related protein 5 OS=Homo sapiens OX=9606 GN=DPYSL5 PE=1 SV=1
	Q99856|ARI3A_HUMAN	61.78	2	1	1	62889	AT-rich interactive domain-containing protein 3A OS=Homo sapiens OX=9606 GN=ARID3A PE=1 SV=2
	P07099|HYEP_HUMAN	61.71	4	2	2	52949	Epoxide hydrolase 1 OS=Homo sapiens OX=9606 GN=EPHX1 PE=1 SV=1
	Q9P1F3|ABRAL_HUMAN	61.68	16	1	1	9056	Costars family protein ABRACL OS=Homo sapiens OX=9606 GN=ABRACL PE=1 SV=1
	O14929|HAT1_HUMAN	61.6	4	1	1	49513	Histone acetyltransferase type B catalytic subunit OS=Homo sapiens OX=9606 GN=HAT1 PE=1 SV=1
	Q5H9F3-2|BCORL_HUMAN	61.59	1	1	1	166957	Isoform 2 of BCL-6 corepressor-like protein 1 OS=Homo sapiens OX=9606 GN=BCORL1
	Q9UKJ3-2|GPTC8_HUMAN	61.5	1	1	1	155193	Isoform 2 of G patch domain-containing protein 8 OS=Homo sapiens OX=9606 GN=GPATCH8
	P53621|COPA_HUMAN	61.49	1	1	1	138345	Coatomer subunit alpha OS=Homo sapiens OX=9606 GN=COPA PE=1 SV=2
	Q9NRK6|ABCBA_HUMAN	61.38	2	1	1	79148	ATP-binding cassette sub-family B member 10 mitochondrial OS=Homo sapiens OX=9606 GN=ABCB10 PE=1 SV=2
	P61086-2|UBE2K_HUMAN	61.31	7	1	1	16618	Isoform 2 of Ubiquitin-conjugating enzyme E2 K OS=Homo sapiens OX=9606 GN=UBE2K
	Q9NPJ3-2|ACO13_HUMAN	61.26	10	1	1	12366	Isoform 2 of Acyl-coenzyme A thioesterase 13 OS=Homo sapiens OX=9606 GN=ACOT13
	Q9UMS0-3|NFU1_HUMAN	61.24	6	1	1	25924	Isoform 3 of NFU1 iron-sulfur cluster scaffold homolog mitochondrial OS=Homo sapiens OX=9606 GN=NFU1
	Q9NQ50|RM40_HUMAN	61.12	8	1	1	24490	39S ribosomal protein L40 mitochondrial OS=Homo sapiens OX=9606 GN=MRPL40 PE=1 SV=1
	Q16698-2|DECR_HUMAN	61.11	6	2	2	34994	Isoform 2 of 2 4-dienoyl-CoA reductase mitochondrial OS=Homo sapiens OX=9606 GN=DECR1
	Q9BV86-2|NTM1A_HUMAN	60.97	10	1	1	15896	Isoform 2 of N-terminal Xaa-Pro-Lys N-methyltransferase 1 OS=Homo sapiens OX=9606 GN=NTMT1
	Q13242|SRSF9_HUMAN	60.82	5	1	1	25542	Serine/arginine-rich splicing factor 9 OS=Homo sapiens OX=9606 GN=SRSF9 PE=1 SV=1
	Q96GA3|LTV1_HUMAN	60.8	4	2	2	54855	Protein LTV1 homolog OS=Homo sapiens OX=9606 GN=LTV1 PE=1 SV=1
	Q13416|ORC2_HUMAN	60.76	5	3	3	65972	Origin recognition complex subunit 2 OS=Homo sapiens OX=9606 GN=ORC2 PE=1 SV=2
	Q99436|PSB7_HUMAN	60.65	7	2	2	29965	Proteasome subunit beta type-7 OS=Homo sapiens OX=9606 GN=PSMB7 PE=1 SV=1
	O75448-2|MED24_HUMAN	60.62	1	1	1	108938	Isoform 2 of Mediator of RNA polymerase II transcription subunit 24 OS=Homo sapiens OX=9606 GN=MED24
	P28482|MK01_HUMAN	60.61	5	2	2	41390	Mitogen-activated protein kinase 1 OS=Homo sapiens OX=9606 GN=MAPK1 PE=1 SV=3
	Q9UM22|EPDR1_HUMAN	60.61	9	2	2	25437	Mammalian ependymin-related protein 1 OS=Homo sapiens OX=9606 GN=EPDR1 PE=1 SV=2
	O75896|TUSC2_HUMAN	60.59	19	2	2	12074	Tumor suppressor candidate 2 OS=Homo sapiens OX=9606 GN=TUSC2 PE=1 SV=3
	Q9UHY7|ENOPH_HUMAN	60.47	5	1	1	28933	Enolase-phosphatase E1 OS=Homo sapiens OX=9606 GN=ENOPH1 PE=1 SV=1
	Q8IWL3|HSC20_HUMAN	60.31	8	2	2	27422	Iron-sulfur cluster co-chaperone protein HscB OS=Homo sapiens OX=9606 GN=HSCB PE=1 SV=3
	Q8N490-2|PNKD_HUMAN	60.28	8	1	1	15397	Isoform 2 of Probable hydrolase PNKD OS=Homo sapiens OX=9606 GN=PNKD
	O00762-2|UBE2C_HUMAN	60.26	15	2	2	15765	Isoform 2 of Ubiquitin-conjugating enzyme E2 C OS=Homo sapiens OX=9606 GN=UBE2C
	Q16718-2|NDUA5_HUMAN	60.22	9	1	1	13563	Isoform 2 of NADH dehydrogenase [ubiquinone] 1 alpha subcomplex subunit 5 OS=Homo sapiens OX=9606 GN=NDUFA5
	P54136-2|SYRC_HUMAN	60.2	2	1	1	67141	Isoform Monomeric of Arginine--tRNA ligase cytoplasmic OS=Homo sapiens OX=9606 GN=RARS
	O43760|SNG2_HUMAN	60.18	4	1	1	24810	Synaptogyrin-2 OS=Homo sapiens OX=9606 GN=SYNGR2 PE=1 SV=1
	Q9GZL7|WDR12_HUMAN	60.18	4	2	2	47708	Ribosome biogenesis protein WDR12 OS=Homo sapiens OX=9606 GN=WDR12 PE=1 SV=2
	Q9NVA1-5|UQCC1_HUMAN	60.14	4	1	1	26963	Isoform 5 of Ubiquinol-cytochrome-c reductase complex assembly factor 1 OS=Homo sapiens OX=9606 GN=UQCC1
	Q9NY27|PP4R2_HUMAN	60.12	5	2	2	46898	Serine/threonine-protein phosphatase 4 regulatory subunit 2 OS=Homo sapiens OX=9606 GN=PPP4R2 PE=1 SV=3
	O75175|CNOT3_HUMAN	60.1	2	2	2	81872	CCR4-NOT transcription complex subunit 3 OS=Homo sapiens OX=9606 GN=CNOT3 PE=1 SV=1
	Q96JP5-2|ZFP91_HUMAN	59.93	4	1	1	59571	Isoform 2 of E3 ubiquitin-protein ligase ZFP91 OS=Homo sapiens OX=9606 GN=ZFP91
	Q9UPU5|UBP24_HUMAN	59.93	1	2	2	294364	Ubiquitin carboxyl-terminal hydrolase 24 OS=Homo sapiens OX=9606 GN=USP24 PE=1 SV=3
	O60493-2|SNX3_HUMAN	59.92	12	2	2	14766	Isoform 2 of Sorting nexin-3 OS=Homo sapiens OX=9606 GN=SNX3
	Q9Y376|CAB39_HUMAN	59.84	3	1	1	39869	Calcium-binding protein 39 OS=Homo sapiens OX=9606 GN=CAB39 PE=1 SV=1
	P12532|KCRU_HUMAN	59.83	2	1	1	47037	Creatine kinase U-type mitochondrial OS=Homo sapiens OX=9606 GN=CKMT1A PE=1 SV=1
	Q08378|GOGA3_HUMAN	59.81	1	1	1	167354	Golgin subfamily A member 3 OS=Homo sapiens OX=9606 GN=GOLGA3 PE=1 SV=2
	P78540|ARGI2_HUMAN	59.8	5	1	1	38578	Arginase-2 mitochondrial OS=Homo sapiens OX=9606 GN=ARG2 PE=1 SV=1
	Q92974-3|ARHG2_HUMAN	59.6	3	2	2	108242	Isoform 3 of Rho guanine nucleotide exchange factor 2 OS=Homo sapiens OX=9606 GN=ARHGEF2
	Q9Y6R0|NUMBL_HUMAN	59.21	3	2	1	64891	Numb-like protein OS=Homo sapiens OX=9606 GN=NUMBL PE=1 SV=1
	P51570|GALK1_HUMAN	59.2	7	3	3	42272	Galactokinase OS=Homo sapiens OX=9606 GN=GALK1 PE=1 SV=1
	Q9Y3B4|SF3B6_HUMAN	59.1	10	1	1	14585	Splicing factor 3B subunit 6 OS=Homo sapiens OX=9606 GN=SF3B6 PE=1 SV=1
	Q6PCB5|RSBNL_HUMAN	58.98	2	1	1	94870	Lysine-specific demethylase RSBN1L OS=Homo sapiens OX=9606 GN=RSBN1L PE=1 SV=2
	Q14197|ICT1_HUMAN	58.95	6	1	1	23630	Peptidyl-tRNA hydrolase ICT1 mitochondrial OS=Homo sapiens OX=9606 GN=MRPL58 PE=1 SV=1
	Q13724-2|MOGS_HUMAN	58.87	2	1	1	80703	Isoform 2 of Mannosyl-oligosaccharide glucosidase OS=Homo sapiens OX=9606 GN=MOGS
	P48426-2|PI42A_HUMAN	58.77	4	1	1	39802	Isoform 2 of Phosphatidylinositol 5-phosphate 4-kinase type-2 alpha OS=Homo sapiens OX=9606 GN=PIP4K2A
	P49419-2|AL7A1_HUMAN	58.65	4	2	2	55366	Isoform 2 of Alpha-aminoadipic semialdehyde dehydrogenase OS=Homo sapiens OX=9606 GN=ALDH7A1
	Q92538-3|GBF1_HUMAN	58.35	1	1	1	206015	Isoform 3 of Golgi-specific brefeldin A-resistance guanine nucleotide exchange factor 1 OS=Homo sapiens OX=9606 GN=GBF1
	P15104|GLNA_HUMAN	58.34	10	2	2	42064	Glutamine synthetase OS=Homo sapiens OX=9606 GN=GLUL PE=1 SV=4
	Q9UBI1|COMD3_HUMAN	58.27	6	1	1	22151	COMM domain-containing protein 3 OS=Homo sapiens OX=9606 GN=COMMD3 PE=1 SV=1
	P13984|T2FB_HUMAN	58.2	7	2	2	28380	General transcription factor IIF subunit 2 OS=Homo sapiens OX=9606 GN=GTF2F2 PE=1 SV=2
	Q14135|VGLL4_HUMAN	58.2	3	1	1	30948	Transcription cofactor vestigial-like protein 4 OS=Homo sapiens OX=9606 GN=VGLL4 PE=1 SV=4
	Q8WVT3|TPC12_HUMAN	58.13	4	2	2	79375	Trafficking protein particle complex subunit 12 OS=Homo sapiens OX=9606 GN=TRAPPC12 PE=1 SV=3
	Q96KR6|F210B_HUMAN	58.11	7	1	1	20424	Protein FAM210B mitochondrial OS=Homo sapiens OX=9606 GN=FAM210B PE=1 SV=2
	P52948-4|NUP98_HUMAN	58.07	2	2	2	96074	Isoform 4 of Nuclear pore complex protein Nup98-Nup96 OS=Homo sapiens OX=9606 GN=NUP98
	P19623|SPEE_HUMAN	58.04	5	2	2	33825	Spermidine synthase OS=Homo sapiens OX=9606 GN=SRM PE=1 SV=1
	Q9Y277|VDAC3_HUMAN	58.03	7	1	1	30659	Voltage-dependent anion-selective channel protein 3 OS=Homo sapiens OX=9606 GN=VDAC3 PE=1 SV=1
	Q14558|KPRA_HUMAN	58	4	1	1	39394	Phosphoribosyl pyrophosphate synthase-associated protein 1 OS=Homo sapiens OX=9606 GN=PRPSAP1 PE=1 SV=2
	Q01433-5|AMPD2_HUMAN	57.83	2	2	2	88289	Isoform 5 of AMP deaminase 2 OS=Homo sapiens OX=9606 GN=AMPD2
	P82663|RT25_HUMAN	57.69	8	1	1	20116	28S ribosomal protein S25 mitochondrial OS=Homo sapiens OX=9606 GN=MRPS25 PE=1 SV=1
	Q9Y6Q9-4|NCOA3_HUMAN	57.44	1	1	1	147499	Isoform 4 of Nuclear receptor coactivator 3 OS=Homo sapiens OX=9606 GN=NCOA3
	Q99717|SMAD5_HUMAN	57.42	2	1	1	52258	Mothers against decapentaplegic homolog 5 OS=Homo sapiens OX=9606 GN=SMAD5 PE=1 SV=1
	Q9ULU4-19|PKCB1_HUMAN	57.3	2	1	1	138029	Isoform 19 of Protein kinase C-binding protein 1 OS=Homo sapiens OX=9606 GN=ZMYND8
	Q02218-2|ODO1_HUMAN	57.14	1	2	2	115514	Isoform 2 of 2-oxoglutarate dehydrogenase mitochondrial OS=Homo sapiens OX=9606 GN=OGDH
	Q96T51-2|RUFY1_HUMAN	57.03	3	2	2	69078	Isoform 2 of RUN and FYVE domain-containing protein 1 OS=Homo sapiens OX=9606 GN=RUFY1
	Q15785|TOM34_HUMAN	57.02	7	2	2	34559	Mitochondrial import receptor subunit TOM34 OS=Homo sapiens OX=9606 GN=TOMM34 PE=1 SV=2
	Q8IY95-2|TM192_HUMAN	57.02	4	1	1	30549	Isoform 2 of Transmembrane protein 192 OS=Homo sapiens OX=9606 GN=TMEM192
	P18031|PTN1_HUMAN	57.01	3	1	1	49967	Tyrosine-protein phosphatase non-receptor type 1 OS=Homo sapiens OX=9606 GN=PTPN1 PE=1 SV=1
	P61803|DAD1_HUMAN	56.97	11	1	1	12497	Dolichyl-diphosphooligosaccharide--protein glycosyltransferase subunit DAD1 OS=Homo sapiens OX=9606 GN=DAD1 PE=1 SV=3
	Q7RTV0|PHF5A_HUMAN	56.93	12	1	1	12405	PHD finger-like domain-containing protein 5A OS=Homo sapiens OX=9606 GN=PHF5A PE=1 SV=1
	P00403|COX2_HUMAN	56.78	4	1	1	25565	Cytochrome c oxidase subunit 2 OS=Homo sapiens OX=9606 GN=MT-CO2 PE=1 SV=1
	Q4ZIN3-2|MBRL_HUMAN	56.67	3	1	1	46431	Isoform 2 of Membralin OS=Homo sapiens OX=9606 GN=TMEM259
	Q6P4R8-3|NFRKB_HUMAN	56.55	1	1	1	138873	Isoform 3 of Nuclear factor related to kappa-B-binding protein OS=Homo sapiens OX=9606 GN=NFRKB
	Q8IVW6-4|ARI3B_HUMAN	56.4	3	2	2	60566	Isoform 4 of AT-rich interactive domain-containing protein 3B OS=Homo sapiens OX=9606 GN=ARID3B
	Q9BWD1|THIC_HUMAN	56.35	8	2	2	41351	Acetyl-CoA acetyltransferase cytosolic OS=Homo sapiens OX=9606 GN=ACAT2 PE=1 SV=2
	Q9Y3I0|RTCB_HUMAN	56.28	2	1	1	55210	tRNA-splicing ligase RtcB homolog OS=Homo sapiens OX=9606 GN=RTCB PE=1 SV=1
	Q9GZN8|CT027_HUMAN	56.23	8	1	1	19291	UPF0687 protein C20orf27 OS=Homo sapiens OX=9606 GN=C20orf27 PE=1 SV=3
	Q96FZ2|HMCES_HUMAN	56.22	3	1	1	40575	Abasic site processing protein HMCES OS=Homo sapiens OX=9606 GN=HMCES PE=1 SV=1
	Q5HYK7-3|SH319_HUMAN	56.17	2	2	2	80131	Isoform 3 of SH3 domain-containing protein 19 OS=Homo sapiens OX=9606 GN=SH3D19
	P28676|GRAN_HUMAN	56.14	6	1	1	24010	Grancalcin OS=Homo sapiens OX=9606 GN=GCA PE=1 SV=2
	Q6ICB0|DESI1_HUMAN	56.14	5	1	1	18263	Desumoylating isopeptidase 1 OS=Homo sapiens OX=9606 GN=DESI1 PE=1 SV=1
	Q969M3|YIPF5_HUMAN	56.13	5	1	1	27989	Protein YIPF5 OS=Homo sapiens OX=9606 GN=YIPF5 PE=1 SV=1
	Q92600-3|CNOT9_HUMAN	56.03	5	1	1	29140	Isoform 3 of CCR4-NOT transcription complex subunit 9 OS=Homo sapiens OX=9606 GN=CNOT9
	Q9Y285-2|SYFA_HUMAN	55.94	3	1	1	54158	Isoform 2 of Phenylalanine--tRNA ligase alpha subunit OS=Homo sapiens OX=9606 GN=FARSA
	Q8TEU7-5|RPGF6_HUMAN	55.83	1	1	1	168913	Isoform 5 of Rap guanine nucleotide exchange factor 6 OS=Homo sapiens OX=9606 GN=RAPGEF6
	P33981-2|TTK_HUMAN	55.76	2	1	1	96944	Isoform 2 of Dual specificity protein kinase TTK OS=Homo sapiens OX=9606 GN=TTK	433
	Q15643-2|TRIPB_HUMAN	55.71	1	3	3	224200	Isoform 2 of Thyroid receptor-interacting protein 11 OS=Homo sapiens OX=9606 GN=TRIP11
	Q9P2B4|CT2NL_HUMAN	55.71	6	2	2	70158	CTTNBP2 N-terminal-like protein OS=Homo sapiens OX=9606 GN=CTTNBP2NL PE=1 SV=2
	Q8IU85-2|KCC1D_HUMAN	55.66	3	1	1	40190	Isoform 2 of Calcium/calmodulin-dependent protein kinase type 1D OS=Homo sapiens OX=9606 GN=CAMK1D
	O00469-3|PLOD2_HUMAN	55.43	2	1	1	49142	Isoform 3 of Procollagen-lysine 2-oxoglutarate 5-dioxygenase 2 OS=Homo sapiens OX=9606 GN=PLOD2
	Q4G0N4-2|NAKD2_HUMAN	55.42	5	2	2	45972	Isoform 2 of NAD kinase 2 mitochondrial OS=Homo sapiens OX=9606 GN=NADK2
	Q9UGI8-2|TES_HUMAN	55.41	2	1	1	46910	Isoform 2 of Testin OS=Homo sapiens OX=9606 GN=TES
[truncated: 450 more rows]

## Sheet: Table S2
Table S2 List of the succinylated peptides and derived proteins identified in SucAM-yne-treated cell lysate by peptide-based enrichment method
	Descriptions of Column Names:
	Protein Acession	UniProt accession number of the protein.
	Peptide sequence	Amino acid sequence idntified as a succinylated peptide.
	-10lgP	The score derived from the p-value that indicates the statistical significance of the peptide-precursor spectrum match (calculated by PEAKS Xpro(TM)). Higher value means more reliable.
	Mass	The monoisotopic mass of the peptide.
	Length	The number of amino acids in the peptide sequence.
	ppm	The precursor mass error, calculated as 106 × (precursor mass - peptide mass) / peptide mass.
	m/z	The precursor mass-to-charge ratio.
	z	The charge of the detected peptide.
	RT	The retention time (elution time) of the spectrum as recorded in the data. (minute)
	Suc position	Position of succinylated lysine residues in protein.
	Ascore	Localization score assinged to modifications on the peptides (-10log of a p-value, calculated by PEAKS Xpro(TM)). Higher value means more reliable.
	PTM	Identified post-translational modifications.
	Desciption	Name of protein.
	Protein Accession	Peptide sequence	-10lgP	Mass	Length	ppm	m/z	z	RT	Suc position	Ascore (K)	PTM	Desciption
	P29966|MARCS_HUMAN	K.EAPAEGEAAEPGSPTAAEGEAASAASSTSSPK(+238.11).A	100.64	3152.4	32	0.6	1051.81	3	27.93	137	1000	Suc(Tz)-C3-NH2	Myristoylated alanine-rich C-kinase substrate OS=Homo sapiens OX=9606 GN=MARCKS PE=1 SV=4
	P07814|SYEP_HUMAN	K.TGQEYKPGNPPAEIGQNISSNSSASILESK(+238.11).S	99.09	3340.62	30	-0.2	836.161	4	57.57	824	181.78	Suc(Tz)-C3-NH2	Bifunctional glutamate/proline--tRNA ligase OS=Homo sapiens OX=9606 GN=EPRS PE=1 SV=5
	P43487-2|RANG_HUMAN	K.DTHEDHDTSTENTDESNHDPQFEPIVSLPEQEIK(+238.11).T	97.87	4170.82	34	1.3	1043.71	4	34.95	39	1000	Carbamidomethylation; Suc(Tz)-C3-NH2	Isoform 2 of Ran-specific GTPase-activating protein OS=Homo sapiens OX=9606 GN=RANBP1
	Q12931|TRAP1_HUMAN	K.AFLDALQNQAEASSK(+238.11).I	95.04	1829.89	15	1.1	915.954	2	34.44	196	1000	Suc(Tz)-C3-NH2	Heat shock protein 75 kDa mitochondrial OS=Homo sapiens OX=9606 GN=TRAP1 PE=1 SV=3
	Q9H3P7|GCP60_HUMAN	K.QQEVVVAGSSLPTSSK(+238.11).V	90.67	1853.95	16	1.1	927.982	2	26.85	322	1000	Oxidation (M); Suc(Tz)-C3-NH2	Golgi resident protein GCP60 OS=Homo sapiens OX=9606 GN=ACBD3 PE=1 SV=4
	O00193|SMAP_HUMAN	K.INEELESQYQQSMDSK(+238.11).L	89.25	2165.95	16	0	1083.98	2	28.54	91	1000	Suc(Tz)-C3-NH2	Small acidic protein OS=Homo sapiens OX=9606 GN=SMAP PE=1 SV=1
	P67809|YBOX1_HUMAN	R.NYQQNYQNSESGEK(+238.11)NEGSESAPEGQAQQR.R	88.63	3494.5	29	0.8	874.632	4	20.34	170	1000	Suc(Tz)-C3-NH2	Y-box-binding protein 1 OS=Homo sapiens OX=9606 GN=YBX1 PE=1 SV=3
	O95721|SNP29_HUMAN	K.SK(+238.11)PVETPPEQNGTLTSQPNNR.L	87.54	2531.24	21	1	844.754	3	23.13	126	1000	Suc(Tz)-C3-NH2	Synaptosomal-associated protein 29 OS=Homo sapiens OX=9606 GN=SNAP29 PE=1 SV=1
	Q14157|UBP2L_HUMAN	K.TPSTMENDSSNLDPSQAPSLAQPLVFSNSK(+238.11).Q	85.52	3399.59	30	0.7	1134.2	3	54.39	320	1000	Suc(Tz)-C3-NH2	Ubiquitin-associated protein 2-like OS=Homo sapiens OX=9606 GN=UBAP2L PE=1 SV=2
	O14757-3|CHK1_HUMAN	R.VTSGGVSESPSGFSK(+238.11).H	85.21	1662.78	15	1.4	832.401	2	23	292	1000	Suc(Tz)-C3-NH2	Isoform 3 of Serine/threonine-protein kinase Chk1 OS=Homo sapiens OX=9606 GN=CHEK1
	Q14247|SRC8_HUMAN	K.NASTFEDVTQVSSAYQK(+238.11).T	84.49	2111.98	17	-0.2	1056.99	2	31.54	336	1000	Suc(Tz)-C3-NH2	Src substrate cortactin OS=Homo sapiens OX=9606 GN=CTTN PE=1 SV=2
	P61923-2|COPZ1_HUMAN	R.GEDVPLTEQTVSQVLQSAK(+238.11).E	83.72	2266.14	19	0.9	756.389	3	40.27	117	1000	Suc(Tz)-C3-NH2	Isoform 2 of Coatomer subunit zeta-1 OS=Homo sapiens OX=9606 GN=COPZ1
	Q14157|UBP2L_HUMAN	K.TPSTM(+15.99)ENDSSNLDPSQAPSLAQPLVFSNSK(+238.11).Q	83.26	3415.58	30	-2.1	1139.53	3	52.5	320	1000	Suc(Tz)-C3-NH2	Ubiquitin-associated protein 2-like OS=Homo sapiens OX=9606 GN=UBAP2L PE=1 SV=2
	Q9Y520-4|PRC2C_HUMAN	K.AAGSPSSSDQDEK(+238.11)LPGQDESTAGTSEQNDILK.V	82.9	3499.58	32	0.2	875.903	4	27.88	196	77.6	Suc(Tz)-C3-NH2	Isoform 4 of Protein PRRC2C OS=Homo sapiens OX=9606 GN=PRRC2C
	O60716-24|CTND1_HUMAN	R.YQEAAPNVANNTGPHAASC(+57.02)FGAK(+238.11).K	82.58	2612.18	23	0.7	654.053	4	25.61	521	1000	Suc(Tz)-C3-NH2	Isoform 3 of Catenin delta-1 OS=Homo sapiens OX=9606 GN=CTNND1
	Q9BRP8-2|PYM1_HUMAN	K.SK(+238.11)PELPPGLSPEATAPVTPSRPEGGEPGLSK.T	81.76	3319.7	31	1.5	830.935	4	57.98	55	162.85	Suc(Tz)-C3-NH2	Isoform 2 of Partner of Y14 and mago OS=Homo sapiens OX=9606 GN=PYM1
	Q9NW82|WDR70_HUMAN	K.AAEDSPYWVSPAYSK(+238.11).T	81.67	1907.87	15	5.1	954.947	2	31.7	626	1000	Carbamidomethylation; Suc(Tz)-C3-NH2	WD repeat-containing protein 70 OS=Homo sapiens OX=9606 GN=WDR70 PE=1 SV=1
	P29966|MARCS_HUMAN	K.GEAAAERPGEAAVASSPSK(+238.11).A	80.94	2021.98	19	0.9	675	3	19.31	30	1000	Carbamidomethylation; Suc(Tz)-C3-NH2	Myristoylated alanine-rich C-kinase substrate OS=Homo sapiens OX=9606 GN=MARCKS PE=1 SV=4
	Q9UK76-3|JUPI1_HUMAN	MASNIFGTPEENQASWAK(+238.11).S	80.81	2218.01	18	-0.4	1110.01	2	34.68	18	1000	Suc(Tz)-C3-NH2	Isoform 3 of Jupiter microtubule associated homolog 1 OS=Homo sapiens OX=9606 GN=JPT1
	Q8N8S7-3|ENAH_HUMAN	R.MEDTSFPSGGNAIGVNSASSK(+238.11).T	80.8	2293.03	21	0.5	765.35	3	29.26	390	1000	Suc(Tz)-C3-NH2	Isoform 3 of Protein enabled homolog OS=Homo sapiens OX=9606 GN=ENAH
	P07947|YES_HUMAN	K.YRPENTPEPVSTSVSHYGAEPTTVSPC(+57.02)PSSSAK(+238.11).G	80.25	3756.73	33	3.1	940.193	4	28.06	48	1000	Suc(Tz)-C3-NH2	Tyrosine-protein kinase Yes OS=Homo sapiens OX=9606 GN=YES1 PE=1 SV=3
	Q15459-2|SF3A1_HUMAN	R.EKQSDDEVYAPGLDIESSLK(+238.11).Q	80	2460.17	20	1.3	821.063	3	34.79	402	129.03	Suc(Tz)-C3-NH2	Isoform 2 of Splicing factor 3A subunit 1 OS=Homo sapiens OX=9606 GN=SF3A1
	Q16543|CDC37_HUMAN	R.C(+57.02)IDSGLWVPNSK(+238.11).A	79.85	1612.77	12	0.5	807.391	2	32.66	347	1000	Suc(Tz)-C3-NH2	Hsp90 co-chaperone Cdc37 OS=Homo sapiens OX=9606 GN=CDC37 PE=1 SV=1
	Q04837|SSBP_HUMAN	R.SGDSEVYQLGDVSQK(+238.11).T	79.06	1848.85	15	-0.2	925.432	2	28.7	81	1000	Suc(Tz)-C3-NH2	Single-stranded DNA-binding protein mitochondrial OS=Homo sapiens OX=9606 GN=SSBP1 PE=1 SV=1
	Q09666|AHNK_HUMAN	K.GPQVSSALNLDTSK(+238.11).F	79.01	1653.83	14	1.8	827.925	2	28.25	5612	1000	Suc(Tz)-C3-NH2	Neuroblast differentiation-associated protein AHNAK OS=Homo sapiens OX=9606 GN=AHNAK PE=1 SV=2
	P51610-4|HCFC1_HUMAN	R.SPAFVQLAPLSSK(+238.11).V	78.85	1581.85	13	2	791.935	2	35.14	1217	1000	Suc(Tz)-C3-NH2	Isoform 4 of Host cell factor 1 OS=Homo sapiens OX=9606 GN=HCFC1
	Q7L0Y3|TM10C_HUMAN	K.SSVQEEC(+57.02)VSTISSSK(+238.11)DEDPLAATR.E	78.72	2833.3	24	0.5	945.442	3	29.36	86	1000	Suc(Tz)-C3-NH2	tRNA methyltransferase 10 homolog C OS=Homo sapiens OX=9606 GN=TRMT10C PE=1 SV=2
	Q7Z739|YTHD3_HUMAN	R.AITDGQAGFGNDTLSK(+238.11).V	78.71	1831.87	16	0.9	916.943	2	27.93	180	1000	Suc(Tz)-C3-NH2	YTH domain-containing family protein 3 OS=Homo sapiens OX=9606 GN=YTHDF3 PE=1 SV=1
	Q8WTV0-2|SCRB1_HUMAN	K.DKEAIQAYSESLMTSAPK(+238.11).G	77.13	2206.06	18	0.5	736.36	3	34.14	500	114.17	Suc(Tz)-C3-NH2	Isoform 1 of Scavenger receptor class B member 1 OS=Homo sapiens OX=9606 GN=SCARB1
	Q8TC07-2|TBC15_HUMAN	K.DPYTATMIGFSK(+238.11).V	76.51	1567.73	12	0.5	784.875	2	34.49	235	1000	Carbamidomethylation; Suc(Tz)-C3-NH2	Isoform 2 of TBC1 domain family member 15 OS=Homo sapiens OX=9606 GN=TBC1D15
	Q9UKX7-2|NUP50_HUMAN	K.VAAETQSPSLFGSTK(+238.11).L	76.47	1759.87	15	1.4	880.946	2	27.9	201	1000	Suc(Tz)-C3-NH2	Isoform 2 of Nuclear pore complex protein Nup50 OS=Homo sapiens OX=9606 GN=NUP50
	Q99536-3|VAT1_HUMAN	R.EVAEAATGEDASSPPPK(+238.11)TEAASDPQHPAASEGAAAAAASPPLLR.C	76.17	4431.12	44	0.3	887.232	5	59.99	22	1000	Suc(Tz)-C3-NH2	Isoform 3 of Synaptic vesicle membrane protein VAT-1 homolog OS=Homo sapiens OX=9606 GN=VAT1
	Q15836|VAMP3_HUMAN	R.ADALQAGASQFETSAAK(+238.11).L	76.07	1902.91	17	0.4	952.461	2	29.89	66	1000	Suc(Tz)-C3-NH2	Vesicle-associated membrane protein 3 OS=Homo sapiens OX=9606 GN=VAMP3 PE=1 SV=3
	Q8N8S7-3|ENAH_HUMAN	R.M(+15.99)EDTSFPSGGNAIGVNSASSK(+238.11).T	75.93	2309.02	21	1.1	770.682	3	27.88	390	1000	Carbamidomethylation; Suc(Tz)-C3-NH2	Isoform 3 of Protein enabled homolog OS=Homo sapiens OX=9606 GN=ENAH
	Q15459-2|SF3A1_HUMAN	K.ASKPLPPAPAPDEYLVSPITGEK(+238.11).I	75.54	2614.36	23	2	654.6	4	59.22	354	176.1	Suc(Tz)-C3-NH2	Isoform 2 of Splicing factor 3A subunit 1 OS=Homo sapiens OX=9606 GN=SF3A1
	Q15758|AAAT_HUMAN	R.GPAGDATVASEK(+238.11)ESVM	75.09	1785.82	16	0.5	596.281	3	25.03	537	1000	Suc(Tz)-C3-NH2	Neutral amino acid transporter B(0) OS=Homo sapiens OX=9606 GN=SLC1A5 PE=1 SV=2
	Q96EY8|MMAB_HUMAN	R.GPQGVEDGDRPQPSSK(+238.11).T	74.51	1890.88	16	0.3	631.302	3	17.88	51	1000	Suc(Tz)-C3-NH2	Corrinoid adenosyltransferase OS=Homo sapiens OX=9606 GN=MMAB PE=1 SV=1
	Q14203-3|DCTN1_HUMAN	R.QSQIQVFEDGADTTSPETPDSSASK(+238.11).V	73.59	2862.28	25	1.4	955.102	3	31.46	98	1000	Suc(Tz)-C3-NH2	Isoform 3 of Dynactin subunit 1 OS=Homo sapiens OX=9606 GN=DCTN1
	Q15459-2|SF3A1_HUMAN	K.QSDDEVYAPGLDIESSLK(+238.11).Q	73.47	2203.03	18	2.7	1102.52	2	36.79	402	1000	Suc(Tz)-C3-NH2	Isoform 2 of Splicing factor 3A subunit 1 OS=Homo sapiens OX=9606 GN=SF3A1
	Q8TEQ6|GEMI5_HUMAN	K.STANGPDK(+238.11)NEPEVEAEQPLC(+57.02)SSQSQC(+57.02)K.E	73.43	3227.41	27	1.1	1076.81	3	26.45	1403	122.49	Suc(Tz)-C3-NH2	Gem-associated protein 5 OS=Homo sapiens OX=9606 GN=GEMIN5 PE=1 SV=3
	Q09666|AHNK_HUMAN	K.APDVEGQGLDWSLK(+238.11).I	73.24	1751.85	14	0.3	876.931	2	34.14	1125	1000	Suc(Tz)-C3-NH2	Neuroblast differentiation-associated protein AHNAK OS=Homo sapiens OX=9606 GN=AHNAK PE=1 SV=2
	P52594-2|AGFG1_HUMAN	K.SSSADFGTFNTSQSHQTASAVSK(+238.11).V	73.16	2582.16	23	0.8	861.729	3	25.61	273	1000	Suc(Tz)-C3-NH2	Isoform 2 of Arf-GAP domain and FG repeat-containing protein 1 OS=Homo sapiens OX=9606 GN=AGFG1
	O75533|SF3B1_HUMAN	K.GSETPGATPGSK(+238.11).I	73.02	1325.62	12	0.9	663.818	2	15.49	252	1000	Suc(Tz)-C3-NH2	Splicing factor 3B subunit 1 OS=Homo sapiens OX=9606 GN=SF3B1 PE=1 SV=3
	P49006|MRP_HUMAN	R.GDVTAEEAAGASPAK(+238.11).A	72.88	1610.75	15	0.5	806.385	2	20.36	25	1000	Suc(Tz)-C3-NH2	MARCKS-related protein OS=Homo sapiens OX=9606 GN=MARCKSL1 PE=1 SV=2
	Q14157|UBP2L_HUMAN	K.NPSDSAVHSPFTK(+238.11).R	71.91	1623.76	13	0.4	812.89	2	22.14	420	1000	Suc(Tz)-C3-NH2	Ubiquitin-associated protein 2-like OS=Homo sapiens OX=9606 GN=UBAP2L PE=1 SV=2
	P42167|LAP2B_HUMAN	R.VEHNQSYSQAGITETEWTSGSSK(+238.11).G	70.96	2763.24	23	0.2	922.087	3	28.06	239	1000	Suc(Tz)-C3-NH2	Lamina-associated polypeptide 2 isoforms beta/gamma OS=Homo sapiens OX=9606 GN=TMPO PE=1 SV=2
	Q9NUQ8|ABCF3_HUMAN	R.LAEPQSQGNSQVLLDAPIQLSK(+238.11).I	70.74	2573.34	22	4.1	858.793	3	37.19	95	1000	Suc(Tz)-C3-NH2	ATP-binding cassette sub-family F member 3 OS=Homo sapiens OX=9606 GN=ABCF3 PE=1 SV=2
	Q9UKY7|CDV3_HUMAN	R.KTPQGPPEIYSDTQFPSLQSTAK(+238.11).H	70.67	2757.36	23	0.5	690.348	4	59.04	203	122.99	Suc(Tz)-C3-NH2	Protein CDV3 homolog OS=Homo sapiens OX=9606 GN=CDV3 PE=1 SV=1
	Q8N183|NDUF2_HUMAN	K.GHASAPYFGK(+238.11)EEPSVAPSSTGK.T	70.63	2441.16	22	0.5	611.298	4	24.43	140	142.32	Oxidation (M); Suc(Tz)-C3-NH2	NADH dehydrogenase [ubiquinone] 1 alpha subcomplex assembly factor 2 OS=Homo sapiens OX=9606 GN=NDUFAF2 PE=1 SV=1
	O15355|PPM1G_HUMAN	R.GTEAGQVGEPGIPTGEAGPSC(+57.02)SSASDK(+238.11).L	70.2	2783.23	27	0.6	928.751	3	26.64	247	1000	Suc(Tz)-C3-NH2	Protein phosphatase 1G OS=Homo sapiens OX=9606 GN=PPM1G PE=1 SV=1
	Q8TC07-2|TBC15_HUMAN	R.K(+238.11)DSSSVVEWTQAPK.E	70.14	1798.88	14	1.2	600.636	3	25.85	68	108.61	Suc(Tz)-C3-NH2	Isoform 2 of TBC1 domain family member 15 OS=Homo sapiens OX=9606 GN=TBC1D15
	Q9NWV8-3|BABA1_HUMAN	R.SEGEGEAASADDGSLNTSGAGPK(+238.11).S	70.07	2344.01	23	-2.4	782.341	3	22.4	71	1000	Carbamidomethylation; Suc(Tz)-C3-NH2	Isoform 3 of BRISC and BRCA1-A complex member 1 OS=Homo sapiens OX=9606 GN=BABAM1
	P51003|PAPOA_HUMAN	K.EQLDTETSTTQSETIQTAASLLASQK(+238.11).T	69.94	3018.46	26	0.5	1007.16	3	56.26	715	1000	Suc(Tz)-C3-NH2	Poly(A) polymerase alpha OS=Homo sapiens OX=9606 GN=PAPOLA PE=1 SV=4
	Q8N6T3|ARFG1_HUMAN	K.IFDDVSSGVSQLASK(+238.11).V	69.93	1789.88	15	1.4	895.951	2	33.9	278	1000	Carbamidomethylation; Suc(Tz)-C3-NH2	ADP-ribosylation factor GTPase-activating protein 1 OS=Homo sapiens OX=9606 GN=ARFGAP1 PE=1 SV=2
	Q8WWM7|ATX2L_HUMAN	K.DKFTDSAIAMNSK(+238.11).V	69.67	1664.78	13	-0.1	555.935	3	26.22	218	147	Suc(Tz)-C3-NH2	Ataxin-2-like protein OS=Homo sapiens OX=9606 GN=ATXN2L PE=1 SV=2
	Q96HC4|PDLI5_HUMAN	K.EVVKPVPITSPAVSK(+238.11).V	69.61	1788.01	15	1.1	597.013	3	57.98	116	125.87	Suc(Tz)-C3-NH2	PDZ and LIM domain protein 5 OS=Homo sapiens OX=9606 GN=PDLIM5 PE=1 SV=5
	Q00013-2|EM55_HUMAN	R.VASMAQSAPSEAPSC(+57.02)SPFGK(+238.11).K	69.09	2246.01	20	0.9	749.678	3	27.83	217	1000	Suc(Tz)-C3-NH2	Isoform 2 of 55 kDa erythrocyte membrane protein OS=Homo sapiens OX=9606 GN=MPP1
	Q7Z3T8|ZFY16_HUMAN	K.SNHSDEC(+57.02)TTVQPPQENQTSSIPSPATLPVSALK(+238.11).Q	68.93	3757.79	33	-3.5	940.45	4	58.31	855	1000	Suc(Tz)-C3-NH2	Zinc finger FYVE domain-containing protein 16 OS=Homo sapiens OX=9606 GN=ZFYVE16 PE=1 SV=3
	Q9H1E3|NUCKS_HUMAN	R.K(+238.11)VVDYSQFQESDDADEDYGR.D	68.8	2603.1	20	0	868.709	3	27.98	9	1000	Suc(Tz)-C3-NH2	Nuclear ubiquitous casein and cyclin-dependent kinase substrate 1 OS=Homo sapiens OX=9606 GN=NUCKS1 PE=1 SV=1
	O95684|FR1OP_HUMAN	K.ANDEANQSDTSVSLSEPK(+238.11).S	68.79	2128.95	18	0.6	710.658	3	23.49	212	1000	Suc(Tz)-C3-NH2	FGFR1 oncogene partner OS=Homo sapiens OX=9606 GN=FGFR1OP PE=1 SV=1
	Q15758|AAAT_HUMAN	R.GPAGDATVASEK(+238.11).E	68.67	1339.64	12	0.7	670.826	2	17.41	537	1000	Suc(Tz)-C3-NH2	Neutral amino acid transporter B(0) OS=Homo sapiens OX=9606 GN=SLC1A5 PE=1 SV=2
	O95297-2|MPZL1_HUMAN	R.DYTGC(+57.02)STSESLSPVK(+238.11).Q	68.04	1867.83	15	0.4	934.92	2	25.08	212	1000	Suc(Tz)-C3-NH2	Isoform 2 of Myelin protein zero-like protein 1 OS=Homo sapiens OX=9606 GN=MPZL1
	Q9Y3D9|RT23_HUMAN	R.K(+238.11)SEHLSVRPQTALEENETQK.E	68.01	2561.28	20	-0.4	641.328	4	22.76	150	139.21	Suc(Tz)-C3-NH2	28S ribosomal protein S23 mitochondrial OS=Homo sapiens OX=9606 GN=MRPS23 PE=1 SV=2
	P49006|MRP_HUMAN	K.GEGESPPVNGTDEAAGATGDAIEPAPPSQGAEAK(+238.11).G	67.98	3414.54	34	-0.3	1139.19	3	28.22	77	1000	Suc(Tz)-C3-NH2	MARCKS-related protein OS=Homo sapiens OX=9606 GN=MARCKSL1 PE=1 SV=2
	O15372|EIF3H_HUMAN	R.K(+238.11)EGTGSTATSSSSTAGAAGK.G	67.66	1992.93	20	0	665.319	3	13.31	5	59.55	Suc(Tz)-C3-NH2	Eukaryotic translation initiation factor 3 subunit H OS=Homo sapiens OX=9606 GN=EIF3H PE=1 SV=1
	Q16890-5|TPD53_HUMAN	K.ATAAFSNVGTAISK(+238.11).K	67.53	1574.81	14	1.5	788.411	2	28.35	94	1000	Suc(Tz)-C3-NH2	Isoform 5 of Tumor protein D53 OS=Homo sapiens OX=9606 GN=TPD52L1
	Q3MHD2|LSM12_HUMAN	R.TETPPPLASLNVSK(+238.11).L	67.49	1690.89	14	1.7	846.453	2	31.91	86	1000	Carbamidomethylation; Suc(Tz)-C3-NH2	Protein LSM12 homolog OS=Homo sapiens OX=9606 GN=LSM12 PE=1 SV=2
	P16949|STMN1_HUMAN	K.AIEENNNFSK(+238.11).M	67.03	1402.65	10	0.1	702.331	2	20.78	95	1000	Suc(Tz)-C3-NH2	Stathmin OS=Homo sapiens OX=9606 GN=STMN1 PE=1 SV=3
	O60566|BUB1B_HUMAN	K.TSEDQQTAC(+57.02)GTIYSQTLSIK(+238.11).K	66.85	2468.15	20	1.1	823.725	3	32.07	667	1000	Suc(Tz)-C3-NH2	Mitotic checkpoint serine/threonine-protein kinase BUB1 beta OS=Homo sapiens OX=9606 GN=BUB1B PE=1 SV=3
	Q8N4V1|MMGT1_HUMAN	R.VLFRPSDTANSSNQDALSSNTSLK(+238.11).L	66.85	2789.36	24	-1.3	698.346	4	29.76	122	1000	Suc(Tz)-C3-NH2	Membrane magnesium transporter 1 OS=Homo sapiens OX=9606 GN=MMGT1 PE=1 SV=1
	P55265-4|DSRAD_HUMAN	K.TAESQTPTPSATSFFSGK(+238.11).S	66.65	2080.97	18	0.7	694.664	3	52	656	1000	Suc(Tz)-C3-NH2	Isoform 4 of Double-stranded RNA-specific adenosine deaminase OS=Homo sapiens OX=9606 GN=ADAR
	Q9Y520-4|PRC2C_HUMAN	R.LPSAQTPNGTDYVASGK(+238.11).S	66.59	1942.94	17	1.7	648.654	3	25.95	1976	1000	Suc(Tz)-C3-NH2	Isoform 4 of Protein PRRC2C OS=Homo sapiens OX=9606 GN=PRRC2C
	Q8WVM8-2|SCFD1_HUMAN	K.MASAPASYGSTTTK(+238.11)PMGLLSR.V	66.42	2364.16	21	1.5	592.047	4	30.58	423	1000	Suc(Tz)-C3-NH2	Isoform 2 of Sec1 family domain-containing protein 1 OS=Homo sapiens OX=9606 GN=SCFD1
	Q14157|UBP2L_HUMAN	K.SPAVATSTAAPPPPSSPLPSK(+238.11).S	66.33	2197.14	21	-1.2	733.386	3	36.95	459	1000	Suc(Tz)-C3-NH2	Ubiquitin-associated protein 2-like OS=Homo sapiens OX=9606 GN=UBAP2L PE=1 SV=2
	Q7LBC6|KDM3B_HUMAN	K.VEHSPFSSFASQASGSSSSATTVTSK(+238.11).V	66.06	2811.29	26	3.4	703.833	4	58.45	669	1000	Suc(Tz)-C3-NH2	Lysine-specific demethylase 3B OS=Homo sapiens OX=9606 GN=KDM3B PE=1 SV=2
	Q9Y2W1|TR150_HUMAN	K.ASESSK(+238.11)PWPDATYGTGSASR.A	65.95	2292.04	20	0.4	765.021	3	25.24	221	1000	Suc(Tz)-C3-NH2	Thyroid hormone receptor-associated protein 3 OS=Homo sapiens OX=9606 GN=THRAP3 PE=1 SV=2
	Q9Y6G9|DC1L1_HUMAN	R.SVSSNVASVSPIPAGSK(+238.11).K	65.81	1823.94	17	4.1	608.989	3	27.06	428	1000	Suc(Tz)-C3-NH2	Cytoplasmic dynein 1 light intermediate chain 1 OS=Homo sapiens OX=9606 GN=DYNC1LI1 PE=1 SV=3
	Q9BQP7|MGME1_HUMAN	R.GVAQTPGSVEEDALLC(+57.02)GPVSK(+238.11).H	65.64	2351.14	21	0.7	784.722	3	34.57	84	1000	Suc(Tz)-C3-NH2	Mitochondrial genome maintenance exonuclease 1 OS=Homo sapiens OX=9606 GN=MGME1 PE=1 SV=1
	P23588-2|IF4B_HUMAN	R.STPK(+238.11)EDDSSASTSQSTR.A	65.54	2020.89	17	0.5	674.639	3	15.4	304	1000	Carbamidomethylation; Suc(Tz)-C3-NH2	Isoform 2 of Eukaryotic translation initiation factor 4B OS=Homo sapiens OX=9606 GN=EIF4B
	Q96C36|P5CR2_HUMAN	R.VK(+238.11)LESPTVSTLTPSSPGK.L	65.17	2065.11	18	1.8	1033.56	2	28.22	291	120.55	Suc(Tz)-C3-NH2	Pyrroline-5-carboxylate reductase 2 OS=Homo sapiens OX=9606 GN=PYCR2 PE=1 SV=1
	Q9HCK8-2|CHD8_HUMAN	K.VVLQPQAGSSQGASSGLSVVK(+238.11).V	64.79	2236.18	21	1.6	746.402	3	28.88	141	1000	Suc(Tz)-C3-NH2	Isoform 2 of Chromodomain-helicase-DNA-binding protein 8 OS=Homo sapiens OX=9606 GN=CHD8
	O14981|BTAF1_HUMAN	K.IANVVINQSANDSK(+238.11).V	64.78	1709.87	14	0.6	855.943	2	24.01	262	1000	Suc(Tz)-C3-NH2	TATA-binding protein-associated factor 172 OS=Homo sapiens OX=9606 GN=BTAF1 PE=1 SV=2
	Q86UE4|LYRIC_HUMAN	R.K(+238.11)TEPSAWSQDTGDANTNGK.D	64.53	2244	19	-0.3	749.009	3	20.42	316	55.3	Suc(Tz)-C3-NH2	Protein LYRIC OS=Homo sapiens OX=9606 GN=MTDH PE=1 SV=2
	Q8TEQ6|GEMI5_HUMAN	K.STANGPDK(+238.11)NEPEVEAEQPLC(+57.02)SSQSQC(+57.02)KEEK.N	64.52	3613.59	30	3	904.407	4	51.95	1403	103.87	Suc(Tz)-C3-NH2	Gem-associated protein 5 OS=Homo sapiens OX=9606 GN=GEMIN5 PE=1 SV=3
	P48444-2|COPD_HUMAN	K.SEGETIMSSSMGK(+238.11).R	64.38	1580.68	13	0.6	791.348	2	25.06	168	1000	Suc(Tz)-C3-NH2	Isoform 2 of Coatomer subunit delta OS=Homo sapiens OX=9606 GN=ARCN1
	P32322|P5CR1_HUMAN	K.LDSPAGTALSPSGHTK(+238.11).L	64.35	1775.88	16	1.8	888.949	2	56.7	307	1000	Suc(Tz)-C3-NH2	Pyrroline-5-carboxylate reductase 1 mitochondrial OS=Homo sapiens OX=9606 GN=PYCR1 PE=1 SV=2
	P55327-3|TPD52_HUMAN	K.GWQDVTATSAYK(+238.11).K	64.35	1563.73	12	1	782.874	2	28.78	161	1000	Suc(Tz)-C3-NH2	Isoform 3 of Tumor protein D52 OS=Homo sapiens OX=9606 GN=TPD52
	P51610-4|HCFC1_HUMAN	R.ISVATGALEAAQGSK(+238.11).S	64.3	1639.85	15	2	820.935	2	29.5	1163	1000	Suc(Tz)-C3-NH2	Isoform 4 of Host cell factor 1 OS=Homo sapiens OX=9606 GN=HCFC1
	Q8WXI9|P66B_HUMAN	K.TPVVQNAASIVQPSPAHVGQQGLSK(+238.11).L	63.96	2750.45	25	0.9	688.619	4	30.34	224	1000	Suc(Tz)-C3-NH2	Transcriptional repressor p66-beta OS=Homo sapiens OX=9606 GN=GATAD2B PE=1 SV=1
	O00161|SNP23_HUMAN	K.TTWGDGGENSPC(+57.02)NVVSK(+238.11).Q	63.95	2044.89	17	1	682.638	3	45.14	117	1000	Suc(Tz)-C3-NH2	Synaptosomal-associated protein 23 OS=Homo sapiens OX=9606 GN=SNAP23 PE=1 SV=1
	Q15459-2|SF3A1_HUMAN	K.ASK(+238.11)PLPPAPAPDEYLVSPITGEK.I	63.95	2614.36	23	1.6	872.463	3	59.22	334	150.82	Suc(Tz)-C3-NH2	Isoform 2 of Splicing factor 3A subunit 1 OS=Homo sapiens OX=9606 GN=SF3A1
	P42167|LAP2B_HUMAN	R.RVEHNQSYSQAGITETEWTSGSSK(+238.11).G	63.73	2919.34	24	1.2	730.843	4	26.4	239	1000	Suc(Tz)-C3-NH2	Lamina-associated polypeptide 2 isoforms beta/gamma OS=Homo sapiens OX=9606 GN=TMPO PE=1 SV=2
	Q3MHD2|LSM12_HUMAN	R.LQGEVVAFDYQSK(+238.11).M	63.69	1720.84	13	1.5	861.43	2	31.25	37	1000	Suc(Tz)-C3-NH2	Protein LSM12 homolog OS=Homo sapiens OX=9606 GN=LSM12 PE=1 SV=2
	Q15942-2|ZYX_HUMAN	R.VSSGYVPPPVATPFSSK(+238.11).S	63.63	1956.99	17	2.5	653.34	3	52.79	27	1000	Suc(Tz)-C3-NH2	Isoform 2 of Zyxin OS=Homo sapiens OX=9606 GN=ZYX
	P31350-2|RIR2_HUMAN	K.GLSLVDK(+238.11)ENTPPALSGTR.V	63.51	2092.09	18	-0.7	524.03	4	59.07	90	1000	Suc(Tz)-C3-NH2	Isoform 2 of Ribonucleoside-diphosphate reductase subunit M2 OS=Homo sapiens OX=9606 GN=RRM2
	Q8WXI9|P66B_HUMAN	R.LQQQAALSPTTAPAVSSVSK(+238.11).Q	63.43	2221.17	20	-1.1	741.396	3	44.5	498	1000	Suc(Tz)-C3-NH2	Transcriptional repressor p66-beta OS=Homo sapiens OX=9606 GN=GATAD2B PE=1 SV=1
	Q9UQ35|SRRM2_HUMAN	K.SKDSLVQSC(+57.02)PGSLSLC(+57.02)AGVK(+238.11).S	63.16	2330.14	20	1.7	777.721	3	30	1040	114.47	Suc(Tz)-C3-NH2	Serine/arginine repetitive matrix protein 2 OS=Homo sapiens OX=9606 GN=SRRM2 PE=1 SV=2
	O75179-4|ANR17_HUMAN	R.APSPAPSSVPLGSEK(+238.11)PSNVSQDR.K	62.97	2544.26	23	1.8	637.073	4	55.25	1820	1000	Suc(Tz)-C3-NH2	Isoform 4 of Ankyrin repeat domain-containing protein 17 OS=Homo sapiens OX=9606 GN=ANKRD17
	Q9NVA2|SEP11_HUMAN	K.K(+238.11)AAAQLLQSQAQQSGAQQTK.K	62.97	2322.2	20	0.4	775.076	3	21.85	399	58.01	Suc(Tz)-C3-NH2	Septin-11 OS=Homo sapiens OX=9606 GN=SEPTIN11 PE=1 SV=3
	Q9UK76-3|JUPI1_HUMAN	M(+15.99)ASNIFGTPEENQASWAK(+238.11).S	62.91	2234.01	18	1.5	745.677	3	33.31	18	1000	Suc(Tz)-C3-NH2	Isoform 3 of Jupiter microtubule associated homolog 1 OS=Homo sapiens OX=9606 GN=JPT1
	Q9P0L0|VAPA_HUMAN	K.VAHSDK(+238.11)PGSTSTASFR.D	62.85	1884.91	16	0.9	472.235	4	59.98	211	1000	Suc(Tz)-C3-NH2	Vesicle-associated membrane protein-associated protein A OS=Homo sapiens OX=9606 GN=VAPA PE=1 SV=3
	Q9UKX7-2|NUP50_HUMAN	K.TNGDSQQPSSSGLASSK(+238.11).A	62.77	1887.86	17	-0.2	630.292	3	18.49	121	1000	Suc(Tz)-C3-NH2	Isoform 2 of Nuclear pore complex protein Nup50 OS=Homo sapiens OX=9606 GN=NUP50
	Q15758|AAAT_HUMAN	R.GPAGDATVASEK(+238.11)ESVM(+15.99)	62.72	1801.82	16	0.9	601.613	3	21.5	537	1000	Suc(Tz)-C3-NH2	Neutral amino acid transporter B(0) OS=Homo sapiens OX=9606 GN=SLC1A5 PE=1 SV=2
	P12236|ADT3_HUMAN	K.LLLQVQHASK(+238.11).Q	62.63	1373.78	10	0.4	687.896	2	23.99	43	1000	Suc(Tz)-C3-NH2	ADP/ATP translocase 3 OS=Homo sapiens OX=9606 GN=SLC25A6 PE=1 SV=4
	P29966|MARCS_HUMAN	K.GEPAAAAAPEAGASPVEK(+238.11).E	62.35	1859.9	18	1.4	620.975	3	21.83	105	1000	Suc(Tz)-C3-NH2	Myristoylated alanine-rich C-kinase substrate OS=Homo sapiens OX=9606 GN=MARCKS PE=1 SV=4
	P48634-2|PRC2A_HUMAN	K.RPPAAPENTPLVPSGVK(+238.11).S	62.3	1967.06	17	1	492.772	4	58.75	140	1000	Suc(Tz)-C3-NH2	Isoform 2 of Protein PRRC2A OS=Homo sapiens OX=9606 GN=PRRC2A
	Q01780-2|EXOSX_HUMAN	K.DPEPPEKEFTPYDYSQSDFK(+238.11).A	62.08	2656.16	20	0.3	665.048	4	33.49	801	51.56	Suc(Tz)-C3-NH2	Isoform 2 of Exosome component 10 OS=Homo sapiens OX=9606 GN=EXOSC10
	P50402|EMD_HUMAN	K.KEDALLYQSK(+238.11).G	62.04	1431.74	10	0.4	716.875	2	22.22	88	225.98	Suc(Tz)-C3-NH2	Emerin OS=Homo sapiens OX=9606 GN=EMD PE=1 SV=1
	Q8TEQ6|GEMI5_HUMAN	R.EPVIC(+57.02)TPVSSGFEK(+238.11).S	61.78	1786.86	14	5.2	894.44	2	31.14	815	1000	Suc(Tz)-C3-NH2	Gem-associated protein 5 OS=Homo sapiens OX=9606 GN=GEMIN5 PE=1 SV=3
	Q14157|UBP2L_HUMAN	K.QTAISQPASGNTFSHHSMVSMLGK(+238.11).G	61.71	2753.3	24	0.5	689.333	4	30.16	344	1000	Suc(Tz)-C3-NH2	Ubiquitin-associated protein 2-like OS=Homo sapiens OX=9606 GN=UBAP2L PE=1 SV=2
	Q14141-2|SEPT6_HUMAN	K.TAAELLQSQGSQAGGSQTLK(+238.11).R	61.48	2212.11	20	1.6	738.378	3	27.54	420	1000	Suc(Tz)-C3-NH2	Isoform I of Septin-6 OS=Homo sapiens OX=9606 GN=SEPTIN6
	P10809|CH60_HUMAN	R.GYISPYFINTSK(+238.11).G	61.47	1626.8	12	1.1	543.276	3	34.17	233	1000	Suc(Tz)-C3-NH2	60 kDa heat shock protein mitochondrial OS=Homo sapiens OX=9606 GN=HSPD1 PE=1 SV=2
	O43175|SERA_HUMAN	K.GTIQVITQGTSLK(+238.11).N	61.42	1582.87	13	1.3	792.442	2	30.13	364	1000	Suc(Tz)-C3-NH2	D-3-phosphoglycerate dehydrogenase OS=Homo sapiens OX=9606 GN=PHGDH PE=1 SV=4
	P42166|LAP2A_HUMAN	R.NRPPLPAGTNSK(+238.11).G	61.21	1488.78	12	0.1	497.267	3	56.44	60	1000	Suc(Tz)-C3-NH2	Lamina-associated polypeptide 2 isoform alpha OS=Homo sapiens OX=9606 GN=TMPO PE=1 SV=2
	P42167|LAP2B_HUMAN	R.NRPPLPAGTNSK(+238.11).G	61.21	1488.78	12	0.1	497.267	3	56.44	60	1000	Suc(Tz)-C3-NH2	Lamina-associated polypeptide 2 isoforms beta/gamma OS=Homo sapiens OX=9606 GN=TMPO PE=1 SV=2
	O60664-4|PLIN3_HUMAN	R.TLTAAAVSGAQPILSK(+238.11).L	61.08	1764.97	16	0.6	883.495	2	31.24	84	1000	Suc(Tz)-C3-NH2	Isoform 4 of Perilipin-3 OS=Homo sapiens OX=9606 GN=PLIN3
	O43491|E41L2_HUMAN	R.SLDGAPIGVMDQSLMK(+238.11).D	60.83	1898.92	16	0.9	633.982	3	36.98	565	1000	Suc(Tz)-C3-NH2	Band 4.1-like protein 2 OS=Homo sapiens OX=9606 GN=EPB41L2 PE=1 SV=1
	Q9UKY7|CDV3_HUMAN	K.TPQGPPEIYSDTQFPSLQSTAK(+238.11).H	60.73	2629.27	22	5	877.434	3	52.17	203	1000	Suc(Tz)-C3-NH2	Protein CDV3 homolog OS=Homo sapiens OX=9606 GN=CDV3 PE=1 SV=1
	P07197|NFM_HUMAN	R.GSPSTVSSSYK(+238.11).R	60.44	1336.63	11	0.4	669.321	2	17.89	53	1000	Suc(Tz)-C3-NH2	Neurofilament medium polypeptide OS=Homo sapiens OX=9606 GN=NEFM PE=1 SV=3
	Q8N6T3|ARFG1_HUMAN	R.VSGQPQSVTASSDK(+238.11).A	60.39	1627.78	14	-0.4	814.897	2	17.38	162	1000	Suc(Tz)-C3-NH2	ADP-ribosylation factor GTPase-activating protein 1 OS=Homo sapiens OX=9606 GN=ARFGAP1 PE=1 SV=2
	P13073|COX41_HUMAN	K.VNPIQGLASK(+238.11).W	60.09	1263.69	10	1.4	632.855	2	27.25	159	1000	Suc(Tz)-C3-NH2	Cytochrome c oxidase subunit 4 isoform 1 mitochondrial OS=Homo sapiens OX=9606 GN=COX4I1 PE=1 SV=1
	P32322|P5CR1_HUMAN	K.VKLDSPAGTALSPSGHTK(+238.11).L	60.09	2003.04	18	0.2	668.689	3	23.6	307	120.49	Suc(Tz)-C3-NH2	Pyrroline-5-carboxylate reductase 1 mitochondrial OS=Homo sapiens OX=9606 GN=PYCR1 PE=1 SV=2
	Q70E73-5|RAPH1_HUMAN	R.TESAYDWTSLSSSSIK(+238.11).S	59.72	1998.92	16	0.5	667.313	3	34.9	535	1000	Suc(Tz)-C3-NH2; Carbamidomethylation	Isoform RMO1c of Ras-associated and pleckstrin homology domains-containing protein 1 OS=Homo sapiens OX=9606 GN=RAPH1
	Q9HAV7|GRPE1_HUMAN	K.QK(+238.11)NSGQNLEEDMGQSEQK.A	59.71	2287.01	18	1.4	763.346	3	21.64	34	65.3	Suc(Tz)-C3-NH2	GrpE protein homolog 1 mitochondrial OS=Homo sapiens OX=9606 GN=GRPEL1 PE=1 SV=2
	P16949|STMN1_HUMAN	R.SK(+238.11)ESVPEFPLSPPK.K	59.67	1778.92	14	0.8	445.738	4	59.56	29	100.3	Suc(Tz)-C3-NH2	Stathmin OS=Homo sapiens OX=9606 GN=STMN1 PE=1 SV=3
	Q9UEE9|CFDP1_HUMAN	K.EKPQANVPSALPSLPAGSGLK(+238.11).R	59.38	2298.23	21	1.6	767.086	3	59.01	219	69.24	Suc(Tz)-C3-NH2	Craniofacial development protein 1 OS=Homo sapiens OX=9606 GN=CFDP1 PE=1 SV=1
	P50990-3|TCPQ_HUMAN	K.TAEELMNFSK(+238.11).G	59.34	1406.65	10	0.1	704.332	2	30.85	197	1000	Suc(Tz)-C3-NH2	Isoform 3 of T-complex protein 1 subunit theta OS=Homo sapiens OX=9606 GN=CCT8
	P29966|MARCS_HUMAN	K.EELQANGSAPAADKEEPAAAGSGAASPSAAEK(+238.11).G	59.31	3219.49	32	0.4	805.88	4	23.05	87	60.34	Suc(Tz)-C3-NH2	Myristoylated alanine-rich C-kinase substrate OS=Homo sapiens OX=9606 GN=MARCKS PE=1 SV=4
	Q8NBF6-2|AVL9_HUMAN	K.AVGQSVGGAFSSAK(+238.11).T	59.19	1502.75	14	0.9	501.924	3	24.48	565	1000	Suc(Tz)-C3-NH2	Isoform 2 of Late secretory pathway protein AVL9 homolog OS=Homo sapiens OX=9606 GN=AVL9
	Q8NC51|PAIRB_HUMAN	K.SAAQAAAQTNSNAAGK(+238.11).Q	59.1	1697.81	16	0.6	849.912	2	15.86	68	1000	Suc(Tz)-C3-NH2	Plasminogen activator inhibitor 1 RNA-binding protein OS=Homo sapiens OX=9606 GN=SERBP1 PE=1 SV=2
	O43741|AAKB2_HUMAN	K.IMVGSTDDPSVFSLPDSK(+238.11).L	59.02	2132.01	18	0.6	711.678	3	37.25	52	1000	Suc(Tz)-C3-NH2	5'-AMP-activated protein kinase subunit beta-2 OS=Homo sapiens OX=9606 GN=PRKAB2 PE=1 SV=1
	P24534|EF1B_HUMAN	R.SIQADGLVWGSSK(+238.11).L	58.97	1584.79	13	0.3	793.402	2	32.21	176	1000	Suc(Tz)-C3-NH2	Elongation factor 1-beta OS=Homo sapiens OX=9606 GN=EEF1B2 PE=1 SV=3
	Q9NZT2-2|OGFR_HUMAN	R.KVDEGAGDSAAVASGGAQTLALAGSPAPSGHPK(+238.11).A	58.67	3211.59	33	0.1	803.904	4	59.59	492	81.54	Suc(Tz)-C3-NH2	Isoform 2 of Opioid growth factor receptor OS=Homo sapiens OX=9606 GN=OGFR
	Q9UJU6|DBNL_HUMAN	R.FQDVGPQAPVGSVYQK(+238.11).T	58.53	1956.97	16	1.4	653.331	3	48.94	164	1000	Suc(Tz)-C3-NH2	Drebrin-like protein OS=Homo sapiens OX=9606 GN=DBNL PE=1 SV=1
	P50579-3|MAP2_HUMAN	R.SALEDK(+238.11)ERDEDDEDGDGDGDGATGK.K	58.48	2833.14	25	-1.6	709.291	4	21.51	79	70.17	Suc(Tz)-C3-NH2	Isoform 3 of Methionine aminopeptidase 2 OS=Homo sapiens OX=9606 GN=METAP2
	P54886-2|P5CS_HUMAN	K.FASYLTFSPSEVK(+238.11).S	58.4	1712.84	13	-0.5	857.427	2	35.93	660	1000	Suc(Tz)-C3-NH2	Isoform Short of Delta-1-pyrroline-5-carboxylate synthase OS=Homo sapiens OX=9606 GN=ALDH18A1
	Q8IWC1-2|MA7D3_HUMAN	K.NC(+57.02)PPSPLPLISK(+238.11).Q	58.38	1559.81	12	1	520.945	3	55.25	490	1000	Suc(Tz)-C3-NH2	Isoform 2 of MAP7 domain-containing protein 3 OS=Homo sapiens OX=9606 GN=MAP7D3
	P04075|ALDOA_HUMAN	K.GILAADESTGSIAK(+238.11).R	58.29	1569.8	14	0.7	785.908	2	26.69	42	1000	Suc(Tz)-C3-NH2	Fructose-bisphosphate aldolase A OS=Homo sapiens OX=9606 GN=ALDOA PE=1 SV=2
	P62633-2|CNBP_HUMAN	R.C(+57.02)GETGHVAINC(+57.02)SK(+238.11).T	58.19	1669.73	13	0.7	557.584	3	18.17	145	1000	Suc(Tz)-C3-NH2	Isoform 2 of Cellular nucleic acid-binding protein OS=Homo sapiens OX=9606 GN=CNBP
	P35611-2|ADDA_HUMAN	R.SLVQGELVTASK(+238.11).A	58.01	1468.79	12	0.8	735.402	2	51.88	543	1000	Suc(Tz)-C3-NH2	Isoform 2 of Alpha-adducin OS=Homo sapiens OX=9606 GN=ADD1
	Q13263|TIF1B_HUMAN	K.QGSGSSQPMEVQEGYGFGSGDDPYSSAEPHVSGVK(+238.11).R	58.01	3794.64	35	1.8	949.669	4	57.58	469	1000	Suc(Tz)-C3-NH2	Transcription intermediary factor 1-beta OS=Homo sapiens OX=9606 GN=TRIM28 PE=1 SV=5
	O60664-4|PLIN3_HUMAN	K.VSGAQEMVSSAK(+238.11).D	57.97	1430.68	12	1.2	716.349	2	21.77	128	1000	Suc(Tz)-C3-NH2	Isoform 4 of Perilipin-3 OS=Homo sapiens OX=9606 GN=PLIN3
	Q15750-2|TAB1_HUMAN	R.VYPVSVPYSSAQSTSK(+238.11).T	57.76	1936.95	16	0.7	646.659	3	28.57	402	1000	Suc(Tz)-C3-NH2	Isoform 2 of TGF-beta-activated kinase 1 and MAP3K7-binding protein 1 OS=Homo sapiens OX=9606 GN=TAB1
	Q86U44|MTA70_HUMAN	R.SDSPVPTAPTSGGPK(+238.11)PSTASAVPELATDPELEKK.L	57.41	3598.8	34	1.2	900.708	4	33.41	62	86.26	Carbamidomethylation; Suc(Tz)-C3-NH2	N6-adenosine-methyltransferase catalytic subunit OS=Homo sapiens OX=9606 GN=METTL3 PE=1 SV=2
	P24928|RPB1_HUMAN	K.YSPTSPTYSPTSPVYTPTSPK(+238.11).Y	57.28	2495.19	21	0.9	832.737	3	29.52	1908	1000	Suc(Tz)-C3-NH2	DNA-directed RNA polymerase II subunit RPB1 OS=Homo sapiens OX=9606 GN=POLR2A PE=1 SV=2
	Q14694|UBP10_HUMAN	K.YSPPAISPLVSEK(+238.11).Q	57.05	1624.85	13	0.6	542.623	3	53.65	376	1000	Suc(Tz)-C3-NH2	Ubiquitin carboxyl-terminal hydrolase 10 OS=Homo sapiens OX=9606 GN=USP10 PE=1 SV=2
	O95239|KIF4A_HUMAN	K.LEDPTEVTPGLSFFNPVC(+57.02)ATPNSK(+238.11).I	56.98	2857.36	24	4	953.464	3	59.69	1165	1000	Oxidation (M); Suc(Tz)-C3-NH2	Chromosome-associated kinesin KIF4A OS=Homo sapiens OX=9606 GN=KIF4A PE=1 SV=3
	O15126|SCAM1_HUMAN	K.TVQTAAANAASTAASSAAQNAFK(+238.11).G	56.81	2389.16	23	2.9	797.397	3	51.88	334	1000	Suc(Tz)-C3-NH2	Secretory carrier-associated membrane protein 1 OS=Homo sapiens OX=9606 GN=SCAMP1 PE=1 SV=2
	Q96C36|P5CR2_HUMAN	R.VKLESPTVSTLTPSSPGK(+238.11).L	56.78	2065.11	18	-0.2	1033.56	2	58.24	307	95.58	Suc(Tz)-C3-NH2	Pyrroline-5-carboxylate reductase 2 OS=Homo sapiens OX=9606 GN=PYCR2 PE=1 SV=1
	O15355|PPM1G_HUMAN	R.GTEAGQVGEPGIPTGEAGPSC(+57.02)SSASDK(+238.11)LPR.V	56.64	3149.47	30	0.8	788.375	4	56.01	247	1000	Carbamidomethylation; Suc(Tz)-C3-NH2	Protein phosphatase 1G OS=Homo sapiens OX=9606 GN=PPM1G PE=1 SV=1
	Q7Z434-4|MAVS_HUMAN	K.QGAESDQAEPIIC(+57.02)SSGAEAPANSLPSK(+238.11).V	56.48	2951.36	27	1.4	984.794	3	30.16	156	1000	Suc(Tz)-C3-NH2	Isoform 4 of Mitochondrial antiviral-signaling protein OS=Homo sapiens OX=9606 GN=MAVS
	P98172|EFNB1_HUMAN	R.AAALSLSTLASPK(+238.11).G	56.39	1466.81	13	0.1	734.412	2	32.71	289	1000	Suc(Tz)-C3-NH2	Ephrin-B1 OS=Homo sapiens OX=9606 GN=EFNB1 PE=1 SV=1
	Q00587-2|BORG5_HUMAN	K.LSPVGWVSSSQGK(+238.11).R	56.36	1568.79	13	-0.9	785.404	2	30.66	30	1000	Suc(Tz)-C3-NH2	Isoform 2 of Cdc42 effector protein 1 OS=Homo sapiens OX=9606 GN=CDC42EP1
	P10809|CH60_HUMAN	R.TVIIEQSWGSPK(+238.11).V	56.14	1581.82	12	2.6	791.917	2	30.29	72	1000	Suc(Tz)-C3-NH2	60 kDa heat shock protein mitochondrial OS=Homo sapiens OX=9606 GN=HSPD1 PE=1 SV=2
	O95208-5|EPN2_HUMAN	K.NSDPWAASQQPASSAGK(+238.11).R	55.98	1938.88	17	2.1	970.45	2	23.83	138	1000	Suc(Tz)-C3-NH2	Isoform 4 of Epsin-2 OS=Homo sapiens OX=9606 GN=EPN2
	Q9H4A3-5|WNK1_HUMAN	K.DRPVSQPSLVGSK(+238.11)EEPPPAR.S	55.92	2383.22	20	2.2	596.815	4	59.4	175	1000	Carbamidomethylation; Suc(Tz)-C3-NH2	Isoform 4 of Serine/threonine-protein kinase WNK1 OS=Homo sapiens OX=9606 GN=WNK1
	Q05682-3|CALD1_HUMAN	K.STHQAAIVSK(+238.11).I	55.53	1278.67	10	1.2	640.342	2	15.05	439	1000	Suc(Tz)-C3-NH2	Isoform 3 of Caldesmon OS=Homo sapiens OX=9606 GN=CALD1
	Q12906|ILF3_HUMAN	K.GYNHGQGSYSYSNSYNSPGGGGGSDYNYESK(+238.11).F	55.27	3490.4	31	1.3	873.608	4	55.69	806	1000	Suc(Tz)-C3-NH2	Interleukin enhancer-binding factor 3 OS=Homo sapiens OX=9606 GN=ILF3 PE=1 SV=3
	O75400-2|PR40A_HUMAN	K.ELEDLEGYQNTIVAGSLITK(+238.11).S	55.24	2430.23	20	6.8	811.089	3	57.52	206	1000	Suc(Tz)-C3-NH2	Isoform 2 of Pre-mRNA-processing factor 40 homolog A OS=Homo sapiens OX=9606 GN=PRPF40A
	O60271-9|JIP4_HUMAN	K.FFVAVPGQVISPQSSSSGTDLTGDK(+238.11).A	55.08	2761.36	25	1.9	921.461	3	58.27	1108	1000	Carbamidomethylation; Suc(Tz)-C3-NH2	Isoform 6 of C-Jun-amino-terminal kinase-interacting protein 4 OS=Homo sapiens OX=9606 GN=SPAG9
	Q86XP3|DDX42_HUMAN	R.GNNNVMSNYEAYK(+238.11)PSTGAMGDR.L	54.87	2613.13	22	-0.5	872.051	3	28.73	686	1000	Suc(Tz)-C3-NH2	ATP-dependent RNA helicase DDX42 OS=Homo sapiens OX=9606 GN=DDX42 PE=1 SV=1
	Q02952-3|AKA12_HUMAN	K.SAESPTSPVTSETGSTFK(+238.11).K	54.81	2049.95	18	1.7	684.325	3	25.66	192	1000	Suc(Tz)-C3-NH2	Isoform 3 of A-kinase anchor protein 12 OS=Homo sapiens OX=9606 GN=AKAP12
	P42166|LAP2A_HUMAN	K.SSSSSSQPEHSAMLVSTAASPSLIK(+238.11).E	54.77	2726.32	25	0.1	909.78	3	31.5	315	1000	Suc(Tz)-C3-NH2	Lamina-associated polypeptide 2 isoform alpha OS=Homo sapiens OX=9606 GN=TMPO PE=1 SV=2
	O14828|SCAM3_HUMAN	R.EPPPAYEPPAPAPLPPPSAPSLQPSRK(+238.11).L	54.7	3025.57	27	-3.6	757.396	4	57.55	74	1000	Suc(Tz)-C3-NH2	Secretory carrier-associated membrane protein 3 OS=Homo sapiens OX=9606 GN=SCAMP3 PE=1 SV=3
	Q9NZZ3-2|CHMP5_HUMAN	R.DNLAQQSFNM(+15.99)EQANYTIQSLK(+238.11).D	54.52	2696.25	21	2.1	899.759	3	51.1	100	1000	Suc(Tz)-C3-NH2	Isoform 2 of Charged multivesicular body protein 5 OS=Homo sapiens OX=9606 GN=CHMP5
	Q9UKX7-2|NUP50_HUMAN	K.KTDPSSLGATSASFNFGK(+238.11).K	54.49	2051.99	18	1.9	685.006	3	30.62	247	85.71	Suc(Tz)-C3-NH2	Isoform 2 of Nuclear pore complex protein Nup50 OS=Homo sapiens OX=9606 GN=NUP50
	P27694|RFA1_HUMAN	K.AAGPSLSHTSGGTQSK(+238.11).V	54.4	1722.83	16	0.4	575.284	3	16.29	183	1000	Suc(Tz)-C3-NH2	Replication protein A 70 kDa DNA-binding subunit OS=Homo sapiens OX=9606 GN=RPA1 PE=1 SV=2
	O75208-2|COQ9_HUMAN	K.QQPPNSFSQQHSETQGAEK(+238.11)PDPESSHSPPR.Y	54.36	3551.61	30	3.1	711.33	5	20.57	70	1000	Suc(Tz)-C3-NH2	Isoform 2 of Ubiquinone biosynthesis protein COQ9 mitochondrial OS=Homo sapiens OX=9606 GN=COQ9
	P55327-3|TPD52_HUMAN	K.ASAAFSSVGSVITK(+238.11).K	54.31	1561.81	14	1.8	781.914	2	52.48	187	1000	Suc(Tz)-C3-NH2	Isoform 3 of Tumor protein D52 OS=Homo sapiens OX=9606 GN=TPD52
	P0DP24|CALM2_HUMAN	R.VFDK(+238.11)DGNGYISAAELR.H	54.05	1991.97	16	0.7	499	4	30.08	95	1000	Suc(Tz)-C3-NH2	Calmodulin-2 OS=Homo sapiens OX=9606 GN=CALM2 PE=1 SV=1
	O14654|IRS4_HUMAN	R.AFDEDEDDPYVPMRPGVATPLVSSSDYM(+15.99)PM(+15.99)APQNVSASK(+238.11).K	54.01	4482.99	39	-1.2	1121.75	4	58.73	729	1000	Suc(Tz)-C3-NH2	Insulin receptor substrate 4 OS=Homo sapiens OX=9606 GN=IRS4 PE=1 SV=1
	P57737-3|CORO7_HUMAN	K.SVGGSFYLQSK(+238.11).V	53.89	1409.69	11	0.4	705.855	2	28.06	1020	1000	Suc(Tz)-C3-NH2	Isoform 3 of Coronin-7 OS=Homo sapiens OX=9606 GN=CORO7
	O76031|CLPX_HUMAN	K.SIIK(+238.11)EPESAAEAVK.L	53.87	1708.9	14	3	570.642	3	49.64	148	85.84	Suc(Tz)-C3-NH2	ATP-dependent Clp protease ATP-binding subunit clpX-like mitochondrial OS=Homo sapiens OX=9606 GN=CLPX PE=1 SV=2
	O00193|SMAP_HUMAN	K.INEELESQYQQSM(+15.99)DSK(+238.11).L	53.85	2181.95	16	-2	728.322	3	25.79	91	1000	Suc(Tz)-C3-NH2	Small acidic protein OS=Homo sapiens OX=9606 GN=SMAP PE=1 SV=1
	O75122|CLAP2_HUMAN	R.DYNPYNYSDSISPFNK(+238.11).S	53.85	2160.94	16	1.6	721.321	3	35.03	1033	1000	Suc(Tz)-C3-NH2	CLIP-associating protein 2 OS=Homo sapiens OX=9606 GN=CLASP2 PE=1 SV=3
	O75391|SPAG7_HUMAN	R.QEEEAAQQGPVVVSPASDYK(+238.11).D	53.68	2369.11	20	2	790.713	3	26.85	164	1000	Oxidation (M); Suc(Tz)-C3-NH2	Sperm-associated antigen 7 OS=Homo sapiens OX=9606 GN=SPAG7 PE=1 SV=2
	Q15654|TRIP6_HUMAN	R.TGSLK(+238.11)PNPASPLPASPYGGPTPASYTTASTPAGPAFPVQVK.V	53.6	4217.14	41	1.1	1055.29	4	59.4	137	76.61	Suc(Tz)-C3-NH2	Thyroid receptor-interacting protein 6 OS=Homo sapiens OX=9606 GN=TRIP6 PE=1 SV=3
	Q9H2P0|ADNP_HUMAN	R.LGLGGNAPVSIPQQSQSVK(+238.11).Q	53.59	2117.12	19	1.1	706.716	3	52	367	1000	Suc(Tz)-C3-NH2	Activity-dependent neuroprotector homeobox protein OS=Homo sapiens OX=9606 GN=ADNP PE=1 SV=1
	Q04637-6|IF4G1_HUMAN	K.GSSGGSGAK(+238.11)PSDAASEAARPATSTLNR.F	53.45	2740.31	27	1	549.07	5	59.4	908	1000	Suc(Tz)-C3-NH2	Isoform E of Eukaryotic translation initiation factor 4 gamma 1 OS=Homo sapiens OX=9606 GN=EIF4G1
	Q02446|SP4_HUMAN	K.TSGSQDSQPSPLALLAATC(+57.02)SK(+238.11).I	53.37	2356.13	21	2	786.386	3	58.68	57	1000	Suc(Tz)-C3-NH2	Transcription factor Sp4 OS=Homo sapiens OX=9606 GN=SP4 PE=1 SV=2
	Q9Y520-4|PRC2C_HUMAN	K.VEEKPPPAPSIATK(+238.11)PVR.T	53.37	2053.13	17	-1.7	514.289	4	60.01	2798	51.24	Suc(Tz)-C3-NH2	Isoform 4 of Protein PRRC2C OS=Homo sapiens OX=9606 GN=PRRC2C
	Q15691|MARE1_HUMAN	K.K(+238.11)PLTSSSAAPQRPISTQR.T	53.27	2162.16	18	1.2	541.547	4	59.99	151	1000	Suc(Tz)-C3-NH2	Microtubule-associated protein RP/EB family member 1 OS=Homo sapiens OX=9606 GN=MAPRE1 PE=1 SV=3
	P56181-2|NDUV3_HUMAN	K.LLATQTAAELSK(+238.11).N	53.12	1482.8	12	0.5	495.276	3	27.93	78	1000	Suc(Tz)-C3-NH2	Isoform 2 of NADH dehydrogenase [ubiquinone] flavoprotein 3 mitochondrial OS=Homo sapiens OX=9606 GN=NDUFV3
	Q13573|SNW1_HUMAN	R.YTPSQQGVAFNSGAK(+238.11).Q	53.09	1791.85	15	2	598.293	3	24.71	193	1000	Oxidation (M); Suc(Tz)-C3-NH2	SNW domain-containing protein 1 OS=Homo sapiens OX=9606 GN=SNW1 PE=1 SV=1
	P82909|RT36_HUMAN	R.SAGLPSHSSVISQHSK(+238.11).G	53.08	1858.93	16	0.5	620.65	3	19.76	57	1000	Suc(Tz)-C3-NH2	28S ribosomal protein S36 mitochondrial OS=Homo sapiens OX=9606 GN=MRPS36 PE=1 SV=2
	Q14C86-5|GAPD1_HUMAN	R.ELPPAAAIGATSLVAAPHSSSSSPSK(+238.11).D	52.98	2670.36	26	1.4	668.598	4	59.07	927	1000	Suc(Tz)-C3-NH2	Isoform 5 of GTPase-activating protein and VPS9 domain-containing protein 1 OS=Homo sapiens OX=9606 GN=GAPVD1
	Q04637-6|IF4G1_HUMAN	K.ITK(+238.11)PGSIDSNNQLFAPGGR.L	52.95	2209.12	19	-0.3	737.382	3	28.48	878	1000	Suc(Tz)-C3-NH2	Isoform E of Eukaryotic translation initiation factor 4 gamma 1 OS=Homo sapiens OX=9606 GN=EIF4G1
	Q13283|G3BP1_HUMAN	R.TFSWASVTSK(+238.11).N	52.83	1350.66	10	1.3	676.337	2	32.42	257	1000	Suc(Tz)-C3-NH2	Ras GTPase-activating protein-binding protein 1 OS=Homo sapiens OX=9606 GN=G3BP1 PE=1 SV=1
	P48634-2|PRC2A_HUMAN	K.SSDASTAQPPESQPLPASQTPASNQPK(+238.11).R	52.79	2958.4	27	0.7	987.14	3	24.38	123	1000	Suc(Tz)-C3-NH2	Isoform 2 of Protein PRRC2A OS=Homo sapiens OX=9606 GN=PRRC2A
	Q14247|SRC8_HUMAN	K.TVPVEAVTSK(+238.11).T	52.72	1267.68	10	0.2	423.566	3	22.61	346	1000	Suc(Tz)-C3-NH2	Src substrate cortactin OS=Homo sapiens OX=9606 GN=CTTN PE=1 SV=2
	Q71RC2-6|LARP4_HUMAN	R.SNVVSPTK(+238.11)NEDNGAPENSVEKPHEKPEAR.A	52.57	3396.63	29	-0.9	680.332	5	60.23	579	67.11	Suc(Tz)-C3-NH2	Isoform 6 of La-related protein 4 OS=Homo sapiens OX=9606 GN=LARP4
	Q13190-4|STX5_HUMAN	K.NTDQGVYLGLSK(+238.11).T	52.54	1531.76	12	1.6	766.89	2	28.67	22	1000	Suc(Tz)-C3-NH2	Isoform 4 of Syntaxin-5 OS=Homo sapiens OX=9606 GN=STX5
	P46821|MAP1B_HUMAN	R.ESSPLYSPTFSDSTSAVK(+238.11).E	52.51	2140	18	-0.4	714.339	3	31.22	1808	1000	Suc(Tz)-C3-NH2	Microtubule-associated protein 1B OS=Homo sapiens OX=9606 GN=MAP1B PE=1 SV=2
	Q8N183|NDUF2_HUMAN	K.EEPSVAPSSTGK(+238.11).T	52.51	1425.67	12	0.9	713.845	2	19.1	152	1000	Suc(Tz)-C3-NH2	NADH dehydrogenase [ubiquinone] 1 alpha subcomplex assembly factor 2 OS=Homo sapiens OX=9606 GN=NDUFAF2 PE=1 SV=1
	O95551|TYDP2_HUMAN	K.TYVDLTNEETTDSTTSK(+238.11).I	52.48	2141.96	17	1.3	714.995	3	26.8	99	1000	Suc(Tz)-C3-NH2	Tyrosyl-DNA phosphodiesterase 2 OS=Homo sapiens OX=9606 GN=TDP2 PE=1 SV=1
	Q5SW79-2|CE170_HUMAN	R.K(+238.11)PLTTSGFHHSEEGTSSSGSK.R	52.19	2398.11	21	0.5	600.536	4	17.06	463	55.87	Suc(Tz)-C3-NH2	Isoform 2 of Centrosomal protein of 170 kDa OS=Homo sapiens OX=9606 GN=CEP170
	P56181-2|NDUV3_HUMAN	R.K(+238.11)VASPSPSGSVLFTDEGVPK.F	52.18	2239.15	20	2	560.795	4	59.22	95	93.44	Suc(Tz)-C3-NH2	Isoform 2 of NADH dehydrogenase [ubiquinone] flavoprotein 3 mitochondrial OS=Homo sapiens OX=9606 GN=NDUFV3
	P62820-3|RAB1A_HUMAN	R.FADDTYTESYISTIGVDFK(+238.11).I	52.12	2409.1	19	0.4	804.041	3	59.38	49	1000	Suc(Tz)-C3-NH2	Isoform 3 of Ras-related protein Rab-1A OS=Homo sapiens OX=9606 GN=RAB1A
	Q14161-8|GIT2_HUMAN	K.QATTNVYQVQTGSEYTDTSNHSSLK(+238.11).R	52.11	2996.37	25	0.2	750.101	4	26.99	467	1000	Carbamidomethylation; Suc(Tz)-C3-NH2	Isoform 8 of ARF GTPase-activating protein GIT2 OS=Homo sapiens OX=9606 GN=GIT2
	O60271-9|JIP4_HUMAN	K.YNAPTSHVTPSVK(+238.11).K	52.03	1637.82	13	0.2	546.946	3	21.33	433	1000	Oxidation (M); Suc(Tz)-C3-NH2	Isoform 6 of C-Jun-amino-terminal kinase-interacting protein 4 OS=Homo sapiens OX=9606 GN=SPAG9
	P47914|RL29_HUMAN	K.AQAAAPASVPAQAPK(+238.11).R	51.96	1614.85	15	-0.2	808.431	2	21.33	149	1000	Suc(Tz)-C3-NH2	60S ribosomal protein L29 OS=Homo sapiens OX=9606 GN=RPL29 PE=1 SV=2
	O60566|BUB1B_HUMAN	R.EATHSSGFSGSSASVASTSSIK(+238.11).C	51.86	2322.07	22	0.9	775.032	3	23.64	699	1000	Suc(Tz)-C3-NH2	Mitotic checkpoint serine/threonine-protein kinase BUB1 beta OS=Homo sapiens OX=9606 GN=BUB1B PE=1 SV=3
	P49757-9|NUMB_HUMAN	R.TNPSPTNPFSSDLQK(+238.11).T	51.74	1869.89	15	1	624.303	3	50.4	343	1000	Suc(Tz)-C3-NH2	Isoform 9 of Protein numb homolog OS=Homo sapiens OX=9606 GN=NUMB
	P46821|MAP1B_HUMAN	K.TLEVVSPSQSVTGSAGHTPYYQSPTDEK(+238.11).S	51.7	3202.51	28	1.1	801.635	4	30.37	1344	1000	Suc(Tz)-C3-NH2	Microtubule-associated protein 1B OS=Homo sapiens OX=9606 GN=MAP1B PE=1 SV=2
	Q9BUJ2-4|HNRL1_HUMAN	K.QGAPTSFLPPEASQLK(+238.11)PDR.Q	51.68	2276.15	19	-0.2	570.046	4	58.99	62	1000	Suc(Tz)-C3-NH2	Isoform 4 of Heterogeneous nuclear ribonucleoprotein U-like protein 1 OS=Homo sapiens OX=9606 GN=HNRNPUL1
	P29966|MARCS_HUMAN	K.TAAKGEAAAERPGEAAVASSPSK(+238.11).A	51.6	2393.19	23	0	599.306	4	59.56	30	81.53	Suc(Tz)-C3-NH2	Myristoylated alanine-rich C-kinase substrate OS=Homo sapiens OX=9606 GN=MARCKS PE=1 SV=4
	O43491|E41L2_HUMAN	K.EVAENQQNQSSDPEEEK(+238.11)GSQPPPAAESQSSLR.R	51.52	3690.66	32	0	923.673	4	51.88	45	1000	Suc(Tz)-C3-NH2	Band 4.1-like protein 2 OS=Homo sapiens OX=9606 GN=EPB41L2 PE=1 SV=1
	P07197|NFM_HUMAN	R.SNEK(+238.11)EQLQGLNDR.F	51.45	1767.85	13	1.2	590.291	3	24.25	102	1000	Suc(Tz)-C3-NH2	Neurofilament medium polypeptide OS=Homo sapiens OX=9606 GN=NEFM PE=1 SV=3
	Q9H6T3|RPAP3_HUMAN	K.IEEVSDTSSLQPQASLK(+238.11).Q	51.34	2069.03	17	1	1035.52	2	28.57	515	1000	Suc(Tz)-C3-NH2	RNA polymerase II-associated protein 3 OS=Homo sapiens OX=9606 GN=RPAP3 PE=1 SV=2
	Q9Y450-4|HBS1L_HUMAN	K.GPPIEDAIASSDVLETASK(+238.11).S	51.32	2137.05	19	1	713.359	3	38.52	172	1000	Suc(Tz)-C3-NH2	Isoform 3 of HBS1-like protein OS=Homo sapiens OX=9606 GN=HBS1L
	Q86Y37|CACL1_HUMAN	K.AAPAPTASSTININTSTSK(+238.11).F	51.18	2069.04	19	1.3	690.688	3	39.74	121	1000	Suc(Tz)-C3-NH2; Oxidation (M)	CDK2-associated and cullin domain-containing protein 1 OS=Homo sapiens OX=9606 GN=CACUL1 PE=1 SV=1
	Q9UPN3-3|MACF1_HUMAN	K.SLSQPTPPPMPILSQSEAK(+238.11).N	51.17	2245.14	19	0.5	749.388	3	54.49	4971	1000	Suc(Tz)-C3-NH2	Isoform 3 of Microtubule-actin cross-linking factor 1 isoforms 1/2/3/5 OS=Homo sapiens OX=9606 GN=MACF1
	Q7LBC6|KDM3B_HUMAN	K.VAPSWPESHSSADSASLAK(+238.11).K	51.15	2164.02	19	1.8	722.348	3	58.49	688	1000	Suc(Tz)-C3-NH2	Lysine-specific demethylase 3B OS=Homo sapiens OX=9606 GN=KDM3B PE=1 SV=2
	Q86X29-4|LSR_HUMAN	K.AATSGVPSIYAPSTYAHLSPAK(+238.11).T	51.13	2426.22	22	1.4	607.564	4	33.6	316	1000	Suc(Tz)-C3-NH2	Isoform 4 of Lipolysis-stimulated lipoprotein receptor OS=Homo sapiens OX=9606 GN=LSR
	Q96C36|P5CR2_HUMAN	K.LESPTVSTLTPSSPGK(+238.11).L	51.03	1837.94	16	1.4	919.98	2	47.33	307	1000	Carbamidomethylation; Suc(Tz)-C3-NH2	Pyrroline-5-carboxylate reductase 2 OS=Homo sapiens OX=9606 GN=PYCR2 PE=1 SV=1
	Q9Y619|ORNT1_HUMAN	R.LQTMYEMETSGK(+238.11).I	51.02	1654.73	12	-1	828.373	2	27.51	145	1000	Carbamidomethylation; Suc(Tz)-C3-NH2	Mitochondrial ornithine transporter 1 OS=Homo sapiens OX=9606 GN=SLC25A15 PE=1 SV=1
	P57076|CF298_HUMAN	K.RLEENDDDAYLNSPWADNTALK(+238.11).R	50.91	2787.27	22	-0.8	697.825	4	34.38	276	1000	Suc(Tz)-C3-NH2	Cilia- and flagella-associated protein 298 OS=Homo sapiens OX=9606 GN=CFAP298 PE=1 SV=1
	Q6AI08|HEAT6_HUMAN	K.KAPAGPSLEETSVSSPK(+238.11).G	50.73	1921.97	17	1	641.666	3	57.01	645	110.95	Suc(Tz)-C3-NH2	HEAT repeat-containing protein 6 OS=Homo sapiens OX=9606 GN=HEATR6 PE=1 SV=1
	Q13263|TIF1B_HUMAN	K.QGSGSSQPM(+15.99)EVQEGYGFGSGDDPYSSAEPHVSGVK(+238.11).R	50.68	3810.63	35	0.5	953.666	4	56.49	469	1000	Suc(Tz)-C3-NH2	Transcription intermediary factor 1-beta OS=Homo sapiens OX=9606 GN=TRIM28 PE=1 SV=5
	Q96KR1|ZFR_HUMAN	R.STAPAVAYDSK(+238.11).Q	50.41	1346.65	11	0.2	449.89	3	20.81	158	1000	Suc(Tz)-C3-NH2	Zinc finger RNA-binding protein OS=Homo sapiens OX=9606 GN=ZFR PE=1 SV=2
	Q9ULC3|RAB23_HUMAN	K.QQIAEDPELTHSSSNK(+238.11).I	50.41	2020.94	16	0.3	674.656	3	21.77	190	1000	Suc(Tz)-C3-NH2	Ras-related protein Rab-23 OS=Homo sapiens OX=9606 GN=RAB23 PE=1 SV=1
	P08243-3|ASNS_HUMAN	K.EAFSDGITSVK(+238.11).N	50.29	1390.67	11	0.5	696.344	2	27.06	395	1000	Suc(Tz)-C3-NH2	Isoform 3 of Asparagine synthetase [glutamine-hydrolyzing] OS=Homo sapiens OX=9606 GN=ASNS
	O75396|SC22B_HUMAN	R.GEALSALDSK(+238.11).A	50.19	1227.61	10	0.8	614.812	2	24.33	169	1000	Suc(Tz)-C3-NH2	Vesicle-trafficking protein SEC22b OS=Homo sapiens OX=9606 GN=SEC22B PE=1 SV=4
	P33981-2|TTK_HUMAN	K.HTTFEQPVFSVSK(+238.11).Q	50.19	1743.86	13	-1.5	582.292	3	28.75	433	1000	Suc(Tz)-C3-NH2	Isoform 2 of Dual specificity protein kinase TTK OS=Homo sapiens OX=9606 GN=TTK
	Q68D85|NR3L1_HUMAN	R.IDPALLTVTSGK(+238.11).S	50.16	1451.8	12	0.7	484.94	3	32.23	396	1000	Suc(Tz)-C3-NH2	Natural cytotoxicity triggering receptor 3 ligand 1 OS=Homo sapiens OX=9606 GN=NCR3LG1 PE=1 SV=1
	Q2NKX8|ERC6L_HUMAN	K.YTEEDPSGETLSSENK(+238.11).S	50.15	2022.87	16	-0.7	675.295	3	23.1	1156	1000	Suc(Tz)-C3-NH2	DNA excision repair protein ERCC-6-like OS=Homo sapiens OX=9606 GN=ERCC6L PE=1 SV=1
	P27816-6|MAP4_HUMAN	K.K(+238.11)PMSLASGLVPAAPPK.R	50.05	1800.99	16	-0.6	451.255	4	59.56	739	54.54	Suc(Tz)-C3-NH2	Isoform 6 of Microtubule-associated protein 4 OS=Homo sapiens OX=9606 GN=MAP4
	Q6FI81-3|CPIN1_HUMAN	K.SSPSVK(+238.11)PAVDPAAAK.L	50.05	1661.87	15	0.3	554.965	3	20.15	174	61.14	Suc(Tz)-C3-NH2	Isoform 3 of Anamorsin OS=Homo sapiens OX=9606 GN=CIAPIN1
	O00571|DDX3X_HUMAN	K.GFYDK(+238.11)DSSGWSSSK.D	49.95	1787.78	14	-0.1	596.932	3	24.9	55	51.2	Suc(Tz)-C3-NH2	ATP-dependent RNA helicase DDX3X OS=Homo sapiens OX=9606 GN=DDX3X PE=1 SV=3
	Q9NUU7|DD19A_HUMAN	K.TSTTAEK(+238.11)TDEEEKEDR.A	49.94	2105.93	16	1	527.491	4	13.91	46	90.57	Suc(Tz)-C3-NH2	ATP-dependent RNA helicase DDX19A OS=Homo sapiens OX=9606 GN=DDX19A PE=1 SV=1
	Q5T1M5|FKB15_HUMAN	R.DSAAPSPIPGADNLSADPVVSPPTSIPFK(+238.11).S	49.91	3084.54	29	0.2	1029.19	3	55.79	334	1000	Suc(Tz)-C3-NH2	FK506-binding protein 15 OS=Homo sapiens OX=9606 GN=FKBP15 PE=1 SV=2
	Q9UKY7|CDV3_HUMAN	R.VQAMQISSEK(+238.11)EEDDNEKR.Q	49.77	2373.09	18	0.4	475.625	5	59.43	109	61.82	Suc(Tz)-C3-NH2	Protein CDV3 homolog OS=Homo sapiens OX=9606 GN=CDV3 PE=1 SV=1
	O15027-5|SC16A_HUMAN	R.QALQSTPLGSSSK(+238.11).S	49.62	1540.78	13	0.9	771.4	2	22.71	72	1000	Carbamidomethylation; Suc(Tz)-C3-NH2	Isoform 5 of Protein transport protein Sec16A OS=Homo sapiens OX=9606 GN=SEC16A
	Q14978|NOLC1_HUMAN	K.NK(+238.11)PGPYSSVPPPSAPPPKK.S	49.61	2182.15	19	1.3	546.546	4	59.8	285	106.42	Carbamidomethylation; Suc(Tz)-C3-NH2	Nucleolar and coiled-body phosphoprotein 1 OS=Homo sapiens OX=9606 GN=NOLC1 PE=1 SV=2
	P51610-4|HCFC1_HUMAN	K.SPISVPGGSALISNLGK(+238.11).V	49.56	1833.99	17	0.9	612.339	3	36.79	682	1000	Suc(Tz)-C3-NH2	Isoform 4 of Host cell factor 1 OS=Homo sapiens OX=9606 GN=HCFC1
	Q9H9C1-2|SPE39_HUMAN	R.TKGDEEEYWNSSK(+238.11).F	49.56	1809.78	13	1	604.268	3	22.58	16	88.04	Suc(Tz)-C3-NH2	Isoform 2 of Spermatogenesis-defective protein 39 homolog OS=Homo sapiens OX=9606 GN=VIPAS39
	Q7Z434-4|MAVS_HUMAN	K.LPTSSK(+238.11)PPGAVPSNALTNPAPSK.L	49.48	2468.3	23	2.3	618.084	4	57.32	190	65.17	Carbamidomethylation; Suc(Tz)-C3-NH2	Isoform 4 of Mitochondrial antiviral-signaling protein OS=Homo sapiens OX=9606 GN=MAVS
	P22234|PUR6_HUMAN	K.TKEVYELLDSPGK(+238.11).V	49.22	1715.87	13	0.8	572.965	3	29.76	30	94.57	Suc(Tz)-C3-NH2	Multifunctional protein ADE2 OS=Homo sapiens OX=9606 GN=PAICS PE=1 SV=3
	Q14677|EPN4_HUMAN	K.ASPDQNASTHTPQSSVK(+238.11).T	49.11	1991.93	17	0.2	498.99	4	17.14	314	1000	Carbamidomethylation; Suc(Tz)-C3-NH2	Clathrin interactor 1 OS=Homo sapiens OX=9606 GN=CLINT1 PE=1 SV=1
	Q9H0B6|KLC2_HUMAN	R.DSAPYGEYGSWYK(+238.11).A	49.01	1759.75	13	0.3	880.881	2	32.45	439	1000	Suc(Tz)-C3-NH2	Kinesin light chain 2 OS=Homo sapiens OX=9606 GN=KLC2 PE=1 SV=1
	Q7Z417|NUFP2_HUMAN	K.DYEIESQNPLASPTNTLLGSAK(+238.11).E	48.99	2585.26	22	0.7	862.761	3	55.36	639	1000	Suc(Tz)-C3-NH2	Nuclear fragile X mental retardation-interacting protein 2 OS=Homo sapiens OX=9606 GN=NUFIP2 PE=1 SV=1
	Q9Y679-3|AUP1_HUMAN	K.GTQSLPTASASK(+238.11).A	48.98	1384.69	12	0.5	693.355	2	19.92	359	1000	Suc(Tz)-C3-NH2	Isoform 2 of Ancient ubiquitous protein 1 OS=Homo sapiens OX=9606 GN=AUP1
	P07814|SYEP_HUMAN	K.SLIGVEYK(+238.11)PVSATGAEDKDK.K	48.81	2344.19	20	1.1	587.056	4	30.24	951	112.07	Suc(Tz)-C3-NH2	Bifunctional glutamate/proline--tRNA ligase OS=Homo sapiens OX=9606 GN=EPRS PE=1 SV=5
	P07814|SYEP_HUMAN	K.SLIGVEYK(+238.11)PVSATGAEDKDKK.K	48.76	2472.29	21	1.8	495.465	5	60.1	951	107.28	Suc(Tz)-C3-NH2	Bifunctional glutamate/proline--tRNA ligase OS=Homo sapiens OX=9606 GN=EPRS PE=1 SV=5
	P60709|ACTB_HUMAN	K.EITALAPSTMK(+238.11).I	48.73	1398.72	11	0.1	700.366	2	27.69	326	1000	Suc(Tz)-C3-NH2	Actin cytoplasmic 1 OS=Homo sapiens OX=9606 GN=ACTB PE=1 SV=1
	Q01082|SPTB2_HUMAN	R.AQTLPTSVVTITSESSPGK(+238.11)R.E	48.69	2296.2	20	0.2	575.058	4	58.15	2344	1000	Suc(Tz)-C3-NH2	Spectrin beta chain non-erythrocytic 1 OS=Homo sapiens OX=9606 GN=SPTBN1 PE=1 SV=2
	Q9Y2U8|MAN1_HUMAN	R.ISASGPESLLGGPGGASAAPAAGSK(+238.11).V	48.68	2347.18	25	4.5	783.403	3	52.11	134	1000	Suc(Tz)-C3-NH2	Inner nuclear membrane protein Man1 OS=Homo sapiens OX=9606 GN=LEMD3 PE=1 SV=2
	P35606-2|COPB2_HUMAN	R.STAQQELDGK(+238.11)PASPTPVIVASHTANKEEK.S	48.67	3270.65	29	0.1	818.669	4	59.77	827	75.68	Suc(Tz)-C3-NH2	Isoform 2 of Coatomer subunit beta' OS=Homo sapiens OX=9606 GN=COPB2
	Q96L91-4|EP400_HUMAN	R.VAQPETPVTLQFQGSK(+238.11).F	48.55	1967.01	16	4.5	656.681	3	51.87	1517	1000	Carbamidomethylation; Suc(Tz)-C3-NH2	Isoform 4 of E1A-binding protein p400 OS=Homo sapiens OX=9606 GN=EP400
	P13196|HEM1_HUMAN	K.VQQTPDGSQQSPDGTQLPSGHPLPATSQGTASK(+238.11).C	48.49	3539.69	33	0.3	885.929	4	26.09	107	1000	Suc(Tz)-C3-NH2	5-aminolevulinate synthase nonspecific mitochondrial OS=Homo sapiens OX=9606 GN=ALAS1 PE=1 SV=2
	Q92945|FUBP2_HUMAN	K.IGGDAATTVNNSTPDFGFGGQK(+238.11).R	48.43	2391.11	22	0.5	798.044	3	52.57	109	1000	Suc(Tz)-C3-NH2	Far upstream element-binding protein 2 OS=Homo sapiens OX=9606 GN=KHSRP PE=1 SV=4
	Q05519-2|SRS11_HUMAN	K.LNHVAAGLVSPSLK(+238.11).S	48.4	1642.92	14	1.5	822.466	2	27.59	211	1000	Suc(Tz)-C3-NH2	Isoform 2 of Serine/arginine-rich splicing factor 11 OS=Homo sapiens OX=9606 GN=SRSF11
	Q8WW12|PCNP_HUMAN	K.FGFAIGSQTTK(+238.11).K	48.37	1393.7	11	1	697.857	2	31.03	81	1000	Suc(Tz)-C3-NH2	PEST proteolytic signal-containing nuclear protein OS=Homo sapiens OX=9606 GN=PCNP PE=1 SV=2
	P54886-2|P5CS_HUMAN	R.GKDHVVSDFSEHGSLK(+238.11).Y	48.32	1978.95	16	-0.4	495.745	4	22.07	779	58.85	Suc(Tz)-C3-NH2; Carbamidomethylation	Isoform Short of Delta-1-pyrroline-5-carboxylate synthase OS=Homo sapiens OX=9606 GN=ALDH18A1
	Q9UHX1-2|PUF60_HUMAN	K.SIDMSWDSVTMK(+238.11).H	48.28	1636.72	12	0.6	819.369	2	35.47	151	1000	Suc(Tz)-C3-NH2	Isoform 2 of Poly(U)-binding-splicing factor PUF60 OS=Homo sapiens OX=9606 GN=PUF60
	Q13263|TIF1B_HUMAN	R.LDLDLTADSQPPVFK(+238.11).V	48.25	1895.96	15	3	948.992	2	38.25	507	1000	Suc(Tz)-C3-NH2	Transcription intermediary factor 1-beta OS=Homo sapiens OX=9606 GN=TRIM28 PE=1 SV=5
	Q9NQW6-2|ANLN_HUMAN	K.QNSVQEQPGTAC(+57.02)LSK(+238.11).F	48.24	1883.88	15	1	628.968	3	21.96	237	1000	Suc(Tz)-C3-NH2	Isoform 2 of Anillin OS=Homo sapiens OX=9606 GN=ANLN
	O75886|STAM2_HUMAN	K.LVNEAPVYSVYSK(+238.11).L	47.9	1705.87	13	0.4	569.63	3	29.47	376	1000	Suc(Tz)-C3-NH2	Signal transducing adapter molecule 2 OS=Homo sapiens OX=9606 GN=STAM2 PE=1 SV=1
	O43491|E41L2_HUMAN	R.SLDGAPIGVMDQSLM(+15.99)K(+238.11).D	47.89	1914.92	16	1.9	639.314	3	34.17	565	1000	Oxidation (M); Suc(Tz)-C3-NH2	Band 4.1-like protein 2 OS=Homo sapiens OX=9606 GN=EPB41L2 PE=1 SV=1
	Q96I25|SPF45_HUMAN	K.HEQGLSTALSVEK(+238.11).T	47.88	1635.82	13	0.7	546.282	3	24.43	269	1000	Suc(Tz)-C3-NH2	Splicing factor 45 OS=Homo sapiens OX=9606 GN=RBM17 PE=1 SV=1
	Q96HJ9-2|FMC1_HUMAN	R.NSMPASSFQQQK(+238.11).L	47.87	1589.73	12	0.9	530.916	3	22.12	252	1000	Suc(Tz)-C3-NH2	Isoform 2 of Protein FMC1 homolog OS=Homo sapiens OX=9606 GN=FMC1
	P60709|ACTB_HUMAN	K.EITALAPSTM(+15.99)K(+238.11).I	47.72	1414.71	11	0.9	708.364	2	24.2	326	1000	Suc(Tz)-C3-NH2	Actin cytoplasmic 1 OS=Homo sapiens OX=9606 GN=ACTB PE=1 SV=1
	Q9UBC2-3|EP15R_HUMAN	K.LDPFESSDPFSSSSVSSK(+238.11).G	47.65	2139.96	18	-0.5	1070.99	2	36.11	719	1000	Suc(Tz)-C3-NH2	Isoform 3 of Epidermal growth factor receptor substrate 15-like 1 OS=Homo sapiens OX=9606 GN=EPS15L1
	P49321-4|NASP_HUMAN	R.K(+238.11)PTDGASSSNC(+57.02)VTDISHLVR.K	47.54	2381.14	20	0.7	596.293	4	29.26	634	1000	Suc(Tz)-C3-NH2	Isoform 4 of Nuclear autoantigenic sperm protein OS=Homo sapiens OX=9606 GN=NASP
	Q9UGV2-3|NDRG3_HUMAN	K.GWIDWAASK(+238.11).L	47.53	1270.61	9	1	636.313	2	35.33	88	1000	Suc(Tz)-C3-NH2	Isoform 3 of Protein NDRG3 OS=Homo sapiens OX=9606 GN=NDRG3
	O43615|TIM44_HUMAN	K.ESLHEVSK(+238.11).S	47.5	1165.57	8	0.7	583.794	2	15.91	138	1000	Suc(Tz)-C3-NH2	Mitochondrial import inner membrane translocase subunit TIM44 OS=Homo sapiens OX=9606 GN=TIMM44 PE=1 SV=2
	Q7Z5L9-2|I2BP2_HUMAN	K.INGEAQPWLSTSTEGLK(+238.11).I	47.23	2068.02	17	4.6	690.351	3	54.77	372	1000	Suc(Tz)-C3-NH2	Isoform 2 of Interferon regulatory factor 2-binding protein 2 OS=Homo sapiens OX=9606 GN=IRF2BP2
	Q4KMP7|TB10B_HUMAN	R.ASAGPAPGPVVTAEGLHPSLPSPTGNSTPLGSSK(+238.11).E	46.89	3375.71	34	2.7	844.936	4	58.65	719	1000	Suc(Tz)-C3-NH2	TBC1 domain family member 10B OS=Homo sapiens OX=9606 GN=TBC1D10B PE=1 SV=3
	A1X283|SPD2B_HUMAN	K.AK(+238.11)PFLSNSLGGQDDTR.G	46.71	1942.95	16	0.4	648.657	3	25.32	805	1000	Suc(Tz)-C3-NH2	SH3 and PX domain-containing protein 2B OS=Homo sapiens OX=9606 GN=SH3PXD2B PE=1 SV=3
	O75396|SC22B_HUMAN	K.ANNLSSLSK(+238.11).K	46.52	1170.6	9	0.7	586.307	2	19.99	178	1000	Suc(Tz)-C3-NH2	Vesicle-trafficking protein SEC22b OS=Homo sapiens OX=9606 GN=SEC22B PE=1 SV=4
	O14654|IRS4_HUMAN	R.AFDEDEDDPYVPM(+15.99)RPGVATPLVSSSDYM(+15.99)PMAPQNVSASK(+238.11).K	46.49	4482.99	39	-1.2	1121.75	4	58.73	729	1000	Suc(Tz)-C3-NH2; Carbamidomethylation	Insulin receptor substrate 4 OS=Homo sapiens OX=9606 GN=IRS4 PE=1 SV=1
	Q9Y6X4|F169A_HUMAN	R.TEDNQSSEMQLTIDSLK(+238.11).D	46.39	2176	17	1.2	726.34	3	34.65	309	1000	Suc(Tz)-C3-NH2; Carbamidomethylation	Soluble lamin-associated protein of 75 kDa OS=Homo sapiens OX=9606 GN=FAM169A PE=1 SV=2
	Q14247|SRC8_HUMAN	K.LQLHESQK(+238.11).D	46.37	1219.63	8	0.8	610.823	2	16.66	263	1000	Carbamidomethylation; Suc(Tz)-C3-NH2	Src substrate cortactin OS=Homo sapiens OX=9606 GN=CTTN PE=1 SV=2
	Q8WWM7|ATX2L_HUMAN	R.IAMENDDGRTEEEK(+238.11)HSAVQR.Q	46.36	2552.17	20	0.7	639.05	4	19.13	326	1000	Suc(Tz)-C3-NH2	Ataxin-2-like protein OS=Homo sapiens OX=9606 GN=ATXN2L PE=1 SV=2
	O95202|LETM1_HUMAN	R.VVAAPQRPGTEPQPEMPDTVLQSETLK(+238.11).D	46.29	3155.59	27	0.3	789.905	4	33.31	526	1000	Suc(Tz)-C3-NH2	Mitochondrial proton/calcium exchanger protein OS=Homo sapiens OX=9606 GN=LETM1 PE=1 SV=1
	P48634-2|PRC2A_HUMAN	R.GPDELEGPDSK(+238.11).L	46.29	1380.62	11	-0.1	691.315	2	21.02	224	1000	Suc(Tz)-C3-NH2	Isoform 2 of Protein PRRC2A OS=Homo sapiens OX=9606 GN=PRRC2A
	Q9UJU6|DBNL_HUMAN	R.AMSTTSISSPQPGK(+238.11).L	46.26	1628.78	14	-0.5	815.398	2	22.35	280	1000	Suc(Tz)-C3-NH2	Drebrin-like protein OS=Homo sapiens OX=9606 GN=DBNL PE=1 SV=1
	Q96CP2|FWCH2_HUMAN	R.QDPGTDRTEDSGLAAGPPEAAGENFAPC(+57.02)SVAPGK(+238.11).S	46.18	3606.63	34	3	902.667	4	54.55	138	1000	Suc(Tz)-C3-NH2	FLYWCH family member 2 OS=Homo sapiens OX=9606 GN=FLYWCH2 PE=1 SV=1
	Q96A26|F162A_HUMAN	K.EDEIPETVSLEMLDAAK(+238.11).N	46.1	2127	17	1.3	1064.51	2	39.94	96	1000	Suc(Tz)-C3-NH2	Protein FAM162A OS=Homo sapiens OX=9606 GN=FAM162A PE=1 SV=2
	O95292|VAPB_HUMAN	K.TETPIVSK(+238.11).S	46.08	1111.59	8	1	556.802	2	19.44	155	1000	Suc(Tz)-C3-NH2	Vesicle-associated membrane protein-associated protein B/C OS=Homo sapiens OX=9606 GN=VAPB PE=1 SV=3
	Q8N3F8|MILK1_HUMAN	R.GSSGPQPAK(+238.11)PC(+57.02)SGATPTPLLLVGDR.S	46.02	2700.37	25	0	676.099	4	60.17	595	1000	Suc(Tz)-C3-NH2	MICAL-like protein 1 OS=Homo sapiens OX=9606 GN=MICALL1 PE=1 SV=2
	Q5JSH3-4|WDR44_HUMAN	R.HLTPEPDIVASTK(+238.11).K	46.01	1644.85	13	1.1	549.29	3	58.7	204	1000	Suc(Tz)-C3-NH2	Isoform 4 of WD repeat-containing protein 44 OS=Homo sapiens OX=9606 GN=WDR44
	Q9H3P7|GCP60_HUMAN	K.VNATVPSNMMSVNGQAK(+238.11).T	45.95	1984.95	17	1	662.657	3	27.75	339	1000	Carbamidomethylation; Suc(Tz)-C3-NH2	Golgi resident protein GCP60 OS=Homo sapiens OX=9606 GN=ACBD3 PE=1 SV=4
	Q92945|FUBP2_HUMAN	K.K(+238.11)LASQGDSISSQLGPIHPPPR.T	45.94	2422.27	21	2.6	606.577	4	60.2	122	1000	Suc(Tz)-C3-NH2	Far upstream element-binding protein 2 OS=Homo sapiens OX=9606 GN=KHSRP PE=1 SV=4
	P43487-2|RANG_HUMAN	K.VAEKLEALSVK(+238.11).E	45.9	1423.8	11	0.8	712.909	2	25.27	189	122.76	Suc(Tz)-C3-NH2	Isoform 2 of Ran-specific GTPase-activating protein OS=Homo sapiens OX=9606 GN=RANBP1
	Q9NZZ3-2|CHMP5_HUMAN	R.DNLAQQSFNMEQANYTIQSLK(+238.11).D	45.85	2680.26	21	4	894.429	3	55.02	100	1000	Suc(Tz)-C3-NH2	Isoform 2 of Charged multivesicular body protein 5 OS=Homo sapiens OX=9606 GN=CHMP5
	P09234|RU1C_HUMAN	K.WMEEQAQSLIDK(+238.11).T	45.84	1714.8	12	1.1	858.407	2	32.47	52	1000	Suc(Tz)-C3-NH2	U1 small nuclear ribonucleoprotein C OS=Homo sapiens OX=9606 GN=SNRPC PE=1 SV=1
	P82979|SARNP_HUMAN	R.FNVPVSLESK(+238.11).K	45.82	1356.7	10	-0.3	453.242	3	32.31	119	1000	Suc(Tz)-C3-NH2	SAP domain-containing ribonucleoprotein OS=Homo sapiens OX=9606 GN=SARNP PE=1 SV=3
	Q8NC51|PAIRB_HUMAN	R.TDK(+238.11)SSASAPDVDDPEAFPALA	45.82	2341.07	21	0.6	781.365	3	55.79	390	1000	Suc(Tz)-C3-NH2	Plasminogen activator inhibitor 1 RNA-binding protein OS=Homo sapiens OX=9606 GN=SERBP1 PE=1 SV=2
	P49790-2|NU153_HUMAN	K.GFDTSSSSSNSAASSSFK(+238.11).F	45.8	1990.85	18	0.8	664.625	3	23.65	862	1000	Suc(Tz)-C3-NH2	Isoform 2 of Nuclear pore complex protein Nup153 OS=Homo sapiens OX=9606 GN=NUP153
	Q99700-2|ATX2_HUMAN	K.RGPEVTSQGVQTSSPAC(+57.02)K(+238.11).Q	45.79	2126.02	18	-0.3	532.511	4	54.92	893	1000	Suc(Tz)-C3-NH2	Isoform 2 of Ataxin-2 OS=Homo sapiens OX=9606 GN=ATXN2
	P07814|SYEP_HUMAN	K.SLIGVEYK(+238.11)PVSATGAEDK.D	45.71	2101.07	18	1.8	701.365	3	53.5	951	71.03	Suc(Tz)-C3-NH2	Bifunctional glutamate/proline--tRNA ligase OS=Homo sapiens OX=9606 GN=EPRS PE=1 SV=5
	P53992|SC24C_HUMAN	R.GPQSNYGGPYPAAPTFGSQPGPPQPLPPK(+238.11).R	45.53	3141.53	29	0.4	1048.18	3	51	319	1000	Carbamidomethylation; Suc(Tz)-C3-NH2	Protein transport protein Sec24C OS=Homo sapiens OX=9606 GN=SEC24C PE=1 SV=3
	Q9NVA2|SEP11_HUMAN	K.AAAQLLQSQAQQSGAQQTK(+238.11).K	45.47	2194.11	19	3.4	1098.07	2	43.69	418	1000	Suc(Tz)-C3-NH2	Septin-11 OS=Homo sapiens OX=9606 GN=SEPTIN11 PE=1 SV=3
	P32322|P5CR1_HUMAN	K.VK(+238.11)LDSPAGTALSPSGHTK.L	45.39	2003.04	18	0.7	668.689	3	22.84	291	74.6	Suc(Tz)-C3-NH2	Pyrroline-5-carboxylate reductase 1 mitochondrial OS=Homo sapiens OX=9606 GN=PYCR1 PE=1 SV=2
	Q04323|UBXN1_HUMAN	K.YGGSVGSQPPPVAPEPGPVPSSPSQEPPTK(+238.11)R.E	45.39	3320.64	31	1.9	831.169	4	54.72	208	1000	Suc(Tz)-C3-NH2	UBX domain-containing protein 1 OS=Homo sapiens OX=9606 GN=UBXN1 PE=1 SV=2
	Q9UHI6|DDX20_HUMAN	K.NSVQTPVENSTNSQHQVK(+238.11).E	45.35	2234.07	18	1.6	559.525	4	19.1	565	1000	Suc(Tz)-C3-NH2	Probable ATP-dependent RNA helicase DDX20 OS=Homo sapiens OX=9606 GN=DDX20 PE=1 SV=2
	Q14444-2|CAPR1_HUMAN	K.SSGPPPPSGSSGSEAAAGAGAAAPASQHPATGTGAVQTEAMK(+238.11).Q	45.26	3940.82	42	-0.9	986.212	4	25.16	55	1000	Suc(Tz)-C3-NH2	Isoform 2 of Caprin-1 OS=Homo sapiens OX=9606 GN=CAPRIN1
	O00231|PSD11_HUMAN	R.EASIDILHSIVK(+238.11).R	45.25	1561.85	12	0.4	781.931	2	35.76	32	1000	Suc(Tz)-C3-NH2	26S proteasome non-ATPase regulatory subunit 11 OS=Homo sapiens OX=9606 GN=PSMD11 PE=1 SV=3
	Q9NUL3-4|STAU2_HUMAN	K.VISGTTLGYLSPK(+238.11).D	45.21	1572.85	13	1.3	787.434	2	31.59	222	1000	Suc(Tz)-C3-NH2	Isoform 4 of Double-stranded RNA-binding protein Staufen homolog 2 OS=Homo sapiens OX=9606 GN=STAU2
	P60709|ACTB_HUMAN	K.DSYVGDEAQSK(+238.11).R	45.15	1435.62	11	0.2	718.818	2	19.52	61	1000	Suc(Tz)-C3-NH2	Actin cytoplasmic 1 OS=Homo sapiens OX=9606 GN=ACTB PE=1 SV=1
	P49023-2|PAXI_HUMAN	R.FIHQQPQSSSPVYGSSAK(+238.11).T	45.04	2185.06	18	-2.3	547.27	4	58.24	93	1000	Carbamidomethylation; Suc(Tz)-C3-NH2	Isoform Alpha of Paxillin OS=Homo sapiens OX=9606 GN=PXN
	Q13136-2|LIPA1_HUMAN	R.NSTGSQDGPVSNPSSSNSSQDSLHK(+238.11).A	45.04	2754.21	25	0.5	689.56	4	19.78	796	1000	Suc(Tz)-C3-NH2	Isoform 2 of Liprin-alpha-1 OS=Homo sapiens OX=9606 GN=PPFIA1
	Q15365|PCBP1_HUMAN	R.LVVPATQC(+57.02)GSLIGK(+238.11).G	45.04	1679.9	14	0.2	840.959	2	30.34	115	1000	Carbamidomethylation; Suc(Tz)-C3-NH2	Poly(rC)-binding protein 1 OS=Homo sapiens OX=9606 GN=PCBP1 PE=1 SV=2
	Q8NI60-3|COQ8A_HUMAN	K.K(+238.11)AVLGSSPFLSEANAER.I	45.04	2013.03	17	-0.3	504.264	4	30.32	194	1000	Suc(Tz)-C3-NH2	Isoform 3 of Atypical kinase COQ8A mitochondrial OS=Homo sapiens OX=9606 GN=COQ8A
	P23588-2|IF4B_HUMAN	K.KPEENPASK(+238.11).F	44.97	1236.61	9	-0.1	413.211	3	53.82	547	139.85	Suc(Tz)-C3-NH2	Isoform 2 of Eukaryotic translation initiation factor 4B OS=Homo sapiens OX=9606 GN=EIF4B
	Q6L8Q7-2|PDE12_HUMAN	K.EAK(+238.11)PGAAEPEVGVPSSLSPSSPSSSWTETDVEER.V	44.85	3736.73	34	-0.1	935.191	4	57.78	202	1000	Suc(Tz)-C3-NH2	Isoform 2 of 2' 5'-phosphodiesterase 12 OS=Homo sapiens OX=9606 GN=PDE12
	Q15417-3|CNN3_HUMAN	K.LTLQPVDNSTISLQM(+15.99)GTNK(+238.11).V	44.76	2313.16	19	2.9	772.064	3	50.98	205	1000	Suc(Tz)-C3-NH2	Isoform 3 of Calponin-3 OS=Homo sapiens OX=9606 GN=CNN3
	Q8TCS8|PNPT1_HUMAN	R.K(+238.11)VLQSPATTVVR.T	44.76	1535.88	12	1.1	512.967	3	21.48	750	1000	Suc(Tz)-C3-NH2	Polyribonucleotide nucleotidyltransferase 1 mitochondrial OS=Homo sapiens OX=9606 GN=PNPT1 PE=1 SV=2
	Q8WWM7|ATX2L_HUMAN	K.DK(+238.11)FTDSAIAMNSK.V	44.66	1664.78	13	0.7	555.935	3	25.61	207	64.84	Suc(Tz)-C3-NH2	Ataxin-2-like protein OS=Homo sapiens OX=9606 GN=ATXN2L PE=1 SV=2
	P57721-5|PCBP3_HUMAN	R.LVVPASQC(+57.02)GSLIGK(+238.11).G	44.6	1665.89	14	0.8	556.303	3	52.02	147	1000	Carbamidomethylation; Suc(Tz)-C3-NH2	Isoform 5 of Poly(rC)-binding protein 3 OS=Homo sapiens OX=9606 GN=PCBP3
	Q9NR12|PDLI7_HUMAN	R.YTFAPSVSLNK(+238.11).T	44.51	1463.74	11	3.3	732.88	2	30.82	114	1000	Suc(Tz)-C3-NH2	PDZ and LIM domain protein 7 OS=Homo sapiens OX=9606 GN=PDLIM7 PE=1 SV=1
	Q15814|TBCC_HUMAN	K.VDAAPGIPPAVESIQDSPLPK(+238.11).K	44.4	2338.22	21	4	780.416	3	53.67	172	1000	Suc(Tz)-C3-NH2	Tubulin-specific chaperone C OS=Homo sapiens OX=9606 GN=TBCC PE=1 SV=2
	Q9BSJ2|GCP2_HUMAN	R.AELAAAAVGSSTTSINVPAAASK(+238.11).I	44.36	2324.2	23	2.9	775.742	3	48.91	128	1000	Suc(Tz)-C3-NH2	Gamma-tubulin complex component 2 OS=Homo sapiens OX=9606 GN=TUBGCP2 PE=1 SV=2
	P46783|RS10_HUMAN	K.K(+238.11)AEAGAGSATEFQFR.G	44.32	1806.86	15	0.4	452.724	4	59.33	139	1000	Suc(Tz)-C3-NH2	40S ribosomal protein S10 OS=Homo sapiens OX=9606 GN=RPS10 PE=1 SV=1
	Q16555-2|DPYL2_HUMAN	R.GLYDGPVC(+57.02)EVSVTPK(+238.11).T	44.16	1857.89	15	1.3	620.306	3	52.35	475	1000	Suc(Tz)-C3-NH2	Isoform 2 of Dihydropyrimidinase-related protein 2 OS=Homo sapiens OX=9606 GN=DPYSL2
	O43491|E41L2_HUMAN	K.VEMQPTELVSK(+238.11).E	44.11	1497.75	11	0.4	500.257	3	27.93	171	1000	Suc(Tz)-C3-NH2	Band 4.1-like protein 2 OS=Homo sapiens OX=9606 GN=EPB41L2 PE=1 SV=1
	Q8NC51|PAIRB_HUMAN	R.GGSGSHNWGTVK(+238.11)DELTESPK.Y	44.07	2323.08	20	0.1	581.778	4	27.3	228	78.75	Suc(Tz)-C3-NH2	Plasminogen activator inhibitor 1 RNA-binding protein OS=Homo sapiens OX=9606 GN=SERBP1 PE=1 SV=2
	Q15417-3|CNN3_HUMAN	K.LTLQPVDNSTISLQMGTNK(+238.11).V	43.89	2297.17	19	1.4	766.731	3	35.7	205	1000	Suc(Tz)-C3-NH2	Isoform 3 of Calponin-3 OS=Homo sapiens OX=9606 GN=CNN3
	Q7L014|DDX46_HUMAN	R.GGTILAPTVSAK(+238.11).T	43.85	1351.75	12	2	676.882	2	50.97	894	1000	Suc(Tz)-C3-NH2	Probable ATP-dependent RNA helicase DDX46 OS=Homo sapiens OX=9606 GN=DDX46 PE=1 SV=2
	Q14247|SRC8_HUMAN	K.SAVGHEYQSK(+238.11).L	43.71	1342.63	10	-0.1	448.549	3	15.14	107	1000	Suc(Tz)-C3-NH2	Src substrate cortactin OS=Homo sapiens OX=9606 GN=CTTN PE=1 SV=2
	Q9BZG1-4|RAB34_HUMAN	R.INSDDSNLYLTASK(+238.11).K	43.59	1777.85	14	0.9	593.624	3	27.85	230	1000	Suc(Tz)-C3-NH2	Isoform 4 of Ras-related protein Rab-34 OS=Homo sapiens OX=9606 GN=RAB34
	O75533|SF3B1_HUMAN	R.AK(+238.11)GSETPGATPGSK.I	43.52	1524.75	14	0.8	509.259	3	13.62	240	54.4	Suc(Tz)-C3-NH2	Splicing factor 3B subunit 1 OS=Homo sapiens OX=9606 GN=SF3B1 PE=1 SV=3
	Q9UQ35|SRRM2_HUMAN	K.SSTPPGESYFGVSSLQLK(+238.11).G	43.39	2121.04	18	1.1	708.021	3	37.19	1058	1000	Carbamidomethylation; Suc(Tz)-C3-NH2	Serine/arginine repetitive matrix protein 2 OS=Homo sapiens OX=9606 GN=SRRM2 PE=1 SV=2
	P07355-2|ANXA2_HUMAN	K.LSLEGDHSTPPSAYGSVK(+238.11).A	43.36	2082	18	0.9	521.508	4	26.93	46	1000	Suc(Tz)-C3-NH2	Isoform 2 of Annexin A2 OS=Homo sapiens OX=9606 GN=ANXA2
	Q92783-2|STAM1_HUMAN	K.LMNEDPMYSMYAK(+238.11).L	43.3	1829.78	13	0.3	915.897	2	32.55	386	1000	Suc(Tz)-C3-NH2	Isoform 2 of Signal transducing adapter molecule 1 OS=Homo sapiens OX=9606 GN=STAM
	Q9C0E8-3|LNP_HUMAN	R.NLSPTPASPNQGPPPQVPVSPGPPK(+238.11).D	43.29	2697.39	25	-0.2	900.136	3	44.42	76	1000	Suc(Tz)-C3-NH2	Isoform 3 of Endoplasmic reticulum junction formation protein lunapark OS=Homo sapiens OX=9606 GN=LNPK
	O76070|SYUG_HUMAN	K.TKENVVQSVTSVAEK(+238.11).T	43.07	1855.96	15	1.9	619.663	3	57.73	58	117.34	Suc(Tz)-C3-NH2	Gamma-synuclein OS=Homo sapiens OX=9606 GN=SNCG PE=1 SV=2
	Q96J02-3|ITCH_HUMAN	R.FIYGNQDLFATSQSK(+238.11).E	43.06	1955.94	15	1.4	652.987	3	34.87	281	1000	Suc(Tz)-C3-NH2	Isoform 3 of E3 ubiquitin-protein ligase Itchy homolog OS=Homo sapiens OX=9606 GN=ITCH
	P52594-2|AGFG1_HUMAN	K.APVGSVVSVPSQSSASSDK(+238.11).Y	43.03	2026	19	2.1	676.341	3	25.66	333	1000	Suc(Tz)-C3-NH2	Isoform 2 of Arf-GAP domain and FG repeat-containing protein 1 OS=Homo sapiens OX=9606 GN=AGFG1
	Q9UBC2-3|EP15R_HUMAN	K.NDPFTSDPFTK(+238.11).N	42.9	1505.68	11	0.2	753.847	2	55.3	694	1000	Suc(Tz)-C3-NH2	Isoform 3 of Epidermal growth factor receptor substrate 15-like 1 OS=Homo sapiens OX=9606 GN=EPS15L1
	Q9Y2J2-2|E41L3_HUMAN	K.TETISFGSVSPGGVK(+238.11).L	42.88	1702.85	15	2.5	852.436	2	53.3	745	1000	Suc(Tz)-C3-NH2	Isoform 2 of Band 4.1-like protein 3 OS=Homo sapiens OX=9606 GN=EPB41L3
	Q99961-3|SH3G1_HUMAN	K.LTMLNTVSK(+238.11).I	42.77	1243.66	9	0.6	622.837	2	26.96	76	1000	Suc(Tz)-C3-NH2	Isoform 3 of Endophilin-A2 OS=Homo sapiens OX=9606 GN=SH3GL1
	O95232|LC7L3_HUMAN	R.STTSTIESFAAQEK(+238.11).Q	42.68	1736.82	14	0.4	579.948	3	29.86	187	1000	Suc(Tz)-C3-NH2	Luc7-like protein 3 OS=Homo sapiens OX=9606 GN=LUC7L3 PE=1 SV=2
	Q9UNZ2-6|NSF1C_HUMAN	K.LGSTAPQVLSTSSPAQQAENEAK(+238.11).A	42.68	2551.25	23	1.4	851.426	3	45.6	171	1000	Oxidation (M); Suc(Tz)-C3-NH2	Isoform 4 of NSFL1 cofactor p47 OS=Homo sapiens OX=9606 GN=NSFL1C
	Q13283|G3BP1_HUMAN	K.VPASQPRPESK(+238.11)PESQIPPQRPQR.D	42.63	2846.49	23	1.2	475.423	6	60.33	287	1000	Suc(Tz)-C3-NH2	Ras GTPase-activating protein-binding protein 1 OS=Homo sapiens OX=9606 GN=G3BP1 PE=1 SV=1
	Q8TAB3-3|PCD19_HUMAN	K.RLK(+238.11)DIVL	42.63	1093.66	7	4.1	547.84	2	43.46	1096	1000	Suc(Tz)-C3-NH2	Isoform 3 of Protocadherin-19 OS=Homo sapiens OX=9606 GN=PCDH19
	Q8NEZ2-3|VP37A_HUMAN	K.SASSSAAGSPGGLTSLQQQK(+238.11).Q	42.45	2099.02	20	1.6	700.683	3	24.61	29	1000	Suc(Tz)-C3-NH2	Isoform 3 of Vacuolar protein sorting-associated protein 37A OS=Homo sapiens OX=9606 GN=VPS37A
	Q96AE4|FUBP1_HUMAN	K.IGGDAGTSLNSNDYGYGGQK(+238.11).R	42.34	2210.98	20	0.3	738.002	3	44.02	64	1000	Suc(Tz)-C3-NH2	Far upstream element-binding protein 1 OS=Homo sapiens OX=9606 GN=FUBP1 PE=1 SV=3
	P17096|HMGA1_HUMAN	R.KQPPVSPGTALVGSQK(+238.11).E	42.32	1831	16	-0.3	458.756	4	57.55	46	82.16	Suc(Tz)-C3-NH2	High mobility group protein HMG-I/HMG-Y OS=Homo sapiens OX=9606 GN=HMGA1 PE=1 SV=3
	Q96A49|SYAP1_HUMAN	K.K(+238.11)ITESVAETAQTIK.K	42.32	1755.94	14	0.5	586.32	3	24.43	71	75.67	Suc(Tz)-C3-NH2	Synapse-associated protein 1 OS=Homo sapiens OX=9606 GN=SYAP1 PE=1 SV=1
	Q13263|TIF1B_HUMAN	K.LTEDK(+238.11)ADVQSIIGLQR.F	42.3	2023.07	16	0.6	506.775	4	31.83	779	1000	Suc(Tz)-C3-NH2	Transcription intermediary factor 1-beta OS=Homo sapiens OX=9606 GN=TRIM28 PE=1 SV=5
	Q9NRL3|STRN4_HUMAN	R.APPGPAGLSGGESLLVK(+238.11).Q	42.04	1786.96	17	0.5	596.66	3	54.92	238	1000	Suc(Tz)-C3-NH2	Striatin-4 OS=Homo sapiens OX=9606 GN=STRN4 PE=1 SV=2
	P14859-4|PO2F1_HUMAN	R.TIAATPIQTLPQSQSTPK(+238.11).R	41.96	2119.13	18	2.6	707.385	3	49.32	272	1000	Suc(Tz)-C3-NH2	Isoform 4 of POU domain class 2 transcription factor 1 OS=Homo sapiens OX=9606 GN=POU2F1
	Q92667-2|AKAP1_HUMAN	K.SIPLEC(+57.02)PLSSPK(+238.11).G	41.69	1564.79	12	0.3	522.605	3	53.65	153	1000	Suc(Tz)-C3-NH2	Isoform 2 of A-kinase anchor protein 1 mitochondrial OS=Homo sapiens OX=9606 GN=AKAP1
	Q8WTW3|COG1_HUMAN	R.QLVSEEDNTSAPSLFK(+238.11).L	41.55	2001.96	16	2.1	668.33	3	54.15	971	1000	Suc(Tz)-C3-NH2	Conserved oligomeric Golgi complex subunit 1 OS=Homo sapiens OX=9606 GN=COG1 PE=1 SV=1
	Q8IX90|SKA3_HUMAN	K.NSIALVSTNYPLSK(+238.11).T	41.5	1743.92	14	0.6	872.966	2	32.93	314	1000	Suc(Tz)-C3-NH2	Spindle and kinetochore-associated protein 3 OS=Homo sapiens OX=9606 GN=SKA3 PE=1 SV=2
	P22234|PUR6_HUMAN	K.EVYELLDSPGK(+238.11).V	41.43	1486.73	11	6.6	744.377	2	30.85	30	1000	Oxidation (M); Suc(Tz)-C3-NH2	Multifunctional protein ADE2 OS=Homo sapiens OX=9606 GN=PAICS PE=1 SV=3
	O15498|YKT6_HUMAN	K.SEVLGTQSK(+238.11).A	40.97	1185.6	9	0.8	593.807	2	18.04	182	1000	Suc(Tz)-C3-NH2	Synaptobrevin homolog YKT6 OS=Homo sapiens OX=9606 GN=YKT6 PE=1 SV=1
	Q9C0C2|TB182_HUMAN	K.DTQSPSTC(+57.02)SEGLLGWSQK(+238.11).D	40.8	2218	18	-0.5	740.339	3	33.63	726	1000	Suc(Tz)-C3-NH2	182 kDa tankyrase-1-binding protein OS=Homo sapiens OX=9606 GN=TNKS1BP1 PE=1 SV=4
	P07910-4|HNRPC_HUMAN	K.NDKSEEEQSSSSVK(+238.11).K	40.59	1790.79	14	0.7	597.938	3	13.61	187	55.94	Suc(Tz)-C3-NH2	Isoform 4 of Heterogeneous nuclear ribonucleoproteins C1/C2 OS=Homo sapiens OX=9606 GN=HNRNPC
	Q9BUK6-7|MSTO1_HUMAN	K.GSSPLPTATTPK(+238.11)PLIPTEASIR.V	40.55	2471.34	22	2.5	618.843	4	59.61	117	1000	Suc(Tz)-C3-NH2	Isoform 7 of Protein misato homolog 1 OS=Homo sapiens OX=9606 GN=MSTO1
	O75152|ZC11A_HUMAN	K.VEVETSGIGDSLLNVK(+238.11).C	40.52	1896.98	16	-2.1	949.495	2	35.35	635	1000	Suc(Tz)-C3-NH2	Zinc finger CCCH domain-containing protein 11A OS=Homo sapiens OX=9606 GN=ZC3H11A PE=1 SV=3
	P13797-3|PLST_HUMAN	K.EGIC(+57.02)ALGGTSELSSEGTQHSYSEEEK(+238.11).Y	40.36	3022.31	26	1.5	756.586	4	58.11	81	1000	Suc(Tz)-C3-NH2	Isoform 3 of Plastin-3 OS=Homo sapiens OX=9606 GN=PLS3
	P13196|HEM1_HUMAN	K.EVAETSAGPSVVSVK(+238.11).T	40.35	1696.86	15	0.9	566.629	3	24.67	157	1000	Suc(Tz)-C3-NH2	5-aminolevulinate synthase nonspecific mitochondrial OS=Homo sapiens OX=9606 GN=ALAS1 PE=1 SV=2
	Q8IWZ3-6|ANKH1_HUMAN	R.LEGEVTPNSLSTSYK(+238.11).T	40.28	1861.91	15	2.8	621.644	3	28.35	1662	1000	Suc(Tz)-C3-NH2	Isoform 6 of Ankyrin repeat and KH domain-containing protein 1 OS=Homo sapiens OX=9606 GN=ANKHD1
	Q86YP4-2|P66A_HUMAN	K.EATAQK(+238.11)PTGSVGSTVTTPPPLVR.G	40.27	2531.33	23	1.6	633.842	4	58.62	178	1000	Suc(Tz)-C3-NH2	Isoform 2 of Transcriptional repressor p66-alpha OS=Homo sapiens OX=9606 GN=GATAD2A
	O00571|DDX3X_HUMAN	K.DSSGWSSSK(+238.11).D	40.2	1177.5	9	0.7	589.758	2	18.09	64	1000	Suc(Tz)-C3-NH2	ATP-dependent RNA helicase DDX3X OS=Homo sapiens OX=9606 GN=DDX3X PE=1 SV=3
	O95202|LETM1_HUMAN	R.VVAAPQRPGTEPQPEM(+15.99)PDTVLQSETLK(+238.11).D	40.05	3171.59	27	5.5	793.908	4	58.11	526	1000	Carbamidomethylation; Suc(Tz)-C3-NH2	Mitochondrial proton/calcium exchanger protein OS=Homo sapiens OX=9606 GN=LETM1 PE=1 SV=1
	Q8TD19|NEK9_HUMAN	K.VASEAPLEHK(+238.11)PQVEASSPR.L	39.74	2269.14	19	0.1	454.836	5	59.99	862	1000	Suc(Tz)-C3-NH2	Serine/threonine-protein kinase Nek9 OS=Homo sapiens OX=9606 GN=NEK9 PE=1 SV=2
	Q9UPY5|XCT_HUMAN	R.KPVVSTISK(+238.11).G	39.73	1195.69	9	0.4	399.572	3	17.75	12	98.53	Suc(Tz)-C3-NH2	Cystine/glutamate transporter OS=Homo sapiens OX=9606 GN=SLC7A11 PE=1 SV=1
	P34932|HSP74_HUMAN	K.AESEEMETSQAGSK(+238.11).D	39.62	1720.72	14	-1.3	861.367	2	17.22	557	1000	Suc(Tz)-C3-NH2	Heat shock 70 kDa protein 4 OS=Homo sapiens OX=9606 GN=HSPA4 PE=1 SV=4
	Q7L0Y3|TM10C_HUMAN	K.SSVQEEC(+57.02)VSTISSSK(+238.11).D	39.62	1864.85	15	1.2	622.624	3	23.29	86	1000	Suc(Tz)-C3-NH2	tRNA methyltransferase 10 homolog C OS=Homo sapiens OX=9606 GN=TRMT10C PE=1 SV=2
	O00571|DDX3X_HUMAN	K.DK(+238.11)DAYSSFGSR.S	39.57	1469.65	11	0.2	490.892	3	53.85	66	1000	Suc(Tz)-C3-NH2	ATP-dependent RNA helicase DDX3X OS=Homo sapiens OX=9606 GN=DDX3X PE=1 SV=3
	P11940-2|PABP1_HUMAN	K.EFSPFGTITSAK(+238.11).V	39.51	1521.75	12	1.4	508.257	3	34.6	324	1000	Suc(Tz)-C3-NH2	Isoform 2 of Polyadenylate-binding protein 1 OS=Homo sapiens OX=9606 GN=PABPC1
	Q9BVC5|ASHWN_HUMAN	K.LSNSSSSVSPLILSSNLPVNNK(+238.11).T	39.3	2494.3	22	3.8	832.445	3	55.22	163	1000	Suc(Tz)-C3-NH2	Ashwin OS=Homo sapiens OX=9606 GN=C2orf49 PE=1 SV=1
	Q9H2M9|RBGPR_HUMAN	K.SK(+238.11)HEEEAVQK.Q	39.15	1421.69	10	0.4	474.904	3	14.05	355	78.75	Suc(Tz)-C3-NH2	Rab3 GTPase-activating protein non-catalytic subunit OS=Homo sapiens OX=9606 GN=RAB3GAP2 PE=1 SV=1
	Q06830|PRDX1_HUMAN	K.SKEYFSK(+238.11).Q	39.09	1125.55	7	0.6	563.78	2	57.73	197	76.17	Suc(Tz)-C3-NH2	Peroxiredoxin-1 OS=Homo sapiens OX=9606 GN=PRDX1 PE=1 SV=1
	Q9UHX1-2|PUF60_HUMAN	K.YAMEQSIK(+238.11).S	38.96	1206.57	8	0.4	604.293	2	22.35	80	1000	Suc(Tz)-C3-NH2	Isoform 2 of Poly(U)-binding-splicing factor PUF60 OS=Homo sapiens OX=9606 GN=PUF60
	P09651-2|ROA1_HUMAN	K.SESPK(+238.11)EPEQLRK.L	38.95	1664.85	12	-0.2	417.219	4	59.8	8	51.59	Suc(Tz)-C3-NH2	Isoform A1-A of Heterogeneous nuclear ribonucleoprotein A1 OS=Homo sapiens OX=9606 GN=HNRNPA1
	Q6IAA8|LTOR1_HUMAN	R.TDEQALLSSILAK(+238.11).T	38.76	1625.86	13	-3.5	542.96	3	59.48	60	1000	Suc(Tz)-C3-NH2	Ragulator complex protein LAMTOR1 OS=Homo sapiens OX=9606 GN=LAMTOR1 PE=1 SV=2
	O00151|PDLI1_HUMAN	R.VITNQYNNPAGLYSSENISNFNNALESK(+238.11).T	38.74	3338.58	28	-0.1	1113.87	3	55.56	166	1000	Suc(Tz)-C3-NH2	PDZ and LIM domain protein 1 OS=Homo sapiens OX=9606 GN=PDLIM1 PE=1 SV=4

## Sheet: Table S3
Table S3 Entire data of KEGG pathway analysis of enriched proteins.
	Descriptions of Column Names:
	Term: description of the pathway
	P-value: the statistical significance of the term.
	-LogP: logarithm of P-value
	Count: Identified proteins associated with Term
	Category: Category names classified on the KEGG Pathway database
	Path code: ID code of the term on the KEGG Pathway database
	Term	P-Value	-LogP	Count	Category	Path code
	Amyotrophic lateral sclerosis	5.9e-23	22.2291	136	Human Diseases	05014
	Spliceosome	5.1e-22	21.2924	75	Genetic Information Processing	03040
	Proteasome	6e-18	17.2218	35	Genetic Information Processing	03050
	Parkinson disease	1e-17	17	101	Human Diseases	05012
	Huntington disease	1.1e-17	16.9586	111	Human Diseases	05016
	Prion disease	8.1e-17	16.0915	101	Human Diseases	05020
	Endocytosis	6.6e-16	15.1805	94	Cellular Processes	04144
	Ribosome	9.9e-16	15.0044	69	Genetic Information Processing	03010
	Nucleocytoplasmic transport	9.7e-15	14.0132	53	Genetic Information Processing	03013
	Pathways of neurodegeneration - multiple diseases	1.1e-14	13.9586	144	Human Diseases	05022
	Alzheimer disease	5.1e-13	12.2924	119	Human Diseases	05010
	mRNA surveillance pathway	6.3e-11	10.2007	44	Genetic Information Processing	03015
	Carbon metabolism	9.1e-10	9.04096	47	Metabolism	01200
	Protein processing in endoplasmic reticulum	2.8e-08	7.55284	58	Genetic Information Processing	04141
	Coronavirus disease - COVID-19	3.2e-08	7.49485	72	Human Diseases	05171
	Spinocerebellar ataxia	3.5e-08	7.45593	51	Human Diseases	05017
	Chemical carcinogenesis - reactive oxygen species	1.7e-07	6.76955	68	Human Diseases	05208
	Citrate cycle (TCA cycle)	5.4e-07	6.26761	18	Metabolism	00020
	Biosynthesis of amino acids	7.7e-07	6.11351	31	Metabolism	01230
	Adherens junction	2.5e-06	5.60206	29	Cellular Processes	04520
	Tight junction	1e-05	5	51	Cellular Processes	04530
	Oxidative phosphorylation	1.1e-05	4.95861	43	Metabolism	00190
	Diabetic cardiomyopathy	1.4e-05	4.85387	58	Human Diseases	05415
	DNA replication	1.5e-05	4.82391	18	Genetic Information Processing	03030
	Thermogenesis	1.6e-05	4.79588	64	Organismal Systems	04714
	Viral carcinogenesis	1.7e-05	4.76955	58	Human Diseases	05203
	Nucleotide metabolism	4.4e-05	4.35655	30	Metabolism	01232
	Salmonella infection	4.6e-05	4.33724	66	Human Diseases	05132
	Vasopressin-regulated water reabsorption	8.8e-05	4.05552	19	Organismal Systems	04962
	Bacterial invasion of epithelial cells	0.00013	3.88606	27	Human Diseases	05100
	Renal cell carcinoma	0.00014	3.85387	25	Human Diseases	05211
	Fatty acid degradation	0.00023	3.63827	18	Metabolism	00071
	Valine, leucine and isoleucine degradation	0.00033	3.48149	19	Metabolism	00280
	Shigellosis	0.00041	3.38722	62	Human Diseases	05131
	Arginine and proline metabolism	0.00058	3.23657	19	Metabolism	00330
	Biosynthesis of cofactors	0.00064	3.19382	42	Metabolism	01240
	Pathogenic Escherichia coli infection	0.00068	3.16749	51	Human Diseases	05130
	Pyruvate metabolism	0.00077	3.11351	18	Metabolism	00620
	SNARE interactions in vesicular transport	0.0013	2.88606	14	Genetic Information Processing	04130
	Pentose phosphate pathway	0.0017	2.76955	13	Metabolism	00030
	Glutathione metabolism	0.0032	2.49485	19	Metabolism	00480
	Aminoacyl-tRNA biosynthesis	0.0033	2.48149	21	Genetic Information Processing	00970
	Cellular senescence	0.0034	2.46852	40	Cellular Processes	04218
	Non-alcoholic fatty liver disease	0.0054	2.26761	39	Human Diseases	04932
	Cysteine and methionine metabolism	0.0057	2.24413	17	Metabolism	00270
	Glyoxylate and dicarboxylate metabolism	0.0057	2.24413	12	Metabolism	00630
	Cell cycle	0.0058	2.23657	33	Cellular Processes	04110
	Epstein-Barr virus infection	0.0062	2.20761	48	Human Diseases	05169
	RNA degradation	0.0067	2.17393	23	Genetic Information Processing	03018
	Ubiquitin mediated proteolysis	0.0067	2.17393	36	Genetic Information Processing	04120
	Mismatch repair	0.0075	2.12494	10	Genetic Information Processing	03430
	Chronic myeloid leukemia	0.0087	2.06048	22	Human Diseases	05220
	Pyrimidine metabolism	0.0094	2.02687	18	Metabolism	00240
	Metabolic pathways	0.0097	2.01323	284	Metabolism	01100
	Mitophagy - animal	0.0097	2.01323	21	Cellular Processes	04137
	Viral life cycle - HIV-1	0.01	2	19	Genetic Information Processing	03250
	Purine metabolism	0.013	1.88606	32	Metabolism	00230
	Central carbon metabolism in cancer	0.015	1.82391	20	Human Diseases	05230
	Autophagy - animal	0.018	1.74473	34	Cellular Processes	04140
	Thyroid hormone signaling pathway	0.019	1.72125	30	Organismal Systems	04919
	Phagosome	0.019	1.72125	36	Cellular Processes	04145
	Fc gamma R-mediated phagocytosis	0.021	1.67778	25	Organismal Systems	04666
	Human T-cell leukemia virus 1 infection	0.022	1.65758	49	Human Diseases	05166
	Protein export	0.025	1.60206	9	Genetic Information Processing	03060
	2-Oxocarboxylic acid metabolism	0.025	1.60206	8	Metabolism	01210
	Tryptophan metabolism	0.033	1.48149	13	Metabolism	00380
	One carbon pool by folate	0.034	1.46852	8	Metabolism	00670
	Nucleotide excision repair	0.034	1.46852	14	Genetic Information Processing	03420
	Human immunodeficiency virus 1 infection	0.035	1.45593	46	Human Diseases	05170
	Regulation of actin cytoskeleton	0.037	1.4318	47	Cellular Processes	04810
	Fatty acid metabolism	0.037	1.4318	16	Metabolism	01212
	Glycolysis / Gluconeogenesis	0.038	1.42022	18	Metabolism	00010
	Lysine degradation	0.043	1.36653	17	Metabolism	00310
	Non-homologous end-joining	0.047	1.3279	6	Genetic Information Processing	03450
	Yersinia infection	0.053	1.27572	31	Human Diseases	05135
	Basal transcription factors	0.053	1.27572	13	Genetic Information Processing	03022
	Vibrio cholerae infection	0.054	1.26761	14	Human Diseases	05110
	Thyroid cancer	0.068	1.16749	11	Human Diseases	05216
	Neurotrophin signaling pathway	0.069	1.16115	27	Organismal Systems	04722
	Legionellosis	0.071	1.14874	15	Human Diseases	05134
	AMPK signaling pathway	0.075	1.12494	27	Environmental Information Processing	04152
	Endocrine and other factor-regulated calcium reabsorption	0.081	1.09151	14	Organismal Systems	04961
	Notch signaling pathway	0.091	1.04096	15	Environmental Information Processing	04330
	Drug metabolism - other enzymes	0.093	1.03152	19	Metabolism	00983
	Epithelial cell signaling in Helicobacter pylori infection	0.097	1.01323	17	Human Diseases	05120
